# Supplementary material
Source: PubMed Central journal article supplement (PMC6378654)

## SUPPORTING INFORMATION

### Structure-based design of inhibitors selective for human proteasome $\beta$ 2c or $\beta$ 2i subunits

*Bo-Tao Xin<sup>†,1</sup>, Eva M. Huber<sup>§,1</sup>, Gerjan de Bruin<sup>†</sup>, Wolfgang Heinemeyer<sup>§</sup>, Elmer Maurits<sup>†</sup>, Christofer Espinal<sup>†</sup>, Yimeng Du<sup>†</sup>, Marissa Janssens<sup>†</sup>, Emily S. Weyburne<sup>#</sup>, Alexei F. Kisselev<sup>#&</sup>, Bogdan I. Florea<sup>†</sup>, Christoph Driessen<sup>‡</sup>, Gijsbert A. van der Marel<sup>†</sup>, Michael Groll<sup>§,\*</sup> and Herman S. Overkleeft<sup>†,\*</sup>*

<sup>†</sup>Gorlaeus Laboratories, Leiden Institute of Chemistry and Netherlands Proteomics Centre, Einsteinweg 55, 2333 CC Leiden, The Netherlands

<sup>§</sup>Center for Integrated Protein Science at the Department Chemie, Lehrstuhl für Biochemie, Technische Universität München, 85748 Garching, Germany

<sup>‡</sup>Department of Hematology and Oncology, Kantonsspital St. Gallen, 9007 St. Gallen, Switzerland

<sup>#</sup>Department of Molecular and Systems Biology and Norris Cotton Cancer Center, Geisel School of Medicine at Dartmouth, 1 Medical Centre Drive HB7936, Lebanon, New Hampshire 03756, United States of America.

\*To whom correspondence should be addressed.

<sup>1</sup>These authors contributed equally.

\*Corresponding author:

Herman S. Overkleeft: [h.s.overkleeft@chem.leidenuniv.nl](mailto:h.s.overkleeft@chem.leidenuniv.nl)

Michael Groll: [michael.groll@tum.de](mailto:michael.groll@tum.de)

## Contents

page

|    |                                                                                                                                                                                                         |
|----|---------------------------------------------------------------------------------------------------------------------------------------------------------------------------------------------------------|
| 4  | Figure S1: Structure of the activity-based probes used.                                                                                                                                                 |
| 4  | Figure S2: Inhibition profiles of compounds <b>4</b> , <b>6-36</b> , as determined in Raji cell lysate                                                                                                  |
| 5  | Table S1: The apparent IC <sub>50</sub> values of compounds <b>4</b> , <b>6-36</b> , as determined in Raji cell lysate.                                                                                 |
| 7  | Table S2: The apparent pIC <sub>50</sub> values of compounds <b>4</b> , <b>6-36</b> , as determined in Raji cell lysate.                                                                                |
| 8  | Figure S3: Inhibition profiles of compounds <b>1</b> , <b>4</b> , <b>7</b> , <b>13</b> , <b>16</b> , <b>18</b> , <b>20</b> , <b>22</b> and <b>25</b> , determined in Raji cell lysate.                  |
| 8  | Table S3: The apparent pIC <sub>50</sub> values of compounds <b>1</b> , <b>4</b> , <b>7</b> , <b>13</b> , <b>16</b> , <b>18</b> , <b>20</b> , <b>22</b> and <b>25</b> , determined in Raji cell lysate. |
| 9  | Figure S4: Inhibition profiles of compounds <b>1</b> , <b>4</b> , <b>7</b> , <b>13</b> , <b>16</b> , <b>18</b> , <b>20</b> , <b>22</b> and <b>25</b> , determined in intact RPMI-8226 cells.            |
| 9  | Table S4: The apparent pIC <sub>50</sub> values of compounds <b>13</b> and <b>16</b> , determined in Raji cell lysates.                                                                                 |
| 10 | Figure S5: Inhibition profiles of compounds <b>5</b> , <b>37-53</b> , determined in Raji cell lysate.                                                                                                   |
| 10 | Table S5: The apparent IC <sub>50</sub> values of compounds <b>5</b> , <b>37-53</b> , determined in Raji cell lysate.                                                                                   |
| 10 | Table S6: The apparent pIC <sub>50</sub> values of compounds <b>5</b> , <b>37-53</b> , determined in Raji cell lysate.                                                                                  |
| 12 | Figure S6: Inhibition profiles of compounds <b>5</b> , <b>39</b> , <b>44a</b> and <b>44b</b> , determined in Raji cell lysate.                                                                          |
| 12 | Table S7: The apparent pIC <sub>50</sub> values of compounds <b>5</b> , <b>39</b> , <b>44a</b> and <b>44b</b> , determined in Raji cell lysate.                                                         |
| 12 | Figure S7: Inhibition profiles of compounds <b>68</b> , <b>71</b> , <b>74</b> , <b>77</b> , <b>86</b> and <b>87</b> , determined in Raji cell lysate.                                                   |
| 13 | Table S8: The apparent pIC <sub>50</sub> values of compounds <b>68</b> , <b>71</b> , <b>74</b> , <b>77</b> , <b>86</b> and <b>87</b> , determined in Raji cell lysate                                   |
| 13 | Table S9: The apparent IC <sub>50</sub> values of compounds <b>5</b> and <b>87</b> , determined in Raji cell lysate                                                                                     |
| 13 | Table S10: The apparent pIC <sub>50</sub> values of compounds <b>5</b> and <b>87</b> , determined in Raji cell lysate.                                                                                  |
| 13 | Table S11: The apparent pIC <sub>50</sub> values of compounds <b>5</b> and <b>87</b> , determined in intact RPMI-8226 cells.                                                                            |
| 14 | Table S12: The apparent pIC <sub>50</sub> values of compounds <b>5</b> and <b>87</b> , determined in Raji cell lysate                                                                                   |

- 14 Figure S8: Growth tests by dilution of WT and mutant yeast strains.
- 15 Figure S9: Stereo representations of human-yeast chimeric  $\beta$ 2 active sites in complex with ONX 0914.
- 16 Figure S10: ONX 0914 bound to mouse constitutive and immunoproteasomes.
- 18 Figure S11: The  $\gamma\beta$ 2-G45A mutant active site in complex with the proteasome inhibitors bortezomib, carfilzomib and ONX 0914.
- 19 Figure S12: Structural comparison of WT  $\gamma\beta$ 2 and  $\gamma\beta$ 2-G45A mutant active sites.
- 21 Figure S13: Stereo representations of the WT  $\gamma\beta$ 2 active site in complex with compound **5**.
- 23 Table S13: X-ray data collection and refinement statistics.
- 33 Table S14: Subunits targeted by  $\beta$ 2c and  $\beta$ 2i inhibitors in crystal soaking experiments.
- 33 Oligonucleotides used in this study.
- 34 Synthesis and characterization of compounds.
- 123 List of abbreviations.
- 123 references.
- 126 NMR-spectra of compounds **13, 39, 68, 71, 74, 77, 86, 87**.
- 135 LC-MS-spectra of compounds **13, 39, 68, 71, 74, 77, 86, 87**.

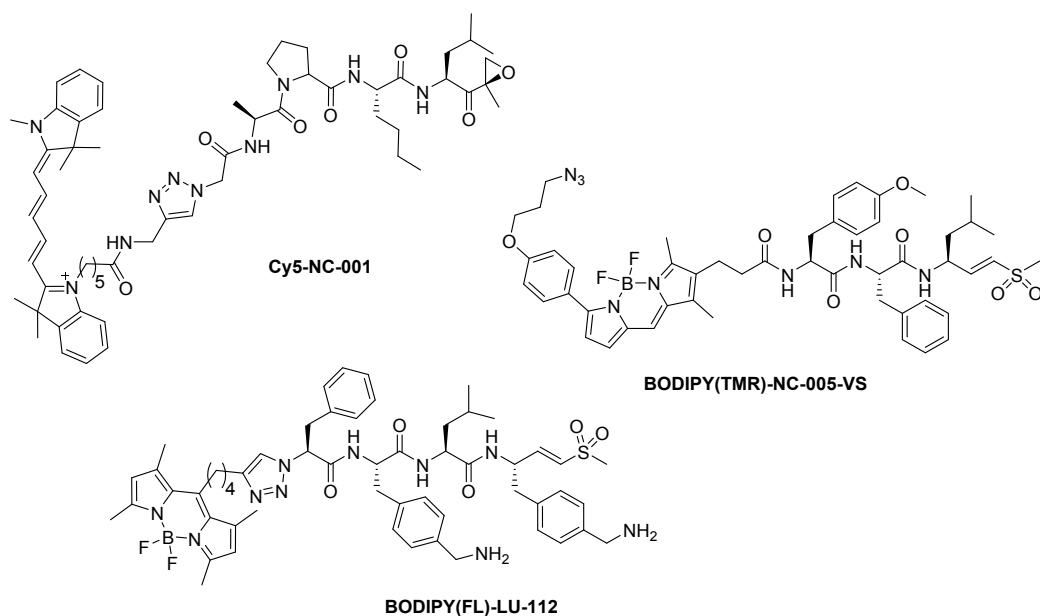

**Figure S1.** Structures of activity-based probes used.

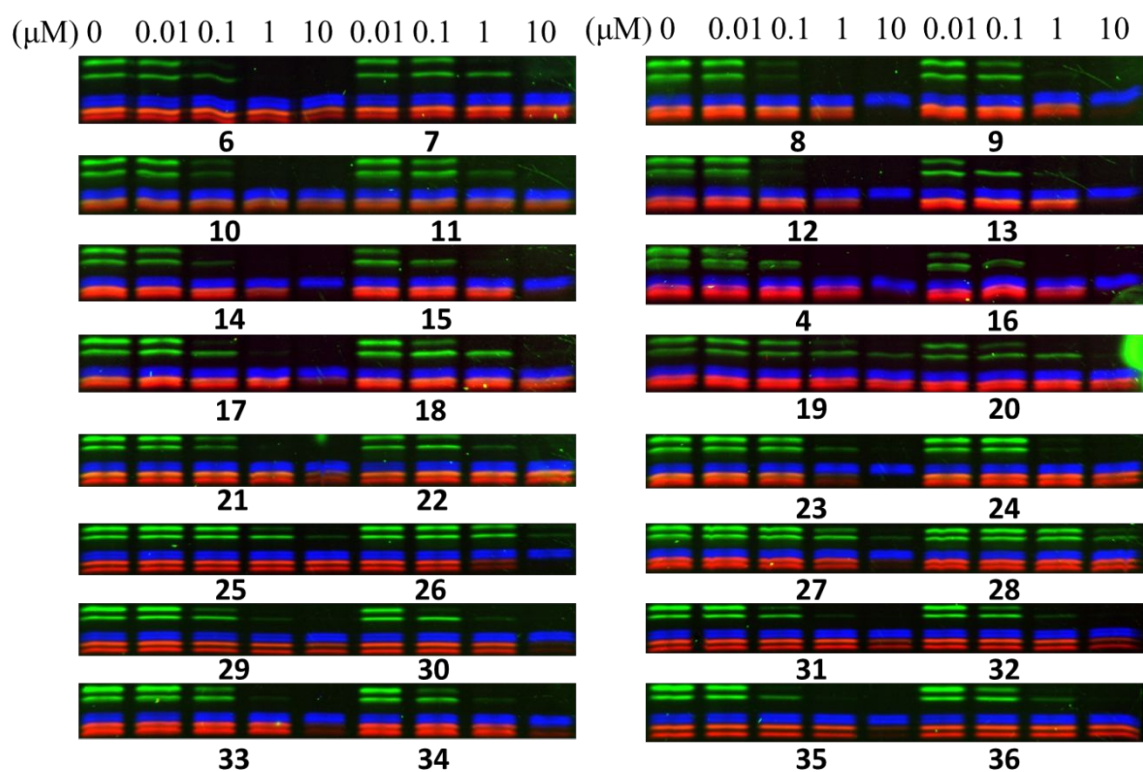

**Figure S2.** Inhibition profiles of compounds 4, 6-36, determined in Raji cell lysate.

**Table S1.** The apparent IC<sub>50</sub> (nM) values of compounds **4**, **6-36**, determined in Raji cell lysate.

| Compound           | $\beta$ 2c | $\beta$ 2i | $\beta$ 5c | $\beta$ 5i | $\beta$ 1c | $\beta$ 1i |
|--------------------|------------|------------|------------|------------|------------|------------|
| <b>6</b>           | 23         | 106        | >10000     | >10000     | >10000     | >10000     |
| <b>7</b>           | 160        | 6472       | >10000     | >10000     | >10000     | >10000     |
| <b>8</b>           | 29         | 23         | 4469       | >10000     | >10000     | >10000     |
| <b>9</b>           | 69         | 346        | 5509       | 1833       | >10000     | >10000     |
| <b>10</b>          | 32         | 47         | >10000     | >10000     | >10000     | >10000     |
| <b>11</b>          | 72         | 697        | >10000     | >10000     | >10000     | >10000     |
| <b>12</b>          | 35         | 22         | 1135       | 1301       | >10000     | >10000     |
| <b>13</b>          | 11         | 514        | 5530       | >10000     | >10000     | >10000     |
| <b>14</b>          | 17         | 47         | 883        | 2337       | >10000     | >10000     |
| <b>15</b>          | 8          | 197        | >10000     | 5219       | >10000     | >10000     |
| <b>4 (LU-002c)</b> | 10         | 316        | >10000     | >10000     | >10000     | >10000     |
| <b>16</b>          | 8          | 331        | >10000     | >10000     | >10000     | >10000     |
| <b>17</b>          | 21         | 131        | >10000     | 1834       | >10000     | >10000     |
| <b>18</b>          | 26         | 5832       | >10000     | >10000     | >10000     | >10000     |
| <b>19</b>          | 238        | 1350       | >10000     | >10000     | >10000     | >10000     |
| <b>20</b>          | 72         | >10000     | >10000     | >10000     | >10000     | >10000     |
| <b>21</b>          | 47         | 61         | 2236       | 3144       | >10000     | >10000     |
| <b>22</b>          | 18         | 537        | >10000     | >10000     | >10000     | >10000     |
| <b>23</b>          | 206        | 204        | 460        | 410        | >10000     | >10000     |
| <b>24</b>          | 383        | 322        | >10000     | >10000     | >10000     | >10000     |
| <b>25</b>          | 281        | >10000     | >10000     | >10000     | >10000     | >10000     |
| <b>26</b>          | 2250       | >10000     | 419        | 555        | >10000     | >10000     |
| <b>27</b>          | 510        | 4076       | 1944       | >10000     | >10000     | >10000     |

|           |      |        |        |        |        |        |
|-----------|------|--------|--------|--------|--------|--------|
| <b>28</b> | 3333 | >10000 | >10000 | >10000 | >10000 | >10000 |
| <b>29</b> | 35   | 259    | >10000 | >10000 | >10000 | >10000 |
| <b>30</b> | 11   | 280    | 3641   | 3974   | >10000 | >10000 |
| <b>31</b> | 31   | 202    | >10000 | >10000 | >10000 | >10000 |
| <b>32</b> | 43   | 363    | >10000 | >10000 | >10000 | >10000 |
| <b>33</b> | 41   | 174    | >10000 | >10000 | >10000 | >10000 |
| <b>34</b> | 17   | 171    | 1193   | 3222   | >10000 | >10000 |
| <b>35</b> | 16   | 45     | 1041   | >10000 | >10000 | >10000 |
| <b>36</b> | 40   | 420    | >10000 | >10000 | >10000 | >10000 |

**Table S2.** The apparent pIC<sub>50</sub> values of compounds **4**, **6-36**, determined in Raji cell lysate.

| Compound           | β2c       | β2i       | β5c       | β5i       | β1c | β1i |
|--------------------|-----------|-----------|-----------|-----------|-----|-----|
| <b>6</b>           | 7.65±0.18 | 6.97±0.10 | <5        | <5        | <5  | <5  |
| <b>7</b>           | 6.80±0.12 | 5.19±0.51 | <5        | <5        | <5  | <5  |
| <b>8</b>           | 7.57±0.17 | 7.64±0.10 | 5.35±0.39 | <5        | <5  | <5  |
| <b>9</b>           | 7.16±0.09 | 6.46±0.45 | 5.25±0.77 | 5.74±0.58 | <5  | <5  |
| <b>10</b>          | 7.50±0.14 | 7.32±0.10 | <5        | <5        | <5  | <5  |
| <b>11</b>          | 7.14±0.08 | 6.16±0.20 | <5        | <5        | <5  | <5  |
| <b>12</b>          | 7.46±0.33 | 7.66±0.15 | 5.95±0.24 | 5.89±0.03 | <5  | <5  |
| <b>13</b>          | 7.94±0.12 | 6.29±0.62 | 5.26±0.73 | <5        | <5  | <5  |
| <b>14</b>          | 7.76±0.20 | 7.33±0.08 | 6.05±0.26 | 5.63±0.48 | <5  | <5  |
| <b>15</b>          | 8.10±0.09 | 6.71±0.11 | <5        | 5.28±0.68 | <5  | <5  |
| <b>4 (LU-002c)</b> | 7.99±0.11 | 6.50±0.35 | <5        | <5        | <5  | <5  |
| <b>16</b>          | 8.10±0.09 | 6.48±0.44 | <5        | <5        | <5  | <5  |

|    |           |           |           |           |    |    |
|----|-----------|-----------|-----------|-----------|----|----|
| 17 | 7.67±0.18 | 6.88±0.04 | <5        | 5.74±0.65 | <5 | <5 |
| 18 | 7.58±0.03 | 5.23±0.42 | <5        | <5        | <5 | <5 |
| 19 | 6.62±0.08 | 5.87±0.13 | <5        | <5        | <5 | <5 |
| 20 | 7.14±0.16 | <5        | <5        | <5        | <5 | <5 |
| 21 | 7.33±0.08 | 7.22±0.21 | 5.65±0.27 | 5.50±0.23 | <5 | <5 |
| 22 | 7.74±0.21 | 6.27±0.50 | <5        | <5        | <5 | <5 |
| 23 | 6.69±0.19 | 6.69±0.25 | 6.34±0.18 | 6.39±0.25 | <5 | <5 |
| 24 | 6.42±0.43 | 6.49±0.34 | <5        | <5        | <5 | <5 |
| 25 | 6.55±0.11 | <5        | <5        | <5        | <5 | <5 |
| 26 | 5.65±0.34 | <5        | 6.38±0.04 | 6.26±0.11 | <5 | <5 |
| 27 | 6.29±0.14 | 5.39±0.21 | 5.71±0.47 | <5        | <5 | <5 |
| 28 | 5.48±0.24 | <5        | <5        | <5        | <5 | <5 |
| 29 | 7.46±0.30 | 6.59±0.25 | <5        | <5        | <5 | <5 |
| 30 | 7.97±0.03 | 6.55±0.18 | 5.44±0.36 | 5.40±0.15 | <5 | <5 |
| 31 | 7.51±0.18 | 6.70±0.09 | <5        | <5        | <5 | <5 |
| 32 | 7.37±0.11 | 6.44±0.21 | <5        | <5        | <5 | <5 |
| 33 | 7.39±0.05 | 6.76±0.13 | <5        | <5        | <5 | <5 |
| 34 | 7.76±0.04 | 6.77±0.05 | 5.92±0.56 | 5.49±0.53 | <5 | <5 |
| 35 | 7.79±0.16 | 7.35±0.14 | 5.98±0.17 | <5        | <5 | <5 |
| 36 | 7.40±0.04 | 6.38±0.09 | <5        | <5        | <5 | <5 |

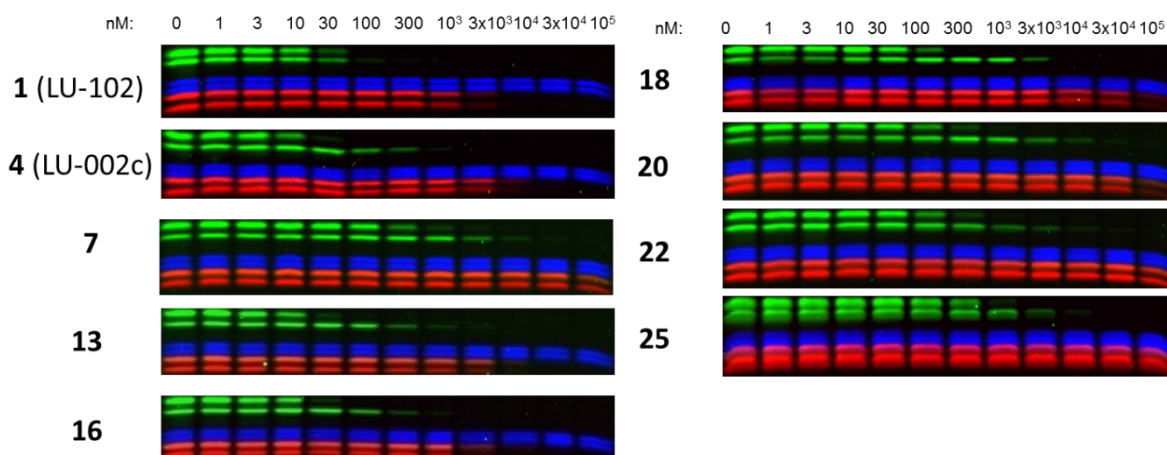

**Figure S3.** Inhibition profiles of compounds **1**, **4**, **7**, **13**, **16**, **18**, **20**, **22** and **25**, determined in Raji cell lysate.

**Table S3.** The apparent  $pIC_{50}$  values of compounds **1**, **4**, **7**, **13**, **16**, **18**, **20**, **22** and **25s**, determined in Raji cell lysate.

| Compound    | $\beta 2c$ | $\beta 2i$ | $\beta 5c$ | $\beta 5i$ | $\beta 1c$ | $\beta 1i$ |
|-------------|------------|------------|------------|------------|------------|------------|
| 1 (LU102)   | 7.88±0.09  | 7.71±0.06  | 5.88±0.11  | 5.93±0.09  | <4         | <4         |
| 4 (LU-002c) | 8.28±0.04  | 6.85±0.06  | 5.88±0.06  | 5.55±0.08  | <4         | <4         |
| 7           | 6.77±0.07  | 5.54±0.10  | <4         | <4         | <4         | <4         |
| 13          | 8.23±0.08  | 6.65±0.15  | 5.85±0.07  | 5.67±0.07  | <4         | <4         |
| 16          | 8.16±0.07  | 6.97±0.08  | 6.13±0.14  | 5.68±0.10  | <4         | <4         |
| 18          | 7.34±0.05  | 5.61±0.13  | 5.07±0.13  | 4.90±0.15  | <4         | <4         |
| 20          | 7.11±0.04  | 5.39±0.15  | 4.34±0.23  | 4.24±0.18  | <4         | <4         |
| 22          | 7.19±0.05  | 6.38±0.06  | <4         | <4         | <4         | <4         |
| 25          | 6.35±0.13  | 5.51±0.08  | <4         | <4         | <4         | <4         |



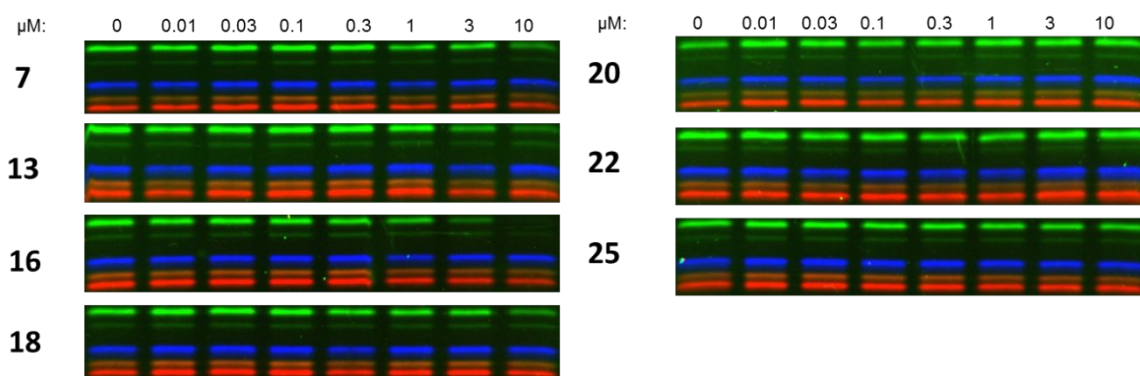

**Figure S4.** Inhibition profiles of compounds 1, 4, 7, 13, 16, 18, 20, 22 and 25, determined intact RPMI-8226 cells.

**Table S4.** The apparent  $pIC_{50}$  values of compounds 13 and 16, determined in intact RPMI-8226 cells.

| Compound | $\beta 2c$      | $\beta 2i$ | $\beta 5c$ | $\beta 5i$ | $\beta 1c$ | $\beta 1i$ |
|----------|-----------------|------------|------------|------------|------------|------------|
| 13       | $5.70 \pm 0.07$ | <5         | <5         | <5         | <5         | <5         |
| 16       | $5.90 \pm 0.07$ | <5         | <5         | <5         | <5         | <5         |

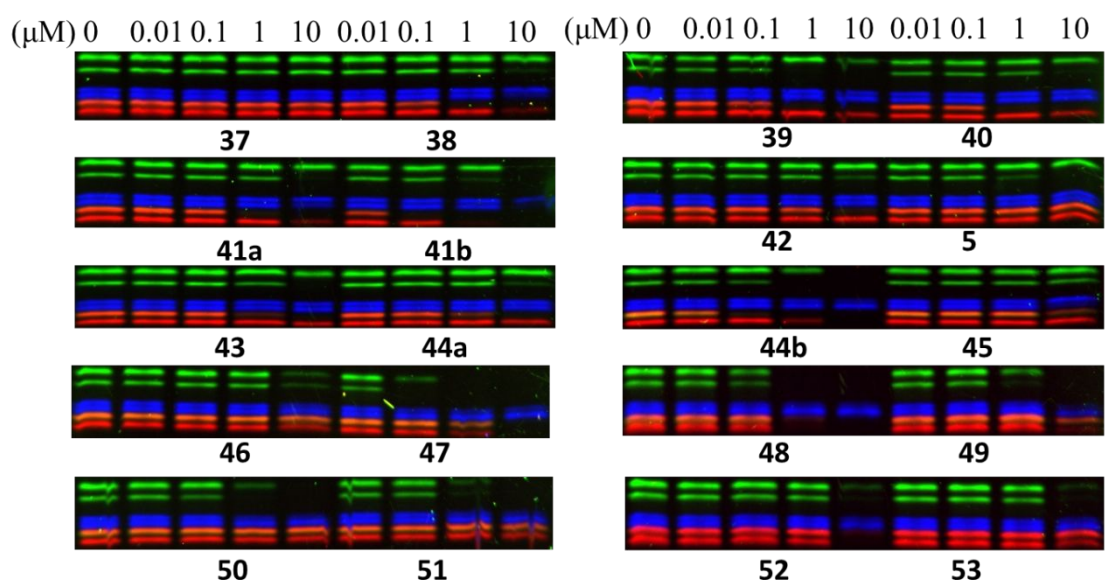

**Figure S5.** Inhibition profiles of compounds 5, 37-53, determined in Raji cell lysate.

**Table S5.** The apparent IC<sub>50</sub> (nM) values of compounds **5**, **37-53**, determined in Raji cell lysate.

| compound | β2i    | β2c    | β5i    | β5c    | β1i    | β1c    |
|----------|--------|--------|--------|--------|--------|--------|
| 37       | >10000 | >10000 | >10000 | >10000 | >10000 | >10000 |
| 38       | 5530   | >10000 | 122    | >10000 | >10000 | >10000 |
| 39       | 215    | >10000 | 126    | >10000 | >10000 | >10000 |
| 40       | 8406   | >10000 | 191    | >10000 | >10000 | >10000 |
| 41a      | 4956   | >10000 | 173    | 1742   | 2521   | >10000 |
| 41b      | 264    | 6421   | >10000 | 176    | 1412   | >10000 |
| 42       | 2764   | >10000 | 3978   | >10000 | >10000 | >10000 |
| 5        | 319    | >10000 | >10000 | >10000 | >10000 | >10000 |
| 43       | 2800   | >10000 | 375    | >10000 | >10000 | >10000 |
| 44a      | >10000 | >10000 | 399    | >10000 | >10000 | >10000 |
| 44b      | 97     | 915    | 16     | 443    | 998    | >10000 |
| 45       | >10000 | >10000 | 9678   | >10000 | >10000 | >10000 |
| 46       | 4845   | 4242   | >10000 | >10000 | >10000 | >10000 |
| 47       | 13.4   | 38.9   | >10000 | >10000 | >10000 | >10000 |
| 48       | 73     | 97     | 430    | 145    | 133    | >10000 |
| 49       | 287    | 850    | >10000 | 8106   | 761    | >10000 |
| 50       | 97     | 349    | >10000 | >10000 | >10000 | >10000 |
| 51       | 206    | 233    | >10000 | >10000 | >10000 | >10000 |
| 52       | 3615   | 2328   | >10000 | 3735   | >10000 | >10000 |
| 53       | 3116   | 1160   | >10000 | 6275   | >10000 | >10000 |

**Table S6.** The apparent pIC<sub>50</sub> values of compounds **5**, **37-53**, determined in Raji cell lysate.

| compound | β2i       | β2c | β5i       | β5c | β1i | β1c |
|----------|-----------|-----|-----------|-----|-----|-----|
| 37       | <5        | <5  | <5        | <5  | <5  | <5  |
| 38       | 5.23±0.28 | <5  | 6.92±0.13 | <5  | <5  | <5  |
| 39       | 6.67±0.23 | <5  | 6.90±0.23 | <5  | <5  | <5  |
| 40       | 5.08±0.8  | <5  | 6.72±0.27 | <5  | <5  | <5  |

|     |           |           |           |           |           |    |
|-----|-----------|-----------|-----------|-----------|-----------|----|
| 41a | 5.31±0.29 | <5        | 6.76±0.16 | 5.76±0.02 | 5.60±0.15 | <5 |
| 41b | 6.58±0.12 | 5.19±0.62 | <5        | 6.75±0.22 | 5.85±0.29 | <5 |
| 42  | 5.56±0.32 | <5        | 5.4±0.12  | <5        | <5        | <5 |
| 5   | 6.50±0.01 | <5        | <5        | <5        | <5        | <5 |
| 43  | 5.55±0.06 | <5        | 6.42±0.22 | <5        | <5        | <5 |
| 44a | <5        | <5        | 6.40±0.04 | <5        | <5        | <5 |
| 44b | 7.01±0.10 | 6.04±0.06 | 7.81±0.18 | 6.35±0.09 | 6.00±0.25 | <5 |
| 45  | <5        | <5        | 5.01±0.33 | <5        | <5        | <5 |
| 46  | 5.32±0.16 | 5.37±0.10 | <5        | <5        | <5        | <5 |
| 47  | 7.87±0.14 | 7.41±0.09 | <5        | <5        | <5        | <5 |
| 48  | 7.14±0.08 | 7.01±0.12 | 6.37±0.28 | 6.84±0.19 | 6.88±0.07 | <5 |
| 49  | 6.54±0.16 | 6.07±0.09 | <5        | 5.09±0.18 | 6.12±0.08 | <5 |
| 50  | 7.02±0.09 | 6.46±0.09 | <5        | <5        | <5        | <5 |
| 51  | 6.69±0.34 | 6.63±0.23 | <5        | <5        | <5        | <5 |
| 52  | 5.44±0.49 | 5.63±0.46 | <5        | 5.43±0.40 | <5        | <5 |
| 53  | 5.51±0.21 | 5.94±0.18 | <5        | 5.20±0.44 | <5        | <5 |

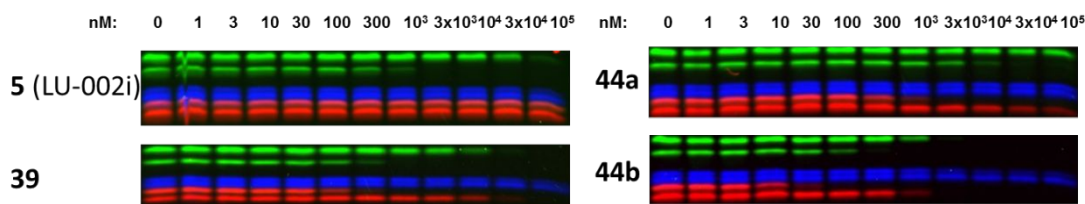

**Figure S6.** Inhibition profiles of compounds **5**, **39**, **44a** and **44b**, determined in Raji cell lysate.

**Table S7.** The apparent  $pIC_{50}$  values of compounds **5**, **39**, **44a** and **44b**, determined in Raji cell lysates.

| compound    | $\beta 2i$ | $\beta 2c$ | $\beta 5i$ | $\beta 5c$ | $\beta 1i$ | $\beta 1c$ |
|-------------|------------|------------|------------|------------|------------|------------|
| 5 (LU-002i) | 6.74±0.05  | 4.92±0.14  | <4         | <4         | <4         | <4         |
| 39          | 7.24±0.05  | 5.60±0.09  | 7.34±0.05  | 5.30±0.07  | <4         | <4         |
| 44a         | 5.48±0.10  | <4         | 6.63±0.06  | 5.13±0.15  | <4         | <4         |
| 44b         | 7.30±0.06  | 6.23±0.04  | 8.23±0.06  | 6.63±0.09  | <4         | 5.82±0.10  |

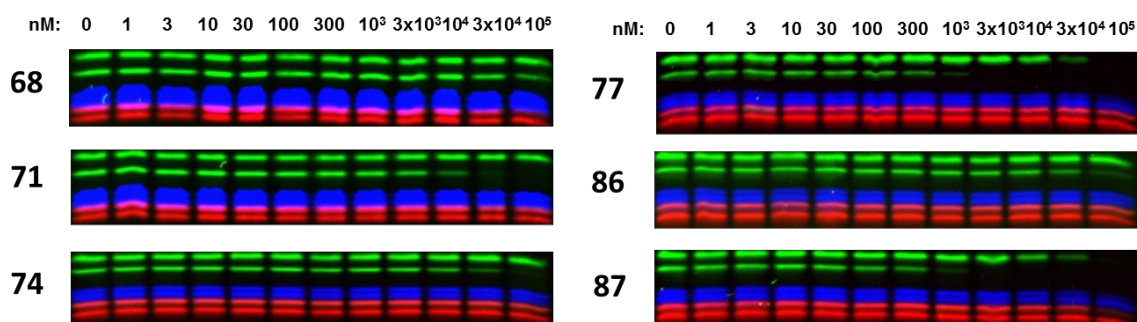

**Figure S7.** Inhibition profiles of compounds **68**, **71**, **74**, **77**, **86** and **87**, determined in Raji cell lysate.

**Table S8.** The apparent  $pIC_{50}$  values of compounds **68**, **71**, **74**, **77**, **86** and **87s**, determined in Raji cell lysates.

| compound | $\beta 2i$ | $\beta 2c$ | $\beta 5i$ | $\beta 5c$ | $\beta 1i$ | $\beta 1c$ |
|----------|------------|------------|------------|------------|------------|------------|
| 68       | <4         | <4         | <4         | <4         | <4         | <4         |
| 71       | 5.60±0.09  | <4         | <4         | <4         | <4         | <4         |
| 74       | 4.92±0.08  | <4         | <4         | <4         | <4         | <4         |
| 77       | 6.42±0.05  | 4.56±0.08  | <4         | <4         | <4         | <4         |

|    |           |           |           |    |    |           |
|----|-----------|-----------|-----------|----|----|-----------|
| 86 | 4.47±0.07 | <4        | <4        | <4 | <4 | <4        |
| 87 | 6.72±0.07 | 4.72±0.08 | 4.55±0.07 | <4 | <4 | 4.28±0.09 |

**Table S9.** The apparent IC<sub>50</sub> (μM) values of compounds **5** and **87**, determined in Raji cell lysates.

| compound    | β2i   | β2c | β5i | β5c | β1i | β1c |
|-------------|-------|-----|-----|-----|-----|-----|
| 5 (LU-002i) | 0.293 | >3  | >3  | >3  | >3  | >3  |
| 87          | 0.319 | >3  | >3  | >3  | >3  | >3  |

**Table S10.** The apparent pIC<sub>50</sub> values of compounds **5** and **87**, determined in Raji cell lysates.

| compound | β2i       | β2c   | β5i   | β5c   | β1i   | β1c   |
|----------|-----------|-------|-------|-------|-------|-------|
| 5        | 6.53±0.04 | <5.52 | <5.52 | <5.52 | <5.52 | <5.52 |
| 87       | 6.50±0.06 | <5.52 | <5.52 | <5.52 | <5.52 | <5.52 |

**Table S11.** The apparent IC<sub>50</sub> (μM) values of compounds **5** and **87**, determined intact RPMI-8226 cells.

| compound | β2i   | β2c | β5i   | β5c | β1i | β1c |
|----------|-------|-----|-------|-----|-----|-----|
| 39       | 0.124 | >10 | 0.183 | >10 | >10 | >10 |
| 87       | 0.159 | >10 | >10   | >10 | >10 | >10 |

**Table S12.** The apparent pIC<sub>50</sub> values of compounds **5** and **87**, determined intact RPMI-8226 cells.

| compound | β2i       | β2c | β5i       | β5c | β1i | β1c |
|----------|-----------|-----|-----------|-----|-----|-----|
| 39       | 6.91±0.12 | <5  | 6.74±0.11 | <5  | <5  | <5  |
| 87       | 6.80±0.14 | <5  | <5        | <5  | <5  | <5  |

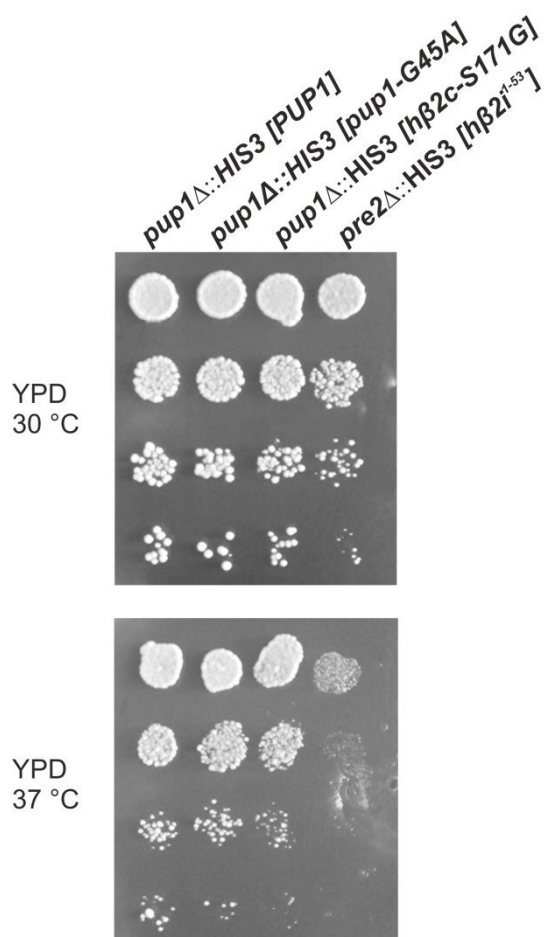

**Figure S8:** Growth tests by serial dilution of WT and mutant yeast strains. Serial dilutions of cells were spotted on YPD plates and incubated for 3 days either at 30 °C or 37 °C.

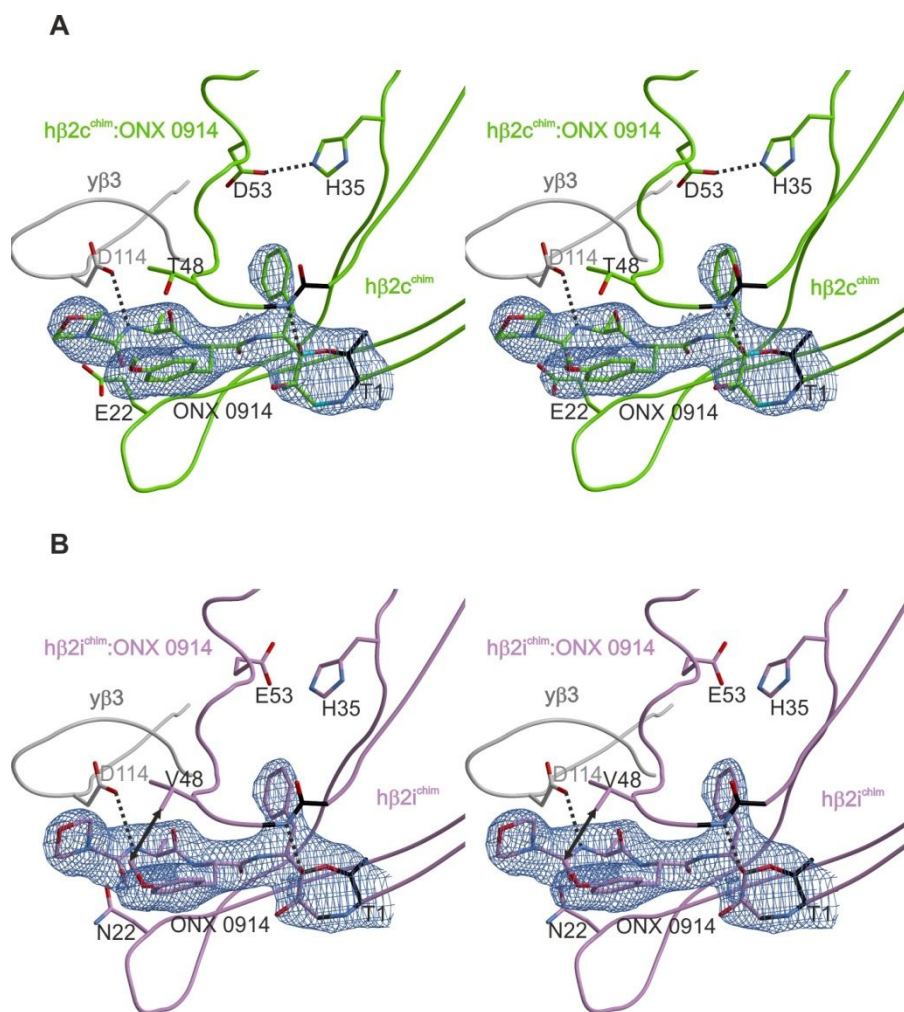

**Figure S9.** Stereo representations of human-yeast chimeric  $\beta 2$  active sites in complex with ONX 0914.  $2F_o-F_c$  electron density maps for the ligand bound to  $\beta 2c$  (green) and  $\beta 2i$  (purple) chimeric subunits respectively are shown as blue meshes contoured to  $1\sigma$ . Hydrogen bonds are depicted as black dashed lines, while hydrophobic contacts are highlighted by double arrows. PDB IDs: 6HTC ( $h\beta 2c$  chimera:ONX 0914), 6HV4 ( $h\beta 2i$  chimera:ONX 0914).



**A**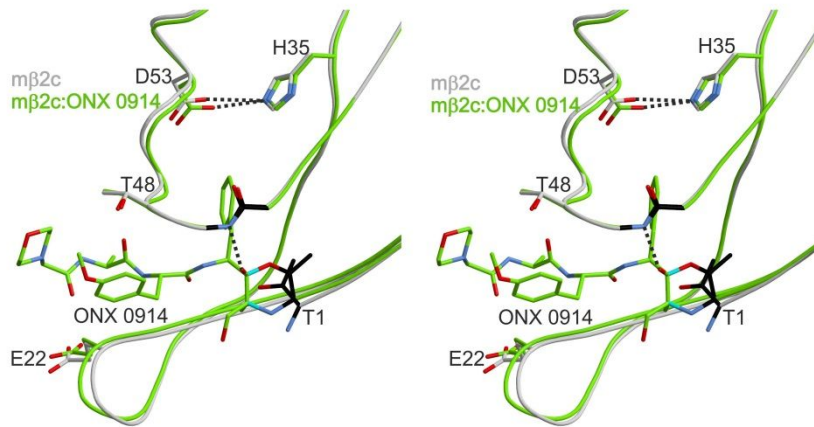**B**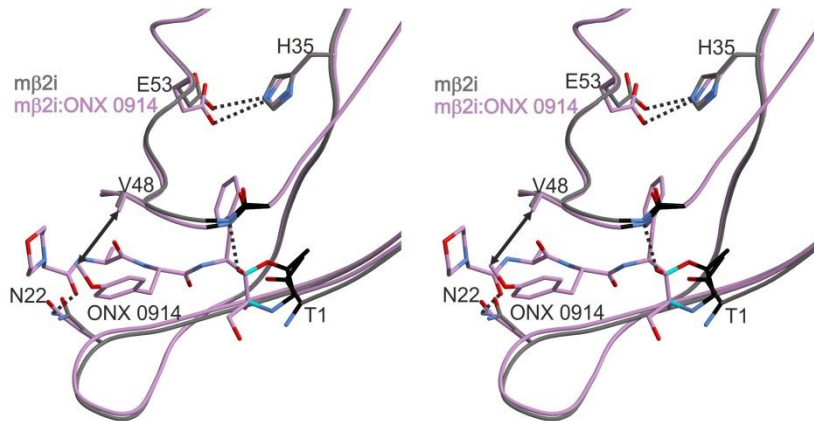**C**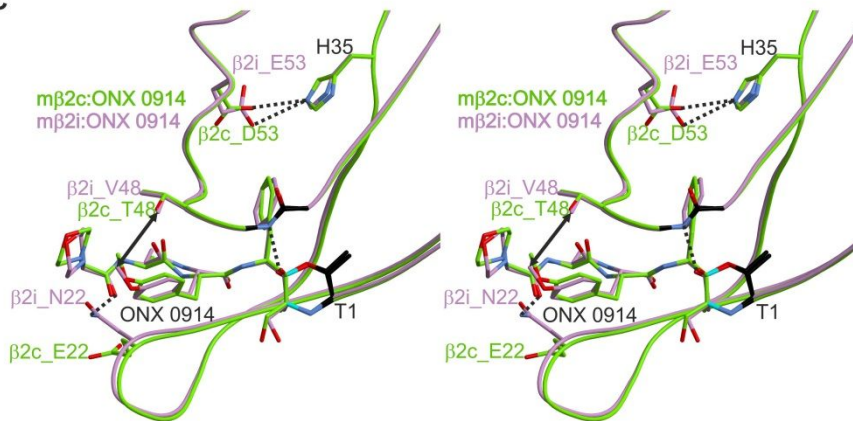**D**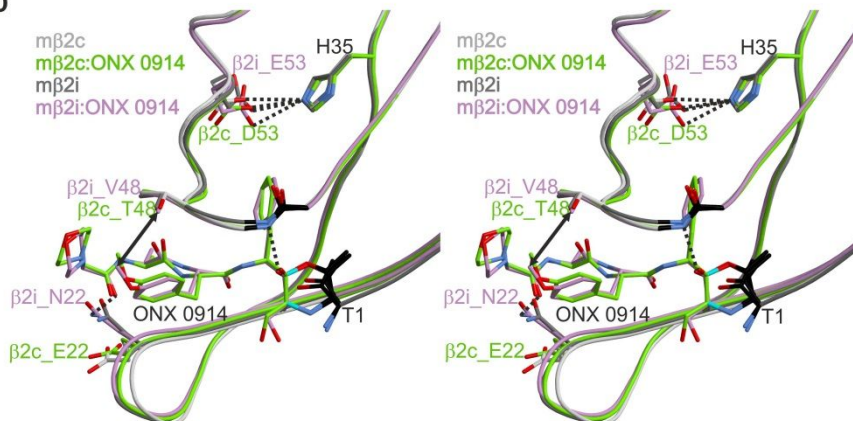



**Figure S10.** Structural superpositions of (A) the mouse  $\beta$ 2c active site in its apo and ONX 0914 bound state; (B) the mouse  $\beta$ 2i active site in its apo and ONX 0914 bound state; (C) the mouse  $\beta$ 2c and  $\beta$ 2i active sites bound to ONX 0914; (D) mouse  $\beta$ 2c and  $\beta$ 2i active sites in their ligand bound and ligand-free states shown in stereo. Color coding is according to Figure S1. Hydrogen bonds are depicted as black dashed lines, while hydrophobic contacts are highlighted by double arrows. PDB IDs: 3UNE (mouse cCP), 3UNH (mouse iCP), 3UNB (mouse cCP:ONX 0914), 3UNF (mouse iCP:ONX 0914).

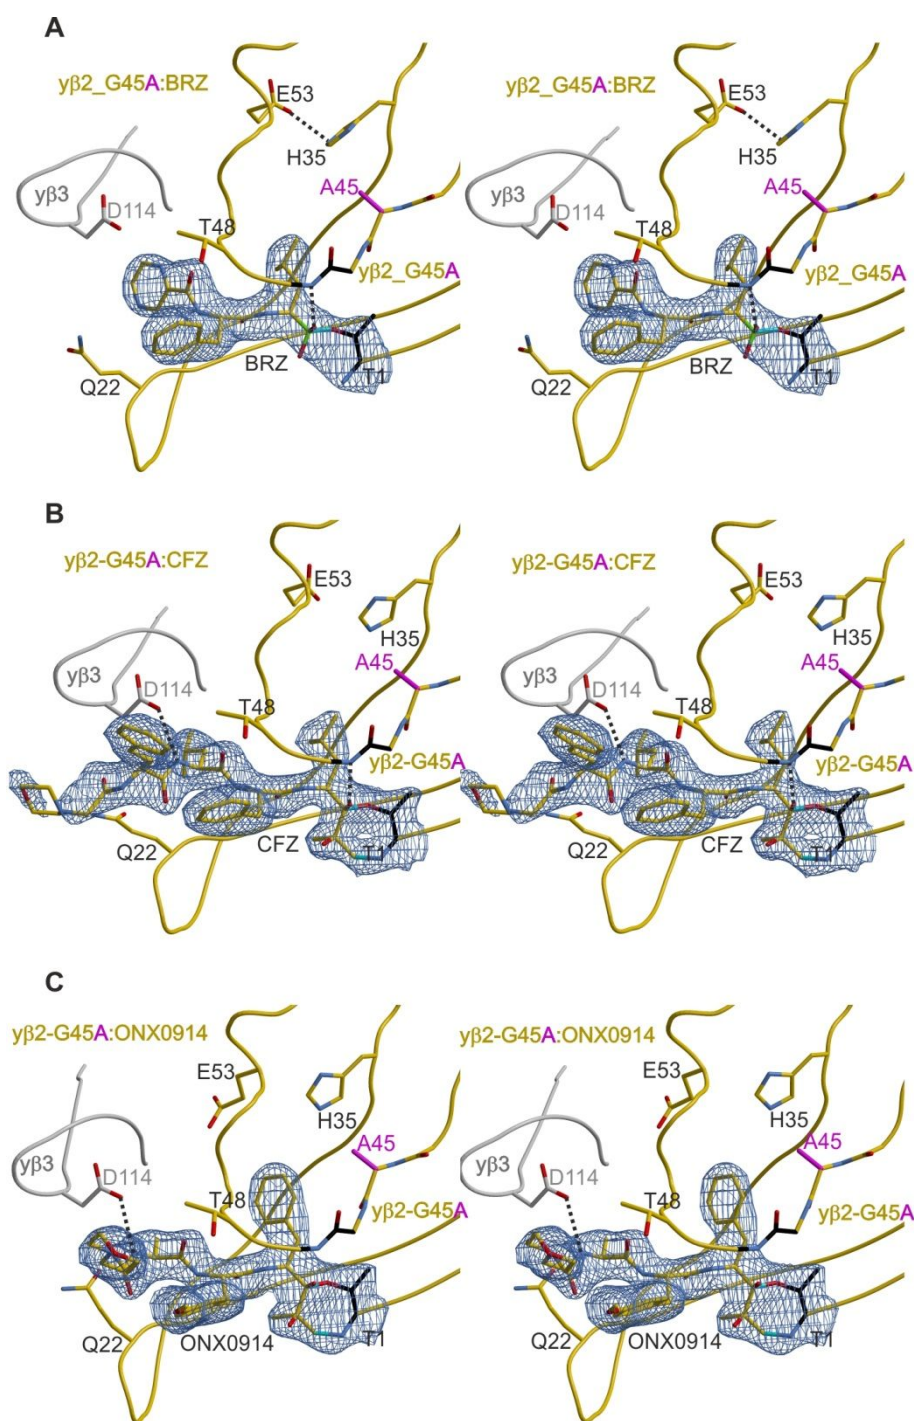

**Figure S11.** Stereo representations of the  $y\beta 2$ -G45A mutant active site in complex with the proteasome inhibitors bortezomib (BRZ, A), carfilzomib (CFZ, B) and ONX 0914 (C).  $2F_o - F_c$  electron density maps (blue meshes, contoured to  $1\sigma$ ) are displayed for the ligands and the catalytic Thr1. The site of mutation Ala45 is highlighted in magenta. Hydrogen bonds are depicted as black dashed lines. PDB IDs: 6HWD ( $y\text{CP-}\beta 2\text{G45A:bortezomib}$ ), 6HWE ( $y\text{CP-}\beta 2\text{G45A:carfilzomib}$ ), 6HWF ( $y\text{CP-}\beta 2\text{G45A:ONX 0914}$ ).

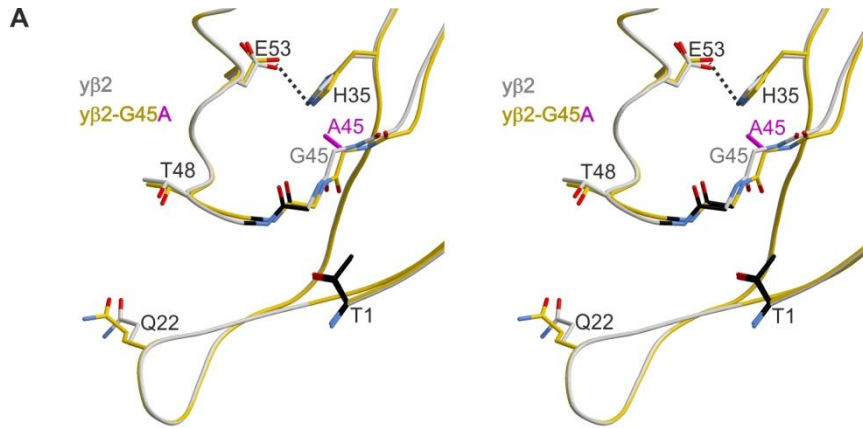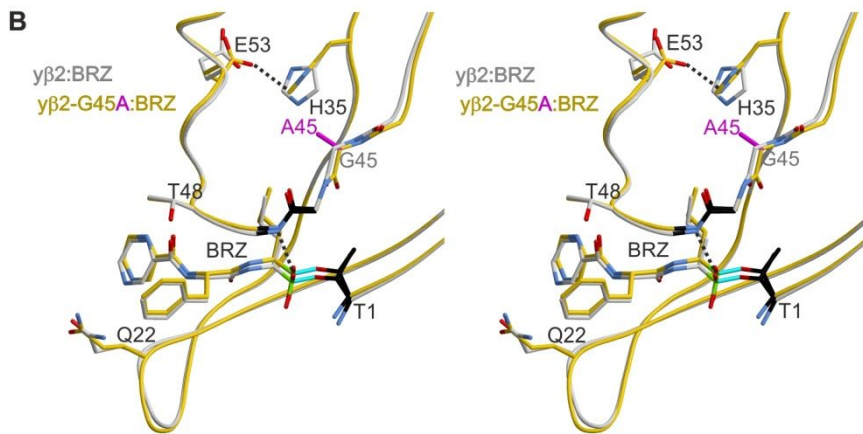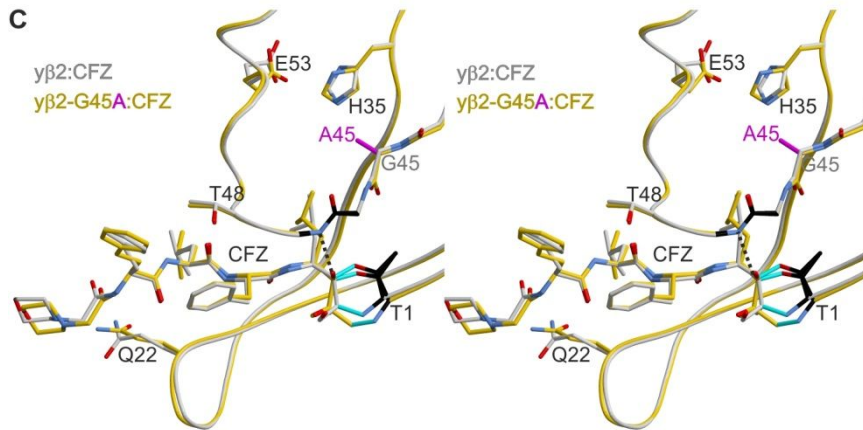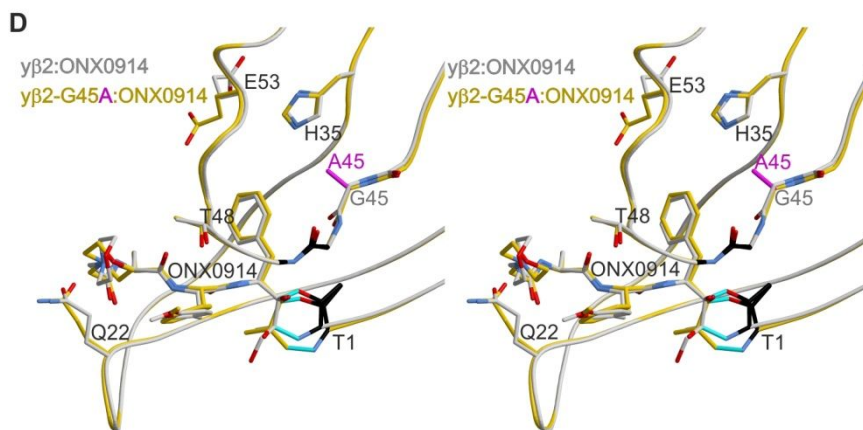

**Figure S12.** Structural superpositions of (A) the WT (PDB ID 5CZ4<sup>1</sup>) and G45A-mutant  $\gamma\beta 2$  active sites in their apo state; (B) the WT (PDB ID 4QVL<sup>2</sup>) and G45A-mutant  $\gamma\beta 2$  active sites in complex with bortezomib (BRZ); (C) the WT (PDB ID 4QW4<sup>2</sup>) and G45A-mutant  $\gamma\beta 2$  active sites in complex with carfilzomib (CFZ); (D) the WT (PDB ID 4QWX<sup>2</sup>) and G45A-mutant  $\gamma\beta 2$  active sites in complex with ONX 0914. All panels are shown in stereo. Color coding is according to Figure S4. Hydrogen bonds are depicted as black dashed lines. Ala45 does not alter the conformation of inhibitors bound to Thr1. Please note that the epoxyketone inhibitors (BRZ, CFZ) previously determined in complex with WT proteasomes have been modelled as a morpholine ring structure with Thr1, while more recent studies suggest formation of a seven-membered ring at the active site<sup>3</sup>. PDB IDs: 5CZ4 (yCP), 6HWC (yCP- $\beta 2$ G45A), 4QVL (yCP:bortezomib), 6HWD (yCP- $\beta 2$ G45A:bortezomib), 4QW4 (yCP:carfilzomib), 6HWE (yCP- $\beta 2$ G45A:carfilzomib), 4QWX (yCP:ONX 0914), 6HWF (yCP- $\beta 2$ G45A:ONX 0914).

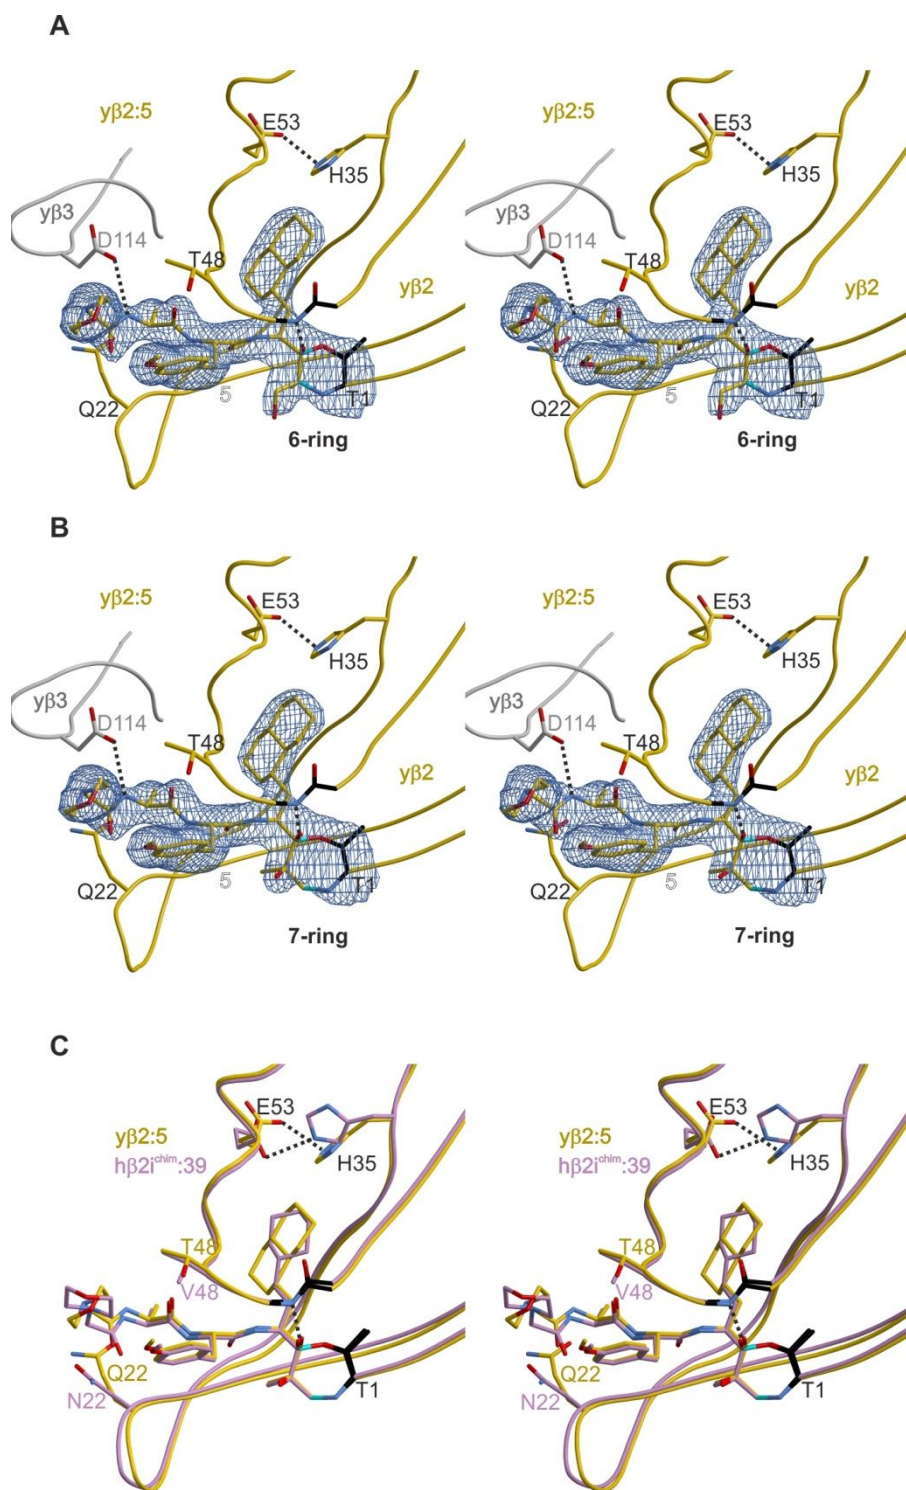

**Figure S13:** Stereo representations of the WT  $y\beta 2$  active site in complex with compound **5**. The covalent adduct of the active site Thr1 and the ligand is modelled as (A) six-membered morpholine ring and (B) seven-membered ring structure. The  $2F_{\text{O}}-F_{\text{C}}$  electron density maps (blue meshes, contoured to  $1\sigma$ ), displayed for the ligands and the catalytic Thr1, indicate that in this case the morpholine ring system fits

the experimental data better. (C) Superposition of the WT  $\gamma\beta 2$  active site in complex with the first-in-class  $\beta 2i$ -inhibitor **5** and the human-yeast chimeric  $\beta 2i$  subunit bound to the second-most selective inhibitor for  $\beta 2i$ , compound **39**. Hydrogen bonds are depicted as black dashed lines. PDB IDs: 6HVY (yCP:**5**), 6HVV (h $\beta 2i$  chimera:**39**).

**Table S13.** X-ray data collection and refinement statistics.

|                                                       | <i>hβ2c chimera</i>                                      | <i>hβ2c chimera:<br/>ONX 0914</i>                       | <i>hβ2c chimera:4</i>                                   | <i>hβ2c chimera:7</i>                                   |
|-------------------------------------------------------|----------------------------------------------------------|---------------------------------------------------------|---------------------------------------------------------|---------------------------------------------------------|
| <b>Crystal parameters</b>                             |                                                          |                                                         |                                                         |                                                         |
| Space group                                           | P2 <sub>1</sub>                                          | P2 <sub>1</sub>                                         | P2 <sub>1</sub>                                         | P2 <sub>1</sub>                                         |
| Cell constants                                        | a = 135.7 Å<br>b = 300.6 Å<br>c = 145.1 Å<br>β = 113.1 ° | a = 135.6 Å<br>b = 300.8 Å<br>c = 144.6 Å<br>β = 112.9° | a = 134.3 Å<br>b = 299.9 Å<br>c = 144.2 Å<br>β = 112.7° | a = 133.9 Å<br>b = 300.4 Å<br>c = 144.0 Å<br>β = 112.8° |
| CPs / AU <sup>a</sup>                                 | 1                                                        | 1                                                       | 1                                                       | 1                                                       |
| <b>Data collection</b>                                |                                                          |                                                         |                                                         |                                                         |
| Beam line                                             | ID23, ESRF                                               | X06SA, SLS                                              | X06SA, SLS                                              | X06SA, SLS                                              |
| Wavelength (Å)                                        | 1.0                                                      | 1.0                                                     | 1.0                                                     | 1.0                                                     |
| Resolution range (Å) <sup>b</sup>                     | 50–2.7 (2.8–2.7)                                         | 50–2.8 (2.9–2.8)                                        | 50–3.0 (3.1–3.0)                                        | 50–3.0 (3.1–3.0)                                        |
| No. observations                                      | 886780                                                   | 787101                                                  | 646229                                                  | 618990                                                  |
| No. unique reflections <sup>c</sup>                   | 288098                                                   | 256275                                                  | 206485                                                  | 199569                                                  |
| Completeness (%) <sup>b</sup>                         | 98.7 (99.7)                                              | 98.0 (98.5)                                             | 98.5 (99.5)                                             | 95.5 (97.5)                                             |
| R <sub>merge</sub> (%) <sup>b, d</sup>                | 9.0 (52.5)                                               | 9.6 (52.2)                                              | 8.2 (56.2)                                              | 8.3 (58.9)                                              |
| I/σ (I) <sup>b</sup>                                  | 10.0 (2.4)                                               | 8.4 (2.0)                                               | 11.9 (3.0)                                              | 13.2 (2.8)                                              |
| <b>Refinement (REFMAC5)</b>                           |                                                          |                                                         |                                                         |                                                         |
| Resolution range (Å)                                  | 15–2.7                                                   | 15–2.8                                                  | 15–3.0                                                  | 15–3.0                                                  |
| No. refl. working set                                 | 272120                                                   | 241898                                                  | 194640                                                  | 189590                                                  |
| No. refl. test set                                    | 14332                                                    | 12731                                                   | 10245                                                   | 9979                                                    |
| No. non hydrogen                                      | 49888                                                    | 49695                                                   | 49459                                                   | 49350                                                   |
| No. of ligand atoms                                   | -                                                        | 252                                                     | 172                                                     | 164                                                     |
| Solvent (H <sub>2</sub> O, ions, MES)                 | 944                                                      | 499                                                     | 343                                                     | 242                                                     |
| R <sub>work</sub> /R <sub>free</sub> (%) <sup>e</sup> | 19.3 / 22.0                                              | 18.0 / 21.8                                             | 17.4 / 20.1                                             | 17.7 / 20.6                                             |
| r.m.s.d. bond (Å) / angle (°) <sup>f</sup>            | 0.007 / 1.2                                              | 0.007 / 1.2                                             | 0.007 / 1.2                                             | 0.007 / 1.2                                             |
| Average B-factor (Å <sup>2</sup> )                    | 59.6                                                     | 72.4                                                    | 72.2                                                    | 81.8                                                    |
| Ramachandran Plot (%) <sup>g</sup>                    | 98.1 / 1.8 / 0.1                                         | 97.8 / 2.1 / 0.1                                        | 97.7 / 2.1 / 0.2                                        | 97.5 / 2.3 / 0.2                                        |
| PDB accession code                                    | 6HTB                                                     | 6HTC                                                    | 6HTD                                                    | 6HTP                                                    |

<sup>[a]</sup> Asymmetric unit

<sup>[b]</sup> The values in parentheses for resolution range, completeness, R<sub>merge</sub> and I/σ (I) correspond to the highest resolution shell

<sup>[c]</sup> Data reduction was carried out with XDS and from a single crystal. Friedel pairs were treated as identical reflections

<sup>[d]</sup>  $R_{\text{merge}}(I) = \frac{\sum_{\text{hkl}} \sum_j |I(\text{hkl})_j - \langle I(\text{hkl}) \rangle|}{\sum_{\text{hkl}} \sum_j I(\text{hkl})_j}$ , where  $I(\text{hkl})_j$  is the  $j^{\text{th}}$  measurement of the intensity of reflection hkl and  $\langle I(\text{hkl}) \rangle$  is the average intensity

<sup>[e]</sup>  $R = \frac{\sum_{\text{hkl}} (|F_{\text{obs}}| - |F_{\text{calc}}|)}{\sum_{\text{hkl}} |F_{\text{obs}}|}$ , where R<sub>free</sub> is calculated without a sigma cut off for a randomly chosen 5% of reflections, which were not used for structure refinement, and R<sub>work</sub> is calculated for the remaining reflections

<sup>[f]</sup> Deviations from ideal bond lengths/angles

<sup>[g]</sup> Percentage of residues in favored / allowed / outlier region

|                                                       | <i>hβ2c chimera: 13</i>                                 | <i>hβ2c chimera: 16</i>                                 | <i>hβ2c chimera:18</i>                                  | <i>hβ2c chimera:20</i>                                  |
|-------------------------------------------------------|---------------------------------------------------------|---------------------------------------------------------|---------------------------------------------------------|---------------------------------------------------------|
| <b>Crystal parameters</b>                             |                                                         |                                                         |                                                         |                                                         |
| Space group                                           | P2 <sub>1</sub>                                         | P2 <sub>1</sub>                                         | P2 <sub>1</sub>                                         | P2 <sub>1</sub>                                         |
| Cell constants                                        | a = 136.4 Å<br>b = 300.5 Å<br>c = 144.8 Å<br>β = 113.4° | a = 135.2 Å<br>b = 299.4 Å<br>c = 144.8 Å<br>β = 113.1° | a = 133.9 Å<br>b = 300.4 Å<br>c = 144.0 Å<br>β = 112.6° | a = 134.0 Å<br>b = 299.3 Å<br>c = 143.5 Å<br>β = 112.2° |
| CPs / AU <sup>a</sup>                                 | 1                                                       | 1                                                       | 1                                                       | 1                                                       |
| <b>Data collection</b>                                |                                                         |                                                         |                                                         |                                                         |
| Beam line                                             | X06SA, SLS                                              | X06SA, SLS                                              | X06SA, SLS                                              | X06SA, SLS                                              |
| Wavelength (Å)                                        | 1.0                                                     | 1.0                                                     | 1.0                                                     | 1.0                                                     |
| Resolution range (Å) <sup>b</sup>                     | 50-2.6 (2.7-2.6)                                        | 50-2.9 (3.0-2.9)                                        | 50-3.0 (3.1-3.0)                                        | 50-3.0 (3.1-3.0)                                        |
| No. observations                                      | 945971                                                  | 710568                                                  | 637428                                                  | 635019                                                  |
| No. unique reflections <sup>c</sup>                   | 317160                                                  | 230576                                                  | 205059                                                  | 206139                                                  |
| Completeness (%) <sup>b</sup>                         | 97.0 (99.3)                                             | 98.8 (99.4)                                             | 98.4 (99.4)                                             | 98.9 (99.6)                                             |
| R <sub>merge</sub> (%) <sup>b, d</sup>                | 7.1 (51.0)                                              | 9.8 (56.0)                                              | 9.1 (59.6)                                              | 9.1 (55.9)                                              |
| I/σ (I) <sup>b</sup>                                  | 9.9 (2.0)                                               | 8.2 (2.0)                                               | 10.6 (2.5)                                              | 10.9 (2.0)                                              |
| <b>Refinement (REFMAC5)</b>                           |                                                         |                                                         |                                                         |                                                         |
| Resolution range (Å)                                  | 15-2.6                                                  | 15-2.9                                                  | 15-3.0                                                  | 15-3.0                                                  |
| No. refl. working set                                 | 299769                                                  | 217469                                                  | 193322                                                  | 194272                                                  |
| No. refl. test set                                    | 15777                                                   | 11445                                                   | 10174                                                   | 10224                                                   |
| No. non hydrogen                                      | 49891                                                   | 49735                                                   | 49488                                                   | 49393                                                   |
| No. of ligand atoms                                   | 176                                                     | 180                                                     | 168                                                     | 160                                                     |
| Solvent (H <sub>2</sub> O, ions, MES)                 | 705                                                     | 611                                                     | 376                                                     | 289                                                     |
| R <sub>work</sub> /R <sub>free</sub> (%) <sup>e</sup> | 19.4 / 22.4                                             | 18.4 / 21.2                                             | 18.1 / 21.8                                             | 17.8 / 20.7                                             |
| r.m.s.d. bond (Å) / angle (°) <sup>f</sup>            | 0.007 / 1.2                                             | 0.007 / 1.2                                             | 0.007 / 1.2                                             | 0.007 / 1.2                                             |
| Average B-factor (Å <sup>2</sup> )                    | 67.8                                                    | 65.6                                                    | 71.9                                                    | 78.2                                                    |
| Ramachandran Plot (%) <sup>g</sup>                    | 97.8 / 2.0 / 0.2                                        | 97.8 / 2.0 / 0.2                                        | 97.6 / 2.2 / 0.2                                        | 97.6 / 2.2 / 0.2                                        |
| PDB accession code                                    | 6HTR                                                    | 6HUB                                                    | 6HUC                                                    | 6HUQ                                                    |

[a] Asymmetric unit

[b] The values in parentheses for resolution range, completeness, R<sub>merge</sub> and I/σ (I) correspond to the highest resolution shell

[c] Data reduction was carried out with XDS and from a single crystal. Friedel pairs were treated as identical reflections

[d]  $R_{\text{merge}}(I) = \frac{\sum_{\text{hkl}} \sum_j |I(\text{hkl})_j - \langle I(\text{hkl}) \rangle|}{\sum_{\text{hkl}} \sum_j I(\text{hkl})_j}$ , where  $I(\text{hkl})_j$  is the  $j^{\text{th}}$  measurement of the intensity of reflection hkl and  $\langle I(\text{hkl}) \rangle$  is the average intensity

[e]  $R = \frac{\sum_{\text{hkl}} (|F_{\text{obs}}| - |F_{\text{calc}}|)}{\sum_{\text{hkl}} |F_{\text{obs}}|}$ , where R<sub>free</sub> is calculated without a sigma cut off for a randomly chosen 5% of reflections, which were not used for structure refinement, and R<sub>work</sub> is calculated for the remaining reflections

[f] Deviations from ideal bond lengths/angles

[g] Percentage of residues in favored / allowed / outlier region



|                                                       | <i>hβ2c chimera: 29</i>                                 | <i>hβ2c chimera:39</i>                                  | <i>hβ2i chimera</i>                                      | <i>hβ2i chimera:<br/>ONX 0914</i>                       |
|-------------------------------------------------------|---------------------------------------------------------|---------------------------------------------------------|----------------------------------------------------------|---------------------------------------------------------|
| <b>Crystal parameters</b>                             |                                                         |                                                         |                                                          |                                                         |
| Space group                                           | P2 <sub>1</sub>                                         | P2 <sub>1</sub>                                         | P2 <sub>1</sub>                                          | P2 <sub>1</sub>                                         |
| Cell constants                                        | a = 134.7 Å<br>b = 299.6 Å<br>c = 143.6 Å<br>β = 112.4° | a = 134.1 Å<br>b = 299.9 Å<br>c = 143.5 Å<br>β = 112.7° | a = 135.4 Å<br>b = 301.7 Å<br>c = 145.0 Å<br>β = 113.1 ° | a = 135.0 Å<br>b = 298.8 Å<br>c = 143.4 Å<br>β = 112.5° |
| CPs / AU <sup>a</sup>                                 | 1                                                       | 1                                                       | 1                                                        | 1                                                       |
| <b>Data collection</b>                                |                                                         |                                                         |                                                          |                                                         |
| Beam line                                             | X06SA, SLS                                              | X06SA, SLS                                              | X06SA, SLS                                               | X06SA, SLS                                              |
| Wavelength (Å)                                        | 1.0                                                     | 1.0                                                     | 1.0                                                      | 1.0                                                     |
| Resolution range (Å) <sup>b</sup>                     | 50-2.8 (2.9-2.8)                                        | 50-3.1 (3.2-3.1)                                        | 50-2.7 (2.8-2.7)                                         | 50-3.0 (3.1-3.0)                                        |
| No. observations                                      | 785120                                                  | 576142                                                  | 879669                                                   | 642979                                                  |
| No. unique reflections <sup>c</sup>                   | 255383                                                  | 186168                                                  | 283072                                                   | 203267                                                  |
| Completeness (%) <sup>b</sup>                         | 99.1 (99.4)                                             | 98.6 (99.3)                                             | 96.9 (98.7)                                              | 97.2 (99.0)                                             |
| R <sub>merge</sub> (%) <sup>b, d</sup>                | 7.9 (58.5)                                              | 9.8 (58.2)                                              | 7.7 (49.5)                                               | 9.3 (57.3)                                              |
| I/σ (I) <sup>b</sup>                                  | 11.4 (2.0)                                              | 12.2 (2.6)                                              | 9.7 (2.5)                                                | 10.0 (3.2)                                              |
| <b>Refinement (REFMAC5)</b>                           |                                                         |                                                         |                                                          |                                                         |
| Resolution range (Å)                                  | 15-2.8                                                  | 15-3.1                                                  | 15-2.7                                                   | 15-3.0                                                  |
| No. refl. working set                                 | 242613                                                  | 175330                                                  | 267382                                                   | 191584                                                  |
| No. refl. test set                                    | 12770                                                   | 9228                                                    | 14073                                                    | 10084                                                   |
| No. non hydrogen                                      | 49573                                                   | 49440                                                   | 49998                                                    | 49736                                                   |
| No. of ligand atoms                                   | 176                                                     | 172                                                     | -                                                        | 252                                                     |
| Solvent (H <sub>2</sub> O, ions, MES)                 | 453                                                     | 232                                                     | 626                                                      | 320                                                     |
| R <sub>work</sub> /R <sub>free</sub> (%) <sup>e</sup> | 19.4 / 22.1                                             | 16.8 / 21.3                                             | 17.7 / 20.9                                              | 18.4 / 21.4                                             |
| r.m.s.d. bond (Å) / angle (°) <sup>f</sup>            | 0.007 / 1.2                                             | 0.007 / 1.2                                             | 0.007 / 1.1                                              | 0.007 / 1.2                                             |
| Average B-factor (Å <sup>2</sup> )                    | 77.3                                                    | 77.7                                                    | 62.3                                                     | 74.1                                                    |
| Ramachandran Plot (%) <sup>g</sup>                    | 97.7 / 2.1 / 0.2                                        | 97.8 / 2.1 / 0.1                                        | 98.0 / 1.9 / 0.1                                         | 97.7 / 2.2 / 0.1                                        |
| PDB accession code                                    | 6HUU                                                    | 6HUV                                                    | 6HV3                                                     | 6HV4                                                    |

[a] Asymmetric unit

[b] The values in parentheses for resolution range, completeness, R<sub>merge</sub> and I/σ (I) correspond to the highest resolution shell

[c] Data reduction was carried out with XDS and from a single crystal. Friedel pairs were treated as identical reflections

[d]  $R_{\text{merge}}(I) = \frac{\sum_{\text{hkl}} \sum_j |I(\text{hkl})_j - \langle I(\text{hkl}) \rangle|}{\sum_{\text{hkl}} \sum_j I(\text{hkl})_j}$ , where  $I(\text{hkl})_j$  is the  $j^{\text{th}}$  measurement of the intensity of reflection hkl and  $\langle I(\text{hkl}) \rangle$  is the average intensity

[e]  $R = \frac{\sum_{\text{hkl}} (|F_{\text{obs}}| - |F_{\text{calc}}|)}{\sum_{\text{hkl}} |F_{\text{obs}}|}$ , where R<sub>free</sub> is calculated without a sigma cut off for a randomly chosen 5% of reflections, which were not used for structure refinement, and R<sub>work</sub> is calculated for the remaining reflections

[f] Deviations from ideal bond lengths/angles

[g] Percentage of residues in favored / allowed / outlier region

|                                                       | <i>hβ2i chimera:4</i>                                   | <i>hβ2i chimera:7</i>                                   | <i>hβ2i chimera: 13</i>                                 | <i>hβ2i chimera: 16</i>                                 |
|-------------------------------------------------------|---------------------------------------------------------|---------------------------------------------------------|---------------------------------------------------------|---------------------------------------------------------|
| <b>Crystal parameters</b>                             |                                                         |                                                         |                                                         |                                                         |
| Space group                                           | P2 <sub>1</sub>                                         | P2 <sub>1</sub>                                         | P2 <sub>1</sub>                                         | P2 <sub>1</sub>                                         |
| Cell constants                                        | a = 134.7 Å<br>b = 300.4 Å<br>c = 144.1 Å<br>β = 112.6° | a = 134.1 Å<br>b = 302.1 Å<br>c = 143.2 Å<br>β = 112.6° | a = 134.9 Å<br>b = 300.6 Å<br>c = 144.8 Å<br>β = 112.8° | a = 135.8 Å<br>b = 299.6 Å<br>c = 144.6 Å<br>β = 113.2° |
| CPs / AU <sup>a</sup>                                 | 1                                                       | 1                                                       | 1                                                       | 1                                                       |
| <b>Data collection</b>                                |                                                         |                                                         |                                                         |                                                         |
| Beam line                                             | X06SA, SLS                                              | X06SA, SLS                                              | X06SA, SLS                                              | X06SA, SLS                                              |
| Wavelength (Å)                                        | 1.0                                                     | 1.0                                                     | 1.0                                                     | 1.0                                                     |
| Resolution range (Å) <sup>b</sup>                     | 50-3.0 (3.1-3.0)                                        | 50-3.4 (3.5-3.4)                                        | 50-2.9 (2.8-2.9)                                        | 50-2.7 (2.8-2.7)                                        |
| No. observations                                      | 660230                                                  | 407662                                                  | 736625                                                  | 873416                                                  |
| No. unique reflections <sup>c</sup>                   | 205492                                                  | 137474                                                  | 229426                                                  | 286280                                                  |
| Completeness (%) <sup>b</sup>                         | 97.6 (99.3)                                             | 95.4 (96.4)                                             | 97.9 (96.5)                                             | 98.7 (99.7)                                             |
| R <sub>merge</sub> (%) <sup>b, d</sup>                | 8.1 (57.0)                                              | 12.7 (64.7)                                             | 9.5 (59.4)                                              | 8.9 (52.9)                                              |
| I/σ (I) <sup>b</sup>                                  | 12.5 (3.2)                                              | 7.8 (2.0)                                               | 11.9 (2.6)                                              | 8.7 (2.1)                                               |
| <b>Refinement (REFMAC5)</b>                           |                                                         |                                                         |                                                         |                                                         |
| Resolution range (Å)                                  | 15-3.0                                                  | 15-3.4                                                  | 15-2.9                                                  | 15-2.7                                                  |
| No. refl. working set                                 | 193694                                                  | 129100                                                  | 216413                                                  | 270398                                                  |
| No. refl. test set                                    | 10194                                                   | 6795                                                    | 11390                                                   | 14231                                                   |
| No. non hydrogen atoms                                | 49771                                                   | 49514                                                   | 49895                                                   | 50166                                                   |
| No. of ligand atoms                                   | 172                                                     | 164                                                     | 176                                                     | 180                                                     |
| Solvent (H <sub>2</sub> O, ions, MES)                 | 259                                                     | 10                                                      | 379                                                     | 646                                                     |
| R <sub>work</sub> /R <sub>free</sub> (%) <sup>e</sup> | 17.3 / 20.4                                             | 17.4 / 22.9                                             | 18.2 / 20.8                                             | 19.1 / 21.9                                             |
| r.m.s.d. bond (Å) / angle (°) <sup>f</sup>            | 0.007 / 1.2                                             | 0.007 / 1.2                                             | 0.007 / 1.2                                             | 0.007 / 1.2                                             |
| Average B-factor (Å <sup>2</sup> )                    | 78.2                                                    | 103.1                                                   | 64.5                                                    | 68.0                                                    |
| Ramachandran Plot (%) <sup>g</sup>                    | 97.8 / 2.1 / 0.1                                        | 97.8 / 2.1 / 0.1                                        | 97.9 / 2.0 / 0.1                                        | 97.9 / 2.0 / 0.1                                        |
| PDB accession code                                    | 6HV5                                                    | 6HV7                                                    | 6HVA                                                    | 6HVR                                                    |

[a] Asymmetric unit

[b] The values in parentheses for resolution range, completeness, R<sub>merge</sub> and I/σ (I) correspond to the highest resolution shell

[c] Data reduction was carried out with XDS and from a single crystal. Friedel pairs were treated as identical reflections

[d]  $R_{\text{merge}}(I) = \frac{\sum_{\text{hkl}} \sum_j |I(\text{hkl})_j - \langle I(\text{hkl}) \rangle|}{\sum_{\text{hkl}} \sum_j I(\text{hkl})_j}$ , where  $I(\text{hkl})_j$  is the  $j^{\text{th}}$  measurement of the intensity of reflection hkl and  $\langle I(\text{hkl}) \rangle$  is the average intensity

[e]  $R = \frac{\sum_{\text{hkl}} (|F_{\text{obs}}| - |F_{\text{calc}}|)}{\sum_{\text{hkl}} |F_{\text{obs}}|}$ , where R<sub>free</sub> is calculated without a sigma cut off for a randomly chosen 5% of reflections, which were not used for structure refinement, and R<sub>work</sub> is calculated for the remaining reflections

[f] Deviations from ideal bond lengths/angles

[g] Percentage of residues in favored / allowed / outlier region

|                                                       | <i>hβ2i chimera:18</i>                                  | <i>hβ2i chimera:20</i>                                  | <i>hβ2i chimera: 29</i>                                 | <i>hβ2i chimera:39</i>                                  |
|-------------------------------------------------------|---------------------------------------------------------|---------------------------------------------------------|---------------------------------------------------------|---------------------------------------------------------|
| <b>Crystal parameters</b>                             |                                                         |                                                         |                                                         |                                                         |
| Space group                                           | P2 <sub>1</sub>                                         | P2 <sub>1</sub>                                         | P2 <sub>1</sub>                                         | P2 <sub>1</sub>                                         |
| Cell constants                                        | a = 134.1 Å<br>b = 300.6 Å<br>c = 143.5 Å<br>β = 112.8° | a = 135.6 Å<br>b = 300.1 Å<br>c = 144.5 Å<br>β = 112.9° | a = 135.3 Å<br>b = 299.5 Å<br>c = 143.9 Å<br>β = 112.4° | a = 136.1 Å<br>b = 299.4 Å<br>c = 144.5 Å<br>β = 113.1° |
| CPs / AU <sup>a</sup>                                 | 1                                                       | 1                                                       | 1                                                       | 1                                                       |
| <b>Data collection</b>                                |                                                         |                                                         |                                                         |                                                         |
| Beam line                                             | X06SA, SLS                                              | X06SA, SLS                                              | X06SA, SLS                                              | X06SA, SLS                                              |
| Wavelength (Å)                                        | 1.0                                                     | 1.0                                                     | 1.0                                                     | 1.0                                                     |
| Resolution range (Å) <sup>b</sup>                     | 50-3.1 (3.2-3.1)                                        | 50-2.9 (3.0-2.9)                                        | 50-2.9 (3.0-2.9)                                        | 50-2.7 (2.8-2.7)                                        |
| No. observations                                      | 569816                                                  | 717608                                                  | 699266                                                  | 828589                                                  |
| No. unique reflections <sup>c</sup>                   | 184642                                                  | 229119                                                  | 227714                                                  | 283962                                                  |
| Completeness (%) <sup>b</sup>                         | 97.6 (99.3)                                             | 97.7 (96.6)                                             | 97.5 (98.8)                                             | 97.8 (98.9)                                             |
| R <sub>merge</sub> (%) <sup>b, d</sup>                | 9.3 (52.3)                                              | 8.3 (47.8)                                              | 8.2 (52.8)                                              | 7.4 (59.6)                                              |
| I/σ (I) <sup>b</sup>                                  | 10.6 (2.7)                                              | 10.5 (2.4)                                              | 10.2 (2.5)                                              | 11.4 (2.1)                                              |
| <b>Refinement (REFMAC5)</b>                           |                                                         |                                                         |                                                         |                                                         |
| Resolution range (Å)                                  | 15-3.1                                                  | 15-2.9                                                  | 15-2.9                                                  | 15-2.7                                                  |
| No. refl. working set                                 | 173892                                                  | 216112                                                  | 214796                                                  | 268224                                                  |
| No. refl. test set                                    | 9153                                                    | 11374                                                   | 11305                                                   | 14118                                                   |
| No. non hydrogen atoms                                | 49747                                                   | 49844                                                   | 49892                                                   | 50097                                                   |
| No. of ligand atoms                                   | 168                                                     | 160                                                     | 176                                                     | 172                                                     |
| Solvent (H <sub>2</sub> O, ions, MES)                 | 239                                                     | 344                                                     | 376                                                     | 585                                                     |
| R <sub>work</sub> /R <sub>free</sub> (%) <sup>e</sup> | 17.6 / 20.5                                             | 17.9 / 20.6                                             | 19.0 / 22.0                                             | 18.4 / 21.9                                             |
| r.m.s.d. bond (Å) / angle (°) <sup>f</sup>            | 0.007 / 1.2                                             | 0.007 / 1.2                                             | 0.007 / 1.2                                             | 0.007 / 1.2                                             |
| Average B-factor (Å <sup>2</sup> )                    | 71.4                                                    | 67.4                                                    | 75.0                                                    | 63.8                                                    |
| Ramachandran Plot (%) <sup>g</sup>                    | 97.7 / 2.2 / 0.2                                        | 97.9 / 2.0 / 0.1                                        | 97.9 / 2.0 / 0.1                                        | 97.8 / 2.1 / 0.1                                        |
| PDB accession code                                    | 6HVS                                                    | 6HVT                                                    | 6HVU                                                    | 6HVV                                                    |

[a] Asymmetric unit

[b] The values in parentheses for resolution range, completeness, R<sub>merge</sub> and I/σ (I) correspond to the highest resolution shell

[c] Data reduction was carried out with XDS and from a single crystal. Friedel pairs were treated as identical reflections

[d]  $R_{\text{merge}}(I) = \frac{\sum_{\text{hkl}} \sum_j |I(\text{hkl})_j - \langle I(\text{hkl}) \rangle|}{\sum_{\text{hkl}} \sum_j I(\text{hkl})_j}$ , where  $I(\text{hkl})_j$  is the  $j^{\text{th}}$  measurement of the intensity of reflection hkl and  $\langle I(\text{hkl}) \rangle$  is the average intensity

[e]  $R = \frac{\sum_{\text{hkl}} (|F_{\text{obs}}| - |F_{\text{calc}}|)}{\sum_{\text{hkl}} |F_{\text{obs}}|}$ , where R<sub>free</sub> is calculated without a sigma cut off for a randomly chosen 5% of reflections, which were not used for structure refinement, and R<sub>work</sub> is calculated for the remaining reflections

[f] Deviations from ideal bond lengths/angles

[g] Percentage of residues in favored / allowed / outlier region

|                                                       | <i>hβ2i chimera:43</i>                                  | <i>yCP:4</i>                                            | <i>yCP:5</i><br><i>7- and 6-</i><br><i>membered ring</i> | <i>yCP:7</i>                                            |
|-------------------------------------------------------|---------------------------------------------------------|---------------------------------------------------------|----------------------------------------------------------|---------------------------------------------------------|
| <b>Crystal parameters</b>                             |                                                         |                                                         |                                                          |                                                         |
| Space group                                           | P2 <sub>1</sub>                                         | P2 <sub>1</sub>                                         | P2 <sub>1</sub>                                          | P2 <sub>1</sub>                                         |
| Cell constants                                        | a = 134.2 Å<br>b = 299.9 Å<br>c = 143.2 Å<br>β = 112.5° | a = 136.8 Å<br>b = 300.1 Å<br>c = 145.7 Å<br>β = 113.1° | a = 136.6 Å<br>b = 301.8 Å<br>c = 145.6 Å<br>β = 113.1°  | a = 137.3 Å<br>b = 299.7 Å<br>c = 145.4 Å<br>β = 113.4° |
| CPs / AU <sup>a</sup>                                 | 1                                                       | 1                                                       | 1                                                        | 1                                                       |
| <b>Data collection</b>                                |                                                         |                                                         |                                                          |                                                         |
| Beam line                                             | X06SA, SLS                                              | X06SA, SLS                                              | X06SA, SLS                                               | X06SA, SLS                                              |
| Wavelength (Å)                                        | 1.0                                                     | 1.0                                                     | 1.0                                                      | 1.0                                                     |
| Resolution range (Å) <sup>b</sup>                     | 50-3.0 (3.1-3.0)                                        | 50-2.8 (2.9-2.8)                                        | 50-2.7 (2.8-2.7)                                         | 50-2.8 (2.9-2.8)                                        |
| No. observations                                      | 639472                                                  | 902685                                                  | 885917                                                   | 814744                                                  |
| No. unique reflections <sup>c</sup>                   | 204830                                                  | 256585                                                  | 290007                                                   | 253749                                                  |
| Completeness (%) <sup>b</sup>                         | 98.2 (99.2)                                             | 97.0 (94.0)                                             | 97.9 (98.6)                                              | 96.1 (98.6)                                             |
| R <sub>merge</sub> (%) <sup>b, d</sup>                | 9.1 (59.2)                                              | 6.3 (42.9)                                              | 7.4 (55.2)                                               | 7.4 (54.0)                                              |
| I/σ (I) <sup>b</sup>                                  | 11.8 (2.2)                                              | 16.6 (3.9)                                              | 12.5 (2.4)                                               | 12.0 (2.6)                                              |
| <b>Refinement (REFMAC5)</b>                           |                                                         |                                                         |                                                          |                                                         |
| Resolution range (Å)                                  | 15-3.0                                                  | 15-2.8                                                  | 15-2.7                                                   | 15-2.8                                                  |
| No. refl. working set                                 | 193054                                                  | 243755                                                  | 273927                                                   | 239545                                                  |
| No. refl. test set                                    | 10161                                                   | 12830                                                   | 14418                                                    | 12608                                                   |
| No. non hydrogen atoms                                | 49804                                                   | 49813                                                   | 50046                                                    | 49856                                                   |
| No. of ligand atoms                                   | 184                                                     | 172                                                     | 92                                                       | 164                                                     |
| Solvent (H <sub>2</sub> O, ions, MES)                 | 280                                                     | 337                                                     | 578                                                      | 388                                                     |
| R <sub>work</sub> /R <sub>free</sub> (%) <sup>e</sup> | 16.5 / 20.2                                             | 18.7 / 20.6                                             | 18.1 / 21.8                                              | 17.4 / 20.6                                             |
| r.m.s.d. bond (Å) / angle (°) <sup>f</sup>            | 0.007 / 1.2                                             | 0.004 / 0.9                                             | 0.006 / 1.1                                              | 0.007 / 1.1                                             |
| Average B-factor (Å <sup>2</sup> )                    | 75.1                                                    | 63.5                                                    | 61.4                                                     | 68.0                                                    |
| Ramachandran Plot (%) <sup>g</sup>                    | 97.6 / 2.3 / 0.1                                        | 97.3 / 2.5 / 0.2                                        | 97.9 / 1.9 / 0.2                                         | 97.6 / 2.2 / 0.2                                        |
| PDB accession code                                    | 6HVW                                                    | 6HVX                                                    | 6HVY                                                     | 6HW0                                                    |

<sup>[a]</sup> Asymmetric unit

<sup>[b]</sup> The values in parentheses for resolution range, completeness, R<sub>merge</sub> and I/σ (I) correspond to the highest resolution shell

<sup>[c]</sup> Data reduction was carried out with XDS and from a single crystal. Friedel pairs were treated as identical reflections

<sup>[d]</sup>  $R_{\text{merge}}(I) = \frac{\sum_{\text{hkl}} \sum_j |I(\text{hkl})_j - \langle I(\text{hkl}) \rangle|}{\sum_{\text{hkl}} \sum_j I(\text{hkl})_j}$ , where  $I(\text{hkl})_j$  is the  $j^{\text{th}}$  measurement of the intensity of reflection hkl and  $\langle I(\text{hkl}) \rangle$  is the average intensity

<sup>[e]</sup>  $R = \frac{\sum_{\text{hkl}} (|F_{\text{obs}}| - |F_{\text{calc}}|)}{\sum_{\text{hkl}} |F_{\text{obs}}|}$ , where R<sub>free</sub> is calculated without a sigma cut off for a randomly chosen 5% of reflections, which were not used for structure refinement, and R<sub>work</sub> is calculated for the remaining reflections

<sup>[f]</sup> Deviations from ideal bond lengths/angles

<sup>[g]</sup> Percentage of residues in favored / allowed / outlier region

|                                                       | <i>yCP:13</i>                                           | <i>yCP:16</i>                                           | <i>yCP:18</i>                                           | <i>yCP:20</i>                                           |
|-------------------------------------------------------|---------------------------------------------------------|---------------------------------------------------------|---------------------------------------------------------|---------------------------------------------------------|
| <b>Crystal parameters</b>                             |                                                         |                                                         |                                                         |                                                         |
| Space group                                           | P2 <sub>1</sub>                                         | P2 <sub>1</sub>                                         | P2 <sub>1</sub>                                         | P2 <sub>1</sub>                                         |
| Cell constants                                        | a = 135.5 Å<br>b = 299.3 Å<br>c = 145.4 Å<br>β = 113.0° | a = 137.0 Å<br>b = 299.3 Å<br>c = 145.6 Å<br>β = 113.0° | a = 138.4 Å<br>b = 299.5 Å<br>c = 147.3 Å<br>β = 113.2° | a = 137.0 Å<br>b = 299.9 Å<br>c = 145.5 Å<br>β = 113.2° |
| CPs / AU <sup>a</sup>                                 | 1                                                       | 1                                                       | 1                                                       | 1                                                       |
| <b>Data collection</b>                                |                                                         |                                                         |                                                         |                                                         |
| Beam line                                             | ID30B, ESRF                                             | X06SA, SLS                                              | ID30B, ESRF                                             | X06SA, SLS                                              |
| Wavelength (Å)                                        | 1.0                                                     | 1.0                                                     | 1.0                                                     | 1.0                                                     |
| Resolution range (Å) <sup>b</sup>                     | 50-2.6 (2.7-2.6)                                        | 50-2.9 (3.0-2.9)                                        | 50-2.9 (3.0-2.9)                                        | 50-2.7 (2.8-2.7)                                        |
| No. observations                                      | 990364                                                  | 731924                                                  | 745220                                                  | 921732                                                  |
| No. unique reflections <sup>c</sup>                   | 321242                                                  | 233034                                                  | 239026                                                  | 296671                                                  |
| Completeness (%) <sup>b</sup>                         | 98.5 (99.2)                                             | 98.0 (99.5)                                             | 98.3 (99.6)                                             | 98.7 (99.7)                                             |
| R <sub>merge</sub> (%) <sup>b, d</sup>                | 6.6 (57.2)                                              | 8.5 (53.5)                                              | 6.4 (55.1)                                              | 7.1 (49.2)                                              |
| I/σ (I) <sup>b</sup>                                  | 12.3 (2.7)                                              | 11.3 (2.7)                                              | 13.8 (2.8)                                              | 11.4 (2.1)                                              |
| <b>Refinement (REFMAC5)</b>                           |                                                         |                                                         |                                                         |                                                         |
| Resolution range (Å)                                  | 15-2.6                                                  | 15-2.9                                                  | 15-2.9                                                  | 15-2.7                                                  |
| No. refl. working set                                 | 303621                                                  | 219799                                                  | 225482                                                  | 274527                                                  |
| No. refl. test set                                    | 15980                                                   | 11568                                                   | 11868                                                   | 1449                                                    |
| No. non hydrogen atoms                                | 50186                                                   | 49798                                                   | 49715                                                   | 49868                                                   |
| No. of ligand atoms                                   | 176                                                     | 180                                                     | 168                                                     | 160                                                     |
| Solvent (H <sub>2</sub> O, ions, MES)                 | 700                                                     | 314                                                     | 243                                                     | 404                                                     |
| R <sub>work</sub> /R <sub>free</sub> (%) <sup>e</sup> | 19.1 / 21.5                                             | 17.3 / 21.0                                             | 18.0 / 21.1                                             | 17.5 / 20.6                                             |
| r.m.s.d. bond (Å) / angle (°) <sup>f</sup>            | 0.006 / 1.1                                             | 0.007 / 1.1                                             | 0.007 / 1.1                                             | 0.007 / 1.2                                             |
| Average B-factor (Å <sup>2</sup> )                    | 69.0                                                    | 72.6                                                    | 87.6                                                    | 66.9                                                    |
| Ramachandran Plot (%) <sup>g</sup>                    | 97.6 / 2.2 / 0.2                                        | 97.6 / 2.2 / 0.2                                        | 97.5 / 2.3 / 0.2                                        | 97.7 / 2.1 / 0.2                                        |
| PDB accession code                                    | 6HW3                                                    | 6HW4                                                    | 6HW5                                                    | 6HW6                                                    |

[a] Asymmetric unit

[b] The values in parentheses for resolution range, completeness, R<sub>merge</sub> and I/σ (I) correspond to the highest resolution shell

[c] Data reduction was carried out with XDS and from a single crystal. Friedel pairs were treated as identical reflections

[d]  $R_{\text{merge}}(I) = \frac{\sum_{\text{hkl}} \sum_j |I(\text{hkl})_j - \langle I(\text{hkl}) \rangle|}{\sum_{\text{hkl}} \sum_j I(\text{hkl})_j}$ , where  $I(\text{hkl})_j$  is the  $j^{\text{th}}$  measurement of the intensity of reflection hkl and  $\langle I(\text{hkl}) \rangle$  is the average intensity

[e]  $R = \frac{\sum_{\text{hkl}} (|F_{\text{obs}}| - |F_{\text{calc}}|)}{\sum_{\text{hkl}} |F_{\text{obs}}|}$ , where R<sub>free</sub> is calculated without a sigma cut off for a randomly chosen 5% of reflections, which were not used for structure refinement, and R<sub>work</sub> is calculated for the remaining reflections

[f] Deviations from ideal bond lengths/angles

[g] Percentage of residues in favored / allowed / outlier region

|                                                       | <i>yCP:29</i>                                           | <i>yCP:39</i>                                           | <i>yCP:41b</i>                                          | <i>yCP:43</i>                                           |
|-------------------------------------------------------|---------------------------------------------------------|---------------------------------------------------------|---------------------------------------------------------|---------------------------------------------------------|
| <b>Crystal parameters</b>                             |                                                         |                                                         |                                                         |                                                         |
| Space group                                           | P2 <sub>1</sub>                                         | P2 <sub>1</sub>                                         | P2 <sub>1</sub>                                         | P2 <sub>1</sub>                                         |
| Cell constants                                        | a = 136.3 Å<br>b = 299.4 Å<br>c = 145.0 Å<br>β = 112.7° | a = 137.2 Å<br>b = 299.7 Å<br>c = 145.5 Å<br>β = 113.1° | a = 136.9 Å<br>b = 299.9 Å<br>c = 145.4 Å<br>β = 113.1° | a = 136.5 Å<br>b = 300.4 Å<br>c = 146.3 Å<br>β = 113.6° |
| CPs / AU <sup>a</sup>                                 | 1                                                       | 1                                                       | 1                                                       | 1                                                       |
| <b>Data collection</b>                                |                                                         |                                                         |                                                         |                                                         |
| Beam line                                             | X06SA, SLS                                              | X06SA, SLS                                              | X06SA, SLS                                              | X06SA, SLS                                              |
| Wavelength (Å)                                        | 1.0                                                     | 1.0                                                     | 1.0                                                     | 1.0                                                     |
| Resolution range (Å) <sup>b</sup>                     | 50-2.7 (2.8-2.7)                                        | 50-2.8 (2.9-2.8)                                        | 50-2.8 (2.9-2.8)                                        | 50-2.8 (2.9-2.8)                                        |
| No. observations                                      | 995443                                                  | 789628                                                  | 793875                                                  | 873523                                                  |
| No. unique reflections <sup>c</sup>                   | 290015                                                  | 255698                                                  | 257255                                                  | 260396                                                  |
| Completeness (%) <sup>b</sup>                         | 99.0 (99.3)                                             | 96.7 (94.8)                                             | 97.5 (97.3)                                             | 98.4 (98.1)                                             |
| R <sub>merge</sub> (%) <sup>b, d</sup>                | 7.7 (54.1)                                              | 7.7 (50.6)                                              | 7.4 (57.9)                                              | 8.0 (50.1)                                              |
| I/σ (I) <sup>b</sup>                                  | 10.9 (2.0)                                              | 10.6 (1.7)                                              | 12.8 (2.5)                                              | 12.7 (2.6)                                              |
| <b>Refinement (REFMAC5)</b>                           |                                                         |                                                         |                                                         |                                                         |
| Resolution range (Å)                                  | 15-2.7                                                  | 15-2.8                                                  | 15-2.8                                                  | 15-2.8                                                  |
| No. refl. working set                                 | 275514                                                  | 241316                                                  | 242842                                                  | 245757                                                  |
| No. refl. test set                                    | 14501                                                   | 12701                                                   | 12781                                                   | 12934                                                   |
| No. non hydrogen atoms                                | 49784                                                   | 49764                                                   | 49834                                                   | 49763                                                   |
| No. of ligand atoms                                   | 176                                                     | 172                                                     | 172                                                     | 92                                                      |
| Solvent (H <sub>2</sub> O, ions, MES)                 | 304                                                     | 285                                                     | 358                                                     | 367                                                     |
| R <sub>work</sub> /R <sub>free</sub> (%) <sup>e</sup> | 20.2 / 22.5                                             | 17.0 / 20.6                                             | 17.4 / 20.5                                             | 18.5 / 21.6                                             |
| r.m.s.d. bond (Å) / angle (°) <sup>f</sup>            | 0.004 / 0.9                                             | 0.006 / 1.1                                             | 0.006 / 1.1                                             | 0.006 / 1.1                                             |
| Average B-factor (Å <sup>2</sup> )                    | 77.4                                                    | 72.9                                                    | 65.5                                                    | 64.0                                                    |
| Ramachandran Plot (%) <sup>g</sup>                    | 97.5 / 2.2 / 0.3                                        | 97.6 / 2.2 / 0.2                                        | 97.5 / 2.2 / 0.3                                        | 97.6 / 2.2 / 0.2                                        |
| PDB accession code                                    | 6HW7                                                    | 6HW8                                                    | 6HW9                                                    | 6HWA                                                    |

<sup>[a]</sup> Asymmetric unit

<sup>[b]</sup> The values in parentheses for resolution range, completeness, R<sub>merge</sub> and I/σ (I) correspond to the highest resolution shell

<sup>[c]</sup> Data reduction was carried out with XDS and from a single crystal. Friedel pairs were treated as identical reflections

<sup>[d]</sup>  $R_{\text{merge}}(I) = \frac{\sum_{\text{hkl}} \sum_j |I(\text{hkl})_j - \langle I(\text{hkl}) \rangle|}{\sum_{\text{hkl}} \sum_j I(\text{hkl})_j}$ , where  $I(\text{hkl})_j$  is the  $j^{\text{th}}$  measurement of the intensity of reflection hkl and  $\langle I(\text{hkl}) \rangle$  is the average intensity

<sup>[e]</sup>  $R = \frac{\sum_{\text{hkl}} (|F_{\text{obs}}| - |F_{\text{calc}}|)}{\sum_{\text{hkl}} |F_{\text{obs}}|}$ , where R<sub>free</sub> is calculated without a sigma cut off for a randomly chosen 5% of reflections, which were not used for structure refinement, and R<sub>work</sub> is calculated for the remaining reflections

<sup>[f]</sup> Deviations from ideal bond lengths/angles

<sup>[g]</sup> Percentage of residues in favored / allowed / outlier region

|                                                       | <i>yCP:44b</i>                                          | <i>yCP-β2G45A</i>                                       | <i>yCP-β2G45A:<br/>bortezomib</i>                       | <i>yCP-β2G45A:<br/>carfilzomib</i>                      |
|-------------------------------------------------------|---------------------------------------------------------|---------------------------------------------------------|---------------------------------------------------------|---------------------------------------------------------|
| <b>Crystal parameters</b>                             |                                                         |                                                         |                                                         |                                                         |
| Space group                                           | P2 <sub>1</sub>                                         | P2 <sub>1</sub>                                         | P2 <sub>1</sub>                                         | P2 <sub>1</sub>                                         |
| Cell constants                                        | a = 136.6 Å<br>b = 299.9 Å<br>c = 145.6 Å<br>β = 113.2° | a = 135.4 Å<br>b = 301.2 Å<br>c = 144.6 Å<br>β = 113.0° | a = 135.5 Å<br>b = 300.1 Å<br>c = 144.9 Å<br>β = 113.1° | a = 136.8 Å<br>b = 300.2 Å<br>c = 145.5 Å<br>β = 113.3° |
| CPs / AU <sup>a</sup>                                 | 1                                                       | 1                                                       | 1                                                       | 1                                                       |
| <b>Data collection</b>                                |                                                         |                                                         |                                                         |                                                         |
| Beam line                                             | X06SA, SLS                                              | X06SA, SLS                                              | X06SA, SLS                                              | X06SA, SLS                                              |
| Wavelength (Å)                                        | 1.0                                                     | 1.0                                                     | 1.0                                                     | 1.0                                                     |
| Resolution range (Å) <sup>b</sup>                     | 50-2.6 (2.7-2.6)                                        | 50-2.8 (2.9-2.8)                                        | 50-2.8 (2.9-2.8)                                        | 50-2.3 (2.4-2.3)                                        |
| No. observations                                      | 976104                                                  | 766765                                                  | 772253                                                  | 1356610                                                 |
| No. unique reflections <sup>c</sup>                   | 321591                                                  | 250653                                                  | 255734                                                  | 467751                                                  |
| Completeness (%) <sup>b</sup>                         | 97.6 (98.8)                                             | 96.0 (98.6)                                             | 98.1 (98.9)                                             | 98.4 (99.1)                                             |
| R <sub>merge</sub> (%) <sup>b, d</sup>                | 7.0 (55.0)                                              | 9.1 (49.3)                                              | 8.0 (46.4)                                              | 5.3 (54.8)                                              |
| I/σ (I) <sup>b</sup>                                  | 11.3 (2.4)                                              | 9.5 (2.5)                                               | 11.0 (2.9)                                              | 15.2 (2.3)                                              |
| <b>Refinement (REFMAC5)</b>                           |                                                         |                                                         |                                                         |                                                         |
| Resolution range (Å)                                  | 15-2.6                                                  | 15-2.8                                                  | 15-2.8                                                  | 15-2.3                                                  |
| No. refl. working set                                 | 303954                                                  | 236637                                                  | 241378                                                  | 442835                                                  |
| No. refl. test set                                    | 15998                                                   | 12455                                                   | 12704                                                   | 23307                                                   |
| No. non hydrogen atoms                                | 50242                                                   | 50127                                                   | 50223                                                   | 52020                                                   |
| No. of ligand atoms                                   | 192                                                     | -                                                       | 168                                                     | 312                                                     |
| Solvent (H <sub>2</sub> O, ions, MES)                 | 746                                                     | 734                                                     | 677                                                     | 2278                                                    |
| R <sub>work</sub> /R <sub>free</sub> (%) <sup>e</sup> | 18.9 / 22.1                                             | 19.5 / 22.4                                             | 18.6 / 21.1                                             | 20.4 / 23.1                                             |
| r.m.s.d. bond (Å) / angle (°) <sup>f</sup>            | 0.006 / 1.1                                             | 0.007 / 1.1                                             | 0.007 / 1.1                                             | 0.007 / 1.2                                             |
| Average B-factor (Å <sup>2</sup> )                    | 62.9                                                    | 63.2                                                    | 64.8                                                    | 56.4                                                    |
| Ramachandran Plot (%) <sup>g</sup>                    | 97.7 / 2.1 / 0.2                                        | 98.0 / 1.9 / 0.1                                        | 97.9 / 2.0 / 0.1                                        | 98.0 / 1.9 / 0.1                                        |
| PDB accession code                                    | 6HWB                                                    | 6HWC                                                    | 6HWD                                                    | 6HWE                                                    |

[a] Asymmetric unit

[b] The values in parentheses for resolution range, completeness, R<sub>merge</sub> and I/σ (I) correspond to the highest resolution shell

[c] Data reduction was carried out with XDS and from a single crystal. Friedel pairs were treated as identical reflections

[d]  $R_{\text{merge}}(I) = \frac{\sum_{\text{hkl}} \sum_j |I(\text{hkl})_j - \langle I(\text{hkl}) \rangle|}{\sum_{\text{hkl}} \sum_j I(\text{hkl})_j}$ , where  $I(\text{hkl})_j$  is the  $j^{\text{th}}$  measurement of the intensity of reflection hkl and  $\langle I(\text{hkl}) \rangle$  is the average intensity

[e]  $R = \frac{\sum_{\text{hkl}} (|F_{\text{obs}}| - |F_{\text{calc}}|)}{\sum_{\text{hkl}} |F_{\text{obs}}|}$ , where R<sub>free</sub> is calculated without a sigma cut off for a randomly chosen 5% of reflections, which were not used for structure refinement, and R<sub>work</sub> is calculated for the remaining reflections

[f] Deviations from ideal bond lengths/angles

[g] Percentage of residues in favored / allowed / outlier region

---

**yCP-β2G45A:**  
**ONX 0914**

---

**Crystal parameters**

|                       |                                                          |
|-----------------------|----------------------------------------------------------|
| Space group           | P2 <sub>1</sub>                                          |
| Cell constants        | a = 136.6 Å<br>b = 299.7 Å<br>c = 145.1 Å<br>β = 113.4 ° |
| CPs / AU <sup>a</sup> | 1                                                        |

**Data collection**

|                                        |                  |
|----------------------------------------|------------------|
| Beam line                              | X06SA, SLS       |
| Wavelength (Å)                         | 1.0              |
| Resolution range (Å) <sup>b</sup>      | 50-2.5 (2.6-2.5) |
| No. observations                       | 1105580          |
| No. unique reflections <sup>c</sup>    | 359000           |
| Completeness (%) <sup>b</sup>          | 97.5 (99.1)      |
| R <sub>merge</sub> (%) <sup>b, d</sup> | 6.6 (59.0)       |
| I/σ (I) <sup>b</sup>                   | 12.0 (2.4)       |

**Refinement (REFMAC5)**

|                                                       |                  |
|-------------------------------------------------------|------------------|
| Resolution range (Å)                                  | 15-2.5           |
| No. refl. working set                                 | 339515           |
| No. refl. test set                                    | 17869            |
| No. non hydrogen                                      | 50768            |
| No. of ligand atoms                                   | 252              |
| Solvent (H <sub>2</sub> O, ions, MES)                 | 1086             |
| R <sub>work</sub> /R <sub>free</sub> (%) <sup>e</sup> | 18.9 / 21.6      |
| r.m.s.d. bond (Å) / angle (°) <sup>f</sup>            | 0.007 / 1.3      |
| Average B-factor (Å <sup>2</sup> )                    | 58.2             |
| Ramachandran Plot (%) <sup>g</sup>                    | 97.6 / 2.2 / 0.2 |

---

|                    |      |
|--------------------|------|
| PDB accession code | 6HWF |
|--------------------|------|

---

<sup>[a]</sup> Asymmetric unit

<sup>[b]</sup> The values in parentheses for resolution range, completeness, R<sub>merge</sub> and I/σ (I) correspond to the highest resolution shell

<sup>[c]</sup> Data reduction was carried out with XDS and from a single crystal. Friedel pairs were treated as identical reflections

<sup>[d]</sup>  $R_{\text{merge}}(I) = \frac{\sum_{\text{hkl}} \sum_j |I(\text{hkl})_j - \langle I(\text{hkl}) \rangle|}{\sum_{\text{hkl}} \sum_j I(\text{hkl})_j}$ , where  $I(\text{hkl})_j$  is the  $j^{\text{th}}$  measurement of the intensity of reflection hkl and  $\langle I(\text{hkl}) \rangle$  is the average intensity

<sup>[e]</sup>  $R = \frac{\sum_{\text{hkl}} (|F_{\text{obs}}| - |F_{\text{calc}}|)}{\sum_{\text{hkl}} |F_{\text{obs}}|}$ , where R<sub>free</sub> is calculated without a sigma cut off for a randomly chosen 5% of reflections, which were not used for structure refinement, and R<sub>work</sub> is calculated for the remaining reflections

<sup>[f]</sup> Deviations from ideal bond lengths/angles

<sup>[g]</sup> Percentage of residues in favored / allowed / outlier region



**Table S14:** Subunits targeted by  $\beta 2c$  and  $\beta 2i$  inhibitors in crystal soaking experiments.

|          | <i>wt y<math>\beta</math>1</i> | <i>wt y<math>\beta</math>2</i> | <i>wt y<math>\beta</math>5</i> | $\beta 2c$ | $\beta 2i$ |
|----------|--------------------------------|--------------------------------|--------------------------------|------------|------------|
| ONX 0914 | +                              | +                              | +                              | +          | +          |
| 4        | -                              | +                              | +                              | +          | +          |
| 5        | -                              | +                              | -                              | -          | -          |
| 7        | -                              | +                              | +                              | +          | +          |
| 13       | -                              | +                              | +                              | +          | +          |
| 16       | -                              | +                              | +                              | +          | +          |
| 18       | -                              | +                              | +                              | +          | +          |
| 20       | -                              | +                              | +                              | +          | +          |
| 29       | -                              | +                              | +                              | +          | +          |
| 39       | -                              | +                              | +                              | +          | +          |
| 41b      | -                              | +                              | +                              | n.d.       | n.d.       |
| 43       | -                              | -                              | +                              | -          | +          |
| 44b      | -                              | +                              | +                              | n.d.       | n.d.       |

**Table S15.** Oligonucleotides used in this study.

| <b>Oligonucleotide</b> | <b>Sequence 5' – 3'</b>                               |
|------------------------|-------------------------------------------------------|
| PSMB-for               | CCT GAT TGT AGA AAA TAG AAT TGA GTG AGC               |
| PSMB-rev               | GAT TTA CTA TAC TAA AAT ATA CTT AAG TTC TAT GTT TTA C |
| PUP1-prom-rev          | GCT CAC TCA ATT CTA TTT TCT ACA ATC AGG               |
| PUP1-ter-for           | GTA AAA CAT AGA ACT TAA GTA TAT TTT AGT ATA GTA AAT C |
| PUP1-Age-rev           | GGT ACC GGT GGA AGT TGC CTT AGG                       |
| pBS-uni                | TTG TAA AAC GAC GGC CAG TG                            |
| pBS-rev                | GAA ACA GCT ATG ACC ATG ATT ACG                       |
| PSMB7-S171G-for        | CTT GGG TCC GGT GGG AAC ATT GAT TTG TG                |
| PSMB7-S171G-rev        | CAA ATC AAT GTT CCC ACC GGA CCC AAG G                 |
| beta2i-129-for         | GGG ATC TGG TTC TCT AGC GGC AAT GGC TGT G             |

|                 |                                             |
|-----------------|---------------------------------------------|
| beta2i-129-rev  | CCG CTA GAG AAC CAG ATC CCA AGG CTG TAA ATG |
| beta2i-1-93-for | CAT TAT TCA GAT ACC AAG GTC ATA TTG GTG C   |
| beta2i-1-93-rev | CCT TGG TAT CTG AAT AAT GTT TGC CGT AG      |
| beta2i-1-52-for | CTG ATG CTG AGG CAG TTA CGC AGT TGA TC      |
| beta2i-1-52-rev | GCG TAA CTG CCT CAG CAT CAG CGG CTA CG      |
| y93-rev         | CAT GAC CTT GGT ACT TAA ATA GGT GCT GC      |
| 2i93-for        | TTT AAG TAC CAA GGT CAT GTT GGC GCT TC      |

### ***Synthesis and characterization of compounds.***

#### **General procedures**

All reagents were of commercial grade and used as received unless indicate otherwise. Dried solvents were stored over 4 Å molecular sieves. Column chromatography was performed on Screening Devices b.v. Silica Gel, with a particle size of 40-63 µm and pore diameter of 60 Å. TLC analysis was conducted on Merck aluminium sheets (Silica gel 60 F254). Compounds were visualized by UV absorption (254 nm), by spraying with a solution of KMnO<sub>4</sub> (20 g/L) and K<sub>2</sub>CO<sub>3</sub> (10 g/L) in water, followed by charring at ca. 150 °C. <sup>1</sup>H and <sup>13</sup>C NMR spectra were recorded on a Bruker AV-400 (400 MHz) or AV-600 (600 MHz) spectrometer. Chemical shifts are given in ppm (δ) relative to CD<sub>3</sub>OD or CDCl<sub>3</sub> as internal standard. Coupling constants are given in Hz and peak assignments are based on 2D <sup>1</sup>H COSY and <sup>13</sup>C HSQC NMR experiments. All presented <sup>13</sup>C APT spectra are proton decoupled. LC-MS analysis was performed on a Finnigan Surveyor HPLC system with a Gemini C18 50 × 4.60 mm column (detection at 200–600 nm) coupled to a Finnigan LCQ Advantage Max mass spectrometer with ESI. The applied buffers were H<sub>2</sub>O, MeCN and 1.0% TFA in H<sub>2</sub>O (0.1% TFA end concentration). Methods used are: 15 min (0→0.5 min: 10% MeCN; 0.5→10.5 min: 10% → 90% MeCN; 10.5→12.5 min: 90% MeCN; 12.5→15 min: 90% → 10% MeCN) or 12.5 min (0→0.5 min: 10% MeCN; 0.5→8.5 min: 10% → 90% MeCN; 8.5→10.5 min: 90% MeCN; 10.5→12.5 min: 90% → 10% MeCN). HRMS was recorded on a

LTQ Orbitrap (ThermoFinnigan). For reverse phase HPLC purification, an automated Gilson HPLC system equipped with a C18 semiprep column (Phenomenex Gemini C18, 5 $\mu$ m 250 $\times$ 10 mm) and a GX281 fraction collector. H-Phe(4-CH<sub>2</sub>NH<sub>2</sub>)VS<sup>4</sup>, Mop-Ala-Tyr(Me)-NHNH<sub>2</sub><sup>5</sup>, N<sub>3</sub>Phe-Phe(4-CH<sub>2</sub>NHBoc)-Leu-NHNH<sub>2</sub><sup>4</sup> were synthesized according to literature procedures.

#### **General procedure A**

Free amine (1.0 eq.) and free acid (1.2 eq.) were dissolved in DCM, followed by addition of HCTU (1.2 eq.) and DiPEA (3.5 eq.). After stirring overnight, the reaction mixture was concentrated *in vacuo* and re-dissolved in EtOAc, washed with 1M HCl (2 $\times$ ), sat. aq. NaHCO<sub>3</sub> (3 $\times$ ) and brine (in case of morpholino acetic acid coupling, no 1M HCl washing). The organic layer was dried over MgSO<sub>4</sub> and concentrated *in vacuo*. Purification by silica gel flash column chromatography yielded the target compound.

#### **General procedure B**

The appropriate Boc-protected C-terminally modified leucine derivative was dissolved in TFA and stirred for 20 min. Co-evaporation with toluene (3x) afforded the TFA-salt, which was used without further purification.

#### **General procedure C**

The starting material was dissolved in MeOH, follow by the addition of hydrazine monohydrate (30 eq.). The reaction mixture was stirred overnight at room temperature and then refluxed for 2h. The reaction mixture was concentrated *in vacuo* and co-evaporated with toluene (3x) to give the product in a quantitative yield. The product was directly used in next step without any further purification.

#### **General procedure D**

The hydrazide was dissolved in 1:1 DMF:DCM (v/v) and cooled to -30  $^{\circ}$ C. *t*BuONO (1.1 eq.) and HCl (4M solution in 1,4-dioxane, 2.8 eq.) were added, and the mixture was stirred for 3 h at -30  $^{\circ}$ C after which TLC analysis (10% MeOH/DCM, v/v) showed complete consumption of the starting material.

The epoxyketone amine or vinyl sulfone amine was added to the reaction mixture as a solution in DMF with 5.0 eq. of DiPEA and this mixture was allowed to warm up to room temperature slowly overnight. The mixture was diluted with EtOAc and washed with H<sub>2</sub>O (2x) and brine. The organic layer was dried over MgSO<sub>4</sub> and concentrated *in vacuo*.

### Standard procedures of amino acid epoxyketone synthesis

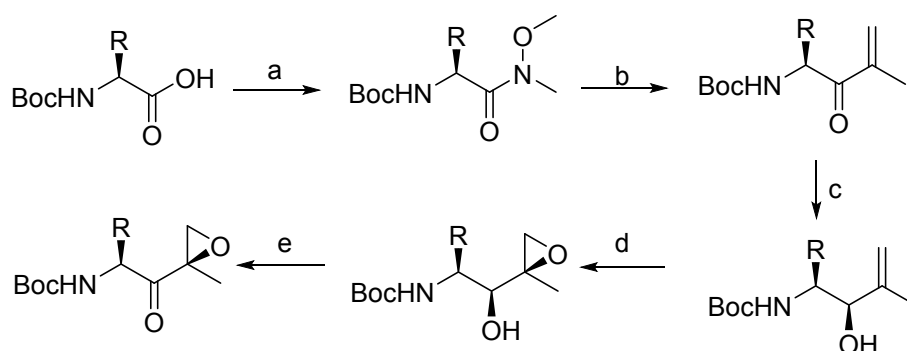

**Scheme S1.** Reagents and conditions: (a) NH(Me)OMe·HCl, HCTU, DiPEA, DCM; (b) 2-bromopropene, *t*BuLi, Et<sub>2</sub>O, -78 °C; (c) NaBH<sub>4</sub>, CeCl<sub>3</sub>·7H<sub>2</sub>O, MeOH, 0 °C; (d) *t*BuOOH, VO(acac)<sub>2</sub>, DCM, 0 °C; (e) Dess-Martin periodinane, DCM.

**General procedure E:** Boc-AA-N(OMe)Me. Boc-AA-OH (1.0 eq.) and *N,O*-dimethylhydroxylamine (2.0 eq.) are dissolved, followed by the addition of HCTU (1.2 equiv) and DiPEA (3.5 equiv). After stirring overnight, the reaction mixture was concentrated *in vacuo* and re-dissolved in EtOAc, washed with 1M HCl (2×), sat. aq. NaHCO<sub>3</sub> (3×) and brine. The organic layer was dried over MgSO<sub>4</sub> and concentrated *in vacuo*. Purification by silica gel flash column chromatography yielded the target compound.

**General procedure F:** Boc-AA-C(CH<sub>3</sub>)=CH<sub>2</sub>. A solution of 2-bromopropene (3.0 eq.) in dry Et<sub>2</sub>O was cooled down to -78 °C under argon atmosphere and stirred for 15 min before adding *t*BuLi (4.5 eq.). The reaction mixture was stirred for 15 min. The Weinreb amide was coevaporated with toluene and dissolved in dried Et<sub>2</sub>O. This solution was added dropwise to the reaction mixture during 30 min. The

resulting reaction mixture was allowed to warm up to rt and quenched after 2 h with sat. aq.  $\text{NH}_4\text{Cl}$ . The water layer was extracted with EtOAc (3 $\times$ ) and the combined organics were washed with brine, dried over  $\text{MgSO}_4$  and concentrated *in vacuo*. Purification by flash column chromatography yielded the product.

**General procedure G:** Boc-AA-OH-C(CH<sub>3</sub>)=CH<sub>2</sub>. The product obtained from last step was dissolved in methanol, followed by addition of  $\text{CeCl}_3 \cdot 7\text{H}_2\text{O}$  (1.5 eq.). After the solution turned clear, it was cooled down to 0 °C and  $\text{NaBH}_4$  (1.4 eq.) was added portion-wise. After 5 min TLC analysis indicated complete conversion and the reaction mixture was quenched with glacial AcOH. The mixture was concentrated, coevaporated with toluene, dissolved in EtOAc, washed with H<sub>2</sub>O and brine, dried over  $\text{MgSO}_4$  and concentrated *in vacuo*. Purification by column chromatography yielded the title compound.

**General procedure H:** Boc-AA-EK. The alcohol was coevaporated with toluene, dissolved in DCM and cooled down to 0 °C. After addition of  $\text{VO}(\text{acac})_2$  (0.05 eq.) the solution turned light blue-green and subsequent addition of  $\text{tBuOOH}$  (3.0 eq.) resulted in a dark brown-purple reaction mixture. After stirring for 1 h the reaction mixture was removed from the ice bath. After 15 min, the reaction mixture was concentrated *in vacuo*, dissolved in EtOAc and washed with a 1 : 1 mixture of sat. aq.  $\text{NaHCO}_3$  and H<sub>2</sub>O. The aqueous layer was extracted with EtOAc (3 $\times$ ) and the combined organics were washed with H<sub>2</sub>O and brine, dried over  $\text{MgSO}_4$  and concentrated *in vacuo* to give the crude intermediate. Dess–Martin periodinane (1.5 eq.) was dissolved in DCM and cooled down to 0 °C. The intermediate was coevaporated with toluene, dissolved in DCM and added to the Dess–Martin periodinane solution. After 1.5 h the reaction mixture was removed from the ice bath. After TLC analysis indicated full conversion of the intermediate and the reaction was quenched with sat. aq.  $\text{NaHCO}_3$ . The aqueous layer was extracted with DCM. The combined organics were washed with H<sub>2</sub>O (3 $\times$ ) and brine, dried over  $\text{MgSO}_4$  and concentrated *in vacuo*. Purification by column chromatography yielded the title compound.

Tert-butyl (S)-(1-cyclohexyl-2-(methoxy(methyl)amino)-2-oxoethyl)carbamate (**98**). This compound was prepared according to general procedure E on a 2.0 mmol scale. Purification by silica gel flash

column chromatography (5% EtOAc/pentane → 30% EtOAc/pentane) yielded the title compound (570 mg, 1.9 mmol, 95%). <sup>1</sup>H NMR (400 MHz, CDCl<sub>3</sub>) δ 5.36 (d, J = 9.8 Hz, 1H), 4.59 (t, J = 8.1 Hz, 1H), 3.78 (s, 3H), 3.21 (s, 3H), 1.87-1.51 (m, 6H), 1.43 (s, 9H), 1.32-0.95 (m, 5H). <sup>13</sup>C NMR (100 MHz, CDCl<sub>3</sub>) δ 172.55, 155.41, 78.79, 61.18, 54.12, 40.69, 31.42, 29.26, 28.00, 27.93, 25.83, 25.75, 25.65. HRMS calculated for C<sub>15</sub>H<sub>28</sub>N<sub>2</sub>O<sub>4</sub> 301.21218 [M+H]<sup>+</sup>; found 301.21222.

Tert-butyl (S)-(1-cyclohexyl-3-methyl-2-oxobut-3-en-1-yl)carbamate (**99**). This compound was prepared according to general procedure F on a 1.9 mmol scale. Purification by silica gel flash column chromatography (1% EtOAc/pentane → 10% EtOAc/pentane) yielded the title compound (365 mg, 1.3 mmol, 68%). <sup>1</sup>H NMR (500 MHz, CDCl<sub>3</sub>) δ 6.08 (s, 1H), 5.89 (d, J = 1.9 Hz, 1H), 5.29 (d, J = 9.2 Hz, 1H), 4.93-4.90 (m, 1H), 1.98-1.82 (m, 3H), 1.84-1.53 (m, 5H), 1.43 (s, 9H), 1.35-0.80 (m, 6H). <sup>13</sup>C NMR (125 MHz, CDCl<sub>3</sub>) δ 201.53, 155.75, 143.18, 126.33, 79.42, 58.20, 41.92, 30.28, 28.36, 27.63, 26.23, 26.05, 26.02, 17.69. HRMS calculated for C<sub>16</sub>H<sub>27</sub>NO<sub>3</sub> 282.20637 [M+H]<sup>+</sup>; found 282.20640.

Tert-butyl ((1S,2R)-1-cyclohexyl-2-hydroxy-3-methylbut-3-en-1-yl)carbamate (**100**). This compound was prepared according to general procedure G on a 1.3 mmol scale. Purification by silica gel flash column chromatography (5% EtOAc/pentane → 30% EtOAc/pentane) yielded the title compound (354 mg, 1.2 mmol, 92%). <sup>1</sup>H NMR (400 MHz, CDCl<sub>3</sub>) δ 4.96 (s, 1H), 4.92 (s, 1H), 4.57 (d, J = 10.1 Hz, 1H), 4.09 (d, J = 6.6 Hz, 1H), 3.67-3.61 (m, 1H), 2.51 (s, 1H), 1.90-1.54 (m, 9H), 1.42 (s, 9H), 1.30-0.87 (m, 5H). <sup>13</sup>C NMR (100 MHz, CDCl<sub>3</sub>) δ 156.38, 145.74, 112.95, 79.23, 76.68, 56.84, 37.78, 31.23, 28.44, 27.32, 26.43, 26.27, 18.33. HRMS calculated for C<sub>16</sub>H<sub>29</sub>NO<sub>3</sub> 284.22202 [M+H]<sup>+</sup>; found 284.22204.

Boc-Chg-EK (**101**). This compound was prepared according to general procedure H on a 1.2 mmol scale. Purification by silica gel flash column chromatography (2% EtOAc/pentane → 10% EtOAc/pentane) yielded the title compound (119 mg, 0.40 mmol, 33%). <sup>1</sup>H NMR (400 MHz, CDCl<sub>3</sub>) δ 5.01 (d, J = 9.4 Hz, 1H), 4.25-4.21 (m, 1H), 3.27 (d, J = 5.0 Hz, 1H), 2.87 (d, J = 5.0 Hz, 1H), 1.75-1.54 (m, 5H), 1.51 (s, 3H), 1.41 (s, 9H), 1.29-0.90 (m, 6H). <sup>13</sup>C NMR (100 MHz, CDCl<sub>3</sub>) δ 210.07, 155.70,

79.65, 59.32, 56.61, 51.79, 40.30, 30.05, 28.36, 27.88, 26.20, 26.06, 26.04, 16.41. HRMS calculated for  $C_{16}H_{27}NO_4$  298.20128  $[M+H]^+$ ; found 298.20133.  $[\alpha]_D^{20} +122$  (C=1.0,  $CHCl_3$ ).

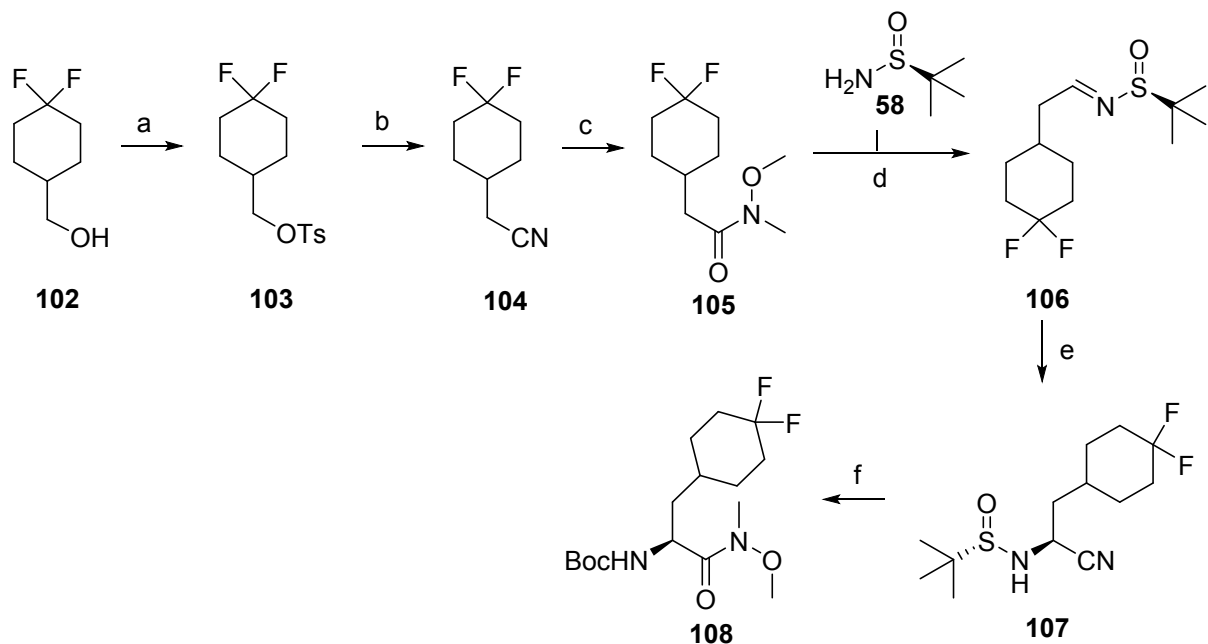

**Scheme S2.** Reagents and conditions: (a) TsCl/TEA/DCM; (b) NaCN/DMF; (c) i) KOH/ethylene glycol; ii) N,O-dimethylhydroxylamine hydrochloride, HCTU/DiPEA/DCM; (d) i)  $LiAlH_4/Et_2O$ ; ii) **58**/ $CuSO_4$ /DCM; (e)  $Et_2AlCN/i-PrOH/THF$ ; (f) i) 6M HCl, reflux; ii)  $Boc_2O/TEA/THF/H_2O$ ; iii) N,O-dimethylhydroxylamine hydrochloride, HCTU/DiPEA/DCM.

(4,4-difluorocyclohexyl)methyl 4-methylbenzenesulfonate (**103**). (4,4-difluorocyclohexyl)methanol **102** (3.0 g, 20.0 mmol) was dissolved in anhydrous DCM, followed by the addition of TsCl (7.6 g, 40 mmol, 2.0 eq.) and TEA (5.6 mL, 40 mmol, 2.0 eq.). After stirring at r.t. for 48 h, the reaction mixture was concentrated *in vacuo*. The residue was re-dissolved in EtOAc and washed with sat. aq.  $NaHCO_3$  (2 $\times$ ) and brine. The organic layer was dried over  $MgSO_4$  and concentrated *in vacuo*. Purification by silica gel flash column chromatography (2% EtOAc/pentane  $\rightarrow$  10% EtOAc/pentane) yielded the title compound (5.6 g, 18.4 mmol, 92%).  $^1H$  NMR (400 MHz,  $CDCl_3$ )  $\delta$  7.77 (d,  $J = 8.0$  Hz, 2H), 7.36 (d,  $J = 8.1$  Hz, 2H), 3.86 (d,  $J = 6.0$  Hz, 2H), 2.43 (s, 3H), 2.07-1.99 (m, 2H), 1.89-1.53 (m, 5H), 1.31-1.20 (m, 2H).  $^{13}C$  NMR (100 MHz,  $CDCl_3$ )  $\delta$  144.89, 132.56, 129.84, 127.66, 125.37, 122.99, 120.58, 73.47, 35.11, 32.80, 32.57, 32.32, 25.02, 24.93, 21.39.

2-(4,4-difluorocyclohexyl)acetonitrile (**104**). Compound **103** (5.6 g, 18.4 mmol) was dissolved in DMF, followed by the addition of NaCN (1.8 g, 36.8 mmol, 2 eq.). After refluxing overnight, the reaction mixture was diluted with EtOAc, washed with H<sub>2</sub>O (2×), sat. aq. NaHCO<sub>3</sub> (2×) and brine, dried over MgSO<sub>4</sub> and concentrated in vacuo. Purification by silica gel flash column chromatography (2% EtOAc/pentane → 10% EtOAc/pentane) yielded the title compound (2.7 g, 17.0 mmol, 92%). <sup>1</sup>H NMR (400 MHz, CDCl<sub>3</sub>) δ 2.33 (d, J = 6.7 Hz, 2H), 2.19-2.01 (m, 2H), 1.98-1.64 (m, 5H), 1.52-1.31 (m, 2H). <sup>13</sup>C NMR (100 MHz, CDCl<sub>3</sub>) δ 125.04, 122.66, 120.25, 118.19, 32.98, 32.75, 32.72, 32.64, 32.63, 32.49, 27.98, 23.04.

2-(4,4-difluorocyclohexyl)-N-methoxy-N-methylacetamide (**105**). Compound **104** (2.7 g, 17.0 mmol) was dissolved in ethylene glycol, followed by addition of KOH (7.6 mL, 136 mmol, 1 g/mL solution, 8.0 eq.). The reaction was stirred at 170 °C overnight. The reaction mixture was poured in to H<sub>2</sub>O and the pH was adjusted to 2-3 with conc. HCl. The mixture was extracted with EtOAc (3×) and the combined organic layer was washed by H<sub>2</sub>O (3×), brine, dried over MgSO<sub>4</sub> and concentrated *in vacuo*. The crude intermediate was directly coupled with N,O-dimethylhydroxylamine hydrochloride (1.2 eq.) according to general procedure E on a 17.0 mmol scale. Purification by silica gel flash column chromatography (5% EtOAc/pentane → 30% EtOAc/pentane) yielded the title compound (3.6 g, 16.1 mmol, 95%). <sup>1</sup>H NMR (400 MHz, CDCl<sub>3</sub>) δ 3.68 (s, 3H), 3.19 (s, 3H), 2.37 (d, J = 7.0 Hz, 2H), 2.16-1.66 (m, 7H), 1.38-1.26 (m, 2H). <sup>13</sup>C NMR (100 MHz, CDCl<sub>3</sub>) δ 173.19, 125.89, 123.51, 121.10, 61.26, 37.61, 33.67, 33.42, 33.20, 32.33, 32.06, 28.97. HRMS calculated for C<sub>10</sub>H<sub>17</sub>F<sub>2</sub>NO<sub>2</sub> 222.13001 [M+H]<sup>+</sup>; found 222.13002.

(S,E)-N-(2-(4,4-difluorocyclohexyl)ethylidene)-2-methylpropane-2-sulfinamide (**106**). Compound **105** (3.6 g, 16.1 mmol) was dissolved in Et<sub>2</sub>O and the reaction solution was cooled to 0 °C. LiAlH<sub>4</sub> (20.9 mL, 20.9 mmol, 1 M solution in Et<sub>2</sub>O, 1.3 eq.) was slowly added and the reaction was stirred at 0 °C for 2 h. The reaction was quenched with 0.1 M HCl and the suspension solution was filtrated. The filtrate was concentrated *in vacuo* and co-evaporated with toluene (3×). The obtained aldehyde intermediate was dissolved in anhydrous DCM, followed by the addition of (S)-2-methylpropane-2-sulfinamide 58



(2.9 g, 24.2 mmol, 1.5 eq.) and anhydrous  $\text{CuSO}_4$  (10.3 g, 64.4 mmol, 4.0 eq.). After stirring at r.t. for 48 h, the suspension solution was filtrated through Celite and concentrated *in vacuo*. Purification by silica gel flash column chromatography (2% EtOAc/pentane  $\rightarrow$  25% EtOAc/pentane) yielded the title compound (3.3 g, 12.4 mmol, 77%).  $^1\text{H}$  NMR (400 MHz,  $\text{CDCl}_3$ )  $\delta$  8.06 (t,  $J = 4.9$  Hz, 1H), 2.51-2.48 (m, 2H), 2.15-2.01 (m, 2H), 2.01-1.58 (m, 5H), 1.46-1.32 (m, 2H), 8.81 (s, 9H).  $^{13}\text{C}$  NMR (100 MHz,  $\text{CDCl}_3$ )  $\delta$  168.03, 125.35, 122.94, 120.56, 56.48, 41.75, 33.42, 33.17, 33.12, 32.91, 28.82, 28.69, 22.22. HRMS calculated for  $\text{C}^{12}\text{H}^{21}\text{F}^2\text{NOS}$  266.13847  $[\text{M}+\text{H}]^+$ ; found 266.13837.

(S)-N-((S)-1-cyano-2-(4,4-difluorocyclohexyl)ethyl)-2-methylpropane-2-sulfinamide (107).

Compound **106** (3.3 g, 12.4 mmol) was dissolved in anhydrous THF and the solution was cooled to  $-78$   $^\circ\text{C}$ .  $\text{Et}_2\text{AlCN}$  (18.6 mL, 18.6 mmol, 1M solution in toluene, 1.5 eq.) was added to anhydrous THF, followed by the addition of *i*-PrOH (2.8 mL, 37.2 mmol, 3.0 eq.). After stirring at r.t. for 15 min, this solution was slowly added to a cooled solution of compound **106** in anhydrous THF. The reaction was stirred at r.t. until TLC-MS analysis showed the complete conversion of the starting material. The reaction mixture was cooled to  $-78$   $^\circ\text{C}$  again and sat. aq.  $\text{NaHCO}_3$  (16 mL) was added. The reaction mixture was allowed to warm up to r.t. and the suspension solution was filtrated. The filtrate was concentrated *in vacuo* and purification by silica gel flash column chromatography (5% EtOAc/pentane  $\rightarrow$  50% EtOAc/pentane) yielded the title compound (3.3 g, 11.3 mmol, 91%) as a single diastereoisomer (*de* > 90%).  $^1\text{H}$  NMR (400 MHz,  $\text{CDCl}_3$ )  $\delta$  4.71 (d,  $J = 9.1$  Hz, 1H), 4.22-4.15 (m, 1H), 2.14-2.00 (m, 2H), 1.89-1.80 (m, 5H), 1.70-1.62 (m, 2H), 1.37-1.29 (m, 2H), 1.24 (s, 9H).  $^{13}\text{C}$  NMR (100 MHz,  $\text{CDCl}_3$ )  $\delta$  125.49, 123.08, 120.70, 119.66, 57.06, 44.59, 40.23, 33.04, 31.85, 28.19, 22.46. HRMS calculated for  $\text{C}_{13}\text{H}_{22}\text{F}_2\text{N}_2\text{OS}$  293.14937  $[\text{M}+\text{H}]^+$ ; found 293.14936.

(S)-tert-butyl3-(4,4-difluorocyclohexyl)-1-(methoxy(methyl)amino)-1-oxopropan-2-ylcarbamate

(108). Compound **107** (3.3 g, 11.3 mmol) was dissolved in 6M HCl and refluxed for 48 h. The mixture was co-evaporated with toluene (3 $\times$ ) to give the unprotected amino acid as the HCl salt. Subsequently, the amino acid was re-dissolved in THF/ $\text{H}_2\text{O}$  (1:1, v/v), followed by the addition of  $\text{Boc}_2\text{O}$  (5.1 g, 23.4 mmol, 1.5 eq.) and TEA (8.7 mL, 62.4 mmol, 4 eq.). After stirring overnight, the mixture was

concentrated in vacuo and re-dissolved in EtOAc. The organic layer was washed with H<sub>2</sub>O, brine, dried over MgSO<sub>4</sub> and concentrated in vacuo. Purification by silica gel flash column chromatography (10% EtOAc/pentane → 50% EtOAc/pentane with 0.1% acetic acid) yielded the crude Boc protected amino acid. The crude intermediate was directly used in peptide coupling according to general procedure E. Purification by silica gel flash column chromatography (5% EtOAc/pentane → 30% EtOAc/pentane) yielded the title compound (1.5 g, 4.3 mmol, 38%). <sup>1</sup>H NMR (400 MHz, CDCl<sub>3</sub>) δ 5.25 (d, J = 9.6 Hz, 1H), 4.84-4.66 (m, 1H), 3.78 (s, 3H), 3.20 (s, 3H), 2.13-1.94 (m, 3H), 1.80-1.51 (m, 5H), 1.44 (s, 9H), 1.36-1.18 (m, 3H). <sup>13</sup>C NMR (100 MHz, CDCl<sub>3</sub>) δ 173.29, 155.68, 125.90, 123.52, 121.11, 79.57, 61.57, 48.48, 38.94, 33.67, 33.48, 33.25, 33.00, 32.16, 29.68, 29.59, 28.29, 27.86, 27.77. HRMS calculated for C<sub>16</sub>H<sub>28</sub>F<sub>2</sub>N<sub>2</sub>O<sub>4</sub> 351.20899 [M+H]<sup>+</sup>; found 351.20898.

(S)-Tert-butyl 1-(4,4-difluorocyclohexyl)-4-methyl-3-oxopent-4-en-2-ylcarbamate (**109**). This compound was prepared according to general procedure F on a 0.68 mmol scale. Purification by silica gel flash column chromatography (1% EtOAc/pentane → 10% EtOAc/pentane) yielded the title compound (157 mg, 0.47 mmol, 69%). <sup>1</sup>H NMR (400 MHz, CDCl<sub>3</sub>) δ 6.06 (s, 1H), 5.91 (d, J = 1.8 Hz, 1H), 5.30 (d, J = 8.9 Hz, 1H), 5.23-5.02 (m, 1H), 2.18-1.97 (m, 3H), 1.90 (s, 3H), 1.75-1.56 (m, 4H), 1.44 (s, 9H), 1.39-1.22 (m, 4H). <sup>13</sup>C NMR (100 MHz, CDCl<sub>3</sub>) δ 200.99, 155.65, 142.15, 126.41, 125.88, 123.50, 121.10, 79.80, 52.09, 40.36, 33.80, 33.55, 33.38, 33.15, 32.53, 29.86, 29.76, 28.35, 28.12, 28.02, 17.84. HRMS calculated for C<sub>17</sub>H<sub>27</sub>F<sub>2</sub>NO<sub>3</sub> 332.20318 [M+H]<sup>+</sup>; found 332.20319.

Tert-butyl(2S,3R)-1-(4,4-difluorocyclohexyl)-3-hydroxy-4-methylpent-4-en-2-ylcarbamate (**110**). This compound was prepared according to general procedure G on a 0.47 mmol scale. Purification by silica gel flash column chromatography (5% EtOAc/pentane → 30% EtOAc/pentane) yielded the title compound (133 mg, 0.40 mmol, 85%). <sup>1</sup>H NMR (400 MHz, CDCl<sub>3</sub>) δ 5.04 (s, 1H), 4.95-4.94 (m, 1H), 4.92-4.83 (m, 1H), 4.18-4.05 (m, 1H), 3.94-3.76 (m, 1H), 2.66 (s, 1H), 2.13-1.93 (m, 3H), 1.75 (d, J = 6.3 Hz, 3H), 1.70-1.61 (m, 2H), 1.50-1.35 (m, 11H), 1.35-1.25 (m, 4H). <sup>13</sup>C NMR (100 MHz, CDCl<sub>3</sub>) δ 156.08, 144.83, 126.19, 123.81, 121.41, 112.01, 111.47, 79.56, 77.68, 50.19, 34.21, 33.95, 33.69, 33.44,

33.20, 32.38, 30.25, 30.15, 28.46, 27.98, 27.89, 19.43. HRMS calculated for  $C_{17}H_{29}F_2NO_3$  334.21883  $[M+H]^+$ ; found 334.21889.

Boc-Cha(4,4-2F)-EK (**111**). This compound was prepared according to general procedure H on a 0.40 mmol scale. Purification by silica gel flash column chromatography (2% EtOAc/pentane  $\rightarrow$  10% EtOAc/pentane) yielded the title compound (40 mg, 0.12 mmol, 30%).  $^1H$  NMR (400 MHz,  $CDCl_3$ )  $\delta$  4.93 (d,  $J = 9.2$  Hz, 1H), 4.36-4.31 (m, 1H), 3.26 (d,  $J = 4.9$  Hz, 1H), 2.90 (d,  $J = 4.9$  Hz, 1H), 2.19-1.89 (m, 3H), 1.80-1.59 (m, 4H), 1.55 (s, 3H), 1.42 (s, 9H), 1.37-1.13 (m, 4H).  $^{13}C$  NMR (100 MHz,  $CDCl_3$ )  $\delta$  209.26, 155.74, 125.96, 123.56, 121.18, 80.12, 59.06, 52.46, 51.00, 37.74, 33.77, 33.51, 33.29, 33.03, 32.65, 29.85, 29.76, 28.41, 27.85, 27.76, 16.83. HRMS calculated for  $C_{17}H_{27}F_2NO_4$  348.19809  $[M+H]^+$ ; found 348.19812.  $[\alpha]_D^{20} +80$  (C 0.5,  $CHCl_3$ ).

Tert-butyl (S)-(4-cyclohexyl-1-(methoxy(methyl)amino)-1-oxobutan-2-yl)carbamate (**112**). Boc-HomoCha-OH was prepared according to literature procedures<sup>6</sup>, followed by the peptide coupling according to general procedure E on a 2.1 mmol scale. Purification by silica gel flash column chromatography (5% EtOAc/pentane  $\rightarrow$  30% EtOAc/pentane) yielded the title compound (588 mg, 1.8 mmol, 86%).  $^1H$  NMR (400 MHz,  $CDCl_3$ )  $\delta$  5.37 (d,  $J = 9.2$  Hz, 1H), 4.66-4.61 (m, 1H), 3.78 (s, 3H), 3.20 (s, 3H), 1.79-1.69 (m, 6H), 1.43 (s, 9H), 1.30-1.08 (m, 7H), 0.99-0.80 (m, 2H).  $^{13}C$  NMR (100 MHz,  $CDCl_3$ )  $\delta$  173.14, 155.34, 78.92, 61.25, 50.32, 37.08, 33.13, 32.71, 32.61, 29.81, 29.36, 28.08, 26.34, 26.04, 26.02. HRMS calculated for  $C_{17}H_{32}N_2O_4$  329.24348  $[M+H]^+$ ; found 329.24346.

Tert-butyl (S)-(1-cyclohexyl-5-methyl-4-oxohex-5-en-3-yl)carbamate (**113**). This compound was prepared according to general procedure F on a 0.91 mmol scale. Purification by silica gel flash column chromatography (1% EtOAc/pentane  $\rightarrow$  10% EtOAc/pentane) yielded the title compound (224 mg, 0.72 mmol, 79%).  $^1H$  NMR (500 MHz,  $CDCl_3$ )  $\delta$  6.06 (s, 1H), 5.88 (d,  $J = 1.8$  Hz, 1H), 5.36 (d,  $J = 8.4$  Hz, 1H), 5.02-4.98 (m, 1H), 1.90 (s, 3H), 1.84-1.77 (m, 1H), 1.69-1.60 (m, 5H), 1.50-1.47 (m, 10H), 1.25-1.07 (m, 7H), 0.90-0.80 (m, 2H).  $^{13}C$  NMR (125 MHz,  $CDCl_3$ )  $\delta$  201.07, 155.43, 142.36, 125.92, 79.42,

54.30, 37.44, 33.29, 33.05, 32.65, 31.25, 28.34, 26.57, 26.26, 26.24, 17.79. HRMS calculated for  $C_{18}H_{31}NO_3$  310.23767  $[M+H]^+$ ; found 310.23775.

Tert-butyl ((3S,4R)-1-cyclohexyl-4-hydroxy-5-methylhex-5-en-3-yl)carbamate (**114**). This compound was prepared according to general procedure G on a 0.72 mmol scale. Purification by silica gel flash column chromatography (5% EtOAc/pentane  $\rightarrow$  30% EtOAc/pentane) yielded the title compound (208 mg, 0.67 mmol, 93%).  $^1H$  NMR (400 MHz,  $CDCl_3$ )  $\delta$  5.02 (s, 1H), 4.93 (s, 1H), 4.83-4.73 (m, 1H), 4.16-4.04 (m, 1H), 3.73-3.67 (m, 1H), 2.77 (s, 1H), 1.75-1.60 (m, 8H), 1.53-1.42 (m, 10H), 1.33-1.08 (m, 7H), 0.93-0.79 (m, 2H).  $^{13}C$  NMR (100 MHz,  $CDCl_3$ )  $\delta$  156.36, 145.12, 111.79, 111.50, 79.36, 77.72, 53.39, 37.71, 33.98, 33.65, 33.21, 28.48, 26.74, 26.45, 26.40, 25.78, 19.50. HRMS calculated for  $C_{18}H_{33}NO_3$  312.25332  $[M+H]^+$ ; found 312.25336.

Boc-HomoCha-EK (**115**). This compound was prepared according to general procedure H on a 0.67 mmol scale. Purification by silica gel flash column chromatography (2% EtOAc/pentane  $\rightarrow$  10% EtOAc/pentane) yielded the title compound (52 mg, 0.16 mmol, 24%).  $^1H$  NMR (400 MHz,  $CDCl_3$ )  $\delta$  4.96 (d,  $J = 8.0$  Hz, 1H), 4.28-4.22 (m, 1H), 3.25 (d,  $J = 5.0$  Hz, 1H), 2.88 (d,  $J = 5.0$  Hz, 1H), 1.81-1.56 (m, 6H), 1.52 (s, 3H), 1.43 (s, 9H), 1.38-1.06 (m, 7H), 0.96-0.78 (m, 2H).  $^{13}C$  NMR (100 MHz,  $CDCl_3$ )  $\delta$  209.40, 155.67, 79.81, 59.13, 53.17, 52.33, 37.45, 33.49, 33.15, 33.02, 29.01, 28.43, 26.69, 26.39, 26.35, 16.82. HRMS calculated for  $C_{18}H_{31}NO_4$  326.23258  $[M+H]^+$ ; found 326.23271.  $[\alpha]_D^{20} +106$  (C 1.0,  $CHCl_3$ ).

Boc-Cha(4- $CF_3$ )-OH (**116**). Boc-Phe(4- $CF_3$ )-OH (1.0 g, 3.0 mmol) was dissolved in MeOH, followed by the addition of Rh on activated alumina (5 wt.%, 300 mg). The mixture was placed under  $H_2$  (4 bar, Parr apparatus) for 48 h. The mixture was filtrated through Celite and concentrated *in vacuo* to give the title product in a quantitative yield.  $^1H$  NMR (400 MHz,  $CDCl_3$ )  $\delta$  12.09 (s, 1H), 6.78 (d,  $J = 7.8$  Hz, 0.4 H), 5.32 (d,  $J = 8.6$  Hz, 0.5 H), 4.47-3.97 (m, 1H), 2.10-0.91 (m, 21H).  $^{13}C$  NMR (100 MHz,  $CDCl_3$ )  $\delta$  177.55, 177.12, 177.03, 157.21, 155.85, 132.12, 131.87, 129.35, 129.12, 126.57, 126.35, 123.80, 123.57, 81.94, 80.11, 52.92, 51.87, 40.60, 40.33, 39.65, 35.27, 33.39, 33.16, 31.61, 30.63, 29.39, 29.18,

28.99, 28.76, 28.19, 28.08, 27.36, 27.26, 24.79, 24.66, 20.67, 20.42. HRMS calculated for  $C_{15}H_{24}F_3NO_4$  340.17302  $[M+H]^+$ ; found 340.17316.

Tert-butyl (S)-(1-(methoxy(methyl)amino)-1-oxo-3-(4-(trifluoromethyl)cyclohexyl)propan-2-yl)carbamate (**117**). This compound was prepared according to general procedure E on a 3.0 mmol scale. Purification by silica gel flash column chromatography (5% EtOAc/pentane  $\rightarrow$  30% EtOAc/pentane) yielded the title compound in quantitative yield.  $^1H$  NMR (400 MHz,  $CDCl_3$ )  $\delta$  5.33-5.28 (m, 1H), 4.72-4.67 (m, 1H), 3.79 (s, 3H), 3.22-3.20 (m, 3H), 2.13-0.86 (m, 21H).  $^{13}C$  NMR (100 MHz,  $CDCl_3$ )  $\delta$  173.34, 155.67, 155.56, 132.03, 131.82, 129.26, 129.05, 126.49, 126.29, 123.71, 79.31, 77.36, 61.43, 48.73, 48.10, 41.87, 41.61, 40.70, 40.44, 39.94, 35.13, 33.26, 32.00, 31.92, 30.38, 29.45, 29.04, 28.17, 26.78, 24.78, 24.62, 20.57, 20.11. HRMS calculated for  $C_{17}H_{29}F_3N_2O_4$  383.21522  $[M+H]^+$ ; found 383.21544.

Tert-butyl (S)-(4-methyl-3-oxo-1-(4-(trifluoromethyl)cyclohexyl)pent-4-en-2-yl)carbamate (**118**). This compound was prepared according to general procedure F on a 3.0 mmol scale. Purification by silica gel flash column chromatography (1% EtOAc/pentane  $\rightarrow$  10% EtOAc/pentane) yielded the title compound (795 mg, 2.2 mmol, 73%).  $^1H$  NMR (400 MHz,  $CDCl_3$ )  $\delta$  6.09 (s, 1H), 5.99-5.80 (m, 1H), 5.43-5.39 (m, 1H), 5.27-4.95 (m, 1H), 2.25-1.10 (m, 24H).  $^{13}C$  NMR (100 MHz,  $CDCl_3$ )  $\delta$  201.11, 201.03, 155.57, 142.23, 142.16, 132.08, 129.30, 129.06, 126.53, 126.06, 79.46, 52.27, 51.76, 41.90, 41.63, 41.03, 40.45, 40.19, 36.62, 33.55, 32.12, 30.58, 29.57, 29.44, 28.19, 27.14, 24.86, 24.69, 20.83, 20.62, 17.69. HRMS calculated for  $C_{18}H_{28}F_3NO_3$  364.20940  $[M+H]^+$ ; found 364.20946.

Tert-butyl ((2S,3R)-3-hydroxy-4-methyl-1-(4-(trifluoromethyl)cyclohexyl)pent-4-en-2-yl)carbamate (**119**). This compound was prepared according to general procedure G on a 2.2 mmol scale. Purification by silica gel flash column chromatography (5% EtOAc/pentane  $\rightarrow$  30% EtOAc/pentane) yielded the title compound in quantitative yield.  $^1H$  NMR (400 MHz,  $CDCl_3$ )  $\delta$  5.09-4.85 (m, 3H), 4.19-4.03 (m, 1H), 3.81-3.76 (m, 1H), 3.24 (s, 1H), 1.78-1.13 (m, 24H).  $^{13}C$  NMR (100 MHz,  $CDCl_3$ )  $\delta$  156.74, 156.16, 144.89, 144.47, 132.23, 129.45, 129.23, 126.68, 126.45, 111.75, 111.42, 79.39, 77.77, 77.66, 50.70,

49.95, 40.70, 40.44, 35.19, 32.60, 30.59, 30.04, 29.52, 28.37, 28.28, 26.89, 25.07, 24.83, 20.94, 20.48, 19.35. HRMS calculated for  $C_{18}H_{30}F_3NO_3$  366.22505  $[M+H]^+$ ; found 366.22509.

Boc-Cha(4- $CF_3$ )-EK (**120**). This compound was prepared according to general procedure H on a 2.2 mmol scale. Purification by silica gel flash column chromatography (2% EtOAc/pentane  $\rightarrow$  10% EtOAc/pentane) yielded the title compound (191 mg, 0.50 mmol, 23%).  $^1H$  NMR (400 MHz,  $CDCl_3$ )  $\delta$  4.97 (t,  $J = 9.3$  Hz, 1H), 4.41-4.19 (m, 1H), 3.28 (d,  $J = 4.9$  Hz, 1H), 2.91 (d,  $J = 4.9$  Hz, 1H), 2.12-1.78 (m, 4H), 1.71-1.66 (m, 3H), 1.59-1.49 (m, 7H), 1.41 (s, 10H).  $^{13}C$  NMR (100 MHz,  $CDCl_3$ )  $\delta$  209.39, 209.35, 155.76, 155.70, 132.19, 131.97, 129.41, 129.20, 126.64, 126.43, 123.87, 79.91, 59.07, 52.44, 51.19, 50.66, 41.98, 41.72, 40.80, 40.53, 38.62, 33.72, 32.26, 30.31, 29.69, 28.34, 26.72, 24.95, 24.71, 20.83, 20.32, 16.75. HRMS calculated for  $C_{18}H_{28}F_3NO_4$  380.20432  $[M+H]^+$ ; found 380.20444.  $[\alpha]_D^{20} + 82$  (C 1.0,  $CHCl_3$ ).

Tert-butyl (S)-(1-(methoxy(methyl)amino)-3-(4-methylcyclohexyl)-1-oxopropan-2-yl)carbamate (**121**). Boc-Cha(4-Me)-OH was prepared according to the literature procedure<sup>6</sup>, followed by peptide coupling according to general procedure E on a 3.1 mmol scale. Purification by silica gel flash column chromatography (5% EtOAc/pentane  $\rightarrow$  30% EtOAc/pentane) yielded the title compound (1.0 g, 3.0 mmol, 97%).  $^1H$  NMR (400 MHz,  $CDCl_3$ )  $\delta$  5.25-5.21 (m, 1H), 4.89-4.53 (m, 1H), 3.79-3.75 (m, 3H), 3.21-3.19 (m, 3H), 2.10-1.13 (m, 20H), 0.97-0.83 (m, 4H).  $^{13}C$  NMR (100 MHz,  $CDCl_3$ )  $\delta$  173.76, 155.55, 155.48, 79.07, 61.38, 48.62, 48.24, 40.27, 36.88, 35.04, 34.83, 33.80, 33.66, 32.53, 32.03, 31.93, 31.05, 30.62, 30.23, 30.10, 29.75, 29.49, 28.18, 27.31, 22.47, 20.25, 14.02. HRMS calculated for  $C_{17}H_{32}N_2O_4$  329.24348  $[M+H]^+$ ; found 329.24354.

Tert-butyl (S)-(4-methyl-1-(4-methylcyclohexyl)-3-oxopent-4-en-2-yl)carbamate (**122**). This compound was prepared according to general procedure F on a 3.0 mmol scale. Purification by silica gel flash column chromatography (1% EtOAc/pentane  $\rightarrow$  10% EtOAc/pentane) yielded the title compound (703 mg, 2.3 mmol, 77%).  $^1H$  NMR (400 MHz,  $CDCl_3$ )  $\delta$  5.96 (s, 1H), 5.82-5.65 (m, 1H), 5.24-5.20 (m, 1H), 5.00-4.91 (m, 1H), 1.76-1.75 (m, 3H), 1.68-.96 (m, 20H), 0.74 (dd,  $J = 13.0, 6.7$  Hz, 4H).  $^{13}C$  NMR (100 MHz,  $CDCl_3$ )  $\delta$  201.33, 155.45, 155.41, 142.21, 142.17, 125.75, 79.19, 52.21,

51.93, 41.37, 38.22, 35.06, 34.85, 33.95, 33.89, 32.55, 32.26, 31.49, 30.67, 30.50, 29.93, 29.71, 28.20, 27.49, 22.49, 20.10, 17.72. HRMS calculated for  $C_{18}H_{31}NO_3$  310.23767  $[M+H]^+$ ; found 310.23774.

Tert-butyl ((2S,3R)-3-hydroxy-4-methyl-1-(4-methylcyclohexyl)pent-4-en-2-yl)carbamate (**123**). This compound was prepared according to general procedure G on a 2.3 mmol scale. Purification by silica gel flash column chromatography (5% EtOAc/pentane  $\rightarrow$  30% EtOAc/pentane) yielded the title compound in quantitative yield.  $^1H$  NMR (400 MHz,  $CDCl_3$ )  $\delta$  5.15-4.79 (m, 2H), 4.15-4.06 (m, 1H), 3.92-3.80 (m, 1H), 2.10-0.64 (m, 27H).  $^{13}C$  NMR (100 MHz,  $CDCl_3$ )  $\delta$  156.07, 144.85, 144.38, 111.66, 111.07, 79.06, 77.64, 77.57, 60.39, 50.50, 50.11, 35.33, 35.03, 34.34, 33.76, 32.72, 31.50, 30.95, 30.53, 29.98, 29.52, 28.33, 27.19, 22.62, 20.09, 19.40, 14.08. HRMS calculated for  $C_{18}H_{33}NO_3$  312.25332  $[M+H]^+$ ; found 312.25341.

Boc-Cha(4- $CH_3$ )-EK (**124**). This compound was prepared according to general procedure H on a 2.3 mmol scale. Purification by silica gel flash column chromatography (2% EtOAc/pentane  $\rightarrow$  10% EtOAc/pentane) yielded the title compound (209 mg, 0.64 mmol, 28%).  $^1H$  NMR (400 MHz,  $CDCl_3$ )  $\delta$  5.03-4.83 (m, 1H), 4.37-4.27 (m, 1H), 3.30-3.29 (m, 1H), 2.90-2.88 (m, 1H), 1.95-0.70 (m, 27H).  $^{13}C$  NMR (100 MHz,  $CDCl_3$ )  $\delta$  209.65, 155.74, 155.70, 79.73, 59.09, 59.06, 52.43, 52.39, 51.22, 50.95, 38.93, 35.81, 35.24, 34.96, 34.22, 34.11, 32.68, 32.03, 31.72, 30.86, 30.39, 30.22, 30.05, 28.48, 28.38, 27.22, 22.67, 20.34. HRMS calculated for  $C_{18}H_{31}NO_4$  326.23258  $[M+H]^+$ ; found 326.23272.  $[\alpha]_D^{20} +103$  (C 1.0,  $CHCl_3$ ).

Tert-butyl (S)-(1-(methoxy(methyl)amino)-3-(4-methoxycyclohexyl)-1-oxopropan-2-yl)carbamate (**125**). Boc-Cha(4-OMe)-OH was prepared according to the literature procedures<sup>10</sup> followed by peptide coupling according to general procedure E on a 2.0 mmol scale. Purification by silica gel flash column chromatography (5% EtOAc/pentane  $\rightarrow$  30% EtOAc/pentane) yielded the title compound (449 mg, 1.3 mmol, 65%).  $^1H$  NMR (400 MHz,  $CDCl_3$ )  $\delta$  5.31-5.08 (m, 1H), 4.74 (s, 1H), 3.78 (s, 3H), 3.39 (s, 1H), 3.33-3.29 (m, 3H), 3.19 (s, 3H), 2.09-1.55 (m, 5H), 1.49-1.24 (m, 15H).  $^{13}C$  NMR (100 MHz,  $CDCl_3$ )  $\delta$  173.76, 173.68, 155.54, 155.48, 79.26, 79.12, 75.26, 61.35, 55.34, 48.35, 48.25, 39.60, 39.21, 33.32,

32.64, 31.95, 31.67, 31.53, 31.33, 28.75, 28.60, 28.17, 27.84, 25.82. HRMS calculated for  $C_{17}H_{32}N_2O_5$  345.23840  $[M+H]^+$ ; found 345.23842.

Tert-butyl (S)-(1-(4-methoxycyclohexyl)-4-methyl-3-oxopent-4-en-2-yl)carbamate (**126**). This compound was prepared according to general procedure F on a 1.3 mmol scale. Purification by silica gel flash column chromatography (1% EtOAc/pentane  $\rightarrow$  10% EtOAc/pentane) yielded the title compound (217 mg, 0.67 mmol, 52%).  $^1H$  NMR (400 MHz,  $CDCl_3$ )  $\delta$  6.07 (s, 1H), 5.88 (d,  $J = 1.8$  Hz, 1H), 5.27 (d,  $J = 8.9$  Hz, 1H), 5.13-5.03 (m, 1H), 3.42-3.37 (m, 1H), 3.29 (s, 3H), 1.93-1.79 (m, 5H), 1.53-1.24 (m, 18H).  $^{13}C$  NMR (100 MHz,  $CDCl_3$ )  $\delta$  201.41, 155.57, 142.13, 126.01, 79.43, 75.23, 55.52, 52.04, 40.74, 33.10, 29.65, 28.94, 28.82, 28.30, 27.98, 26.11, 17.81. HRMS calculated for  $C_{18}H_{31}NO_4$  326.23258  $[M+H]^+$ ; found 326.23279.

Tert-butyl ((2S,3R)-3-hydroxy-1-(4-methoxycyclohexyl)-4-methylpent-4-en-2-yl)carbamate (**127**). This compound was prepared according to general procedure G on a 0.67 mmol scale. Purification by silica gel flash column chromatography (5% EtOAc/pentane  $\rightarrow$  30% EtOAc/pentane) yielded the title compound in quantitative yield.  $^1H$  NMR (400 MHz,  $CDCl_3$ )  $\delta$  5.03 (s, 1H), 4.94-4.86 (m, 2H), 4.14-4.11 (m, 1H), 3.88-3.83 (m, 1H), 3.40-3.38 (m, 1H), 3.28 (s, 3H), 1.90-1.77 (m, 2H), 1.63-1.55 (m, 1H), 1.50-1.26 (m, 17H).  $^{13}C$  NMR (100 MHz,  $CDCl_3$ )  $\delta$  156.10, 144.90, 111.18, 79.24, 77.64, 75.71, 55.54, 50.20, 34.48, 32.85, 29.14, 28.74, 28.44, 28.36, 26.04, 19.51. HRMS calculated for  $C_{18}H_{33}NO_4$  328.24824  $[M+H]^+$ ; found 328.24846.

Boc-Cha(4-OMe)-EK (**128**). This compound was prepared according to general procedure H on a 0.67 mmol scale. Purification by silica gel flash column chromatography (2% EtOAc/pentane  $\rightarrow$  10% EtOAc/pentane) yielded the title compound (56 mg, 0.16 mmol, 24%).  $^1H$  NMR (400 MHz,  $CDCl_3$ )  $\delta$  4.88 (d,  $J = 8.9$  Hz, 1H), 4.36-4.26 (m, 1H), 3.43-3.36 (m, 1H), 3.30-3.29 (m, 3H), 3.27 (d,  $J = 5.0$  Hz, 1H), 2.88 (d,  $J = 5.1$  Hz, 1H), 1.94-1.79 (m, 2H), 1.68-1.55 (m, 2H), 1.46-1.23 (m, 16H).  $^{13}C$  NMR (100 MHz,  $CDCl_3$ )  $\delta$  209.55, 155.63, 79.72, 58.94, 55.50, 52.29, 50.92, 37.99, 33.24, 29.67, 29.16, 28.43,



28.30, 28.06, 25.87, 16.76. HRMS calculated for  $C_{18}H_{31}NO_5$  342.22750  $[M+H]^+$ ; found 342.22755.  $[\alpha]_D^{20} +89$  (C=1.0,  $CHCl_3$ ).

Tert-butyl (S)-3-(decahydronaphthalen-2-yl)-1-(methoxy(methyl) amino)-1-oxopropan-2-ylcarbamate (**129**). Boc-2-DecAla-OH was prepared according to the literature procedure<sup>6</sup>, followed by peptide coupling according to general procedure E on a 1.5 mmol scale. Purification by silica gel flash column chromatography (5% EtOAc/pentane  $\rightarrow$  20% EtOAc/pentane) yielded the title compound (442 mg, 1.2 mmol, 80%).  $^1H$  NMR (400 MHz,  $CDCl_3$ )  $\delta$  5.18 (d, J = 9.4 Hz, 1H), 4.75 (d, J = 9.4 Hz, 1H), 3.79 (s, 3H), 3.20 (s, 3H), 1.87-0.85 (m, 28H).  $^{13}C$  NMR (100 MHz,  $CDCl_3$ )  $\delta$  173.81, 155.51, 79.13, 77.36, 61.42, 48.21, 40.63, 40.47, 35.88, 35.60, 34.72, 33.16, 32.02, 31.96, 31.52, 29.53, 28.20, 26.86, 26.53, 25.60, 20.79. HRMS calculated for  $C_{20}H_{36}N_2O_4$  369.27478  $[M+H]^+$ ; found 369.27489.

Tert-butyl ((2S)-1-(decahydronaphthalen-2-yl)-4-methyl-3-oxopent-4-en-2-yl)carbamate (**130**). This compound was prepared according to general procedure F on a 1.2 mmol scale. Purification by silica gel flash column chromatography (1% EtOAc/pentane  $\rightarrow$  10% EtOAc/pentane) yielded the title compound (297 mg, 0.85 mmol, 71%).  $^1H$  NMR (400 MHz,  $CDCl_3$ )  $\delta$  6.05 (d, J = 7.7 Hz, 1H), 5.85-5.78 (m, 1H), 5.20-5.16 (m, 1H), 5.11-5.04 (m, 1H), 1.86 (s, 3H), 1.68-1.17 (m, 28H).  $^{13}C$  NMR (100 MHz,  $CDCl_3$ )  $\delta$  201.59, 155.53, 142.30, 125.98, 79.46, 52.04, 41.95, 41.69, 36.03, 35.80, 35.70, 35.10, 33.39, 32.34, 32.32, 32.16, 31.85, 28.43, 28.34, 27.01, 27.00, 26.90, 25.76, 25.74, 20.95, 20.91, 17.88. HRMS calculated for  $C_{21}H_{35}NO_3$  350.26897  $[M+H]^+$ ; found 350.26910.

Tert-butyl ((2S,3R)-1-(decahydronaphthalen-2-yl)-3-hydroxy-4-methylpent-4-en-2-yl)carbamate (**131**). This compound was prepared according to general procedure G on a 0.85 mmol scale. Purification by silica gel flash column chromatography (5% EtOAc/pentane  $\rightarrow$  30% EtOAc/pentane) yielded the title compound (287 mg, 0.82 mmol, 96%).  $^1H$  NMR (400 MHz,  $CDCl_3$ )  $\delta$  5.03 (s, 1H), 4.95-4.78 (m, 2H), 4.14-4.11 (m, 1H), 3.88 (d, J = 8.9 Hz, 1H), 2.98 (s, 1H), 1.80-1.07 (m, 31H).  $^{13}C$  NMR (100 MHz,  $CDCl_3$ )  $\delta$  156.12, 144.96, 111.27, 111.18, 79.25, 77.80, 77.71, 50.36, 50.27, 36.17, 35.88, 34.93, 34.84,

33.76, 32.48, 32.42, 32.26, 28.80, 28.43, 28.36, 27.06, 26.73, 25.80, 25.76, 20.97, 19.56. HRMS calculated for  $C_{21}H_{37}NO_3$  352.28462  $[M+H]^+$ ; found 352.28476.

Boc-2-DecAla-EK (**132**). This compound was prepared according to general procedure H on a 0.82 mmol scale. Purification by silica gel flash column chromatography (2% EtOAc/pentane  $\rightarrow$  10% EtOAc/pentane) yielded the title compound (76 mg, 0.21 mmol, 26%).  $^1H$  NMR (400 MHz,  $CDCl_3$ )  $\delta$  4.88-4.85 (m, 1H), 4.38-4.32 (m, 1H), 3.32-3.26 (m, 1H), 2.93-2.86 (m, 1H), 1.74-1.12 (m, 31H).  $^{13}C$  NMR (100 MHz,  $CDCl_3$ )  $\delta$  209.79, 209.71, 155.72, 79.81, 59.18, 59.11, 52.47, 50.92, 39.29, 39.09, 36.13, 35.87, 35.83, 35.80, 35.27, 35.21, 33.52, 32.41, 32.14, 31.43, 29.79, 28.61, 28.42, 27.12, 27.08, 26.56, 25.84, 25.80, 21.01, 16.91. HRMS calculated for  $C_{12}H_{30}N_2O_4$  366.26389  $[M+H]^+$ ; found 366.26393.  $[\alpha]_D^{20} + 90$  (C 1.0,  $CHCl_3$ ).

Tert-butyl (S)-(3-([1,1'-bi(cyclohexan)]-4-yl)-1-(methoxy(methyl)amino)-1-oxopropan-2-yl) carbamate (**133**). Boc-BiCha-OH was prepared according to the literature procedure<sup>6</sup>, followed by peptide coupling according to general procedure E on a 1.8 mmol scale. Purification by silica gel flash column chromatography (5% EtOAc/pentane  $\rightarrow$  20% EtOAc/pentane) yielded the title compound (627 mg, 1.6 mmol, 89%).  $^1H$  NMR (400 MHz,  $CDCl_3$ )  $\delta$  5.10-5.06 (m, 1H), 4.63-4.58 (m, 1H), 3.72-3.67 (m, 3H), 3.13-3.12 (m, 3H), 1.80-0.66 (m, 32H).  $^{13}C$  NMR (100 MHz,  $CDCl_3$ )  $\delta$  173.81, 155.64, 79.22, 61.49, 48.85, 43.20, 41.77, 40.50, 40.42, 36.21, 34.19, 34.14, 32.45, 32.04, 30.72, 30.69, 30.45, 30.39, 30.17, 29.79, 29.59, 28.28, 28.17, 26.78, 26.76, 26.69, 26.67, 25.52, 25.10. HRMS calculated for  $C_{22}H_{40}N_2O_4$  397.30608  $[M+H]^+$ ; found 397.30569.

Tert-butyl (S)-(1-([1,1'-bi(cyclohexan)]-4-yl)-4-methyl-3-oxopent-4-en-2-yl)carbamate (**134**). This compound was prepared according to general procedure F on a 1.6 mmol scale. Purification by silica gel flash column chromatography (1% EtOAc/pentane  $\rightarrow$  10% EtOAc/pentane) yielded the title compound (491 mg, 1.3 mmol, 81%).  $^1H$  NMR (400 MHz,  $CDCl_3$ )  $\delta$  6.09 (s, 1H), 5.97-5.79 (m, 1H), 5.31-5.26 (m, 1H), 5.13-5.03 (m, 1H), 1.91-1.89 (m, 3H), 1.75-0.81 (m, 32H).  $^{13}C$  NMR (100 MHz,  $CDCl_3$ )  $\delta$  201.41, 155.51, 142.31, 142.23, 125.81, 79.31, 52.40, 52.04, 43.19, 41.60, 41.51, 40.27, 37.49,

34.51, 34.25, 32.65, 31.06, 30.61, 30.47, 30.43, 30.19, 29.80, 29.61, 28.33, 28.27, 26.79, 26.77, 26.69, 26.67, 25.58, 25.39, 17.80. HRMS calculated for  $C_{23}H_{39}NO_3$  378.30027  $[M+H]^+$ ; found 378.30036.

Tert-butyl ((2S,3R)-1-([1,1'-bi(cyclohexan)]-4-yl)-3-hydroxy-4-methylpent-4-en-2-yl)carbamate (**135**).

This compound was prepared according to general procedure G on a 1.3 mmol scale. Purification by silica gel flash column chromatography (5% EtOAc/pentane  $\rightarrow$  30% EtOAc/pentane) yielded the title compound (488 mg, 1.29 mmol, 99%).  $^1H$  NMR (400 MHz,  $CDCl_3$ )  $\delta$  5.07-5.03 (m, 1H), 5.00-4.86 (m, 2H), 4.17-4.09 (m, 1H), 3.94-3.59 (m, 1H), 1.80-0.77 (m, 36H).  $^{13}C$  NMR (100 MHz,  $CDCl_3$ )  $\delta$  156.15, 144.95, 144.86, 111.72, 111.15, 79.16, 77.74, 77.68, 60.43, 50.81, 43.41, 43.30, 41.64, 40.12, 34.67, 31.54, 31.11, 31.05, 30.54, 30.51, 30.26, 30.23, 30.00, 29.73, 28.39, 28.32, 27.96, 26.84, 26.74, 25.82, 25.37, 19.48. HRMS calculated for  $C_{23}H_{41}NO_3$  380.31592  $[M+H]^+$ ; found 380.31602.

Boc-BiCha-EK (**136**). This compound was prepared according to general procedure H on a 1.29 mmol scale. Purification by silica gel flash column chromatography (2% EtOAc/pentane  $\rightarrow$  10% EtOAc/pentane) yielded the title compound (228 mg, 0.58 mmol, 45%).  $^1H$  NMR (400 MHz,  $CDCl_3$ )  $\delta$  4.92-4.89 (m, 1H), 4.40-4.18 (m, 1H), 3.30 (d,  $J = 4.9$  Hz, 1H), 2.89 (d,  $J = 4.9$  Hz, 1H), 1.89-0.82 (m, 35H).  $^{13}C$  NMR (100 MHz,  $CDCl_3$ )  $\delta$  209.63, 155.75, 79.71, 59.11, 59.05, 52.45, 52.38, 51.31, 50.98, 43.32, 41.75, 40.32, 38.95, 35.09, 34.72, 34.39, 32.35, 31.32, 30.87, 30.81, 30.63, 30.59, 30.32, 30.29, 29.90, 29.75, 29.64, 28.38, 27.88, 26.91, 26.83, 26.81, 26.78, 25.75, 25.26, 16.84. HRMS calculated for  $C_{23}H_{39}NO_4$  394.29519  $[M+H]^+$ ; found 394.29511.  $[\alpha]_D^{20} +83$  (C 1.0,  $CHCl_3$ ).

Tert-butyl(S)-3-(bicyclo[2.2.1]heptan-2-yl)-1-(methoxy(methyl)amino)-1-oxopropan-2-ylcarbamate (**137**). Boc-NorAla-OH was prepared according to the literature procedure<sup>6</sup>, followed by peptide coupling according to general procedure E on a 1.0 mmol scale. Purification by silica gel flash column chromatography (5% EtOAc/pentane  $\rightarrow$  20% EtOAc/pentane) yielded the title compound (254 mg, 0.78 mmol, 78%).  $^1H$  NMR (400 MHz,  $CDCl_3$ )  $\delta$  5.17-5.09 (m, 1H), 4.75-4.54 (m, 1H), 3.79 (s, 3H), 3.20 (s, 3H), 2.27-1.98 (m, 2H), 1.98-1.65 (m, 2H), 1.58-1.41 (m, 13H), 1.38-1.23 (m, 3H), 1.23-1.02 (m, 2H).  $^{13}C$  NMR (100 MHz,  $CDCl_3$ )  $\delta$  173.57, 155.55, 79.38, 61.60, 61.60, 50.28, 50.09, 49.64, 49.00,

41.89, 40.74, 40.57, 40.04, 39.84, 39.58, 38.55, 38.44, 38.32, 37.16, 37.09, 36.32, 35.56, 35.51, 35.22, 32.13, 30.10, 29.95, 28.38, 22.74, 22.05. HRMS calculated for  $C_{17}H_{30}N_2O_4$  327.22783  $[M+H]^+$ ; found 327.22794.

Tert-butyl (S)-1-(bicyclo[2.2.1]heptan-2-yl)-4-methyl-3-oxopent-4-en-2-ylcarbamate (**138**). This compound was prepared according to general procedure F on a 0.78 mmol scale. Purification by silica gel flash column chromatography (1% EtOAc/pentane  $\rightarrow$  10% EtOAc/pentane) yielded the title compound (183 mg, 0.60 mmol, 77%).  $^1H$  NMR (400 MHz,  $CDCl_3$ )  $\delta$  6.10 (d,  $J = 6.9$  Hz, 1H), 5.88 (d,  $J = 5.7$  Hz, 1H), 5.27-5.19 (m, 1H), 5.11-4.82 (m, 1H), 2.25-1.97 (m, 2H), 1.94-1.65 (m, 5H), 1.52-1.38 (m, 13H), 1.34-1.02 (m, 5H).  $^{13}C$  NMR (100 MHz,  $CDCl_3$ )  $\delta$  201.64, 155.49, 142.61, 126.15, 79.54, 53.73, 53.66, 53.24, 52.70, 41.89, 41.37, 41.05, 40.84, 40.74, 40.03, 40.00, 39.88, 38.72, 38.60, 38.53, 38.34, 37.26, 37.19, 37.15, 37.01, 36.80, 36.73, 36.58, 35.57, 35.29, 30.23, 30.08, 30.03, 28.67, 28.58, 28.42, 22.71, 22.51, 17.92. HRMS calculated for  $C_{18}H_{29}NO_3$  308.22202  $[M+H]^+$ ; found 308.22215.

Tert-butyl(2S,3R)-1-(bicyclo[2.2.1]heptan-2-yl)-3-hydroxy-4-methylpent-4-en-2-ylcarbamate (**139**). This compound was prepared according to general procedure G on a 0.60 mmol scale. Purification by silica gel flash column chromatography (5% EtOAc/pentane  $\rightarrow$  30% EtOAc/pentane) yielded the title compound (170 mg, 0.55 mmol, 92%).  $^1H$  NMR (400 MHz,  $CDCl_3$ )  $\delta$  5.10-4.86 (m, 2H), 4.77-4.70 (m, 1H), 4.22-3.97 (m, 1H), 3.74-3.62 (m, 1H), 2.80-2.45 (m, 1H), 2.23-1.95 (m, 2H), 1.95-1.56 (m, 4H), 1.56-0.84 (m, 19H).  $^{13}C$  NMR (100 MHz,  $CDCl_3$ )  $\delta$  156.29, 145.08, 111.93, 111.43, 79.41, 78.08, 52.70, 52.52, 52.14, 42.31, 40.99, 40.24, 39.91, 39.39, 38.81, 37.29, 37.18, 36.82, 36.72, 36.61, 35.62, 35.16, 31.56, 30.73, 30.32, 30.16, 28.52, 22.93, 22.23, 19.57. HRMS calculated for  $C_{18}H_{31}NO_3$  310.23767  $[M+H]^+$ ; found 310.23777.

Boc-NorAla-EK (**140**). This compound was prepared according to general procedure H on a 0.55 mmol scale. Purification by silica gel flash column chromatography (2% EtOAc/pentane  $\rightarrow$  10% EtOAc/pentane) yielded the title compound (48 mg, 0.15 mmol, 27%).  $^1H$  NMR (400 MHz,  $CDCl_3$ )  $\delta$  5.02-4.69 (m, 1H), 4.39-4.12 (m, 1H), 3.28 (d,  $J = 4.8$  Hz, 1H), 2.91-2.86 (m, 1H), 2.35-2.03 (m, 2H),

1.83-0.94 (m, 23H).  $^{13}\text{C}$  NMR (100 MHz,  $\text{CDCl}_3$ )  $\delta$  209.64, 155.57, 79.72, 59.07, 52.53, 52.39, 51.24, 41.98, 40.82, 40.08, 39.83, 39.32, 38.63, 38.43, 37.27, 37.18, 37.08, 36.73, 36.60, 35.44, 35.21, 34.38, 30.13, 30.03, 29.83, 29.70, 28.58, 28.33, 22.73, 22.03, 16.79. HRMS calculated for  $\text{C}_{18}\text{H}_{29}\text{NO}_4$  324.21693  $[\text{M}+\text{H}]^+$ ; found 324.21705.  $[\alpha]_{\text{D}}^{20} +81$  (C 0.3,  $\text{CHCl}_3$ ).

(S)-(1,2,3,4-tetrahydronaphthalen-1-yl)methanol (**55i**). (S)-1,2,3,4-Tetrahydronaphthalene-1-carboxylic acid **54** (2.0 g, 11.4 mmol) was dissolved in anhydrous  $\text{Et}_2\text{O}$  and the reaction solution was cooled to 0 °C.  $\text{LiAlH}_4$  (14.8 mL, 14.8 mmol, 1M solution in  $\text{Et}_2\text{O}$ , 1.3 eq.) was slowly added and the reaction was stirred at 0 °C for 2 h. The reaction was quenched with 0.1 M HCl and the mixture was filtrated. The filtrate was concentrated in vacuo and purification by silica gel flash column chromatography (5% EtOAc/pentane  $\rightarrow$  20% EtOAc/pentane) gave the title compound in quantitative yield.  $^1\text{H}$  NMR (400 MHz,  $\text{CDCl}_3$ )  $\delta$  7.25-6.85 (m, 4H), 3.77-3.50 (m, 3H), 2.91-2.85 (m, 1H), 2.78-2.57 (m, 2H), 2.01-1.57 (m, 4H).  $^{13}\text{C}$  NMR (100 MHz,  $\text{CDCl}_3$ )  $\delta$  137.64, 136.70, 128.99, 128.72, 125.77, 125.36, 66.51, 60.38, 40.08, 29.51, 24.70, 19.31. HRMS calculated for  $\text{C}_{11}\text{H}_{14}\text{O}$  163.11174  $[\text{M}+\text{H}]^+$ ; found 163.11164.

(S)-(1,2,3,4-tetrahydronaphthalen-1-yl)methyl-4-methylbenzenesulfonate (**55ii**). Compound **55i** (1.85 g, 11.4 mmol) was dissolved in anhydrous DCM, followed by the addition of TsCl (4.3 g, 22.8 mmol, 2.0 eq.) and TEA (3.2 mL, 22.8 mmol, 2.0 eq.). After stirring at r.t. for 48 h, the reaction mixture was concentrated *in vacuo*. The residue was dissolved in EtOAc and washed with sat. aq.  $\text{NaHCO}_3$  (2 $\times$ ) and brine. The organic layer was dried over  $\text{MgSO}_4$  and concentrated in vacuo. Purification by silica gel flash column chromatography (2% EtOAc/pentane  $\rightarrow$  10% EtOAc/pentane) yielded the title compound (3.5 g, 11.1 mmol, 97%).  $^1\text{H}$  NMR (400 MHz,  $\text{CDCl}_3$ )  $\delta$  7.71 (d,  $J = 8.1$  Hz, 2H), 7.25 (d,  $J = 8.1$  Hz, 2H), 7.09-6.89 (m, 4H), 4.15-4.12 (m, 1H), 4.00 (t,  $J = 9.7$  Hz, 1H), 3.09-3.03 (m, 1H), 2.71-2.48 (m, 2H), 2.34 (s, 3H), 1.91-1.48 (m, 4H).  $^{13}\text{C}$  NMR (100 MHz,  $\text{CDCl}_3$ )  $\delta$  144.43, 137.44, 133.87, 132.64, 129.56, 129.07, 128.51, 127.42, 126.32, 125.46, 72.79, 36.79, 28.89, 24.20, 21.14, 18.43.

(R)-2-(1,2,3,4-tetrahydronaphthalen-1-yl)acetonitrile (**55**). Compound **55ii** (3.5 g, 11.1 mmol) was dissolved in DMF, followed by the addition of NaCN (1.1 g, 22.2 mmol, 2 eq.). After refluxing overnight, the reaction mixture was diluted with EtOAc, washed with H<sub>2</sub>O (2×), sat. aq. NaHCO<sub>3</sub> (2×) and brine, dried over MgSO<sub>4</sub> and concentrated *in vacuo*. Purification by silica gel flash column chromatography (2% EtOAc/pentane → 10% EtOAc/pentane) yielded the title compound (1.8 g, 10.5 mmol, 95%). <sup>1</sup>H NMR (400 MHz, CDCl<sub>3</sub>) δ 7.10-6.97 (m, 4H), 3.06-3.00 (m, 1H), 2.77-2.59 (m, 2H), 2.57-2.35 (m, 2H), 1.99-1.61 (m, 4H). <sup>13</sup>C NMR (100 MHz, CDCl<sub>3</sub>) δ 136.62, 136.23, 129.00, 127.57, 126.28, 125.58, 118.55, 34.09, 28.86, 27.67, 23.99, 19.06. HRMS calculated for C<sub>12</sub>H<sub>13</sub>N 172.11208 [M+H]<sup>+</sup>; found 172.11197.

(R)-N-methoxy-N-methyl-2-(1,2,3,4-tetrahydronaphthalen-1-yl)acetamide (**56**). Compound **55** (1.8 g, 10.5 mmol) was dissolved in ethylene glycol, followed by the addition of KOH (4.7 mL, 84 mmol, 1 g/mL solution, 8.0 eq.). The reaction was stirred at 170 °C overnight. The reaction mixture was poured in H<sub>2</sub>O and the pH was adjusted to 2-3 with conc. HCl. The mixture was extracted with EtOAc (3×) and the combined organic layer was washed by H<sub>2</sub>O (3×), brine, dried over MgSO<sub>4</sub> and concentrated *in vacuo*. The crude intermediate was directly coupled with N,O-dimethylhydroxylamine hydrochloride (1.2 eq.) according to general procedure B on a 10.5 mmol scale. Purification by silica gel flash column chromatography (5% EtOAc/pentane → 30% EtOAc/pentane) yielded the title compound (1.2 g, 5.1 mmol, 49%). <sup>1</sup>H NMR (400 MHz, CDCl<sub>3</sub>) δ 7.22-7.01 (m, 4H), 3.59 (s, 3H), 3.48-3.42 (m, 1H), 3.20 (s, 3H), 2.85-2.66 (m, 4H), 2.00-1.64 (m, 4H). <sup>13</sup>C NMR (100 MHz, CDCl<sub>3</sub>) δ 173.62, 139.98, 137.09, 129.15, 128.46, 125.80, 125.72, 61.15, 39.34, 33.85, 33.85, 29.58, 28.05, 19.48. HRMS calculated for C<sub>14</sub>H<sub>19</sub>NO<sub>2</sub> 234.14886 [M+H]<sup>+</sup>; found 234.14874.

(S)-2-methyl-N-((E)-2-((R)-1,2,3,4-tetrahydronaphthalen-1-yl)ethylidene)propane-2-sulfinamide (**59**). Compound **56** (1.2 g, 5.1 mmol) was dissolved in Et<sub>2</sub>O and the reaction solution was cooled to 0 °C. LiAlH<sub>4</sub> (6.6 mL, 6.6 mmol, 1 M solution in Et<sub>2</sub>O, 1.3 eq.) was slowly added and the reaction was stirred at 0 °C for 2 h. The reaction was quenched with 0.1 M HCl and the suspension was filtrated. The filtrate was concentrated *in vacuo* and co-evaporated with toluene (3×). The obtained aldehyde intermediate **57**

was dissolved in anhydrous DCM, followed by the addition of (S)-2-methylpropane-2-sulfinamide **58** (0.92 g, 7.7 mmol, 1.5 eq.) and anhydrous CuSO<sub>4</sub> (3.3 g, 20.4 mmol, 4.0 eq.). After stirring at r.t. for 48 h, the suspension solution was filtrated through Celite and concentrated *in vacuo*. Purification by silica gel flash column chromatography (2% EtOAc/pentane → 25% EtOAc/pentane) yielded the title compound (1.2 g, 4.3 mmol, 84%). <sup>1</sup>H NMR (400 MHz, CDCl<sub>3</sub>) δ 8.13 (t, J = 4.8 Hz, 1H), 7.22-6.96 (m, 4H), 3.34-3.28 (m, 1H), 2.96-2.65 (m, 4H), 1.98-1.61 (m, 4H), 1.18 (s, 9H). <sup>13</sup>C NMR (100 MHz, CDCl<sub>3</sub>) δ 168.64, 138.95, 137.11, 129.24, 128.14, 125.94, 125.82, 56.64, 43.17, 34.97, 29.46, 28.11, 22.33, 19.76. HRMS calculated for C<sub>16</sub>H<sub>23</sub>NOS 278.15731 [M+H]<sup>+</sup>; found 278.15723.

(S)-N-((S)-1-cyano-2-((R)-1,2,3,4-tetrahydronaphthalen-1-yl)ethyl)-2-methylpropane-2-sulfinamide (**60**). Compound **59** (1.2 g, 4.3 mmol) was dissolved in anhydrous THF and the solution was cooled to -78 °C. Et<sub>2</sub>AlCN (6.5 mL, 6.5 mmol, 1M solution in toluene, 1.5 eq.) was added to anhydrous THF, followed by the addition of i-PrOH (1.0 mL, 12.9 mmol, 3.0 eq.). After stirring at r.t. for 15 min, this solution was slowly added to a cooled solution of compound **130** in anhydrous THF. The reaction was stirred at r.t. until TLC-MS analysis showed complete conversion of the starting material. The reaction mixture was cooled to -78 °C again and sat. aq. NaHCO<sub>3</sub> (5.5 mL) was added. The reaction mixture was allowed to warm up to r.t. and the suspension solution was filtrated. The filtrate was concentrated *in vacuo* and purification by silica gel flash column chromatography (5% EtOAc/pentane → 50% EtOAc/pentane) yielded the title compound (1.1 g, 3.6 mmol, 84%) as a single diastereoisomer (de > 95%). <sup>1</sup>H NMR (400 MHz, CDCl<sub>3</sub>) δ 7.20-6.92 (m, 4H), 4.48 (d, J = 8.5 Hz, 1H), 4.31-4.25 (m, 1H), 3.13-3.07 (m, 1H), 2.85-2.67 (m, 2H), 2.30-2.23 (m, 1H), 2.16-2.01 (m, 1H), 1.99-1.59 (m, 4H), 1.24 (s, 9H). <sup>13</sup>C NMR (100 MHz, CDCl<sub>3</sub>) δ 138.57, 136.89, 129.43, 128.35, 126.23, 125.86, 119.47, 57.06, 44.91, 41.94, 34.11, 29.09, 27.26, 22.54, 19.21. HRMS calculated for C<sub>17</sub>H<sub>24</sub>N<sub>2</sub>OS 305.16821 [M+H]<sup>+</sup>; found 305.16827.

Boc-1-(R)-TetraNal-OH (**61**). Compound **60** (1.1 g, 3.6 mmol) was dissolved in 6M HCl and refluxed for 48 h. The mixture was co-evaporated with toluene (3×) to give the unprotected amino acid as the HCl salt. Subsequently, the amino acid was dissolved in THF/H<sub>2</sub>O (1:1, v/v), followed by the addition

of Boc<sub>2</sub>O (1.2 g, 5.4 mmol, 1.5 eq.) and TEA (2.0 mL, 14.4 mmol, 4 eq.). After stirring overnight, the mixture was concentrated *in vacuo* and the residue dissolved in EtOAc. The organic layer was washed with H<sub>2</sub>O and brine, dried over MgSO<sub>4</sub> and concentrated *in vacuo*. Purification by silica gel flash column chromatography (10% EtOAc/pentane → 50% EtOAc/pentane with 0.1% acetic acid) yielded the title compound (670 mg, 2.1 mmol, 58 %). <sup>1</sup>H NMR (400 MHz, CDCl<sub>3</sub>) δ 10.46 (s, 1H), 7.16-7.01 (m, 4H), 5.08 (d, J = 8.4 Hz, 1H), 4.46-4.24 (m, 1H), 3.12-2.88 (m, 1H), 2.88-2.61 (m, 2H), 2.24-2.17 (m, 1H), 2.04-1.68 (m, 5H), 1.45 (s, 9H). <sup>13</sup>C NMR (100 MHz, CDCl<sub>3</sub>) δ 177.91, 177.20, 155.55, 155.51, 139.90, 137.07, 129.35, 128.77, 126.01, 125.86, 114.20, 52.36, 40.01, 34.36, 29.81, 29.45, 28.42, 19.43. HRMS calculated for C<sub>18</sub>H<sub>25</sub>NO<sub>4</sub> 320.18563 [M+H]<sup>+</sup>; found 320.18567.

Tert-butyl ((S)-1-(methoxy(methyl)amino)-1-oxo-3-((R)-1,2,3,4-tetrahydronaphthalen-1-yl) propan-2-yl)carbamate (**62**). This compound was prepared according to general procedure E on a 1.3 mmol scale. Purification by silica gel flash column chromatography (5% EtOAc/pentane → 30% EtOAc/pentane) yielded the title compound (355 mg, 1.0 mmol, 77%). <sup>1</sup>H NMR (400 MHz, CDCl<sub>3</sub>) δ 7.24 (d, J = 7.5 Hz, 1H), 7.17-7.00 (m, 3H), 5.24 (d, J = 9.6 Hz, 1H), 4.95-4.80 (m, 1H), 3.57 (s, 3H), 3.16 (s, 3H), 2.94-2.67 (m, 3H), 2.09-1.62 (m, 6H), 1.45 (s, 9H). <sup>13</sup>C NMR (100 MHz, CDCl<sub>3</sub>) δ 173.62, 155.57, 140.20, 136.63, 129.17, 129.11, 125.82, 125.56, 79.58, 61.49, 49.20, 34.33, 32.13, 29.09, 28.82, 28.40, 19.11. HRMS calculated for C<sub>20</sub>H<sub>30</sub>N<sub>2</sub>O<sub>4</sub> 363.22783 [M+H]<sup>+</sup>; found 363.22791.

Tert-butyl ((S)-4-methyl-3-oxo-1-((R)-1,2,3,4-tetrahydronaphthalen-1-yl)pent-4-en-2-yl) carbamate (**63**). This compound was prepared according to general procedure F on a 1.0 mmol scale. Purification by silica gel flash column chromatography (1% EtOAc/pentane → 10% EtOAc/pentane) yielded the title compound (267 mg, 0.78 mmol, 78%). <sup>1</sup>H NMR (400 MHz, CDCl<sub>3</sub>) δ 7.28-7.26 (m, 1H), 7.21-6.98 (m, 3H), 5.81 (s, 1H), 5.78-5.74 (m, 1H), 5.35 (d, J = 8.8 Hz, 1H), 5.22-5.16 (m, 1H), 2.92-2.86 (m, 1H), 2.85-2.62 (m, 2H), 2.16-1.97 (m, 1H), 1.97-1.59 (m, 8H), 1.46 (s, 9H). <sup>13</sup>C NMR (100 MHz, CDCl<sub>3</sub>) δ 201.41, 155.47, 142.26, 140.07, 136.58, 129.29, 129.07, 126.59, 126.00, 125.79, 79.73, 52.64, 41.72, 34.18, 29.09, 28.76, 28.41, 19.06, 17.83. HRMS calculated for C<sub>21</sub>H<sub>29</sub>NO<sub>3</sub> 344.22202 [M+H]<sup>+</sup>; found 344.22205.



Tert-butyl ((2S,3R)-3-hydroxy-4-methyl-1-((R)-1,2,3,4-tetrahydronaphthalen-1-yl)pent-4-en-2-yl)-carbamate (**64**). This compound was prepared according to general procedure G on a 0.78 mmol scale. Purification by silica gel flash column chromatography (5% EtOAc/pentane → 30% EtOAc/pentane) yielded the title compound (158 mg, 0.46 mmol, 59%). <sup>1</sup>H NMR (400 MHz, CDCl<sub>3</sub>) δ 7.23-6.97 (m, 4H), 5.02 (s, 1H), 4.98-4.77 (m, 2H), 4.14 (s, 1H), 4.02-3.94 (m, 1H), 2.93-2.80 (m, 1H), 2.80-2.68 (m, 2H), 2.61-2.51 (m, 1H), 1.95-1.67 (m, 6H), 1.62 (s, 3H), 1.45 (s, 9H). <sup>13</sup>C NMR (100 MHz, CDCl<sub>3</sub>) δ 156.14, 144.95, 140.71, 136.70, 129.28, 128.86, 125.80, 125.63, 111.57, 79.54, 77.84, 51.68, 36.11, 34.98, 29.26, 29.09, 28.51, 19.37. HRMS calculated for C<sub>21</sub>H<sub>31</sub>NO<sub>3</sub> 346.23767 [M+H]<sup>+</sup>; found 346.23772.

Boc-1-(R)-TetraNal-EK (**65**). This compound was prepared according to general procedure H on a 0.46 mmol scale. Purification by silica gel flash column chromatography (2% EtOAc/pentane → 10% EtOAc/pentane) yielded the title compound (53 mg, 0.15 mmol, 33%). <sup>1</sup>H NMR (400 MHz, CDCl<sub>3</sub>) δ 7.20-7.02 (m, 4H), 4.96 (d, J = 9.0 Hz, 1H), 4.49-4.44 (m, 1H), 3.28 (d, J = 5.0 Hz, 1H), 2.99-2.89 (m, 1H), 2.85 (d, J = 5.0 Hz, 1H), 2.81-2.65 (m, 2H), 2.11-1.69 (m, 6H), 1.50 (s, 3H), 1.42 (s, 9H). <sup>13</sup>C NMR (100 MHz, CDCl<sub>3</sub>) δ 209.84, 155.50, 140.00, 136.97, 129.31, 128.83, 126.05, 125.88, 79.99, 59.12, 52.34, 51.92, 39.38, 35.16, 29.41, 28.60, 28.44, 19.49, 16.76. HRMS calculated for C<sub>21</sub>H<sub>29</sub>NO<sub>4</sub> 360.21693 [M+H]<sup>+</sup>; found 360.21690. [ $\alpha$ ]<sub>D</sub><sup>20</sup> + 78 (C 1.0, CHCl<sub>3</sub>).

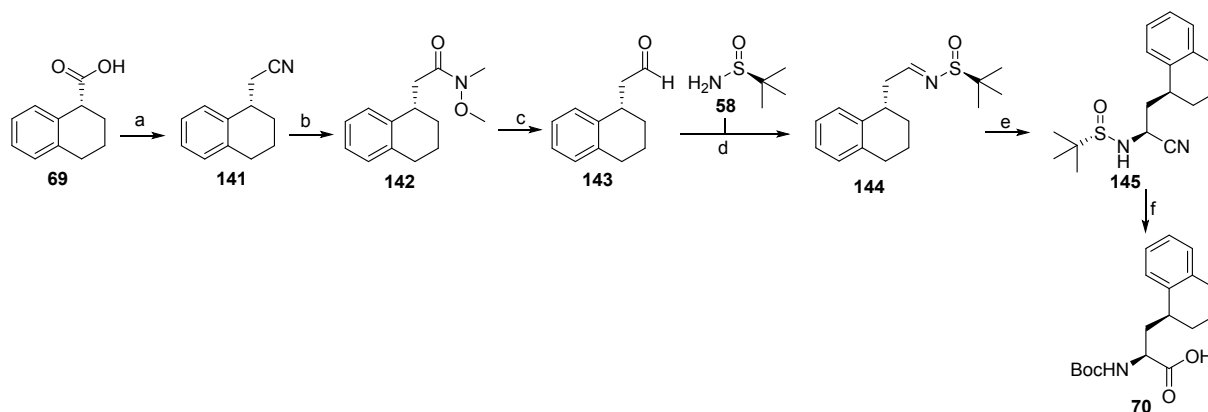

**Scheme S3.** Synthesis of compound **70**. Reagents and conditions: (a) i) LiAlH<sub>4</sub>/Et<sub>2</sub>O; ii) TsCl/TEA/DCM; iii) NaCN/DMF; (b) i) KOH/ethylene glycol; ii) N,O-dimethylhydroxylamine hydrochloride, HCTU/DiPEA/DCM; (c) LiAlH<sub>4</sub>/Et<sub>2</sub>O; d) **58**/CuSO<sub>4</sub>/DCM; (e) Et<sub>2</sub>AlCN/i-PrOH/THF; (f) i) 6 M HCl, reflux; ii) Boc<sub>2</sub>O/TEA/THF/H<sub>2</sub>O.

(R)-(1,2,3,4-tetrahydronaphthalen-1-yl)methanol (**141i**). This compound was obtained using the same procedures as described above for the preparation of compound **55i** on a 11.4 mmol scale. Purification by silica gel flash column chromatography (5% EtOAc/pentane → 20% EtOAc/pentane) yielded the title compound (1.8 g, 11.1 mmol, 97%). <sup>1</sup>H NMR (400 MHz, CDCl<sub>3</sub>) δ 7.18-7.09 (m, 1H), 7.09-6.94 (m, 3H), 3.72-3.68 (m, 1H), 3.67-3.57 (m, 2H), 2.91-2.85 (m, 1H), 2.68 (t, J = 5.6 Hz, 2H), 2.00-1.57 (m, 4H). <sup>13</sup>C NMR (100 MHz, CDCl<sub>3</sub>) δ 137.66, 136.71, 129.00, 128.73, 125.78, 125.37, 66.52, 40.09, 29.52, 24.71, 19.31. HRMS calculated for C<sub>11</sub>H<sub>14</sub>O 163.11174 [M+H]<sup>+</sup>; found 163.11152.

(R)-(1,2,3,4-tetrahydronaphthalen-1-yl)methyl 4-methylbenzenesulfonate (**141ii**). This compound was obtained using the same procedures as described above for the preparation of compound **55ii** on a 11.1 mmol scale. Purification by silica gel flash column chromatography (2% EtOAc/pentane → 10% EtOAc/pentane) yielded the title compound (3.2 g, 10.1 mmol, 91%). <sup>1</sup>H NMR (400 MHz, CDCl<sub>3</sub>) δ 7.78-7.67 (m, 2H), 7.27 (d, J = 8.1 Hz, 2H), 7.10-6.91 (m, 4H), 4.17-4.13 (m, 1H), 4.01 (t, J = 9.7 Hz, 1H), 3.12-3.05 (m, 1H), 2.72-2.58 (m, 2H), 2.37 (s, 3H), 1.90-1.49 (m, 4H). <sup>13</sup>C NMR (100 MHz, CDCl<sub>3</sub>) δ 144.59, 137.63, 133.99, 132.70, 129.68, 129.21, 128.69, 127.58, 126.46, 125.58, 72.94, 36.92, 29.03, 24.30, 21.34, 18.52.

(S)-2-(1,2,3,4-tetrahydronaphthalen-1-yl)acetonitrile (**141**). This compound was obtained using the same procedures as described above for the preparation of compound **55** on a 10.1 mmol scale. Purification by silica gel flash column chromatography (2% EtOAc/pentane → 10% EtOAc/pentane) yielded the title compound (1.7 g, 9.9 mmol, 98%). <sup>1</sup>H NMR (400 MHz, CDCl<sub>3</sub>) δ 7.17-6.94 (m, 4H), 3.08-3.02 (m, 1H), 2.77-2.61 (m, 2H), 2.61-2.36 (m, 2H), 2.02-1.64 (m, 4H). <sup>13</sup>C NMR (100 MHz,

CDCl<sub>3</sub>) δ 136.70, 136.30, 129.08, 127.63, 126.36, 125.66, 118.59, 34.19, 28.93, 27.75, 24.09, 19.13.  
HRMS calculated for C<sub>12</sub>H<sub>13</sub>N 172.11208 [M+H]<sup>+</sup>; found 172.11194.

(S)-N-methoxy-N-methyl-2-(1,2,3,4-tetrahydronaphthalen-1-yl)acetamide (**142**). This compound was obtained using the same procedures as described above for the preparation of compound **56** on a 9.9 mmol scale. Purification by silica gel flash column chromatography (5% EtOAc/pentane → 30% EtOAc/pentane) yielded the title compound (0.7 g, 3.0 mmol, 30%). <sup>1</sup>H NMR (400 MHz, CDCl<sub>3</sub>) δ 7.18-6.93 (m, 4H), 3.54 (s, 3H), 3.50-3.33 (m, 1H), 3.16 (s, 3H), 2.79-2.61 (m, 4H), 1.97-1.62 (m, 4H). <sup>13</sup>C NMR (100 MHz, CDCl<sub>3</sub>) δ 173.07, 139.64, 136.68, 128.83, 128.11, 125.49, 125.41, 60.79, 39.07, 33.57, 29.28, 27.83, 19.24. HRMS calculated for C<sub>14</sub>H<sub>19</sub>NO<sub>2</sub> 234.14886 [M+H]<sup>+</sup>; found 234.14883.

(S)-2-methyl-N-((E)-2-((S)-1,2,3,4-tetrahydronaphthalen-1-yl)ethylidene)propane-2-sulfonamide (**144**). This compound was obtained using the same procedures as described above for the preparation of compound **59** on a 3.0 mmol scale. Purification by silica gel flash column chromatography (2% EtOAc/pentane → 25% EtOAc/pentane) yielded the title compound (584 mg, 2.1 mmol, 70%). <sup>1</sup>H NMR (400 MHz, CDCl<sub>3</sub>) δ 8.13-8.11 (m, 1H), 7.22-6.94 (m, 4H), 3.30-3.24 (m, 1H), 2.93-2.61 (m, 4H), 1.98-1.58 (m, 4H), 1.17 (s, 9H). <sup>13</sup>C NMR (100 MHz, CDCl<sub>3</sub>) δ 168.64, 138.64, 136.93, 129.16, 128.04, 125.88, 125.68, 56.43, 42.99, 34.99, 29.32, 28.13, 22.22, 19.68. HRMS calculated for C<sub>16</sub>H<sub>23</sub>NO<sub>2</sub> 278.15731 [M+H]<sup>+</sup>; found 278.15724.

(S)-N-((S)-1-cyano-2-((S)-1,2,3,4-tetrahydronaphthalen-1-yl)ethyl)-2-methylpropane-2-sulfonamide (**145**). This compound was obtained using the same procedures as described above for the preparation of compound **60** on a 2.1 mmol scale. Purification by silica gel flash column chromatography (5% EtOAc/pentane → 50% EtOAc/pentane) yielded the title compound (506 mg, 1.7 mmol, 81%). <sup>1</sup>H NMR (400 MHz, CDCl<sub>3</sub>) δ 7.21-7.02 (m, 4H), 4.30 (d, J = 8.9 Hz, 1H), 4.24-4.18 (m, 1H), 3.10-3.04 (m, 1H), 2.88-2.62 (m, 2H), 2.33-2.26 (m, 1H), 2.13-2.05 (m, 1H), 1.97-1.63 (m, 4H), 1.26 (s, 9H). <sup>13</sup>C NMR (100 MHz, CDCl<sub>3</sub>) δ 138.56, 137.04, 129.51, 128.51, 126.35, 125.97, 119.89, 57.27, 45.25, 42.03,

33.58, 29.19, 27.08, 22.65, 19.13. HRMS calculated for  $C_{17}H_{24}N_2OS$  305.16821  $[M+H]^+$ ; found 305.16828.

Tert-butyl ((S)-1-(methoxy(methyl)amino)-1-oxo-3-((S)-1,2,3,4-tetrahydronaphthalen-1-yl)propan-2-yl)carbamate (**146**). Compound **70** was obtained using the same procedures as described above for the preparation of compound **61** on a 1.7 mmol scale. The crude product was directly coupled with N,O-dimethylhydroxylamine according to general procedure E. Purification by silica gel flash column chromatography (5% EtOAc/pentane  $\rightarrow$  30% EtOAc/pentane) yielded the title compound (430 mg, 1.2 mmol, 71%).  $^1H$  NMR (400 MHz,  $CDCl_3$ )  $\delta$  7.17-6.97 (m, 4H), 5.54 (d,  $J = 9.6$  Hz, 1H), 4.83 (t,  $J = 10.0$  Hz, 1H), 3.78 (s, 3H), 3.16 (s, 3H), 3.00-2.85 (m, 1H), 2.77-2.69 (m, 2H), 2.05-1.67 (m, 6H), 1.45 (s, 9H).  $^{13}C$  NMR (100 MHz,  $CDCl_3$ )  $\delta$  173.49, 155.92, 140.23, 136.94, 128.94, 128.49, 125.56, 125.49, 79.36, 61.48, 48.85, 39.79, 33.67, 32.08, 29.56, 28.25, 26.24, 19.19. HRMS calculated for  $C_{20}H_{30}N_2O_4$  363.22783  $[M+H]^+$ ; found 363.22782.

Tert-butyl ((S)-4-methyl-3-oxo-1-((S)-1,2,3,4-tetrahydronaphthalen-1-yl)pent-4-en-2-yl)carbamate (**147**). This compound was prepared according to general procedure F on a 1.2 mmol scale. Purification by silica gel flash column chromatography (1% EtOAc/pentane  $\rightarrow$  10% EtOAc/pentane) yielded the title compound (320 mg, 0.93 mmol, 78%).  $^1H$  NMR (400 MHz,  $CDCl_3$ )  $\delta$  7.13-6.96 (m, 4H), 6.08 (s, 1H), 5.87 (d,  $J = 1.8$  Hz, 1H), 5.47 (d,  $J = 9.0$  Hz, 1H), 5.25-5.19 (m, 1H), 3.07-2.92 (m, 1H), 2.81-2.67 (m, 2H), 2.09-2.01 (m, 1H), 1.99-1.59 (m, 8H), 1.45 (s, 9H).  $^{13}C$  NMR (100 MHz,  $CDCl_3$ )  $\delta$  201.12, 155.89, 142.21, 140.20, 137.13, 129.17, 128.58, 126.00, 125.77, 79.73, 52.45, 41.44, 34.11, 29.73, 28.37, 26.58, 19.53, 17.89. HRMS calculated for  $C_{21}H_{29}NO_3$  344.22202  $[M+H]^+$ ; found 344.22206.

Tert-butyl ((2S,3R)-3-hydroxy-4-methyl-1-((S)-1,2,3,4-tetrahydronaphthalen-1-yl)pent-4-en-2-yl)carbamate (**148**). This compound was prepared according to general procedure G on a 0.93 mmol scale. Purification by silica gel flash column chromatography (5% EtOAc/pentane  $\rightarrow$  30% EtOAc/pentane) yielded the title compound (221 mg, 0.64 mmol, 69%).  $^1H$  NMR (400 MHz,  $CDCl_3$ )  $\delta$  7.17-6.95 (m, 4H), 5.07 (d,  $J = 9.5$  Hz, 1H), 5.00 (s, 1H), 4.91-4.89 (m, 1H), 4.25-4.04 (m, 1H), 4.04-3.83 (m, 1H),

2.92-2.59 (m, 4H), 1.99-1.56 (m, 9H), 1.45 (s, 9H).  $^{13}\text{C}$  NMR (100 MHz,  $\text{CDCl}_3$ )  $\delta$  156.27, 144.80, 141.23, 137.27, 129.10, 128.68, 125.67, 125.50, 112.40, 111.39, 79.51, 77.81, 50.44, 35.43, 33.75, 29.82, 28.49, 26.77, 19.53, 19.49. HRMS calculated for  $\text{C}_{21}\text{H}_{31}\text{NO}_3$  346.23767  $[\text{M}+\text{H}]^+$ ; found 346.23773.

**Boc-1-(S)-TetraNal-EK (149)**. This compound was prepared according to general procedure H on a 0.64 mmol scale. Purification by silica gel flash column chromatography (2% EtOAc/pentane  $\rightarrow$  10% EtOAc/pentane) yielded the title compound (50 mg, 0.14 mmol, 22%).  $^1\text{H}$  NMR (400 MHz,  $\text{CDCl}_3$ )  $\delta$  7.10-6.93 (m, 4H), 4.99 (d,  $J = 9.2$  Hz, 1H), 4.41-4.35 (m, 1H), 3.21 (d,  $J = 5.0$  Hz, 1H), 2.90-2.82 (m, 2H), 2.75-2.55 (m, 2H), 2.03-1.61 (m, 6H), 1.40 (s, 3H), 1.37 (s, 9H).  $^{13}\text{C}$  NMR (100 MHz,  $\text{CDCl}_3$ )  $\delta$  209.23, 156.01, 140.19, 137.48, 129.39, 128.73, 125.95, 125.83, 80.09, 59.17, 52.59, 51.41, 38.79, 34.16, 29.72, 28.45, 26.02, 19.13, 16.87. HRMS calculated for  $\text{C}_{21}\text{H}_{29}\text{NO}_4$  360.21693  $[\text{M}+\text{H}]^+$ ; found 360.21695.  $[\alpha]_{\text{D}}^{20} +116$  (C 1.0,  $\text{CHCl}_3$ ).

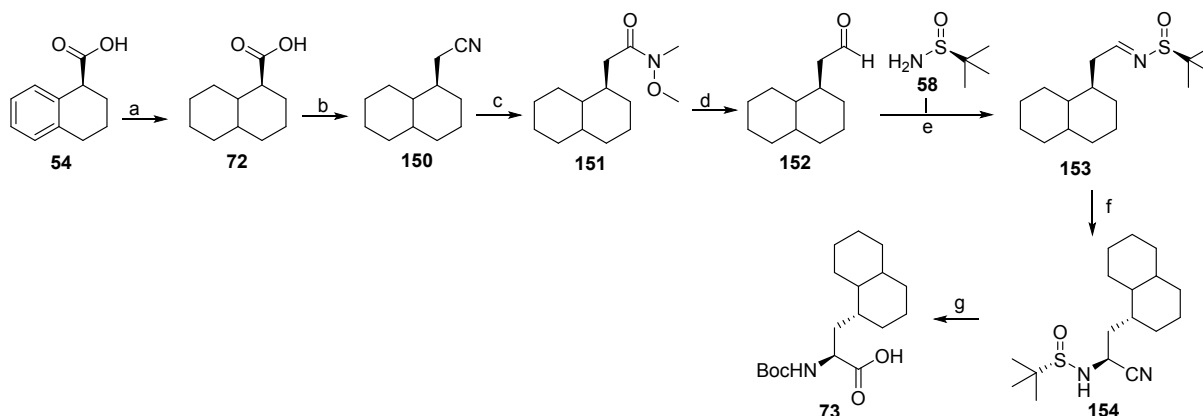

**Scheme S4.** Synthesis of compound **73**. Reagents and conditions: (a)  $\text{PtO}_2/\text{AcOH}$ , 4 bar  $\text{H}_2$ ; (b) i)  $\text{LiAlH}_4/\text{Et}_2\text{O}$ ; ii)  $\text{TsCl}/\text{TEA}/\text{DCM}$ ; iii)  $\text{NaCN}/\text{DMF}$ ; (c) i)  $\text{KOH}/\text{ethylene glycol}$ ; ii)  $\text{N,O}$ -dimethylhydroxylamine hydrochloride,  $\text{HCTU}/\text{DiPEA}/\text{DCM}$ ; (d)  $\text{LiAlH}_4/\text{Et}_2\text{O}$ ; (e) **58**/ $\text{CuSO}_4/\text{DCM}$ ; (f)  $\text{Et}_2\text{AlCN}/i\text{-PrOH}/\text{THF}$ ; (g) i) 6 M  $\text{HCl}$ , reflux; ii)  $\text{Boc}_2\text{O}/\text{TEA}/\text{THF}/\text{H}_2\text{O}$ .

(1S)-decahydronaphthalene-1-carboxylic acid (**72**). (S)-1,2,3,4-tetrahydronaphthalene-1-carboxylic acid **54** (2 g, 11.4 mmol) was dissolved in AcOH, followed by the addition of  $\text{PtO}_2$  (130 mg). The mixture was placed under  $\text{H}_2$  (4 bar, Parr apparatus) for 48 h. The mixture was filtrated through Celite

and concentrated *in vacuo* to give the title product in quantitative yield. <sup>1</sup>H NMR (400 MHz, CDCl<sub>3</sub>) δ 12.12 (s, 1H), 2.50-2.45 (m, 1H), 2.18-2.12 (m, 1H), 1.85-1.16 (m, 15H). <sup>13</sup>C NMR (100 MHz, CDCl<sub>3</sub>) δ 181.96, 47.44, 38.58, 36.79, 32.33, 26.51, 25.48, 24.88, 21.85, 21.48, 20.80. HRMS calculated for C<sub>11</sub>H<sub>18</sub>O<sub>2</sub> 183.13796 [M+H]<sup>+</sup>; found 183.13792.

((1S)-decahydronaphthalen-1-yl)methanol (**150i**). This compound was obtained using the same procedures as described above for the preparation of compound **55i** on a 11.4 mmol scale. Purification by silica gel flash column chromatography (5% EtOAc/pentane → 20% EtOAc/pentane) yielded the title compound (1.1 g, 6.5 mmol, 57%). <sup>1</sup>H NMR (400 MHz, CDCl<sub>3</sub>) δ 3.51-3.36 (m, 2H), 3.14 (s, 1H), 1.86-0.97 (m, 17H). <sup>13</sup>C NMR (100 MHz, CDCl<sub>3</sub>) δ 65.50, 44.18, 37.54, 37.10, 32.61, 26.71, 26.40, 25.81, 23.82, 21.27, 20.05. HRMS calculated for C<sub>11</sub>H<sub>20</sub>O 169.15869 [M+H]<sup>+</sup>; found 169.15840.

((1S)-decahydronaphthalen-1-yl)methyl 4-methylbenzenesulfonate (**150ii**). This compound was obtained using the same procedures as described above for the preparation of compound **55i** on a 6.5 mmol scale. Purification by silica gel flash column chromatography (2% EtOAc/pentane → 10% EtOAc/pentane) yielded the title compound (2.0 g, 6.2 mmol, 95%). <sup>1</sup>H NMR (400 MHz, CDCl<sub>3</sub>) δ 7.82-7.72 (m, 2H), 7.34 (d, J = 8.2 Hz, 2H), 3.92-3.76 (m, 2H), 2.44 (s, 3H), 1.85-0.94 (m, 17H). <sup>13</sup>C NMR (100 MHz, CDCl<sub>3</sub>) δ 144.61, 133.01, 129.75, 127.77, 73.05, 40.76, 36.96, 36.56, 32.28, 26.37, 25.88, 25.26, 23.17, 21.55, 20.99, 19.73. HRMS calculated for C<sub>18</sub>H<sub>26</sub>O<sub>3</sub>S 323.16754 [M+H]<sup>+</sup>; found 323.16807.

2-((1R)-decahydronaphthalen-1-yl)acetonitrile (**150**). This compound was obtained using the same procedures as described above for the preparation of compound **55** on a 6.2 mmol scale. Purification by silica gel flash column chromatography (2% EtOAc/pentane → 10% EtOAc/pentane) yielded the title compound (1.0 g, 5.6 mmol, 90%). <sup>1</sup>H NMR (400 MHz, CDCl<sub>3</sub>) δ 2.44-0.31 (m, 19H). <sup>13</sup>C NMR (100 MHz, CDCl<sub>3</sub>) δ 119.07, 39.27, 38.67, 36.89, 32.06, 26.50, 26.23, 25.97, 24.66, 21.47, 20.85, 19.34. HRMS calculated for C<sub>12</sub>H<sub>19</sub>N 178.15903 [M+H]<sup>+</sup>; found 178.15893.

2-((1R)-decahydronaphthalen-1-yl)-N-methoxy-N-methylacetamide (**151**). This compound was obtained using the same procedures as described above for the preparation of compound 56 on a 5.6 mmol scale. Purification by silica gel flash column chromatography (5% EtOAc/pentane → 30% EtOAc/pentane) yielded the title compound (1.3 g, 5.4 mmol, 96%). <sup>1</sup>H NMR (400 MHz, CDCl<sub>3</sub>) δ 3.68 (s, 3H), 3.18 (s, 3H), 2.35-2.24 (m, 2H), 2.07-1.98 (m, 1H), 1.79-1.06 (m, 16H). <sup>13</sup>C NMR (100 MHz, CDCl<sub>3</sub>) δ 174.17, 61.03, 40.28, 38.03, 37.27, 35.87, 32.42, 26.95, 26.67, 26.45, 25.10, 21.16, 20.16. HRMS calculated for C<sub>14</sub>H<sub>25</sub>NO<sub>2</sub> 240.19581 [M+H]<sup>+</sup>; found 240.19588.

(S)-N-((E)-2-((1R)-decahydronaphthalen-1-yl)ethylidene)-2-methylpropane-2-sulfinamide (**153**). This compound was obtained using the same procedures as described above for the preparation of compound 59 on a 5.4 mmol scale. Purification by silica gel flash column chromatography (2% EtOAc/pentane → 25% EtOAc/pentane) yielded the title compound (1.4 g, 4.9 mmol, 91%). <sup>1</sup>H NMR (400 MHz, CDCl<sub>3</sub>) δ 8.04 (dd, J = 6.0, 4.7 Hz, 1H), 2.54-2.23 (m, 2H), 1.97-1.88 (m, 1H), 1.81-1.03 (m, 25H). <sup>13</sup>C NMR (100 MHz, CDCl<sub>3</sub>) δ 169.82, 56.47, 40.60, 40.03, 39.37, 37.35, 32.50, 27.20, 26.62, 26.55, 25.20, 22.39, 21.16, 19.76. HRMS calculated for C<sub>16</sub>H<sub>29</sub>NOS 284.20426 [M+H]<sup>+</sup>; found 284.20438.

(S)-N-((S)-1-cyano-2-((1R)-decahydronaphthalen-1-yl)ethyl)-2-methylpropane-2-sulfinamide (**154**). This compound was obtained using the same procedures as described above for the preparation of compound 131 on a 4.9 mmol scale. Purification by silica gel flash column chromatography (5% EtOAc/pentane → 50% EtOAc/pentane) yielded the title compound (914 mg, 3.0 mmol, 61%). <sup>1</sup>H NMR (400 MHz, CDCl<sub>3</sub>) δ 4.63 (d, J = 9.0 Hz, 1H), 4.16-4.09 (m, 1H), 1.89-1.04 (m, 28H). <sup>13</sup>C NMR (100 MHz, CDCl<sub>3</sub>) δ 119.87, 56.87, 44.74, 39.30, 38.65, 37.42, 37.09, 32.35, 26.51, 26.44, 26.27, 25.10, 22.43, 21.03, 19.78. HRMS calculated for C<sub>17</sub>H<sub>30</sub>N<sub>2</sub>OS 311.21516 [M+H]<sup>+</sup>; found 311.21511.

Tert-butyl ((S)-3-((1R)-decahydronaphthalen-1-yl)-1-(methoxy(methyl)amino)-1-oxopropan-2-yl)-carbamate (**155**). This compound was obtained using the same procedures as described above for the preparation of compound 146 on a 3.0 mmol scale. Purification by silica gel flash column chromatography (5% EtOAc/pentane → 30% EtOAc/pentane) yielded the title compound (728 mg, 2.0

mmol, 66%). <sup>1</sup>H NMR (400 MHz, CDCl<sub>3</sub>) δ 5.06 (d, J = 9.6 Hz, 1H), 4.70-4.58 (m, 1H), 3.77 (s, 3H), 3.18 (s, 3H), 1.79-1.08 (m, 28H). <sup>13</sup>C NMR (100 MHz, CDCl<sub>3</sub>) δ 173.95, 155.70, 79.39, 61.58, 60.36, 48.37, 38.35, 37.70, 37.29, 36.08, 32.54, 28.33, 28.22, 27.87, 26.74, 25.39, 21.38, 19.39. HRMS calculated for C<sub>20</sub>H<sub>36</sub>N<sub>2</sub>O<sub>4</sub> 369.27478 [M+H]<sup>+</sup>; found 369.27527.

Tert-butyl ((S)-1-((1R)-decahydronaphthalen-1-yl)-4-methyl-3-oxopent-4-en-2-yl)carbamate (**156**). This compound was prepared according to general procedure F on a 2.0 mmol scale. Purification by silica gel flash column chromatography (1% EtOAc/pentane → 10% EtOAc/pentane) yielded the title compound (244 mg, 0.7 mmol, 35%). <sup>1</sup>H NMR (400 MHz, CDCl<sub>3</sub>) δ 6.07 (s, 1H), 5.87 (d, J = 1.8 Hz, 1H), 5.19 (d, J = 8.8 Hz, 1H), 5.07-5.01 (m, 1H), 1.80-1.49 (m, 11H), 1.44 (s, 11H), 1.31-1.20 (m, 6H). <sup>13</sup>C NMR (100 MHz, CDCl<sub>3</sub>) δ 202.04, 155.54, 142.73, 125.77, 79.53, 38.86, 38.20, 37.42, 37.25, 32.54, 28.36, 27.89, 26.80, 26.73, 25.33, 21.37, 20.00, 17.96. HRMS calculated for C<sub>21</sub>H<sub>35</sub>NO<sub>3</sub> 350.26897 [M+H]<sup>+</sup>; found 350.26907. [α]<sub>D</sub><sup>20</sup> +53 (C 1.0, CHCl<sub>3</sub>).

Tert-butyl ((2S,3R)-1-((1R)-decahydronaphthalen-1-yl)-3-hydroxy-4-methylpent-4-en-2-yl)carbamate (**157**). This compound was prepared according to general procedure G on a 0.7 mmol scale. Purification by silica gel flash column chromatography (5% EtOAc/pentane → 30% EtOAc/pentane) gave the title compound in quantitative yield. <sup>1</sup>H NMR (400 MHz, CDCl<sub>3</sub>) δ 5.03 (s, 1H), 4.94 (d, J = 1.6 Hz, 1H), 4.83 (d, J = 9.2 Hz, 1H), 4.18-4.08 (m, 1H), 3.84-3.73 (m, 1H), 2.89 (s, 1H), 1.76-1.71 (m, 7H), 1.64-1.36 (m, 20H), 1.28-1.21 (m, 4H). <sup>13</sup>C NMR (100 MHz, CDCl<sub>3</sub>) δ 156.17, 145.03, 111.36, 79.30, 77.93, 60.49, 50.24, 38.13, 32.64, 31.42, 28.44, 28.39, 26.95, 26.75, 25.57, 21.46, 19.65. HRMS calculated for C<sub>21</sub>H<sub>37</sub>NO<sub>3</sub> 352.28462 [M+H]<sup>+</sup>; found 352.28466.

Boc-1-(R)-DecAla-EK (**158**). This compound was prepared according to general procedure H on a 0.7 mmol scale. Purification by silica gel flash column chromatography (2% EtOAc/pentane → 10% EtOAc/pentane) yielded the title compound (46 mg, 0.13 mmol, 19%). <sup>1</sup>H NMR (400 MHz, CDCl<sub>3</sub>) δ 4.84 (d, J = 8.8 Hz, 1H), 4.32-4.26 (m, 1H), 3.31 (d, J = 5.0 Hz, 1H), 2.89 (d, J = 5.0 Hz, 1H), 1.81-1.63 (m, 5H), 1.62-1.48 (m, 9H), 1.42 (s, 11H), 1.31-1.18 (m, 6H). <sup>13</sup>C NMR (100 MHz, CDCl<sub>3</sub>) δ 210.13,



155.83, 79.88, 59.26, 52.41, 50.69, 38.11, 37.42, 34.88, 32.68, 28.43, 28.13, 26.89, 26.79, 25.48, 21.45, 19.32, 16.88. HRMS calculated for  $C_{21}H_{35}NO_4$  366.26389  $[M+H]^+$ ; found 366.26391.  $[\alpha]_D^{20} +67$  (C 0.3,  $CHCl_3$ ).

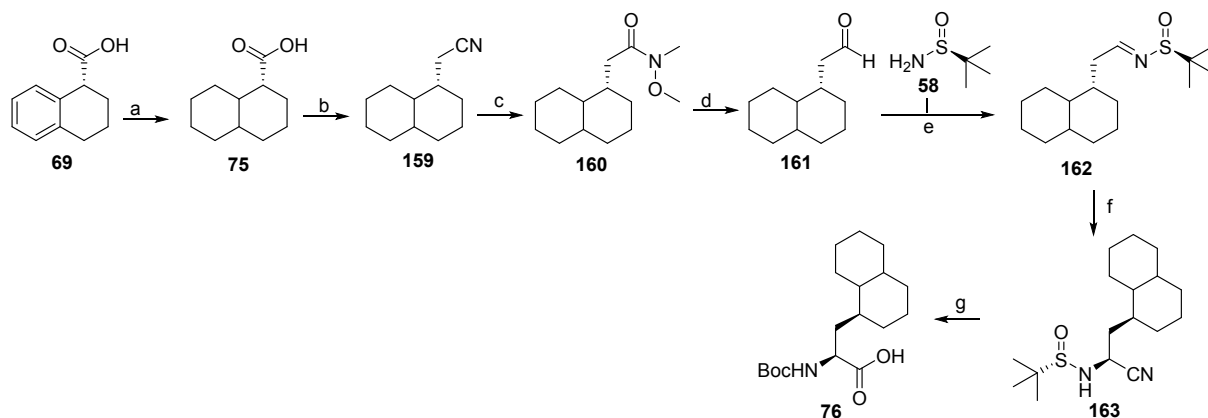

**Scheme S5.** Synthesis of compound **76s**. Reagents and conditions: (a)  $PtO_2/AcOH$ , 4 bar  $H_2$ ; (b) i)  $LiAlH_4/Et_2O$ ; ii)  $TsCl/TEA/DCM$ ; iii)  $NaCN/DMF$ ; (c) i)  $KOH/ethylene\ glycol$ ; ii)  $N,O$ -dimethylhydroxylamine hydrochloride,  $HCTU/DiPEA/DCM$ ; (d)  $LiAlH_4/Et_2O$ ; (e) **58**/ $CuSO_4/DCM$ ; (f)  $Et_2AlCN/i-PrOH/THF$ ; (g) i) 6 M  $HCl$ , reflux; ii)  $Boc_2O/TEA/THF/H_2O$ .

(1R)-decahydronaphthalene-1-carboxylic acid (**158**). This compound was obtained using the same procedures as described above for the preparation of compound **72** on a 11.4 mmol scale.  $^1H$  NMR (400 MHz,  $CDCl_3$ )  $\delta$  2.52-2.46 (m, 1H), 2.18-2.11 (m, 1H), 1.85-1.17 (m, 16H).  $^{13}C$  NMR (100 MHz,  $CDCl_3$ )  $\delta$  182.08, 47.57, 38.76, 36.90, 32.45, 26.62, 25.60, 25.00, 21.99, 21.66, 20.93. HRMS calculated for  $C_{11}H_{18}O_2$  183.13796  $[M+H]^+$ ; found 183.13790.

((1R)-decahydronaphthalen-1-yl)methanol (**159i**). This compound was obtained using the same procedures as described above for the preparation of compound **55i** on a 11.4 mmol scale. Purification by silica gel flash column chromatography (5%  $EtOAc/pentane \rightarrow 20\% EtOAc/pentane$ ) yielded the title compound (1.2 g, 7.1 mmol, 62%).  $^1H$  NMR (400 MHz,  $CDCl_3$ )  $\delta$  3.51-3.37 (m, 2H), 2.90 (s, 1H), 1.83-0.97 (m, 17H).  $^{13}C$  NMR (100 MHz,  $CDCl_3$ )  $\delta$  65.59, 44.23, 37.56, 37.12, 32.63, 26.73, 26.42, 25.83, 23.84, 21.29, 20.09. HRMS calculated for  $C_{11}H_{20}O$  169.15869  $[M+H]^+$ ; found 169.15878.

((1R)-decahydronaphthalen-1-yl)methyl 4-methylbenzenesulfonate (**159ii**). This compound was obtained using the same procedures as described above for the preparation of compound **55ii** on a 7.1 mmol scale. Purification by silica gel flash column chromatography (2% EtOAc/pentane → 10% EtOAc/pentane) yielded the title compound (2.1 g, 6.5 mmol, 92%). <sup>1</sup>H NMR (400 MHz, CDCl<sub>3</sub>) δ 7.77 (d, J = 8.1 Hz, 2H), 7.34 (d, J = 8.1 Hz, 2H), 3.90-3.75 (m, 2H), 2.43 (s, 3H), 1.84-0.93 (m, 16H). <sup>13</sup>C NMR (100 MHz, CDCl<sub>3</sub>) δ 144.52, 132.92, 129.67, 127.66, 72.92, 40.67, 36.87, 36.47, 32.19, 26.28, 25.79, 25.17, 23.06, 21.42, 20.90, 19.62. HRMS calculated for C<sub>18</sub>H<sub>26</sub>O<sub>3</sub>S 323.16754 [M+H]<sup>+</sup>; found 323.16734.

2-((1S)-decahydronaphthalen-1-yl)acetonitrile (**159**). This compound was obtained using the same procedures as described above for the preparation of compound **55** on a 6.5 mmol scale. Purification by silica gel flash column chromatography (2% EtOAc/pentane → 10% EtOAc/pentane) yielded the title compound (1.1 g, 6.2 mmol, 95%). <sup>1</sup>H NMR (400 MHz, CDCl<sub>3</sub>) δ 2.22 (d, J = 7.7 Hz, 2H), 1.89-1.07 (m, 17H). <sup>13</sup>C NMR (100 MHz, CDCl<sub>3</sub>) δ 119.28, 39.39, 38.80, 37.01, 32.18, 26.65, 26.34, 26.09, 24.78, 21.64, 20.97, 19.48. HRMS calculated for C<sub>12</sub>H<sub>19</sub>N 178.15903 [M+H]<sup>+</sup>; found 178.15897.

2-((1S)-decahydronaphthalen-1-yl)-N-methoxy-N-methylacetamide (**160**). This compound was obtained using the same procedures as described above for the preparation of compound **56** on a 6.2 mmol scale. Purification by silica gel flash column chromatography (5% EtOAc/pentane → 30% EtOAc/pentane) yielded the title compound (1.4 g, 5.8 mmol, 94%). <sup>1</sup>H NMR (400 MHz, CDCl<sub>3</sub>) δ 3.68 (s, 3H), 3.18 (s, 3H), 2.33-2.24 (m, 2H), 2.07-1.98 (m, 1H), 1.79-1.07 (m, 16H). <sup>13</sup>C NMR (100 MHz, CDCl<sub>3</sub>) δ 174.12, 61.03, 40.28, 38.03, 37.27, 35.86, 32.42, 26.95, 26.67, 26.45, 25.10, 21.16, 20.16. HRMS calculated for C<sub>14</sub>H<sub>25</sub>NO<sub>2</sub> 240.19581 [M+H]<sup>+</sup>; found 240.19582.

(S)-N-((E)-2-((1S)-decahydronaphthalen-1-yl)ethylidene)-2-methylpropane-2-sulfinamide (**162**). This compound was obtained using the same procedures as described above for the preparation of compound **59** on a 5.8 mmol scale. Purification by silica gel flash column chromatography (2% EtOAc/pentane → 25% EtOAc/pentane) yielded the title compound (1.5 g, 5.3 mmol, 91%). <sup>1</sup>H NMR (400 MHz, CDCl<sub>3</sub>)

$\delta$  8.05 (t,  $J = 5.2$  Hz, 1H), 2.52-2.31 (m, 2H), 1.94-1.86 (m, 1H), 1.79-1.07 (m, 25H).  $^{13}\text{C}$  NMR (100 MHz,  $\text{CDCl}_3$ )  $\delta$  169.65, 56.43, 40.13, 39.34, 37.35, 32.49, 27.15, 26.65, 26.51, 25.16, 22.34, 21.17, 19.84. HRMS calculated for  $\text{C}_{16}\text{H}_{29}\text{NOS}$  284.20426  $[\text{M}+\text{H}]^+$ ; found 284.20437.

(S)-N-((S)-1-cyano-2-((1S)-decahydronaphthalen-1-yl)ethyl)-2-methylpropane-2-sulfinamide (**163**).

This compound was obtained using the same procedures as described above for the preparation of compound **60** on a 5.3 mmol scale. Purification by silica gel flash column chromatography (5% EtOAc/pentane  $\rightarrow$  50% EtOAc/pentane) yielded the title compound (1.0 g, 3.2 mmol, 60%).  $^1\text{H}$  NMR (400 MHz,  $\text{CDCl}_3$ )  $\delta$  4.59 (d,  $J = 8.7$  Hz, 1H), 4.17-4.07 (m, 1H), 1.90-1.04 (m, 28H).  $^{13}\text{C}$  NMR (100 MHz,  $\text{CDCl}_3$ )  $\delta$  119.86, 56.92, 44.32, 39.20, 38.58, 37.39, 37.12, 32.32, 26.55, 26.35, 26.26, 25.17, 22.47, 21.05, 19.70. HRMS calculated for  $\text{C}_{17}\text{H}_{30}\text{N}_2\text{OS}$  311.21516  $[\text{M}+\text{H}]^+$ ; found 311.21509.

Tert-butyl ((S)-3-((1S)-decahydronaphthalen-1-yl)-1-(methoxy(methyl)amino)-1-oxopropan-2-yl)-carbamate (**164**). This compound was obtained using the same procedures as described above for the preparation of compound **146** on a 3.2 mmol scale. Purification by silica gel flash column chromatography (5% EtOAc/pentane  $\rightarrow$  30% EtOAc/pentane) yielded the title compound (934 mg, 2.5 mmol, 61%).  $^1\text{H}$  NMR (400 MHz,  $\text{CDCl}_3$ )  $\delta$  5.16 (d,  $J = 9.5$  Hz, 1H), 4.71-4.66 (m, 1H), 3.77 (s, 3H), 3.19 (s, 3H), 1.80-1.08 (m, 28H).  $^{13}\text{C}$  NMR (100 MHz,  $\text{CDCl}_3$ )  $\delta$  174.11, 155.82, 79.37, 61.55, 48.76, 41.83, 37.82, 37.77, 37.61, 32.57, 28.34, 28.24, 26.85, 26.62, 25.81, 25.44, 21.29, 20.24. HRMS calculated for  $\text{C}_{20}\text{H}_{36}\text{N}_2\text{O}_4$  369.27478  $[\text{M}+\text{H}]^+$ ; found 369.27509.

Tert-butyl ((S)-1-((1S)-decahydronaphthalen-1-yl)-4-methyl-3-oxopent-4-en-2-yl)carbamate (**165**).

This compound was prepared according to general procedure F on a 2.5 mmol scale. Purification by silica gel flash column chromatography (1% EtOAc/pentane  $\rightarrow$  10% EtOAc/pentane) yielded the title compound (639 mg, 1.8 mmol, 72%).  $^1\text{H}$  NMR (400 MHz,  $\text{CDCl}_3$ )  $\delta$  6.08 (s, 1H), 5.87 (d,  $J = 1.8$  Hz, 1H), 5.30 (d,  $J = 9.1$  Hz, 1H), 5.15-5.04 (m, 1H), 1.90 (s, 3H), 1.83-1.00 (m, 28H).  $^{13}\text{C}$  NMR (100 MHz,  $\text{CDCl}_3$ )  $\delta$  201.45, 155.58, 142.09, 125.93, 79.25, 52.18, 41.71, 38.82, 38.00, 37.55, 32.47, 28.22, 26.74,

26.53, 25.88, 25.31, 21.19, 20.14, 17.74. HRMS calculated for  $C_{21}H_{35}NO_3$  350.26897  $[M+H]^+$ ; found 350.26903.  $[\alpha]_D^{20} +75$  (C 1.0,  $CHCl_3$ ).

Tert-butyl ((2S,3R)-1-((1S,4aS,8aS)-decahydronaphthalen-1-yl)-3-hydroxy-4-methylpent-4-en-2-yl)-carbamate (**166**). This compound was prepared according to general procedure G on a 1.4 mmol scale. Purification by silica gel flash column chromatography (5% EtOAc/pentane  $\rightarrow$  30% EtOAc/pentane) gave the title compound in quantitative yield.  $^1H$  NMR (400 MHz,  $CDCl_3$ )  $\delta$  5.03 (s, 1H), 4.91 (s, 1H), 4.86 (d,  $J = 8.0$  Hz, 1H), 4.17-4.08 (m, 1H), 3.84-3.78 (m, 1H), 3.01 (s, 1H), 1.77-1.73 (m, 5H), 1.65-1.08 (m, 26H).  $^{13}C$  NMR (100 MHz,  $CDCl_3$ )  $\delta$  156.25, 144.96, 111.20, 79.24, 77.81, 50.72, 42.33, 37.90, 37.81, 32.80, 32.66, 28.42, 26.96, 26.74, 25.90, 25.55, 21.39, 20.37, 19.51. HRMS calculated for  $C_{21}H_{37}NO_3$  352.28462  $[M+H]^+$ ; found 352.28465.

Boc-1-(S)-DecAla-EK (**167**). This compound was prepared according to general procedure H on a 1.4 mmol scale. Purification by silica gel flash column chromatography (2% EtOAc/pentane  $\rightarrow$  10% EtOAc/pentane) yielded the title compound (17 mg, 47  $\mu$ mol, 3%).  $^1H$  NMR (400 MHz,  $CDCl_3$ )  $\delta$  4.82 (d,  $J = 8.9$  Hz, 1H), 4.30-4.25 (m, 1H), 3.28 (d,  $J = 5.0$  Hz, 1H), 2.88 (d,  $J = 5.1$  Hz, 1H), 1.81-1.54 (m, 9H), 1.51 (s, 4H), 1.42 (s, 9H), 1.30-1.17 (m, 9H).  $^{13}C$  NMR (101 MHz,  $CDCl_3$ )  $\delta$  209.85, 155.88, 79.91, 59.11, 52.52, 51.33, 42.19, 38.32, 37.76, 36.52, 32.67, 29.84, 28.45, 26.94, 26.63, 25.80, 25.50, 21.39, 20.38, 16.92. HRMS calculated for  $C_{21}H_{35}NO_4$  366.26389  $[M+H]^+$ ; found 366.26393.  $[\alpha]_D^{20} +66$  (C 0.3,  $CHCl_3$ ).

cis-cis-Decahydro-1-naphthoic acid (**79ab**). The title compound was prepared according to the literature procedure<sup>7</sup> on a 11.6 mmol scale in quantitative yield.  $^1H$  NMR (400 MHz,  $CDCl_3$ )  $\delta$  11.68 (s, 1H), 2.51-2.46 (m, 1H), 2.23-2.07 (m, 1H), 1.86-1.17 (m, 15H).  $^{13}C$  NMR (100 MHz,  $CDCl_3$ )  $\delta$  182.20, 47.55, 38.72, 36.87, 32.42, 26.59, 25.57, 24.97, 21.95, 21.61, 20.90. HRMS calculated for  $C_{11}H_{18}O_2$  183.13796  $[M+H]^+$ ; found 183.13790.

(1-decahydronaphthalen-1-yl)methanol (**80i**). This compound was obtained using the same procedures as described above for the preparation of compound **55i** on a 11.6 mmol scale. Purification by silica gel flash column chromatography (5% EtOAc/pentane → 20% EtOAc/pentane) yielded the title compound (1.8 g, 10.7 mmol, 92%). <sup>1</sup>H NMR (400 MHz, CDCl<sub>3</sub>) δ 3.86 (s, 1H), 3.48-3.34 (m, 2H), 1.89-0.94 (m, 16H). <sup>13</sup>C NMR (100 MHz, CDCl<sub>3</sub>) δ 65.18, 44.02, 37.44, 37.04, 32.52, 26.62, 26.32, 25.73, 23.73, 21.18, 19.93.

(1-decahydronaphthalen-1-yl)methyl 4-methylbenzenesulfonate (**80ii**). This compound was obtained using the same procedures as described above for the preparation of compound **55ii** on a 10.7 mmol scale. Purification by silica gel flash column chromatography (2% EtOAc/pentane → 10% EtOAc/pentane) yielded the title compound (3.3 g, 10.2 mmol, 95%). <sup>1</sup>H NMR (400 MHz, CDCl<sub>3</sub>) δ 7.81-7.72 (m, 2H), 7.39-7.30 (m, 2H), 3.92-3.69 (m, 2H), 2.44 (s, 3H), 1.84-0.91 (m, 16H). <sup>13</sup>C NMR (100 MHz, CDCl<sub>3</sub>) δ 144.59, 132.98, 129.73, 127.74, 73.02, 40.74, 36.94, 36.54, 32.26, 26.35, 25.86, 25.24, 23.14, 21.52, 20.97, 19.71. HRMS calculated for C<sub>18</sub>H<sub>26</sub>O<sub>3</sub>S 323.16754 [M+H]<sup>+</sup>; found 323.16743.

2-((1-decahydronaphthalen-1-yl)acetonitrile (**80**). This compound was obtained using the same procedures as described above for the preparation of compound **55** on a 10.2 mmol scale. Purification by silica gel flash column chromatography (2% EtOAc/pentane → 10% EtOAc/pentane) yielded the title compound (1.5 g, 8.5 mmol, 83%). <sup>1</sup>H NMR (400 MHz, CDCl<sub>3</sub>) δ 2.46-0.39 (m, 19H). <sup>13</sup>C NMR (100 MHz, CDCl<sub>3</sub>) δ 119.12, 39.30, 38.70, 36.92, 32.09, 26.54, 26.26, 26.00, 24.70, 21.51, 20.89, 19.38. HRMS calculated for C<sub>12</sub>H<sub>19</sub>N 178.15903 [M+H]<sup>+</sup>; found 178.15895.

2-(1-decahydronaphthalen-1-yl)-N-methoxy-N-methylacetamide (**81**). This compound was obtained using the same procedures as described above for the preparation of compound **56** on a 8.5 mmol scale. Purification by silica gel flash column chromatography (5% EtOAc/pentane → 30% EtOAc/pentane) yielded the title compound (1.8 g, 7.5 mmol, 88%). <sup>1</sup>H NMR (400 MHz, CDCl<sub>3</sub>) δ 3.67 (s, 3H), 3.17 (s, 3H), 2.36-2.27 (m, 2H), 2.07-1.97 (m, 1H), 1.77-1.06 (m, 16H). <sup>13</sup>C NMR (100 MHz, CDCl<sub>3</sub>) δ 174.05,

60.87, 40.15, 37.89, 37.16, 32.30, 26.82, 26.55, 26.33, 24.98, 21.03, 20.03. HRMS calculated for  $C_{14}H_{25}NO_2$  240.19581  $[M+H]^+$ ; found 240.19578.

(S)-N-((E)-2-(1-decahydronaphthalen-1-yl)ethylidene)-2-methylpropane-2-sulfinamide (**83**). This compound was obtained using the same procedures as described above for the preparation of compound **59** on a 7.5 mmol scale. Purification by silica gel flash column chromatography (2% EtOAc/pentane → 25% EtOAc/pentane) yielded the title compound (1.8 g, 6.4 mmol, 85%).  $^1H$  NMR (400 MHz,  $CDCl_3$ )  $\delta$  8.08-8.03 (m, 1H), 2.53-2.31 (m, 2H), 1.96-1.86 (m, 1H), 1.79-1.07 (m, 25H).  $^{13}C$  NMR (100 MHz,  $CDCl_3$ )  $\delta$  169.78, 169.68, 56.46, 40.57, 40.50, 40.16, 40.00, 39.36, 37.38, 37.32, 32.51, 32.48, 27.18, 26.67, 26.60, 26.53, 25.18, 22.37, 21.19, 21.14, 19.87, 19.74. HRMS calculated for  $C_{16}H_{29}NOS$  284.20426  $[M+H]^+$ ; found 284.20440.

(S)-N-((S)-1-cyano-2-(1-decahydronaphthalen-1-yl)ethyl)-2-methylpropane-2-sulfinamide (**84**). This compound was obtained using the same procedures as described above for the preparation of compound **60** on a 6.4 mmol scale. Purification by silica gel flash column chromatography (5% EtOAc/pentane → 50% EtOAc/pentane) yielded the title compound (1.5 g, 4.8 mmol, 75%).  $^1H$  NMR (400 MHz,  $CDCl_3$ )  $\delta$  4.63-4.59 (m, 1H), 4.16-4.09 (m, 1H), 1.88-1.04 (m, 28H).  $^{13}C$  NMR (100 MHz,  $CDCl_3$ )  $\delta$  119.87, 119.85, 56.88, 44.76, 44.28, 39.30, 39.20, 38.65, 38.57, 37.42, 37.39, 37.11, 37.09, 32.35, 32.30, 26.54, 26.51, 26.44, 26.33, 26.27, 26.24, 25.16, 25.10, 22.46, 22.44, 21.03, 19.78, 19.68. HRMS calculated for  $C_{17}H_{30}N_2OS$  311.21516  $[M+H]^+$ ; found 311.21511.

Tert-butyl ((S)-3-(1-decahydronaphthalen-1-yl)-1-(methoxy(methyl)amino)-1-oxopropan-2-yl)carbamate (**168**). This compound was obtained using the same procedures as described above for the preparation of compound **146** on a 4.8 mmol scale. Purification by silica gel flash column chromatography (5% EtOAc/pentane → 30% EtOAc/pentane) yielded the title compound (1.1 g, 3.0 mmol, 63%).  $^1H$  NMR (400 MHz,  $CDCl_3$ )  $\delta$  5.29 (d,  $J = 9.3$  Hz, 1H), 4.99 (s, 0.5H), 4.67 (s, 0.5H), 3.78 (s, 3H), 3.20 (s, 3H), 1.81-1.09 (m, 28H).  $^{13}C$  NMR (100 MHz,  $CDCl_3$ )  $\delta$  170.75, 155.54, 79.01, 77.36, 61.36, 60.10, 48.53, 48.14, 41.56, 37.58, 37.43, 37.36, 37.06, 35.70, 32.33, 28.10, 28.03, 27.64, 26.62,

26.52, 26.38, 25.56, 25.18, 21.15, 21.05, 20.75, 19.99, 19.15. HRMS calculated for  $C_{20}H_{36}N_2O_4$  369.27478  $[M+H]^+$ ; found 369.27525.

Tert-butyl ((S)-1-(1-decahydronaphthalen-1-yl)-4-methyl-3-oxopent-4-en-2-yl)carbamate (**85a** and **85b**). These compounds were prepared according to general procedure F on a 3.0 mmol scale. Purification by HPLC (73% MeCN- $H_2O$ ) yielded the two diastereoisomers as two separate fraction. (**85a**: 81 mg, 0.23 mmol, 8%; **85b**: 170 mg, 0.49 mmol, 16%). **85a**:  $^1H$  NMR (400 MHz,  $CDCl_3$ )  $\delta$  6.06 (s, 1H), 5.87 (s, 1H), 5.14 (d,  $J = 8.9$  Hz, 1H), 5.06-5.01 (m, 1H), 1.90 (s, 3H), 1.79-1.07 (m, 28H).  $^{13}C$  NMR (100 MHz,  $CDCl_3$ )  $\delta$  202.17, 155.62, 142.80, 125.87, 79.68, 52.09, 38.97, 38.28, 37.50, 37.36, 32.61, 28.43, 27.96, 26.87, 25.40, 21.44, 20.07, 18.03. HRMS calculated for  $C_{21}H_{35}NO_3$  350.26897  $[M+H]^+$ ; found 350.26913.  $[\alpha]_D^{20} +53$  (C 1,  $CHCl_3$ ). **85b**:  $^1H$  NMR (500 MHz,  $CDCl_3$ )  $\delta$  6.05 (s, 1H), 5.87 (s, 1H), 5.16-4.97 (m, 2H), 1.90 (s, 3H), 1.84-0.98 (m, 28H).  $^{13}C$  NMR (125 MHz,  $CDCl_3$ )  $\delta$  201.88, 155.83, 142.33, 126.28, 79.76, 52.47, 41.96, 39.17, 38.25, 37.77, 32.70, 28.48, 26.97, 26.75, 26.15, 25.52, 21.42, 20.37, 17.99. HRMS calculated for  $C_{21}H_{35}NO_3$  350.26897  $[M+H]^+$ ; found 350.26904.  $[\alpha]_D^{20} +69$  (C 1,  $CHCl_3$ ).

Tert-butyl ((2S,3R)-1-((1R,4aS,8aS)-decahydronaphthalen-1-yl)-3-hydroxy-4-methylpent-4-en-2-yl)-carbamate (**169**). This compound was prepared according to general procedure G on a 0.23 mmol scale starting from compound **85a**. Purification by silica gel flash column chromatography (5% EtOAc/pentane  $\rightarrow$  30% EtOAc/pentane) gave the title compound in quantitative yield.  $^1H$  NMR (400 MHz,  $CDCl_3$ )  $\delta$  5.02 (s, 1H), 4.95 (s, 1H), 4.74 (d,  $J = 8.9$  Hz, 1H), 4.18-4.08 (m, 1H), 3.86-3.76 (m, 1H), 2.56 (s, 1H), 1.76-1.69 (m, 7H), 1.63-1.57 (m, 2H), 1.55-1.36 (m, 18H), 1.29-1.23 (m, 4H).  $^{13}C$  NMR (100 MHz,  $CDCl_3$ )  $\delta$  156.25, 145.07, 111.45, 79.42, 78.04, 50.46, 38.18, 37.93, 37.53, 32.69, 31.55, 29.79, 28.49, 28.41, 28.41, 26.99, 26.80, 25.62, 21.50, 19.70. HRMS calculated for  $C_{21}H_{37}NO_3$  352.28462  $[M+H]^+$ ; found 352.28472.

Tert-butyl ((2S,3R)-1-((1S,4aR,8aR)-decahydronaphthalen-1-yl)-3-hydroxy-4-methylpent-4-en-2-yl)-carbamate (**170**). This compound was prepared according to general procedure G on a 0.49 mmol scale

with compound **85b**. Purification by silica gel flash column chromatography (5% EtOAc/pentane → 30% EtOAc/pentane) gave the title compound in quantitative yield. <sup>1</sup>H NMR (400 MHz, CDCl<sub>3</sub>) δ 5.02 (s, 1H), 4.92 (s, 1H), 4.83 (d, J = 9.2 Hz, 1H), 4.18-4.12 (m, 1H), 3.84-3.79 (m, 1H), 2.76 (s, 1H), 1.76-1.69 (m, 5H), 1.64-1.61 (m, 2H), 1.54-1.35 (m, 18H), 1.30-1.21 (m, 6H). <sup>13</sup>C NMR (100 MHz, CDCl<sub>3</sub>) δ 156.27, 144.99, 111.23, 79.28, 77.85, 60.50, 50.76, 42.34, 37.82, 32.85, 32.68, 28.44, 26.98, 26.75, 25.93, 25.57, 21.41, 20.39, 19.53, 14.22. HRMS calculated for C<sub>21</sub>H<sub>37</sub>NO<sub>3</sub> 352.28462 [M+H]<sup>+</sup>; found 352.28465.

Boc-1-cis-cis-DecAla-EK (**171**). This compound was prepared according to general procedure H on a 0.23 mmol scale. Purification by silica gel flash column chromatography (2% EtOAc/pentane → 10% EtOAc/pentane) yielded the title compound (19 mg, 52 μmol, 23%). <sup>1</sup>H NMR (400 MHz, CDCl<sub>3</sub>) δ 4.83 (d, J = 8.7 Hz, 1H), 4.32-4.26 (m, 1H), 3.31 (d, J = 5.0 Hz, 1H), 2.89 (d, J = 5.0 Hz, 1H), 1.81-1.49 (m, 15H), 1.42 (s, 12H), 1.25-1.16 (m, 4H). <sup>13</sup>C NMR (100 MHz, CDCl<sub>3</sub>) δ 210.15, 155.84, 79.92, 59.28, 52.43, 50.73, 38.24, 38.16, 37.45, 34.93, 32.71, 29.84, 28.45, 28.15, 26.91, 26.82, 25.51, 21.47, 19.35, 16.90. HRMS calculated for C<sub>21</sub>H<sub>35</sub>NO<sub>4</sub> 366.26389 [M+H]<sup>+</sup>; found 366.26401. [α]<sub>D</sub>20 +68 (C 0.3, CHCl<sub>3</sub>).

Boc-1-cis-cis-DecAla-EK (**172**). This compound was prepared according to general procedure H on a 0.49 mmol scale. Purification by silica gel flash column chromatography (2% EtOAc/pentane → 10% EtOAc/pentane) yielded the title compound (49 mg, 0.13 mmol, 27%). <sup>1</sup>H NMR (400 MHz, CDCl<sub>3</sub>) δ 4.84 (d, J = 8.9 Hz, 1H), 4.30-4.25 (m, 1H), 3.28 (d, J = 5.0 Hz, 1H), 2.88 (d, J = 5.1 Hz, 1H), 1.81-1.48 (m, 15H), 1.42 (s, 12H), 1.28-1.22 (m, 4H). <sup>13</sup>C NMR (100 MHz, CDCl<sub>3</sub>) δ 209.80, 155.86, 79.86, 59.08, 52.49, 51.31, 42.16, 38.31, 37.75, 36.50, 32.66, 29.81, 28.43, 26.92, 26.62, 25.79, 25.48, 21.37, 20.36, 16.89. HRMS calculated for C<sub>21</sub>H<sub>35</sub>NO<sub>4</sub> 366.26389 [M+H]<sup>+</sup>; found 366.26391. [α]<sub>D</sub>20 + 95 (C 0.3, CHCl<sub>3</sub>).



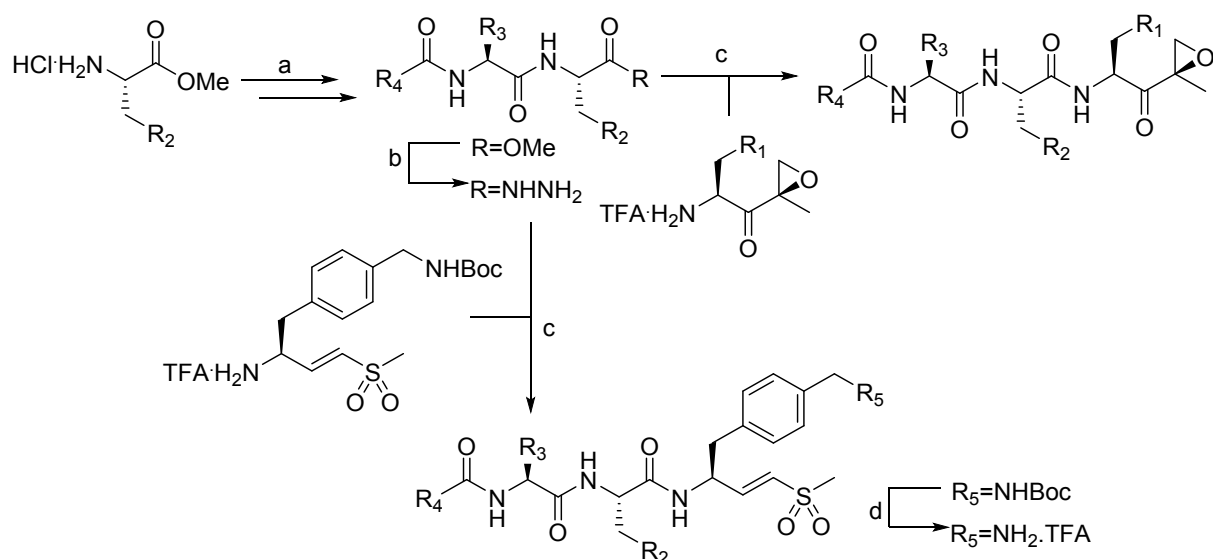

**Scheme S6.** General scheme for the synthesis of peptide-epoxyketones/vinyl sulfone. Reagents and conditions: (a). Sequential peptide coupling and Boc removal. Peptide coupling: HCTU, DiPEA, Boc-AA-OH, DCM. Boc-removal: TFA; (b)  $\text{NH}_2\text{NH}_2\cdot\text{H}_2\text{O}$ , MeOH; (c) i)  $\text{tBuONO}$ , HCl, DMF, DCM,  $-30^\circ\text{C}$ ; ii) amine, DiPEA,  $-30^\circ\text{C} \rightarrow \text{RT}$ ; (d) TFA.

**Boc-Leu-Leu-OMe (173).** This compound was prepared according to general procedure A on a 3.0 mmol scale using Boc-Leu-OH and H-Leu-OMe as starting materials. Purification by silica gel flash column chromatography (5% EtOAc/pentane  $\rightarrow$  10% EtOAc/pentane) yielded the title compound (1.0 g, 2.8 mmol, 93%).  $^1\text{H}$  NMR (400 MHz,  $\text{CDCl}_3$ )  $\delta$  6.53 (d,  $J = 8.3$  Hz, 1H), 4.94 (d,  $J = 8.2$  Hz, 1H), 4.64-4.58 (m, 1H), 4.17-4.05 (m, 1H), 3.73 (s, 3H), 1.68-1.44 (m, 15H), 1.00-0.81 (m, 12H).  $^{13}\text{C}$  NMR (100 MHz,  $\text{CDCl}_3$ )  $\delta$  173.29, 172.37, 155.83, 80.15, 53.02, 52.38, 52.38, 50.69, 41.59, 40.93, 28.38, 24.76, 22.96, 22.24, 21.91. HRMS calculated for  $\text{C}_{18}\text{H}_{34}\text{N}_2\text{O}_5$  359.25405  $[\text{M}+\text{H}]^+$ ; found 359.25405.

**Benz-Leu-Leu-OMe (174).** Compound **173** (125 mg, 0.35 mmol) was deprotected using the general procedure B, followed by the peptide coupling with benzoic acid using general procedure A. Purification by silica gel flash column chromatography (5% EtOAc/pentane  $\rightarrow$  20% EtOAc/pentane) yielded the title compound (110 mg, 0.30 mmol, 94%).  $^1\text{H}$  NMR (400 MHz,  $\text{CDCl}_3$ )  $\delta$  7.83-7.74 (m, 2H), 7.55-7.46 (m, 1H), 7.44-7.40 (m, 2H), 6.82-6.78 (m, 2H), 4.81-4.76 (m, 1H), 4.60-4.55 (m, 1H), 3.74 (s, 3H), 1.84-1.46 (m, 6H), 0.98 (d,  $J = 6.0$  Hz, 6H), 0.87-0.85 (m, 6H).  $^{13}\text{C}$  NMR (100 MHz,  $\text{CDCl}_3$ )  $\delta$  173.22, 172.13,

167.48, 133.93, 131.91, 128.71, 127.19, 52.42, 52.02, 50.97, 41.46, 41.31, 24.96, 24.90, 23.04, 22.84, 22.47, 21.91. HRMS calculated for  $C_{20}H_{30}N_2O_4$  363.22783  $[M+H]^+$ ; found 363.22795.

Benz-Leu-Leu-NH<sub>2</sub> (**175**). The title compound was prepared according to the general C on a 0.35 mmol scale using starting material **174** in quantitative yield.

Pyra-Leu-Leu-OMe (**176**). Compound **173** (90 mg, 0.25 mmol) was deprotected using the general procedure B, followed by the peptide coupling with benzoic acid using general procedure A. Purification by silica gel flash column chromatography (5% EtOAc/pentane → 20% EtOAc/pentane) yielded the title compound (87 mg, 0.24 mmol, 96%). <sup>1</sup>H NMR (400 MHz, CDCl<sub>3</sub>) δ 9.41 (s, 1H), 8.79 (s, 1H), 8.57 (s, 1H), 8.22 (d, J = 7.8 Hz, 1H), 6.71 (d, J = 8.0 Hz, 1H), 4.79-4.73 (m, 1H), 4.63-4.58 (m, 1H), 3.75 (s, 3H), 1.82-1.52 (m, 6H), 1.03-0.75 (m, 12H). <sup>13</sup>C NMR (100 MHz, CDCl<sub>3</sub>) δ 173.28, 171.44, 147.68, 144.52, 144.11, 142.90, 52.45, 51.72, 50.95, 41.46, 24.90, 24.87, 23.03, 22.77, 22.21, 21.99. HRMS calculated for  $C_{18}H_{28}N_4O_4$  365.21833  $[M+H]^+$ ; found 365.21834.

Pyra-Leu-Leu-NH<sub>2</sub> (**177**). The title compound was prepared according to the general C on a 0.24 mmol scale using starting material **176** in quantitative yield.

Phnico-Leu-Leu-OMe (**178**). Compound **173** (89 mg, 0.25 mmol) was deprotected using the general procedure B, followed by the peptide coupling with 6-phenylnicotinic acid using general procedure A. Purification by silica gel flash column chromatography (5% EtOAc/pentane → 30% EtOAc/pentane) yielded the title compound (94 mg, 0.21 mmol, 94%). <sup>1</sup>H NMR (400 MHz, CDCl<sub>3</sub>) δ 9.16 (s, 1H), 8.20 (d, J = 8.0 Hz, 1H), 8.09-7.94 (m, 2H), 7.94-7.63 (m, 2H), 7.48-7.28 (m, 4H), 4.90 (s, 1H), 4.58 (s, 1H), 3.73 (s, 3H), 1.78-1.52 (m, 6H), 0.97-0.80 (m, 12H). <sup>13</sup>C NMR (100 MHz, CDCl<sub>3</sub>) δ 173.21, 159.94, 148.78, 138.31, 136.07, 129.80, 128.90, 127.53, 127.30, 119.94, 52.33, 51.04, 41.19, 41.00, 24.97, 24.88, 22.97, 22.75, 22.28, 21.88. HRMS calculated for  $C_{25}H_{33}N_3O_4$  440.25438  $[M+H]^+$ ; found 440.25398.

Phnico-Leu-Leu-NHNH<sub>2</sub> (**179**). The title compound was prepared according to the general C on a 0.21 mmol scale using starting material 178 in quantitative yield.

Dibenz-Leu-Leu-OMe (**180**). Compound **173** (107 mg, 0.30 mmol) was deprotected using the general procedure B, followed by the peptide coupling with 2,4-dichlorobenzoic acid using general procedure A. Purification by silica gel flash column chromatography (5% EtOAc/pentane → 30% EtOAc/pentane) yielded the title compound (122 mg, 0.28 mmol, 93%). <sup>1</sup>H NMR (400 MHz, CDCl<sub>3</sub>) δ 7.53 (t, J = 1.5 Hz, 1H), 7.32 (d, J = 1.4 Hz, 2H), 6.90 (d, J = 8.3 Hz, 1H), 6.80 (d, J = 8.0 Hz, 1H), 4.80-4.74 (m, 1H), 4.61-4.55 (m, 1H), 3.74 (s, 3H), 1.84-1.45 (m, 6H), 1.03-0.84 (m, 12H). <sup>13</sup>C NMR (100 MHz, CDCl<sub>3</sub>) δ 173.10, 171.36, 165.17, 135.89, 133.24, 131.53, 129.99, 129.16, 52.44, 52.36, 50.95, 41.29, 41.27, 24.88, 24.86, 22.98, 22.87, 22.39, 21.92. HRMS calculated for C<sub>20</sub>H<sub>28</sub>Cl<sub>2</sub>N<sub>2</sub>O<sub>4</sub> 431.14989 [M+H]<sup>+</sup>; found 431.14969.

Dibenz-Leu-Leu-NHNH<sub>2</sub> (**181**). The title compound was prepared according to the general C on a 0.28 mmol scale using starting material 180 in quantitative yield.

Morph-Leu-Leu-OMe (**182**). Compound **173** (101 mg, 0.28 mmol) was deprotected using the general procedure B, followed by the peptide coupling with 2-morpholinoacetic acid using general procedure A. Purification by silica gel flash column chromatography (10% EtOAc/pentane → 30% EtOAc/pentane) yielded the title compound (100 mg, 0.26 mmol, 93%). <sup>1</sup>H NMR (400 MHz, CDCl<sub>3</sub>) δ 7.48 (s, 1H), 6.70-6.52 (m, 1H), 4.58-4.50 (m, 2H), 3.73 (s, 7H), 3.17-2.91 (m, 2H), 2.53 (s, 4H), 1.65-1.52 (m, 6H), 0.97-0.90 (m, 12H). <sup>13</sup>C NMR (100 MHz, CDCl<sub>3</sub>) δ 173.24, 66.99, 53.91, 52.42, 51.14, 50.86, 41.33, 40.90, 24.94, 24.93, 23.02, 22.90, 22.24, 21.92. HRMS calculated for C<sub>19</sub>H<sub>35</sub>N<sub>3</sub>O<sub>5</sub> 386.26495 [M+H]<sup>+</sup>; found 386.26544.

Morph-Leu-Leu-NHNH<sub>2</sub> (**183**). The title compound was prepared according to the general procedure C on a 0.26 mmol scale using starting material **182** in quantitative yield.

Methia-Leu-Leu-OMe (**184**). Compound **173** (100 mg, 0.28 mmol) was deprotected using the general procedure B, followed by the peptide coupling with 2-methylthiazole-5-carboxylic acid using general procedure A. Purification by silica gel flash column chromatography (10% EtOAc/pentane → 50% EtOAc/pentane) yielded the title compound (97 mg, 0.25 mmol, 89%). <sup>1</sup>H NMR (400 MHz, CDCl<sub>3</sub>) δ 8.09 (s, 1H), 7.15 (d, J = 7.8 Hz, 1H), 6.87 (d, J = 7.7 Hz, 1H), 4.69 (d, J = 7.5 Hz, 1H), 4.60-4.55 (m, 1H), 3.74 (s, 3H), 2.73 (s, 3H), 1.81-1.48 (m, 6H), 0.97-0.68 (m, 12H). <sup>13</sup>C NMR (100 MHz, CDCl<sub>3</sub>) δ 173.21, 131.04, 128.93, 52.42, 52.17, 51.02, 41.36, 41.22, 24.91, 22.95, 22.82, 22.27, 21.93. HRMS calculated for C<sub>18</sub>H<sub>29</sub>N<sub>3</sub>O<sub>4</sub>S 384.19515 [M+H]<sup>+</sup>; found 384.19561.

Methia-Leu-Leu-NHNNH<sub>2</sub> (**185**). The title compound was prepared according to the general procedure C on a 0.25 mmol scale using starting material **184** in quantitative yield.

Boc-Phe-Leu-Leu-OMe (**186**). Compound **173** (100 mg, 0.28 mmol) was deprotected using the general procedure B, followed by the peptide coupling with Boc-Phe-OH using general procedure A. Purification by silica gel flash column chromatography (5% EtOAc/pentane → 20% EtOAc/pentane) yielded the title compound (131 mg, 0.26 mmol, 93%). <sup>1</sup>H NMR (400 MHz, CDCl<sub>3</sub>) δ 7.28-7.13 (m, 5H), 6.91 (d, J = 8.0 Hz, 1H), 6.86-6.70 (m, 1H), 5.29 (d, J = 8.0 Hz, 1H), 4.61-4.39 (m, 3H), 3.72 (s, 3H), 3.10-2.98 (m, 2H), 1.72-1.41 (m, 6H), 1.38 (s, 9H), 0.96-0.82 (m, 12H). <sup>13</sup>C NMR (100 MHz, CDCl<sub>3</sub>) δ 173.20, 171.57, 155.60, 136.62, 129.40, 128.64, 126.95, 80.21, 55.64, 52.31, 51.74, 50.80, 41.17, 38.09, 28.31, 24.86, 24.56, 22.86, 22.30, 21.97. HRMS calculated for C<sub>27</sub>H<sub>43</sub>N<sub>3</sub>O<sub>6</sub> 507.32246 [M+H]<sup>+</sup>; found 507.32211.

N<sub>3</sub>Acetyl-Phe-Leu-Leu-OMe (**187**). Compound **186** (131 mg, 0.26 mmol) was deprotected using the general procedure B and the de-protected intermediate was dissolved in DMF, followed by the addition of DiPEA (136 μl, 0.78 mmol, 3.0 eq.) and chloroacetic anhydride (55 mg, 0.32 mmol, 1.2 eq.). The reaction was stirred at r.t. and upon the complete conversion of the deprotected intermediate, sodium azide (25 mg, 0.39 mmol, 1.5 eq.) was added. After stirring at r.t. overnight, the reaction solution was diluted with EtOAc. The organic layer was washed with H<sub>2</sub>O (2×), 1M HCl (1×), sat. aq. NaHCO<sub>3</sub> (2×)

and brine, dried over  $\text{MgSO}_4$  and concentrated *in vacuo*. Purification by silica gel flash column chromatography (5% EtOAc/pentane  $\rightarrow$  35% EtOAc/pentane) yielded the title compound (97 mg, 0.20 mmol, 77%).  $^1\text{H}$  NMR (400 MHz,  $\text{CDCl}_3$ )  $\delta$  7.66-7.49 (m, 2H), 7.39 (d,  $J = 7.6$  Hz, 1H), 7.25-7.21 (s, 3H), 7.16-7.07 (m, 2H), 5.01 (d,  $J = 8.2$  Hz, 1H), 4.70-4.50 (m, 2H), 3.85 (s, 2H), 3.73 (s, 3H), 3.10-2.91 (m, 2H), 1.78-1.40 (m, 6H), 0.95-0.86 (m, 12H).  $^{13}\text{C}$  NMR (100 MHz,  $\text{CDCl}_3$ )  $\delta$  173.16, 136.18, 129.37, 128.65, 127.13, 54.12, 52.36, 52.08, 51.85, 51.07, 41.79, 40.93, 38.97, 25.04, 24.74, 22.95, 22.90, 22.42, 22.08. HRMS calculated for  $\text{C}_{24}\text{H}_{36}\text{N}_6\text{O}_5$  489.28199  $[\text{M}+\text{H}]^+$ ; found 489.28172.

$\text{N}_3\text{Acetyl-Phe-Leu-Leu-NHNH}_2$  (**188**). The title compound was prepared according to the general C on a 0.20 mmol scale using starting material **187** in quantitative yield.

Fmoc-Leu-Ser(tBu)-OMe (**189**). This compound was prepared according to general procedure A on a 0.5 mmol scale using Fmoc-Leu-OH and H-Ser(tBu)-OMe as starting materials. Purification by silica gel flash column chromatography (5% EtOAc/pentane  $\rightarrow$  20% EtOAc/pentane) yielded the title compound (229 mg, 0.44 mmol, 88%).  $^1\text{H}$  NMR (400 MHz,  $\text{CDCl}_3$ )  $\delta$  7.73 (d,  $J = 7.5$  Hz, 2H), 7.59-7.56 (m, 2H), 7.39-7.34 (m, 2H), 7.33-7.21 (m, 2H), 6.89 (d,  $J = 8.0$  Hz, 1H), 5.73 (d,  $J = 8.5$  Hz, 1H), 4.74 (d,  $J = 8.1$  Hz, 1H), 4.41-4.29 (m, 3H), 4.20-4.17 (m, 1H), 3.81-3.78 (m, 1H), 3.71 (s, 3H), 3.55-3.52 (m, 1H), 1.81-1.48 (m, 3H), 1.09 (s, 9H), 0.97-0.93 (m, 6H).  $^{13}\text{C}$  NMR (100 MHz,  $\text{CDCl}_3$ )  $\delta$  170.76, 156.08, 143.87, 141.21, 127.65, 127.03, 125.13, 125.10, 119.93, 119.91, 73.44, 66.97, 61.77, 53.30, 52.78, 52.35, 47.08, 41.91, 27.21, 24.58, 22.96, 22.04. HRMS calculated for  $\text{C}_{29}\text{H}_{38}\text{N}_2\text{O}_6$  511.28026  $[\text{M}+\text{H}]^+$ ; found 511.27996.

H-Leu-Ser(tBu)-OMe (**190**). (complicated NMR due to rotamers) Compound **189** (229 mg, 0.44 mmol) was dissolved in  $\text{Et}_2\text{NH}$  and MeCN (1:1, v/v) and stirred at r.t. The reaction progress was monitored by TLC-MS analysis and upon the complete conversion of the starting material, the reaction solution was concentrated *in vacuo*. Purification by silica gel flash column chromatography (20% EtOAc/pentane  $\rightarrow$  50% EtOAc/pentane, and then 10% MeOH/ EtOAc) yielded the title compound (106 mg, 0.37 mmol, 84%).  $^1\text{H}$  NMR (400 MHz,  $\text{CDCl}_3/\text{MeOD}$ )  $\delta$  4.04-4.02 (m, 1H), 3.97-3.82 (m, 1H), 3.78-3.70 (m, 3H),

3.61-3.57 (m, 1H), 3.46 (s, 1H), 1.96-1.57 (m, 3H), 1.20-1.17 (d, J = 10.4 Hz, 9H), 1.01-0.91 (m, 6H). <sup>13</sup>C NMR (100 MHz, CDCl<sub>3</sub>/MeOD) δ 176.08, 170.91, 169.56, 167.02, 73.70, 73.49, 62.52, 61.62, 55.78, 53.08, 52.52, 52.09, 44.36, 43.64, 26.91, 26.81, 24.42, 23.62, 22.83, 22.71, 21.23, 20.71. HRMS calculated for C<sub>14</sub>H<sub>28</sub>N<sub>2</sub>O<sub>4</sub> 289.21218 [M+H]<sup>+</sup>; found 289.21216.

N<sub>3</sub>Phe-Leu-Ser(tBu)-OMe (**191**). This compound was prepared according to general procedure A on a 0.22 mmol scale through coupling **190** and (S)-2-azido-3-phenylpropanoic acid. Purification by silica gel flash column chromatography (5% EtOAc/pentane → 20% EtOAc/pentane) yielded the title compound (42 mg, 0.09 mmol, 41%). <sup>1</sup>H NMR (400 MHz, CDCl<sub>3</sub>) δ 7.39-7.17 (m, 5H), 6.72 (d, J = 8.5 Hz, 1H), 6.58 (d, J = 8.3 Hz, 1H), 4.68-4.65 (m, 1H), 4.25-4.22 (m, 1H), 3.84-3.81 (m, 1H), 3.74 (s, 3H), 3.56-3.53 (m, 1H), 3.35-3.30 (m, 1H), 3.09-3.04 (m, 1H), 1.64-1.32 (m, 3H), 1.14 (s, 9H), 0.91-0.89 (m, 6H). <sup>13</sup>C NMR (100 MHz, CDCl<sub>3</sub>) δ 171.38, 170.72, 168.26, 136.01, 129.69, 128.76, 127.37, 73.71, 65.52, 61.78, 52.96, 52.57, 51.56, 41.63, 38.49, 29.83, 27.40, 24.56, 22.98, 22.22. HRMS calculated for C<sub>23</sub>H<sub>35</sub>N<sub>5</sub>O<sub>5</sub> 462.27110 [M+H]<sup>+</sup>; found 462.27079.

N<sub>3</sub>Phe-Leu-Ser(tBu)-NHNH<sub>2</sub> (**192**). Compound **191** (42 mg, 0.09 mmol) was dissolved in MeOH, followed by the addition of hydrazine monohydrate (132 μl, 2.7 mmol, 30 eq.). The reaction mixture was refluxed until TLC-MS analysis showed complete conversion of the starting material. The reaction mixture was concentrated *in vacuo* and co-evaporated with toluene (3x) to give the product in a quantitative yield. The product was directly used in next step without any further purification.

Boc-Leu-Leu(4-F)-OMe (**193**). Boc-Leu(4-F)-OH<sup>8</sup> (125 mg, 0.5 mmol) was dissolved in MeOH and cooled to 0 °C, followed by the addition of SOCl<sub>2</sub> (109 μl, 1.5 mmol, 3.0 eq.). After stirring at r.t. overnight, the reaction mixture was concentrated *in vacuo* and co-evaporated with toluene (3x) to give the H-Leu(4-F)-OMe hydrochloride salt which was directly coupled with Boc-Leu-OH according to general procedure A. Purification by silica gel flash column chromatography (5% EtOAc/pentane → 20% EtOAc/pentane) yielded the title compound (139 mg, 0.37 mmol, 74%). <sup>1</sup>H NMR (400 MHz, CDCl<sub>3</sub>) δ 6.96 (s, 1H), 5.09 (d, J = 8.6 Hz, 1H), 4.70-4.65 (m, 1H), 4.17 (d, J = 7.6 Hz, 1H), 3.73 (s,

3H), 2.27-1.95 (m, 2H), 1.66-1.63 (m, 1H), 1.44-1.42 (m, 12H), 1.37 (d, J = 6.3 Hz, 3H), 0.95-0.92 (m, 6H). <sup>13</sup>C NMR (100 MHz, CDCl<sub>3</sub>) δ 172.36, 155.63, 95.74, 94.09, 79.92, 52.95, 52.44, 49.50, 42.45, 42.23, 41.10, 28.32, 27.21, 26.79, 26.54, 24.69, 22.91, 22.14. HRMS calculated for C<sub>18</sub>H<sub>33</sub>FN<sub>2</sub>O<sub>5</sub> 377.24463 [M+H]<sup>+</sup>; found 377.24456.

N<sub>3</sub>Phe-Leu-Leu(4-F)-OMe (**194**). Compound **193** (139 mg, 0.37 mmol) was deprotected using the general procedure B, followed by the peptide coupling with (S)-2-azido-3-phenylpropanoic acid using general procedure A. Purification by silica gel flash column chromatography (5% EtOAc/pentane → 25% EtOAc/pentane) yielded the title compound (118 mg, 0.26 mmol, 70%). <sup>1</sup>H NMR (400 MHz, CDCl<sub>3</sub>) δ 7.33-7.20 (m, 6H), 6.82-6.80 (m, 1H), 6.70 (d, J = 8.5 Hz, 1H), 4.69-4.64 (m, 1H), 4.50-4.44 (m, 1H), 4.26-4.22 (m, 1H), 3.73 (s, 3H), 3.32-3.28 (m, 1H), 3.07-3.01 (m, 1H), 2.22-1.99 (m, 2H), 1.65-1.57 (m, 1H), 1.42 (d, J = 4.2 Hz, 3H), 1.36 (d, J = 4.1 Hz, 3H), 0.89-0.86 (m, 6H). <sup>13</sup>C NMR (100 MHz, CDCl<sub>3</sub>) δ 172.23, 171.22, 168.71, 135.98, 129.60, 128.69, 127.29, 96.03, 94.38, 65.46, 52.60, 51.33, 49.69, 42.16, 41.95, 40.64, 38.36, 27.59, 27.34, 26.37, 26.13, 24.49, 22.94, 22.13. HRMS calculated for C<sub>22</sub>H<sub>32</sub>FN<sub>5</sub>O<sub>4</sub> 450.25111 [M+H]<sup>+</sup>; found 450.25091.

N<sub>3</sub>Phe-Leu-Leu(4-F)-NHNH<sub>2</sub> (**195**). The title compound was prepared according to the general C on a 0.26 mmol scale using starting material **59** in quantitative yield.

Boc-Leu-Ser(Me)-OMe (**196**). Boc-Ser(Me)-OH (219 mg, 1.0 mmol) was dissolved in MeOH and cooled to 0 °C, followed by the addition of SOCl<sub>2</sub> (218 μl, 3.0 mmol, 3.0 eq.). After stirring at r.t. overnight, the reaction mixture was concentrated *in vacuo* and co-evaporated with toluene (3x) to give the H-Ser(Me)-OMe hydrochloride salt. The obtained building block was directly coupled with Boc-Leu-OH according to general procedure A. Purification by silica gel flash column chromatography (5% EtOAc/pentane → 20% EtOAc/pentane) yielded the title compound (175 mg, 0.51 mmol, 51%). <sup>1</sup>H NMR (400 MHz, CDCl<sub>3</sub>) δ 6.92 (d, J = 8.3 Hz, 1H), 5.12 (d, J = 8.5 Hz, 1H), 4.74-4.70 (m, 1H), 4.25-4.19 (m, 1H), 3.85-3.82 (m, 1H), 3.76 (s, 3H), 3.60-3.57 (m, 1H), 3.34 (s, 3H), 1.78-1.60 (m, 2H), 1.55-1.48 (m, 1H), 1.45 (s, 9H), 0.96-0.92 (m, 6H). <sup>13</sup>C NMR (100 MHz, CDCl<sub>3</sub>) δ 172.71, 170.54, 155.61,

79.92, 72.11, 59.31, 53.00, 52.57, 41.58, 28.34, 24.71, 23.02, 22.01. HRMS calculated for  $C_{16}H_{30}N_2O_6$  347.21766  $[M+H]^+$ ; found 347.21775.

$N_3$ Phe-Leu-Ser(Me)-OMe (**197**). Compound **196** (175 mg, 0.51 mmol) was deprotected using the general procedure B, followed by peptide coupling with (S)-2-azido-3-phenylpropanoic acid using general procedure A. Purification by silica gel flash column chromatography (5% EtOAc/pentane  $\rightarrow$  20% EtOAc/pentane) yielded the title compound (250 mg, 0.45 mmol, 94%).  $^1H$  NMR (400 MHz,  $CDCl_3$ )  $\delta$  7.34-7.20 (m, 5H), 7.09 (d,  $J = 8.3$  Hz, 1H), 6.89 (d,  $J = 8.6$  Hz, 1H), 4.73-4.69 (m, 1H), 4.65-4.59 (m, 1H), 4.25-4.22 (m, 1H), 3.84-3.80 (m, 1H), 3.75 (s, 3H), 3.57-3.54 (m, 1H), 3.33-3.28 (m, 4H), 3.08-3.02 (m, 1H), 1.66-1.38 (m, 3H), 0.91-0.88 (m, 6H).  $^{13}C$  NMR (100 MHz,  $CDCl_3$ )  $\delta$  171.70, 170.42, 168.44, 136.06, 129.54, 128.60, 127.19, 72.06, 65.24, 59.27, 52.54, 51.44, 41.66, 38.27, 24.49, 22.90, 22.11. HRMS calculated for  $C_{20}H_{29}N_5O_5$  420.22415  $[M+H]^+$ ; found 420.22390.

$N_3$ Phe-Leu-Ser(Me)-NHNH<sub>2</sub> (**198**). The title compound was prepared according to the general C on a 0.45 mmolscale using starting material **197** in quantitative yield.

Fmoc-Leu-Thr(tBu)-OMe (**199**). This compound was prepared according to general procedure A on a 0.5 mmol scale using Fmoc-Leu-OH and H-Thr(tBu)-OMe as starting materials. Purification by silica gel flash column chromatography (5% EtOAc/pentane  $\rightarrow$  20% EtOAc/pentane) yielded the title compound (255 mg, 0.49 mmol, 98%).  $^1H$  NMR (400 MHz,  $CDCl_3$ )  $\delta$  7.74 (d,  $J = 7.5$  Hz, 2H), 7.62-7.55 (m, 2H), 7.40-7.36 (m, 2H), 7.31-7.27 (m, 2H), 6.62 (d,  $J = 8.4$  Hz, 1H), 5.66-5.46 (m, 1H), 4.52 (d,  $J = 9.1$  Hz, 1H), 4.42-4.33 (m, 3H), 4.22 (d,  $J = 6.8$  Hz, 2H), 3.69 (s, 3H), 1.81-1.48 (m, 3H), 1.16-1.09 (m, 12H), 0.99-0.90 (m, 6H).  $^{13}C$  NMR (100 MHz,  $CDCl_3$ )  $\delta$  171.01, 156.05, 143.95, 143.75, 141.26, 127.68, 127.07, 125.15, 74.17, 67.29, 67.00, 57.79, 53.46, 52.22, 47.14, 42.05, 28.29, 24.61, 22.94, 22.16, 20.92. HRMS calculated for  $C_{30}H_{40}N_3O_6$  525.29591  $[M+H]^+$ ; found 525.29567.

H-Leu-Thr(tBu)-OMe (**200**). This compound was obtained using the same procedures as described above for the preparation of compound **190** on a 0.49 mmol scale. Purification by silica gel flash column



chromatography (20% EtOAc/pentane → 50% EtOAc/pentane, and then 10% MeOH/EtOAc) yielded the title compound (134 mg, 0.44mmol, 90%). <sup>1</sup>H NMR (400 MHz, CDCl<sub>3</sub>) δ 7.74 (d, J = 9.6 Hz, 1H), 4.51-4.48 (m, 1H), 4.27-4.21 (m, 1H), 3.71 (s, 3H), 3.57-3.39 (m, 1H), 1.82-1.62 (m, 4H), 1.44-1.38 (m, 1H), 1.13 (s, 9H), 0.98-0.92 (m, 6H). <sup>13</sup>C NMR (100 MHz, CDCl<sub>3</sub>) δ 176.36, 171.51, 74.03, 67.51, 57.53, 53.73, 52.17, 44.27, 28.39, 24.90, 23.48, 21.43, 20.94. HRMS calculated for C<sub>15</sub>H<sub>30</sub>N<sub>2</sub>O<sub>4</sub> 303.22783 [M+H]<sup>+</sup>; found 303.22803.

N<sub>3</sub>Phe-Leu-Thr(tBu)-OMe (**201**). This compound was prepared according to general procedure A on a 0.17 mmol scale though coupling **200** and (S)-2-azido-3-phenylpropanoic acid. Purification by silica gel flash column chromatography (5% EtOAc/pentane → 20% EtOAc/pentane) yielded the title compound (72 mg, 0.15 mmol, 88%). <sup>1</sup>H NMR (400 MHz, CDCl<sub>3</sub>) δ 7.35-7.20 (m, 5H), 6.78 (d, J = 8.4 Hz, 1H), 6.49 (d, J = 9.1 Hz, 1H), 4.53-4.43 (m, 2H), 4.27-4.20 (m, 2H), 3.71 (s, 3H), 3.35-3.31 (m, 1H), 3.09-3.04 (m, 1H), 1.55-1.45 (m, 3H), 1.17 (d, J = 6.2 Hz, 3H), 1.12 (s, 9H), 0.91 (d, J = 6.1 Hz, 6H). <sup>13</sup>C NMR (100 MHz, CDCl<sub>3</sub>) δ 172.01, 170.98, 168.22, 167.77, 136.02, 129.63, 128.70, 127.29, 74.30, 67.27, 66.27, 65.97, 65.42, 64.40, 57.90, 52.31, 51.67, 41.68, 38.44, 28.38, 24.52, 22.89, 22.24, 21.08. HRMS calculated for C<sub>24</sub>H<sub>37</sub>N<sub>5</sub>O<sub>5</sub> 476.28675 [M+H]<sup>+</sup>; found 476.28641.

N<sub>3</sub>Phe-Leu-Thr(tBu)-NHNH<sub>2</sub> (**202**). Compound **201** (72 mg, 0.15 mmol) was dissolved in MeOH, followed by the addition of hydrazine monohydrate (220 μl, 4.5 mmol, 30 eq.). The reaction solution was refluxed until TLC-MS analysis showed the complete conversion of the starting material. The reaction mixture was concentrated *in vacuo* and co-evaporated with toluene (3x) to give the product in a quantitative yield. The product was directly used in next step without any further purification.

Boc-Leu-Ala(CF<sub>3</sub>)-OMe (**203**). Boc-Ala(CF<sub>3</sub>)-OH<sup>9</sup> (80 mg, 0.31 mmol) was dissolved in MeOH and cooled to 0 °C, followed by the addition of SOCl<sub>2</sub> (68 μl, 0.93 mmol, 3.0 eq.). After stirring at r.t. overnight, the reaction mixture was concentrated *in vacuo* and co-evaporated with toluene (3x) to give the H-Ala(CF<sub>3</sub>)-OMe hydrochloride salt which was directly coupled with Boc-Leu-OH according to general procedure A. Purification by silica gel flash column chromatography (5% EtOAc/pentane →

20% EtOAc/pentane) yielded the title compound (105 mg, 0.27 mmol, 87%). <sup>1</sup>H NMR (400 MHz, CDCl<sub>3</sub>) δ 7.21 (s, 1H), 5.04-4.97 (m, 1H), 4.82-4.75 (m, 1H), 4.18 (s, 1H), 3.78-3.77 (m, 3H), 2.91-2.57 (m, 2H), 1.75-1.60 (m, 2H), 1.52-1.41 (m, 10H), 1.00-0.89 (m, 6H). <sup>13</sup>C NMR (100 MHz, CDCl<sub>3</sub>) δ 170.16, 155.84, 127.07, 124.31, 53.07, 47.38, 40.80, 40.63, 35.63, 35.34, 35.06, 34.78, 28.32, 24.78, 22.96, 21.98. HRMS calculated for C<sub>16</sub>H<sub>27</sub>F<sub>3</sub>N<sub>2</sub>O<sub>5</sub> 385.19448 [M+H]<sup>+</sup>; found 385.19466.

N<sub>3</sub>Phe-Leu-Ala(CF<sub>3</sub>)-OMe (**204**). Compound **203** (105 mg, 0.27 mmol) was deprotected using the general procedure B, followed by the peptide coupling with (S)-2-azido-3-phenylpropanoic acid using general procedure A. Purification by silica gel flash column chromatography (5% EtOAc/pentane → 20% EtOAc/pentane) yielded the title compound (119 mg, 0.26 mmol, 96%). <sup>1</sup>H NMR (400 MHz, CDCl<sub>3</sub>) δ 7.36-7.20 (m, 6H), 6.79-6.72 (m, 1H), 4.80-4.73 (m, 1H), 4.59-4.48 (m, 1H), 4.28-4.25 (m, 1H), 3.78-3.76 (m, 3H), 3.33-3.28 (m, 1H), 3.08-3.02 (m, 1H), 2.88-2.56 (m, 2H), 1.64-1.34 (m, 3H), 0.91-0.85 (m, 6H). <sup>13</sup>C NMR (100 MHz, CDCl<sub>3</sub>) δ 171.67, 171.44, 170.05, 169.98, 168.97, 135.96, 129.63, 128.74, 127.36, 65.31, 53.17, 51.36, 47.41, 40.64, 40.42, 38.30, 35.59, 35.32, 35.02, 34.74, 24.55, 22.92, 22.13. HRMS calculated for C<sub>20</sub>H<sub>26</sub>F<sub>3</sub>N<sub>5</sub>O<sub>4</sub> 458.20097 [M+H]<sup>+</sup>; found 458.20065.

N<sub>3</sub>Phe-Leu-Ala(CF<sub>3</sub>)-NHNH<sub>2</sub> (**205**). The title compound was prepared according to the general C on a 0.26 mmol scale using starting material **204s** in quantitative yield.

Boc-Leu-Gly-OMe (**206**). Boc-Gly-OH (350 mg, 2.0 mmol) was dissolved in MeOH and cooled to 0 °C, followed by the addition of SOCl<sub>2</sub> (0.42 mL, 6.0 mmol, 3.0 eq.). After stirring at r.t. overnight, the reaction mixture was concentrated *in vacuo* and co-evaporated with toluene (3x) to give the H-Gly-OMe hydrochloride salt which was directly coupled with Boc-Leu-OH according to general procedure A. Purification by silica gel flash column chromatography (5% EtOAc/pentane → 20% EtOAc/pentane) yielded the title compound (302 mg, 1.96 mmol, 98%). <sup>1</sup>H NMR (400 MHz, CDCl<sub>3</sub>) δ 7.13 (s, 1H), 5.26 (d, J = 8.5 Hz, 1H), 4.24 (s, J = 7.2, 5.4 Hz, 1H), 4.18-3.89 (m, 2H), 3.74 (s, 3H), 1.80-1.62 (m, 2H), 1.53 (dd, J = 9.4, 5.9 Hz, 1H), 1.44 (s, 9H), 1.26 (s, 1H), 1.07- 0.75 (m, 6H). <sup>13</sup>C NMR (100 MHz,

CDCl<sub>3</sub>)  $\delta$  173.29, 170.23, 155.83, 79.95, 77.45, 77.13, 76.82, 52.25, 41.35, 41.09, 29.69, 28.31, 24.69, 22.97, 21.93. HRMS calculated for C<sub>14</sub>H<sub>26</sub>N<sub>2</sub>O<sub>5</sub> 303.19145 [M+H]<sup>+</sup>; found 303.19147.

N<sub>3</sub>Phe-Leu-Gly-OMe (**207**). Compound **206** (297 mg, 0.98 mmol) was deprotected using the general procedure B, followed by the peptide coupling with (S)-2-azido-3-phenylpropanoic acid using general procedure A. Purification by silica gel flash column chromatography (5% EtOAc/pentane  $\rightarrow$  20% EtOAc/pentane) yielded the title compound (255 mg, 0.67 mmol, 91%). <sup>1</sup>H NMR (400 MHz, CDCl<sub>3</sub>)  $\delta$  7.46-7.10 (m, 7H), 4.50 (dd, J = 8.7, 5.8 Hz, 1H), 4.25 (dd, J = 7.8, 4.2 Hz, 1H), 4.01 (t, J = 5.5 Hz, 2H), 3.74 (s, 3H), 3.31 (dd, J = 14.1, 4.2 Hz, 1H), 3.06 (dd, J = 14.1, 7.8 Hz, 1H), 1.62 (ddd, J = 13.6, 8.2, 5.7 Hz, 1H), 1.53-1.33 (m, 3H), 1.26 (s, 2H), 0.88 (dd, J = 8.4, 6.4 Hz, 6H). <sup>13</sup>C NMR (100 MHz, CDCl<sub>3</sub>)  $\delta$  171.89, 170.12, 168.87, 135.96, 129.62, 128.75, 127.35, 77.48, 77.16, 76.84, 65.26, 52.50, 51.48, 41.25, 40.86, 38.34, 29.80, 24.58, 22.96, 22.16. HRMS calculated for C<sub>18</sub>H<sub>25</sub>N<sub>5</sub>O<sub>4</sub> 376.19793 [M+H]<sup>+</sup>; found 376.19788.

N<sub>3</sub>Phe-Leu-Gly-NHNH<sub>2</sub> (**208**). The title compound was prepared according to the general procedure C on a 0.67 mmol scale using starting material **207** in quantitative yield.

Boc-Leu-Ala-OMe (**209**). This compound was prepared according to general procedure A on a 0.5 mmol scale. Purification by silica gel flash column chromatography (10% EtOAc/pentane  $\rightarrow$  30% EtOAc/pentane) yielded the title compound (123.6 mg, 0.39 mmol, 78%). The analytical data was the same as reported in the literature.<sup>11</sup>

Pyra-Leu-Ala-OMe (**210**). Compound **209** (79 mg, 0.25 mmol) was deprotected using the general procedure B, followed by the peptide coupling with pyrazine-2-carboxylic acid using general procedure A. Purification by silica gel flash column chromatography (5% EtOAc/pentane  $\rightarrow$  30% EtOAc/pentane) yielded the title compound (74 mg, 0.23 mmol, 92%). <sup>1</sup>H NMR (400 MHz, CDCl<sub>3</sub>)  $\delta$  9.40 (d, J = 1.5 Hz, 1H), 8.77 (d, J = 2.5 Hz, 1H), 8.56-8.55 (m, 1H), 8.26 (d, J = 8.7 Hz, 1H), 7.04 (d, J = 7.4 Hz, 1H), 4.81-4.75 (m, 1H), 4.61-4.54 (m, 1H), 3.76 (s, 3H), 1.89-1.65 (m, 3H), 1.39 (d, J = 4.0 Hz, 3H), 0.99-

0.96 (m, 6H).  $^{13}\text{C}$  NMR (100 MHz,  $\text{CDCl}_3$ )  $\delta$  173.22, 171.36, 163.13, 147.53, 144.45, 144.14, 142.86, 52.57, 51.79, 48.21, 41.54, 24.88, 22.98, 22.14, 18.17. HRMS calculated for  $\text{C}_{15}\text{H}_{22}\text{N}_4\text{O}_4$  323.17138  $[\text{M}+\text{H}]^+$ ; found 323.17134.

Pyra-Leu-Ala-NHNH<sub>2</sub> (**211**). The title compound was prepared according to the general procedure C on a 0.23 mmol scale using starting material **210** in quantitative yield.

Methia-Leu-Ser(Me)-OMe (**212**). Compound **196** (295mg, 0.85mmol) was deprotected using the general procedure B, followed by the peptide coupling with 2-methylthiazole-5-carboxylic acid using general procedure A. Purification by silica gel flash column chromatography (20% EtOAc/pentane  $\rightarrow$  65% EtOAc/pentane) yielded the title compound (136 mg, 0.37mmol, 44%).  $^1\text{H}$  NMR (400 MHz,  $\text{CDCl}_3$ )  $\delta$  8.07 (s, 1H), 7.41 (d,  $J = 8.1$  Hz, 1H), 7.06 (d,  $J = 8.2$  Hz, 1H), 4.77-4.71 (m, 2H), 3.85 (dd,  $J = 9.5, 3.1$  Hz, 1H), 3.77 (s, 3H), 3.58 (dd,  $J = 9.5, 3.3$  Hz, 1H), 3.32 (s, 3H), 2.71 (s, 3H), 1.81-1.66 (m, 3H), 0.95-0.93 (m, 6H).  $^{13}\text{C}$  NMR (100 MHz,  $\text{CDCl}_3$ )  $\delta$  172.57, 170.63, 170.50, 160.55, 143.36, 133.87, 71.95, 59.37, 52.75, 52.70, 52.16, 41.51, 24.87, 23.00, 22.03. HRMS calculated for  $\text{C}_{16}\text{H}_{25}\text{N}_3\text{O}_5\text{S}$  372.15877  $[\text{M}+\text{H}]^+$ ; found 372.15873.

Methia-Leu-Ser(Me)-NHNH<sub>2</sub> (**213**). The title compound was prepared according to the general C on a 0.37 mmol scale using starting material **212** in quantitative yield.

Boc-Chg-Leu-OMe (**214**). Boc-Chg-OH was coupled with H-Leu-OMe according to general procedure A on a 0.78 mmol scale. Purification by silica gel flash column chromatography (5% EtOAc/pentane  $\rightarrow$  20% EtOAc/pentane) yielded the title compound (256 mg, 0.67 mmol, 86%).  $^1\text{H}$  NMR (400 MHz,  $\text{CDCl}_3$ )  $\delta$  6.97 (d,  $J = 7.9$  Hz, 1H), 5.43 (d,  $J = 9.2$  Hz, 1H), 4.61-4.55 (m, 1H), 4.04-4.00 (m, 1H), 3.72 (s, 3H), 1.83-1.56 (m, 9H), 1.44 (s, 10H), 1.33-1.01 (m, 5H), 0.93-0.91 (m, 7H).  $^{13}\text{C}$  NMR (100 MHz,  $\text{CDCl}_3$ )  $\delta$  173.01, 171.77, 155.79, 79.37, 59.18, 51.98, 50.68, 40.98, 40.25, 29.36, 28.47, 28.24, 26.12, 25.86, 24.67, 22.65, 21.82. HRMS calculated for  $\text{C}_{20}\text{H}_{36}\text{N}_2\text{O}_5$  385.26970  $[\text{M}+\text{H}]^+$ ; found 385.26996.

Methia-Chg-Leu-OMe (**215**). Compound **214** (256 mg, 0.67 mmol) was deprotected using the general procedure B, followed by the peptide coupling with 2-methylthiazole-5-carboxylic acid using general procedure A. Purification by silica gel flash column chromatography (10% EtOAc/pentane → 50% EtOAc/pentane) yielded the title compound (233 mg, 0.57 mmol, 85%). <sup>1</sup>H NMR (400 MHz, CDCl<sub>3</sub>) δ 8.26 (s, 1H), 8.07-7.96 (m, 2H), 4.69-4.65 (m, 1H), 4.57-4.35 (m, 1H), 3.74 (s, 3H), 2.72 (s, 3H), 2.03-1.48 (m, 9H), 1.32-0.90 (m, 5H), 0.82-0.79 (m, 6H). <sup>13</sup>C NMR (100 MHz, CDCl<sub>3</sub>) δ 172.92, 171.98, 170.22, 160.66, 143.80, 133.91, 58.51, 51.96, 51.21, 40.41, 39.88, 29.49, 29.12, 26.16, 25.81, 24.77, 22.66, 21.66, 19.52. HRMS calculated for C<sub>20</sub>H<sub>31</sub>N<sub>3</sub>O<sub>4</sub>S 410.21080 [M+H]<sup>+</sup>; found 410.21024.

Methia-Chg-Leu-NHNH<sub>2</sub> (**216**). The title compound was prepared according to the general procedure C on a 0.57 mmol scale using starting material **215** in quantitative yield.

Boc-Cha-Leu-OMe (**217**). Boc-Cha-OH was coupled with H-Leu-OMe according to general procedure A on a 1.0 mmol scale. Purification by silica gel flash column chromatography (5% EtOAc/pentane → 20% EtOAc/pentane) yielded the title compound (380 mg, 0.95 mmol, 95%). <sup>1</sup>H NMR (400 MHz, CDCl<sub>3</sub>) δ 6.80 (d, J = 8.1 Hz, 1H), 5.14 (d, J = 8.6 Hz, 1H), 4.63-4.57 (m, 1H), 4.23-4.17 (m, 1H), 3.72 (s, 3H), 1.79-1.53 (m, 9H), 1.44 (s, 9H), 1.30-1.09 (m, 4H), 0.99-0.81 (m, 9H). <sup>13</sup>C NMR (100 MHz, CDCl<sub>3</sub>) δ 173.15, 172.55, 155.74, 79.83, 52.29, 52.17, 50.63, 41.37, 39.70, 33.98, 33.56, 32.82, 28.29, 26.43, 26.23, 26.10, 24.71, 22.83, 21.85. HRMS calculated for C<sub>21</sub>H<sub>38</sub>N<sub>2</sub>O<sub>5</sub> 399.28535 [M+H]<sup>+</sup>; found 399.28477.

Methia-Cha-Leu-OMe (**218**). Compound **217** (279 mg, 0.70 mmol) was deprotected using the general procedure B, followed by the peptide coupling with 2-methylthiazole-5-carboxylic acid using general procedure A. Purification by silica gel flash column chromatography (10% EtOAc/pentane → 50% EtOAc/pentane) yielded the title compound (245 mg, 0.58 mmol, 83%). <sup>1</sup>H NMR (400 MHz, CDCl<sub>3</sub>) δ 8.30 (d, J = 7.9 Hz, 1H), 8.20 (s, 1H), 7.83 (d, J = 7.6 Hz, 1H), 4.87-4.81 (m, 1H), 4.57-4.52 (m, 1H), 3.73 (s, 3H), 2.71 (s, 3H), 1.72-1.54 (m, 10H), 1.49-1.34 (m, 1H), 1.21-1.07 (m, 3H), 0.95-0.74 (m, 8H). <sup>13</sup>C NMR (100 MHz, CDCl<sub>3</sub>) δ 173.13, 172.96, 170.08, 160.71, 144.02, 133.81, 51.94, 51.75, 50.90,

40.64, 39.29, 33.96, 33.29, 32.58, 26.32, 26.02, 25.95, 24.68, 22.61, 21.72, 19.43. HRMS calculated for  $C_{21}H_{33}N_3O_4S$  424.22645  $[M+H]^+$ ; found 424.22580.

Methia-Cha-Leu-NHNH<sub>2</sub> (**219**). The title compound was prepared according to the general procedure C on a 0.58 mmol scale using starting material **218** in quantitative yield.

Boc-HomoCha-Leu-OMe (**220**). Boc-HomoCha-OH was prepared according to the literature procedure,<sup>6</sup> followed by peptide coupling with H-Leu-OMe according to general procedure A on a 1.2 mmol scale. Purification by silica gel flash column chromatography (5% EtOAc/pentane → 20% EtOAc/pentane) yielded the title compound (446 mg, 1.1 mmol, 92%). <sup>1</sup>H NMR (400 MHz, CDCl<sub>3</sub>) δ 7.21 (d, J = 7.9 Hz, 1H), 5.59 (d, J = 8.4 Hz, 1H), 4.60-4.55 (m, 1H), 4.23-4.11 (m, 1H), 3.71 (s, 3H), 1.90-1.51 (m, 10H), 1.44 (s, 9H), 1.35-1.03 (m, 7H), 1.03-0.74 (m, 8H). <sup>13</sup>C NMR (100 MHz, CDCl<sub>3</sub>) δ 172.95, 172.39, 155.60, 79.30, 54.37, 51.85, 50.53, 40.82, 37.36, 33.11, 33.00, 32.81, 29.97, 28.14, 26.42, 26.10, 24.54, 22.61, 21.66. HRMS calculated for  $C_{22}H_{40}N_2O_5$  413.30100  $[M+H]^+$ ; found 413.30059.

Methia-HomoCha-Leu-OMe (**221**). Compound **220** (239 mg, 0.58 mmol) was deprotected using the general procedure B, followed by the peptide coupling with 2-methylthiazole-5-carboxylic acid using general procedure A. Purification by silica gel flash column chromatography (10% EtOAc/pentane → 50% EtOAc/pentane) yielded the title compound (198 mg, 0.45 mmol, 78%). <sup>1</sup>H NMR (500 MHz, CDCl<sub>3</sub>) δ 8.17 (s, 1H), 7.91-7.90 (m, 1H), 7.76-7.56 (m, 1H), 4.80-4.76 (m, 1H), 4.57-4.53 (m, 1H), 3.73 (s, 3H), 2.71 (s, 3H), 1.92-1.45 (m, 10H), 1.39-0.98 (m, 6H), 0.87-0.80 (m, 8H). <sup>13</sup>C NMR (125 MHz, CDCl<sub>3</sub>) δ 172.93, 172.38, 170.26, 160.63, 143.77, 133.78, 53.88, 52.09, 50.98, 40.76, 37.46, 33.23, 33.07, 30.08, 26.52, 26.20, 24.77, 22.66, 21.76, 19.48. HRMS calculated for  $C_{22}H_{35}N_3O_4S$  438.24210  $[M+H]^+$ ; found 438.24170.

Methia-HomoCha-Leu-NHNH<sub>2</sub> (**222**). The title compound was prepared according to the general C on a 0.45 mmol scale using starting material **221** in quantitative yield.

Boc-Cha(4-Me)-Leu-OMe (**223**). Boc-Cha(4-Me)-OH was prepared according to the literature procedure<sup>6</sup> followed by peptide coupling with H-Leu-OMe according to general procedure A on a 1.2 mmol scale. Purification by silica gel flash column chromatography (5% EtOAc/pentane → 20% EtOAc/pentane) yielded the title compound (445 mg, 1.1 mmol, 92%). <sup>1</sup>H NMR (500 MHz, CDCl<sub>3</sub>) δ 7.18-7.15 (m, 1H), 5.49-5.45 (m, 1H), 4.62-4.57 (m, 1H), 4.31-4.17 (m, 1H), 3.72 (s, 3H), 1.73-1.54 (m, 5H), 1.44 (s, 10H), 0.95-0.82 (m, 9H). <sup>13</sup>C NMR (125 MHz, CDCl<sub>3</sub>) δ 172.91, 172.61, 155.63, 79.39, 67.61, 51.87, 50.50, 40.95, 39.62, 36.44, 34.96, 34.85, 33.59, 32.46, 30.55, 30.39, 28.88, 28.12, 24.53, 22.62, 22.46, 21.67. HRMS calculated for C<sub>22</sub>H<sub>40</sub>N<sub>2</sub>O<sub>5</sub> 413.30100 [M+H]<sup>+</sup>; found 413.30064.

Methia-Cha(4-Me)-Leu-OMe (**224**). Compound **223** (288 mg, 0.7 mmol) was deprotected using the general procedure B, followed by peptide coupling with 2-methylthiazole-5-carboxylic acid using general procedure A. Purification by silica gel flash column chromatography (10% EtOAc/pentane → 50% EtOAc/pentane) yielded the title compound (273 mg, 0.62 mmol, 94%). <sup>1</sup>H NMR (400 MHz, CDCl<sub>3</sub>) δ 8.16 (d, J = 2.9 Hz, 1H), 7.94 (d, J = 8.1 Hz, 1H), 7.56-7.48 (m, 1H), 4.85-4.65 (m, 1H), 4.58-4.53 (m, 1H), 3.73 (d, J = 1.1 Hz, 3H), 2.71 (s, 3H), 1.88-1.03 (m, 14H), 0.89-0.76 (m, 10H). <sup>13</sup>C NMR (100 MHz, CDCl<sub>3</sub>) δ 173.07, 173.04, 172.87, 172.85, 170.32, 170.30, 160.79, 160.75, 143.90, 133.83, 77.48, 77.16, 76.84, 52.15, 51.85, 50.99, 40.92, 40.88, 39.51, 36.46, 35.04, 34.96, 33.89, 33.42, 32.69, 32.60, 31.55, 30.66, 30.51, 30.03, 29.04, 28.17, 24.81, 22.71, 22.63, 21.84, 20.22, 19.56. HRMS calculated for C<sub>22</sub>H<sub>35</sub>N<sub>3</sub>O<sub>4</sub>S 438.24210 [M+H]<sup>+</sup>; found 438.24175.

Methia-Cha(4-Me)-Leu-NHNH<sub>2</sub> (**225**). The title compound was prepared according to the general C on a 0.62 mmol scale using starting material **224** in quantitative yield.

Boc-Cha(4-OMe)-Leu-OMe (**226**). Boc-Cha(4-OMe)-OH was prepared according to the literature procedure<sup>6</sup> followed by peptide coupling with H-Leu-OMe according to general procedure A on a 0.9 mmol scale. Purification by silica gel flash column chromatography (5% EtOAc/pentane → 20% EtOAc/pentane) yielded the title compound (365 mg, 0.85 mmol, 94%). <sup>1</sup>H NMR (500 MHz, CDCl<sub>3</sub>) δ

6.83 (d,  $J = 8.0$  Hz, 1H), 5.23 (d,  $J = 8.7$  Hz, 1H), 4.61-4.57 (m, 1H), 4.20-4.17 (m, 1H), 3.72 (s, 3H), 3.41-3.38 (m, 1H), 3.34-3.28 (m, 3H), 1.90-1.61 (m, 5H), 1.59-1.48 (m, 3H), 1.44 (s, 11H), 1.36-1.23 (m, 4H), 0.95-0.90 (m, 6H).  $^{13}\text{C}$  NMR (125 MHz,  $\text{CDCl}_3$ )  $\delta$  173.04, 172.43, 155.73, 79.76, 79.39, 75.16, 55.54, 55.41, 52.11, 50.61, 41.25, 38.81, 33.38, 32.95, 28.93, 28.78, 28.25, 27.33, 26.74, 24.67, 22.78, 21.79. HRMS calculated for  $\text{C}_{22}\text{H}_{40}\text{N}_2\text{O}_6$  429.29591  $[\text{M}+\text{H}]^+$ ; found 429.29573.

Methia-Cha(4-OMe)-Leu-OMe (**227**). Compound **226** (184 mg, 0.43 mmol) was deprotected using the general procedure B, followed by peptide coupling with 2-methylthiazole-5-carboxylic acid using general procedure A. Purification by silica gel flash column chromatography (10% EtOAc/pentane  $\rightarrow$  50% EtOAc/pentane) yielded the title compound (137 mg, 0.30 mmol, 70%).  $^1\text{H}$  NMR (400 MHz,  $\text{CDCl}_3$ )  $\delta$  8.14 (s, 1H), 7.92-7.88 (m, 1H), 7.48-7.43 (m, 1H), 4.81-4.76 (m, 1H), 4.57-4.52 (m, 1H), 3.73 (s, 3H), 3.46-3.14 (m, 4H), 2.71 (s, 3H), 2.12-0.97 (m, 14H), 0.89-0.76 (m, 6H).  $^{13}\text{C}$  NMR (100 MHz,  $\text{CDCl}_3$ )  $\delta$  172.98, 172.94, 172.75, 172.63, 170.46, 160.76, 143.79, 133.78, 133.69, 79.38, 75.21, 55.59, 55.49, 52.23, 52.20, 51.90, 51.72, 51.00, 40.91, 38.75, 33.48, 33.00, 30.68, 28.84, 28.79, 27.36, 26.61, 24.79, 22.70, 21.83, 19.53. HRMS calculated for  $\text{C}_{22}\text{H}_{35}\text{N}_3\text{O}_5\text{S}$  454.23702  $[\text{M}+\text{H}]^+$ ; found 454.23677.

Methia-Cha(4-OMe)-Leu-NHNH<sub>2</sub> (**228**). The title compound was prepared according to general C on a 0.30 mmol scale using starting material **227** in quantitative yield.

Boc-1-DecAla-Leu-OMe (**229**). Boc-1-DecAla-OH was prepared according to the literature procedure<sup>6</sup> followed by peptide coupling with H-Leu-OMe according to general procedure A on a 0.5 mmol scale. Purification by silica gel flash column chromatography (5% EtOAc/pentane  $\rightarrow$  20% EtOAc/pentane) yielded the title compound (202 mg, 0.45 mmol, 90%).  $^1\text{H}$  NMR (400 MHz,  $\text{CDCl}_3$ )  $\delta$  6.68 (s, 1H), 5.10-5.00 (m, 1H), 4.71-4.47 (m, 1H), 4.21-3.99 (m, 1H), 3.72 (s, 3H), 1.96-0.61 (m, 38H).  $^{13}\text{C}$  NMR (100 MHz,  $\text{CDCl}_3$ )  $\delta$  173.28, 173.15, 172.93, 155.80, 79.89, 77.36, 52.22, 50.65, 47.68, 43.14, 43.01, 41.50, 37.77, 37.56, 37.41, 34.50, 34.30, 32.63, 30.23, 28.30, 26.85, 26.78, 26.70, 26.60, 26.44, 26.02,



25.95, 25.45, 24.73, 22.83, 21.93, 21.30, 20.06. HRMS calculated for  $C_{25}H_{44}N_2O_5$  453.33230  $[M+H]^+$ ; found 453.33210.

Methia-1-DecAla-Leu-OMe (**230**). Compound **229** (103 mg, 0.23 mmol) was deprotected using the general procedure B, followed by peptide coupling with 2-methylthiazole-5-carboxylic acid using general procedure A. Purification by silica gel flash column chromatography (5% EtOAc/pentane  $\rightarrow$  20% EtOAc/pentane) yielded the title compound (55 mg, 0.12 mmol, 52%).  $^1H$  NMR (400 MHz,  $CDCl_3$ )  $\delta$  8.22-8.04 (m, 1H), 7.47-7.31 (m, 1H), 7.25-6.93 (m, 1H), 4.78-4.48 (m, 2H), 3.74 (s, 3H), 2.72 (s, 3H), 1.96-0.54 (m, 28H).  $^{13}C$  NMR (100 MHz,  $CDCl_3$ )  $\delta$  173.19, 173.02, 172.96, 172.89, 172.49, 171.97, 170.59, 160.88, 160.78, 160.71, 160.41, 143.68, 133.79, 133.75, 125.97, 120.65, 109.43, 52.56, 52.34, 52.00, 51.67, 51.03, 47.90, 47.75, 43.11, 41.32, 41.23, 40.81, 39.70, 39.41, 38.87, 37.93, 37.86, 37.52, 37.44, 36.70, 36.16, 35.86, 34.93, 34.53, 34.29, 33.26, 32.60, 32.33, 30.28, 27.33, 26.91, 26.72, 26.62, 26.45, 25.95, 25.44, 24.87, 22.77, 21.96, 21.33, 20.08, 19.94, 19.63. HRMS calculated for  $C_{25}H_{39}N_3O_4S$  478.27340  $[M+H]^+$ ; found 478.27332.

Methia-1-DecAla-Leu-NHNH<sub>2</sub> (**231**). The title compound was prepared according to the general procedure C on a 0.12 mmol scale using starting material **230** in quantitative yield.

Boc-2-DecAla-Leu-OMe (**232**). Boc-2-DecAla-OH was prepared according to the literature procedure<sup>6</sup> followed by peptide coupling with H-Leu-OMe according to general procedure A on a 0.5 mmol scale. Purification by silica gel flash column chromatography (5% EtOAc/pentane  $\rightarrow$  20% EtOAc/pentane) yielded the title compound (158 mg, 0.35 mmol, 70%).  $^1H$  NMR (400 MHz,  $CDCl_3$ )  $\delta$  6.82-6.76 (m, 1H), 5.17 (d,  $J = 8.3$  Hz, 1H), 4.63-4.57 (m, 1H), 4.22-4.15 (m, 1H), 3.72 (s, 3H), 1.74-1.16 (m, 31H), 0.92 (d,  $J = 5.8$  Hz, 6H).  $^{13}C$  NMR (100 MHz,  $CDCl_3$ )  $\delta$  173.15, 172.55, 155.74, 79.82, 60.37, 52.37, 52.15, 50.63, 41.37, 39.81, 35.93, 35.79, 35.73, 34.72, 33.79, 32.92, 32.34, 32.22, 32.12, 28.28, 27.00, 26.64, 26.58, 25.70, 24.71, 22.82, 21.86, 20.89. HRMS calculated for  $C_{25}H_{44}N_2O_5$  453.33230  $[M+H]^+$ ; found 453.33200.

Methia-2-DecAla-Leu-OMe (**233**). Compound **232** (158 mg, 0.35 mmol) was deprotected using the general procedure B, followed by peptide coupling with 2-methylthiazole-5-carboxylic acid using general procedure A. Purification by silica gel flash column chromatography (10% EtOAc/pentane → 50% EtOAc/pentane) yielded the title compound (155 mg, 0.32 mmol, 91%). <sup>1</sup>H NMR (400 MHz, CDCl<sub>3</sub>) δ 8.16-8.15 (m, 1H), 7.99-7.94 (m, 1H), 7.56-7.50 (m, 1H), 4.82-4.75 (m, 1H), 4.58-4.53 (m, 1H), 3.73-3.72 (m, 3H), 2.71-2.70 (m, 3H), 1.80-1.09 (m, 21H), 0.91-0.82 (m, 7H). <sup>13</sup>C NMR (100 MHz, CDCl<sub>3</sub>) δ 173.06, 172.88, 170.28, 160.74, 143.90, 133.84, 52.16, 51.86, 50.98, 40.93, 39.84, 35.86, 35.70, 35.65, 34.84, 32.91, 32.28, 32.15, 32.10, 27.77, 27.16, 26.99, 26.57, 25.70, 24.79, 22.69, 21.85, 20.91, 19.53. HRMS calculated for C<sub>25</sub>H<sub>39</sub>N<sub>3</sub>O<sub>4</sub>S 478.27340 [M+H]<sup>+</sup>; found 478.27318.

Methia-2-DecAla-Leu-NHNH<sub>2</sub> (**234**). The title compound was prepared according to the general procedure C on a 0.32 mmol scale using starting material **233** in quantitative yield.

Boc-BiCha-Leu-OMe (**235**). Boc-BiCha-OH was prepared according to the literature procedure<sup>6</sup> followed by peptide coupling with H-Leu-OMe according to general procedure A on a 0.5 mmol scale. Purification by silica gel flash column chromatography (5% EtOAc/pentane → 20% EtOAc/pentane) yielded the title compound (198 mg, 0.41 mmol, 82%). <sup>1</sup>H NMR (400 MHz, CDCl<sub>3</sub>) δ 6.72 (t, J = 7.5 Hz, 1H), 5.08 (d, J = 8.5 Hz, 1H), 4.63-4.57 (m, 1H), 4.16-4.08 (m, 1H), 3.72 (s, 3H), 1.93-0.78 (m, 41H). <sup>13</sup>C NMR (100 MHz, CDCl<sub>3</sub>) δ 173.18, 173.16, 172.51, 155.80, 79.95, 52.87, 52.23, 50.67, 43.32, 41.60, 41.45, 40.18, 34.32, 31.03, 30.58, 30.27, 29.90, 29.81, 29.69, 28.98, 28.32, 26.88, 26.79, 26.77, 25.66, 25.47, 24.75, 22.87, 21.89. HRMS calculated for C<sub>27</sub>H<sub>48</sub>N<sub>2</sub>O<sub>5</sub> 481.36360 [M+H]<sup>+</sup>; found 481.36345.

Methia-BiCha-Leu-OMe (**236**). Compound **235** (101 mg, 0.21 mmol) was deprotected using the general procedure B, followed by the peptide coupling with 2-methylthiazole-5-carboxylic acid using general procedure A. Purification by silica gel flash column chromatography (5% EtOAc/pentane → 20% EtOAc/pentane) yielded the title compound (65 mg, 0.13 mmol, 62%). <sup>1</sup>H NMR (400 MHz, CDCl<sub>3</sub>) δ 8.12-8.11 (m, 1H), 7.51-7.48 (m, 1H), 7.23-7.17 (m, 1H), 4.77-4.68 (m, 1H), 4.59-4.53 (m, 1H), 3.74-

3.73 (m, 3H), 2.71 (s, 3H), 1.96-0.68 (m, 32H).  $^{13}\text{C}$  NMR (100 MHz,  $\text{CDCl}_3$ )  $\delta$  173.09, 173.06, 172.53, 172.49, 170.47, 170.45, 160.76, 160.72, 133.76, 52.30, 52.21, 51.80, 51.05, 43.31, 41.65, 41.09, 40.32, 39.74, 35.91, 34.47, 33.80, 33.13, 31.12, 30.59, 30.31, 30.29, 29.88, 29.77, 29.70, 29.08, 26.91, 26.81, 25.59, 25.45, 24.88, 22.78, 21.93, 19.65. HRMS calculated for  $\text{C}_{27}\text{H}_{43}\text{N}_3\text{O}_4\text{S}$  506.30470  $[\text{M}+\text{H}]^+$ ; found 506.30469.

Methia-BiCha-Leu-NHNH<sub>2</sub> (**237**). The title compound was prepared according to the general procedure C on a 0.13 mmol scale using starting material **236** in quantitative yield.

Boc-Leu-Cha-OMe (**238**). This compound was obtained using the same procedures as described above for the preparation of compound **203** on a 1.5 mmol scale using Boc-Cha-OH and Boc-Leu-OH as starting materials. Purification by silica gel flash column chromatography (5% EtOAc/pentane  $\rightarrow$  20% EtOAc/pentane) yielded the title compound (435 mg, 1.1 mmol, 73%).  $^1\text{H}$  NMR (400 MHz,  $\text{CDCl}_3$ )  $\delta$  7.07 (d,  $J = 8.0$  Hz, 1H), 5.40 (d,  $J = 8.6$  Hz, 1H), 4.64-4.58 (m, 1H), 4.25-4.19 (m, 1H), 3.71 (s, 3H), 1.83-1.59 (m, 8H), 1.44 (s, 11H), 1.29-1.07 (m, 4H), 0.99-0.79 (m, 8H).  $^{13}\text{C}$  NMR (100 MHz,  $\text{CDCl}_3$ )  $\delta$  173.15, 172.52, 155.60, 79.48, 77.36, 52.75, 51.94, 49.89, 41.10, 39.57, 33.82, 33.27, 32.29, 28.19, 26.22, 25.97, 25.81, 24.48, 22.67, 22.08. HRMS calculated for  $\text{C}_{21}\text{H}_{38}\text{N}_2\text{O}_5$  399.28535  $[\text{M}+\text{H}]^+$ ; found 399.28479.

Methia-Leu-Cha-OMe (**239**). Compound **238** (200 mg, 0.50 mmol) was deprotected using the general procedure B, followed by peptide coupling with 2-methylthiazole-5-carboxylic acid using general procedure A. Purification by silica gel flash column chromatography (10% EtOAc/pentane  $\rightarrow$  50% EtOAc/pentane) yielded the title compound (207 mg, 0.49 mmol, 98%).  $^1\text{H}$  NMR (400 MHz,  $\text{CDCl}_3$ )  $\delta$  8.17 (s, 1H), 7.75 (d,  $J = 8.3$  Hz, 1H), 7.41 (d,  $J = 7.7$  Hz, 1H), 4.78-4.72 (m, 1H), 4.60-4.55 (m, 1H), 3.73 (s, 3H), 2.71 (s, 3H), 1.79-1.47 (m, 10H), 1.33-1.26 (m, 1H), 1.18-1.09 (m, 3H), 0.91-0.87 (m, 8H).  $^{13}\text{C}$  NMR (100 MHz,  $\text{CDCl}_3$ )  $\delta$  173.21, 172.44, 170.33, 160.68, 143.69, 133.82, 52.17, 50.37, 40.92, 39.39, 33.98, 33.21, 32.46, 26.29, 25.98, 25.86, 24.77, 22.80, 22.07, 19.47. HRMS calculated for  $\text{C}_{21}\text{H}_{33}\text{N}_3\text{O}_4\text{S}$  424.22645  $[\text{M}+\text{H}]^+$ ; found 424.22604.

Methia-Leu-Cha-NHNH<sub>2</sub> (**240**). The title compound was prepared according to the general procedure C on a 0.49 mmol scale using starting material **239** in quantitative yield.

Boc-Leu-HomoCha-OMe (**241**). This compound was obtained using the same procedures as described above for the preparation of compound **203** on a 1.2 mmol scale using Boc-HomoCha-OH and Boc-Leu-OH as starting materials. Purification by silica gel flash column chromatography (5% EtOAc/pentane → 20% EtOAc/pentane) yielded the title compound (413 mg, 1.0 mmol, 83%). <sup>1</sup>H NMR (400 MHz, CDCl<sub>3</sub>) δ 6.92 (d, J = 7.8 Hz, 1H), 5.23 (d, J = 8.5 Hz, 1H), 4.56-4.51 (m, 1H), 4.22-4.16 (m, 1H), 3.73 (s, 3H), 1.89-1.81 (m, 1H), 1.73-1.61 (m, 8H), 1.44 (s, 11H), 1.29-1.09 (m, 7H), 0.95-0.92 (m, 6H). <sup>13</sup>C NMR (100 MHz, CDCl<sub>3</sub>) δ 172.78, 172.47, 155.68, 79.75, 52.93, 52.31, 52.14, 41.16, 37.27, 33.16, 33.03, 32.62, 29.64, 28.29, 26.52, 26.22, 24.63, 22.83, 22.10. HRMS calculated for C<sub>22</sub>H<sub>40</sub>N<sub>2</sub>O<sub>5</sub> 413.30100 [M+H]<sup>+</sup>; found 413.30056.

Methia-Leu-HomoCha-OMe (**242**). Compound **241** (207 mg, 0.5 mmol) was deprotected using the general procedure B, followed by the peptide coupling with 2-methylthiazole-5-carboxylic acid using general procedure A. Purification by silica gel flash column chromatography (10% EtOAc/pentane → 50% EtOAc/pentane) yielded the title compound (210 mg, 0.48 mmol, 96%). <sup>1</sup>H NMR (400 MHz, CDCl<sub>3</sub>) δ 8.14 (s, 1H), 7.66 (d, J = 8.3 Hz, 1H), 7.35 (d, J = 8.3 Hz, 1H), 4.77-4.72 (m, 1H), 4.53-4.48 (m, 1H), 3.74 (s, 3H), 2.71 (s, 3H), 1.94-1.50 (m, 10H), 1.30-1.04 (m, 6H), 1.04-0.65 (m, 8H). <sup>13</sup>C NMR (100 MHz, CDCl<sub>3</sub>) δ 172.79, 172.41, 170.43, 160.69, 143.64, 133.85, 52.71, 52.24, 52.18, 41.05, 37.27, 33.10, 33.01, 32.81, 29.48, 26.52, 26.23, 24.81, 22.85, 22.10, 19.52. HRMS calculated for C<sub>22</sub>H<sub>35</sub>N<sub>3</sub>O<sub>4</sub>S 438.24210 [M+H]<sup>+</sup>; found 438.24181.

Methia-Leu-HomoCha-NHNH<sub>2</sub> (**243**). The title compound was prepared according to the general procedure C on a 0.48 mmol scale using starting material **106** in quantitative yield.

Boc-Leu-Cha(4-Me)-OMe (**244**). This compound was obtained using the same procedures as described above for the preparation of compound **203** on a 2.0 mmol scale using Boc-Cha(4-Me)-OH and Boc-Leu-OH as starting materials. Purification by silica gel flash column chromatography (5% EtOAc/pentane → 20% EtOAc/pentane) yielded the title compound (410 mg, 1.0 mmol, 50%). <sup>1</sup>H NMR (400 MHz, CDCl<sub>3</sub>) δ 7.16 (t, J = 8.6 Hz, 1H), 5.47 (d, J = 8.7 Hz, 1H), 4.64-4.55 (m, 1H), 4.26-4.16 (m, 1H), 3.72-3.71 (m, 3H), 1.88-1.52 (m, 7H), 1.44 (s, 13H), 1.27-1.20 (m, 2H), 1.00-0.79 (m, 11H). <sup>13</sup>C NMR (100 MHz, CDCl<sub>3</sub>) δ 173.12, 172.65, 155.62, 79.44, 77.36, 52.73, 51.91, 50.26, 41.03, 34.87, 34.70, 33.64, 33.19, 32.41, 32.26, 31.05, 30.43, 30.21, 29.99, 29.06, 28.16, 27.56, 24.46, 22.64, 22.43, 22.06, 20.12. HRMS calculated for C<sub>22</sub>H<sub>40</sub>N<sub>2</sub>O<sub>5</sub> 413.30100 [M+H]<sup>+</sup>; found 413.30065.

Methia-Leu-Cha(4-Me)-OMe (**245**). Compound **244** (206 mg, 0.5 mmol) was deprotected using the general procedure B, followed by peptide coupling with 2-methylthiazole-5-carboxylic acid using general procedure A. Purification by silica gel flash column chromatography (10% EtOAc/pentane → 50% EtOAc/pentane) yielded the title compound (160 mg, 0.37 mmol, 74%). <sup>1</sup>H NMR (400 MHz, CDCl<sub>3</sub>) δ 8.14-8.13 (m, 1H), 7.61-7.54 (m, 1H), 7.28-7.22 (m, 1H), 4.81-4.63 (m, 1H), 4.63-4.38 (m, 1H), 3.74-3.73 (m, 3H), 2.73-2.71 (m, 3H), 1.98-1.09 (m, 14H), 0.94-0.79 (m, 10H). <sup>13</sup>C NMR (100 MHz, CDCl<sub>3</sub>) δ 173.28, 173.25, 172.44, 172.30, 170.47, 170.45, 160.70, 143.67, 133.81, 133.80, 52.26, 52.17, 50.76, 50.50, 41.06, 40.95, 39.52, 36.39, 34.92, 34.80, 33.87, 33.23, 32.52, 32.48, 31.38, 30.57, 30.36, 30.07, 29.12, 27.71, 24.82, 22.87, 22.56, 22.15, 20.24, 19.56. HRMS calculated for C<sub>22</sub>H<sub>35</sub>N<sub>3</sub>O<sub>4</sub>S 438.24210 [M+H]<sup>+</sup>; found 438.24182.

Methia-Leu-Cha(4-Me)-NHNH<sub>2</sub> (**246**). The title compound was prepared according to the general procedure C on a 0.37 mmol scale using starting material **245** in quantitative yield.

Boc-Leu-Cha(4-OMe)-OMe (**247**). This compound was obtained using the same procedures as described above for the preparation of compound **203** on a 0.85 mmol scale using Boc-Cha(4-OMe)-OH and Boc-Leu-OH as starting materials. Purification by silica gel flash column chromatography (5% EtOAc/pentane → 20% EtOAc/pentane) yielded the title compound (284 mg, 0.66 mmol, 78%). <sup>1</sup>H

NMR (400 MHz, CDCl<sub>3</sub>) δ 6.97 (d, J = 8.3 Hz, 1H), 5.34 (d, J = 8.3 Hz, 1H), 4.64-4.59 (m, 1H), 4.21-4.17 (m, 1H), 3.72-3.71 (m, 3H), 3.40-3.37 (m, 1H), 3.33-3.28 (m, 3H), 1.89-1.24 (m, 23H), 0.95-0.92 (m, 6H). <sup>13</sup>C NMR (100 MHz, CDCl<sub>3</sub>) δ 173.10, 172.94, 172.51, 155.60, 79.55, 79.20, 75.05, 55.40, 55.32, 52.81, 52.02, 49.91, 41.04, 38.71, 33.31, 32.66, 31.41, 31.22, 31.11, 30.22, 28.76, 28.45, 28.19, 27.30, 26.10, 24.50, 22.71, 22.04. HRMS calculated for C<sub>22</sub>H<sub>40</sub>N<sub>2</sub>O<sub>6</sub> 429.29591 [M+H]<sup>+</sup>; found 429.29568.

Methia-Leu-Cha(4-OMe)-OMe (**248**). Compound **247** (142 mg, 0.33 mmol) was deprotected using the general procedure B, followed by peptide coupling with 2-methylthiazole-5-carboxylic acid using general procedure A. Purification by silica gel flash column chromatography (10% EtOAc/pentane → 50% EtOAc/pentane) yielded the title compound (108 mg, 0.24 mmol, 73%). <sup>1</sup>H NMR (400 MHz, CDCl<sub>3</sub>) δ 8.13 (s, 1H), 7.61-7.57 (m, 1H), 7.27 (d, J = 8.0 Hz, 1H), 4.74-4.69 (m, 1H), 4.64-4.46 (m, 1H), 3.73 (s, 3H), 3.37-3.15 (m, 4H), 2.72 (s, 3H), 1.83-1.03 (m, 14H), 0.94-0.88 (m, 6H). <sup>13</sup>C NMR (100 MHz, CDCl<sub>3</sub>) δ 173.20, 173.01, 172.41, 172.35, 170.59, 170.51, 160.74, 160.69, 143.56, 133.83, 133.77, 79.27, 75.17, 55.53, 55.48, 52.27, 52.16, 50.61, 50.39, 40.99, 40.91, 38.86, 38.52, 33.51, 32.84, 31.44, 31.29, 31.04, 30.51, 29.68, 28.79, 28.54, 27.36, 26.22, 24.80, 22.85, 22.10, 19.53. HRMS calculated for C<sub>22</sub>H<sub>35</sub>N<sub>3</sub>O<sub>5</sub>S 454.23702 [M+H]<sup>+</sup>; found 454.23684.

Methia-Leu-Cha(4-OMe)-NHNH<sub>2</sub> (**249**). The title compound was prepared according to the general procedure C on a 0.24 mmol scale using starting material **248** in quantitative yield.

Boc-Leu-1-DecAla-OMe (**250**). This compound was obtained using the same procedures as described above for the preparation of compound **203** on a 0.8 mmol scale using Boc-1-DecAla-OH and Boc-Leu-OH as starting materials. Purification by silica gel flash column chromatography (5% EtOAc/pentane → 20% EtOAc/pentane) yielded the title compound (236 mg, 0.52 mmol, 65%). <sup>1</sup>H NMR (400 MHz, CDCl<sub>3</sub>) δ 6.92-6.51 (m, 1H), 5.14-5.11 (m, 1H), 4.69-4.47 (m, 1H), 4.16 (s, 1H), 3.78-3.63 (m, 3H), 1.82-0.78 (m, 36H). <sup>13</sup>C NMR (100 MHz, CDCl<sub>3</sub>) δ 173.58, 173.34, 172.51, 155.66, 79.81, 52.92, 52.17, 52.16, 52.10, 50.26, 49.88, 47.60, 42.97, 41.32, 41.22, 40.71, 34.44, 34.23, 34.15, 33.15, 32.54, 32.51,

30.18, 30.07, 28.29, 27.44, 26.78, 26.74, 26.68, 26.61, 26.48, 26.37, 26.24, 25.96, 25.81, 25.36, 24.63, 21.25, 19.95, 19.61. HRMS calculated for C<sub>25</sub>H<sub>44</sub>N<sub>2</sub>O<sub>5</sub> 453.33230 [M+H]<sup>+</sup>; found 453.33179.

Methia-Leu-1-DecAla-OMe (**251**). Compound **250** (122 mg, 0.27 mmol) was deprotected using the general procedure B, followed by peptide coupling with 2-methylthiazole-5-carboxylic acid using general procedure A. Purification by silica gel flash column chromatography (5% EtOAc/pentane → 20% EtOAc/pentane) yielded the title compound (109 mg, 0.23 mmol, 85%). <sup>1</sup>H NMR (400 MHz, CDCl<sub>3</sub>) δ 8.14-8.13 (m, 1H), 7.46-7.32 (m, 1H), 7.19-6.95 (m, 1H), 4.78-4.42 (m, 2H), 3.81-3.59 (m, 3H), 2.72 (s, 3H), 2.03- 0.47 (m, 28H). <sup>13</sup>C NMR (100 MHz, CDCl<sub>3</sub>) δ 173.54, 173.33, 173.28, 173.01, 172.23, 172.19, 172.08, 171.94, 170.61, 160.68, 160.64, 133.78, 52.30, 52.10, 50.63, 50.18, 47.55, 42.92, 41.16, 41.03, 40.73, 40.70, 39.41, 38.86, 38.68, 37.86, 37.69, 37.46, 37.24, 36.83, 35.62, 34.43, 34.21, 32.55, 31.89, 29.98, 26.77, 26.51, 26.33, 26.25, 25.95, 25.79, 25.34, 24.83, 22.87, 22.20, 21.26, 19.98, 19.67, 19.57. HRMS calculated for C<sub>25</sub>H<sub>39</sub>N<sub>3</sub>O<sub>4</sub>S 478.27340 [M+H]<sup>+</sup>; found 478.27332.

Methia-Leu-1-DecAla-NHNH<sub>2</sub> (**252**). The title compound was prepared according to the general procedure C on a 0.2 mmol scale using starting material **251** in quantitative yield.

Boc-Leu-2-DecAla-OMe (**253**). This compound was obtained using the same procedures as described above for the preparation of compound **203** on a 0.70 mmol scale using Boc-2-DecAla-OH and Boc-Leu-OH as starting materials. Purification by silica gel flash column chromatography (5% EtOAc/pentane → 20% EtOAc/pentane) yielded the title compound (211 mg, 0.47 mmol, 67%). <sup>1</sup>H NMR (400 MHz, CDCl<sub>3</sub>) δ 6.86-6.78 (m, 1H), 5.28-5.06 (m, 1H), 4.66-4.60 (m, 1H), 4.20-4.15 (m, 1H), 3.71 (s, 3H), 1.87-1.08 (m, 30H), 0.95-0.88 (m, 7H). <sup>13</sup>C NMR (100 MHz, CDCl<sub>3</sub>) δ 173.29, 172.48, 155.68, 79.75, 52.88, 52.11, 50.01, 41.17, 40.08, 35.80, 35.62, 34.70, 32.72, 32.26, 32.11, 31.98, 31.78, 28.27, 27.80, 26.95, 26.83, 26.59, 26.51, 25.67, 25.64, 24.60, 22.80, 22.15, 20.85. HRMS calculated for C<sub>25</sub>H<sub>44</sub>N<sub>2</sub>O<sub>5</sub> 453.33230 [M+H]<sup>+</sup>; found 453.33201.

Methia-Leu-2-DecAla-OMe (**254**). Compound **253** (211 mg, 0.47 mmol) was deprotected using the general procedure B, followed by peptide coupling with 2-methylthiazole-5-carboxylic acid using general procedure A. Purification by silica gel flash column chromatography (10% EtOAc/pentane → 50% EtOAc/pentane) yielded the title compound (219 mg, 0.46 mmol, 98%). <sup>1</sup>H NMR (400 MHz, CDCl<sub>3</sub>) δ 8.17 (d, J = 1.9 Hz, 1H), 7.79-7.68 (m, 1H), 7.42-7.34 (m, 1H), 4.78-4.70 (m, 1H), 4.63-4.56 (m, 1H), 3.74-3.70 (m, 3H), 2.71 (s, 3H), 1.87-0.53 (m, 28H). <sup>13</sup>C NMR (100 MHz, CDCl<sub>3</sub>) δ 173.21, 172.45, 170.48, 160.66, 143.59, 133.85, 52.17, 50.43, 50.39, 40.89, 40.86, 40.75, 39.72, 39.69, 35.93, 35.57, 34.14, 32.57, 32.23, 32.04, 31.94, 31.88, 27.64, 26.93, 26.58, 25.62, 22.82, 22.09, 20.84, 19.47. HRMS calculated for C<sub>25</sub>H<sub>39</sub>N<sub>3</sub>O<sub>4</sub>S 478.27340 [M+H]<sup>+</sup>; found 478.27323.

Methia-Leu-2-DecAla-Phe(4-CH<sub>2</sub>NH<sub>2</sub>)-VS (**255**). The title compound was prepared according to the general PROCEDUREC on a 0.46 mmol scale using starting material **118** IN quantitative yield.

Boc-Leu-BiCha-OMe (**256**). This compound was obtained using the same procedures as described above for the preparation of compound **203** on a 0.8 mmol scale using Boc-BiCha-OH and Boc-Leu-OH as starting materials. Purification by silica gel flash column chromatography (5% EtOAc/pentane → 20% EtOAc/pentane) yielded the title compound (300 mg, 0.62 mmol, 75%). <sup>1</sup>H NMR (400 MHz, CDCl<sub>3</sub>) δ 6.73-6.68 (m, 1H), 5.09 (d, J = 8.1 Hz, 1H), 4.64-4.55 (m, 1H), 4.22-4.04 (m, 1H), 3.72-3.71 (m, 3H), 1.94-0.66 (m, 41H). <sup>13</sup>C NMR (100 MHz, CDCl<sub>3</sub>) δ 173.31, 172.46, 155.74, 79.91, 52.96, 52.23, 50.51, 50.16, 43.29, 41.70, 41.07, 40.40, 36.04, 34.35, 33.71, 32.76, 30.54, 30.25, 30.07, 29.73, 29.59, 28.51, 28.33, 26.86, 26.76, 25.51, 25.28, 24.69, 22.87, 22.20. HRMS calculated for C<sub>27</sub>H<sub>48</sub>N<sub>2</sub>O<sub>5</sub> 481.36360 [M+H]<sup>+</sup>; found 481.36346.

Methia-Leu-BiCha-OMe (**257**). Compound **256** (154 mg, 0.32 mmol) was deprotected using the general procedure B, followed by peptide coupling with 2-methylthiazole-5-carboxylic acid using general procedure A. Purification by silica gel flash column chromatography (10% EtOAc/pentane → 50% EtOAc/pentane) yielded the title compound (140 mg, 0.28 mmol, 88%). <sup>1</sup>H NMR (400 MHz, CDCl<sub>3</sub>) δ 8.12-8.11 (m, 1H), 7.48-7.41 (m, 1H), 7.18-7.10 (m, 1H), 4.75-4.70 (m, 1H), 4.61-4.52 (m, 1H), 3.74-



3.73 (m, 3H), 2.71 (s, 3H), 1.97-0.65 (m, 32H).  $^{13}\text{C}$  NMR (100 MHz,  $\text{CDCl}_3$ )  $\delta$  173.29, 173.26, 172.38, 172.19, 170.46, 160.70, 160.68, 143.66, 133.78, 133.74, 52.32, 52.16, 50.86, 50.50, 43.24, 41.62, 41.13, 40.90, 40.32, 39.58, 35.72, 34.38, 33.59, 32.76, 30.95, 30.54, 30.24, 29.97, 29.66, 29.54, 28.42, 26.88, 26.76, 25.50, 25.27, 24.84, 22.90, 22.19, 19.61. HRMS calculated for  $\text{C}_{27}\text{H}_{43}\text{N}_3\text{O}_4\text{S}$  506.30470  $[\text{M}+\text{H}]^+$ ; found 506.30462.

Methia-Leu-BiCha-NHNH<sub>2</sub> (**258**) The title compound was prepared according to the general procedure C on a 0.28 mmol scale using starting material **257** in quantitative yield.

Boc-Cha-Cha-OMe (**259**). This compound was obtained using the same procedures as described above for the preparation of compound **203** on a 1.5 mmol scale using Boc-Cha-OH as starting material. Purification by silica gel flash column chromatography (5% EtOAc/pentane  $\rightarrow$  20% EtOAc/pentane) yielded the title compound (438 mg, 1.0 mmol, 67%).  $^1\text{H}$  NMR (400 MHz,  $\text{CDCl}_3$ )  $\delta$  6.96 (d,  $J = 7.9$  Hz, 1H), 5.30 (d,  $J = 8.4$  Hz, 1H), 4.64-4.58 (m, 1H), 4.25-4.19 (m, 1H), 3.72 (s, 3H), 1.86-0.75 (m, 35H).  $^{13}\text{C}$  NMR (100 MHz,  $\text{CDCl}_3$ )  $\delta$  173.15, 172.52, 155.60, 79.56, 77.36, 60.26, 52.17, 51.99, 49.91, 39.79, 33.84, 33.40, 33.31, 32.73, 32.33, 28.21, 26.33, 26.26, 26.11, 26.00, 25.84. HRMS calculated for  $\text{C}_{24}\text{H}_{42}\text{N}_2\text{O}_5$  439.31665  $[\text{M}+\text{H}]^+$ ; found 439.31656.

Methia-Cha-Cha-OMe (**260**). Compound **259** (438 mg, 1.0 mmol) was deprotected using the general procedure B, followed by the peptide coupling with 2-methylthiazole-5-carboxylic acid using general procedure A. Purification by silica gel flash column chromatography (10% EtOAc/pentane  $\rightarrow$  50% EtOAc/pentane) yielded the title compound (439 mg, 0.95 mmol, 95%).  $^1\text{H}$  NMR (400 MHz,  $\text{CDCl}_3$ )  $\delta$  8.20 (s, 1H), 8.04 (d,  $J = 8.1$  Hz, 1H), 7.64 (d,  $J = 7.5$  Hz, 1H), 4.83-4.77 (m, 1H), 4.59-4.54 (m, 1H), 3.73 (s, 3H), 2.71 (s, 3H), 1.73-1.08 (m, 22H), 0.92-0.76 (m, 4H).  $^{13}\text{C}$  NMR (100 MHz,  $\text{CDCl}_3$ )  $\delta$  173.01, 172.65, 170.12, 160.58, 143.74, 133.81, 77.36, 51.95, 51.55, 50.27, 39.24, 33.90, 33.84, 33.27, 33.00, 32.58, 32.40, 26.26, 26.21, 26.00, 25.90, 25.87, 25.76, 19.37. HRMS calculated for  $\text{C}_{24}\text{H}_{37}\text{N}_3\text{O}_4\text{S}$  464.25775  $[\text{M}+\text{H}]^+$ ; found 464.25755.

Methia-Cha-Cha-NHNH<sub>2</sub> (**261**). The title compound was prepared according to the general procedure C on a 0.95 mmol scale using starting material **260** in quantitative yield.

Benz-Leu-Leu-Phe(4-aminomethyl)-VS TFA salt (**6**). This compound was prepared according to the general procedure D on a 50  $\mu$ mol scale, followed by the removal of the Boc protecting group using the general procedure B. Purification by HPLC (30%-40% MeCN-H<sub>2</sub>O) yielded the title compound (7.3 mg, 10.4  $\mu$ mol, 21%). <sup>1</sup>H NMR (600 MHz, MeOD)  $\delta$  7.93-7.82 (m, 2H), 7.62-7.54 (m, 1H), 7.52-7.49 (m, 2H), 7.38 (d, J = 8.1 Hz, 2H), 7.35-7.27 (m, 2H), 6.86-6.82 (m, 1H), 6.64-6.61 (m, 1H), 4.59-4.57 (m, 1H), 4.38-4.34 (m, 1H), 4.09 (s, 2H), 3.09-2.91 (m, 5H), 1.83-1.47 (m, 6H), 1.09-0.85 (m, 12H). <sup>13</sup>C NMR (150 MHz, MeOD)  $\delta$  175.17, 174.28, 170.80, 146.61, 139.63, 135.10, 133.05, 132.92, 131.88, 131.23, 130.18, 129.62, 128.63, 54.60, 54.56, 53.59, 53.55, 53.50, 53.46, 52.47, 52.38, 44.07, 42.77, 41.64, 41.60, 41.36, 40.31, 40.28, 26.19, 25.96, 23.46, 23.38, 22.06, 21.76. LC-MS (linear gradient 10  $\rightarrow$  90% MeCN/H<sub>2</sub>O, 0.1% TFA, 15.0 min): Rt (min): 6.12 (ESI-MS (m/z): 585.13, (M+H<sup>+</sup>)). HRMS calculated for C<sub>31</sub>H<sub>44</sub>N<sub>4</sub>O<sub>5</sub>S 585.31052 [M+H]<sup>+</sup>; found 585.31048.

Pyra-Leu-Leu-Phe(4-aminomethyl)-VS TFA salt (**7**). This compound was prepared according to the general procedure D on a 50  $\mu$ mol scale, followed by the removal of the Boc protecting group using the general procedure B. Purification by HPLC (30%-35% MeCN-H<sub>2</sub>O) yielded the title compound (3.5 mg, 5.0  $\mu$ mol, 10%). <sup>1</sup>H NMR (600 MHz, MeOD)  $\delta$  9.26 (d, J = 1.5 Hz, 1H), 8.84 (d, J = 2.5 Hz, 1H), 8.75-8.74 (m, 1H), 7.43-7.37 (m, 2H), 7.37-7.30 (m, 2H), 6.86-6.82 (m, 1H), 6.67-6.56 (m, 1H), 4.66-4.59 (m, 1H), 4.39-4.35 (m, 1H), 4.12 (s, 2H), 3.08-2.98 (m, 2H), 2.97 (s, 3H), 1.86-1.46 (m, 6H), 1.05-0.85 (m, 12H). <sup>13</sup>C NMR (150 MHz, MeOD)  $\delta$  174.59, 174.26, 165.66, 148.85, 146.57, 145.85, 144.86, 139.60, 132.96, 131.89, 131.26, 130.22, 54.04, 53.49, 52.39, 44.09, 42.76, 41.93, 41.54, 40.30, 26.16, 25.95, 23.40, 22.01, 21.74. LC-MS (linear gradient 10  $\rightarrow$  90% MeCN/H<sub>2</sub>O, 0.1% TFA, 15.0 min): Rt (min): 5.48 (ESI-MS (m/z): 587.20, (M+H<sup>+</sup>)). HRMS calculated for C<sub>29</sub>H<sub>42</sub>N<sub>6</sub>O<sub>5</sub>S 587.30102 [M+H]<sup>+</sup>; found 587.30099.

Phnico-Leu-Leu-Phe(4-aminomethyl)-VS TFA salt (**8**). This compound was prepared according to the general procedure D on a 50  $\mu\text{mol}$  scale, followed by the removal of the Boc protecting group using the general procedure B. Purification by HPLC (30%-45% MeCN-H<sub>2</sub>O) yielded the title compound (3.3 mg, 4.3  $\mu\text{mol}$ , 9%). <sup>1</sup>H NMR (600 MHz, MeOD)  $\delta$  9.13-9.09 (m, 1H), 8.37-8.34 (m, 1H), 8.09-8.04 (m, 2H), 8.03-8.01 (m, 1H), 7.60-7.46 (m, 3H), 7.43-7.27 (m, 4H), 6.85-6.82 (m, 1H), 6.64-6.61 (m, 1H), 4.62-4.58 (m, 1H), 4.40-4.36 (m, 1H), 4.10 (s, 2H), 3.08-2.90 (m, 5H), 1.90-1.49 (m, 6H), 1.08-0.87 (m, 12H). <sup>13</sup>C NMR (150 MHz, MeOD)  $\delta$  175.02, 174.32, 168.52, 161.32, 149.75, 146.56, 139.62, 139.32, 138.00, 132.95, 131.92, 131.26, 131.10, 130.21, 130.03, 129.44, 128.39, 121.71, 54.66, 53.56, 52.51, 52.42, 44.08, 42.77, 41.53, 41.38, 40.32, 26.18, 26.00, 23.47, 23.38, 22.07, 21.75. LC-MS (linear gradient 10  $\rightarrow$  90% MeCN/H<sub>2</sub>O, 0.1% TFA, 15.0 min): Rt (min): 6.31 (ESI-MS (m/z): 662.20, (M+H<sup>+</sup>)). HRMS calculated for C<sub>36</sub>H<sub>47</sub>N<sub>5</sub>O<sub>5</sub>S 662.33707 [M+H]<sup>+</sup>; found 662.33712.

Dibenz-Leu-Leu-Phe(4-aminomethyl)-VS TFA salt (**9**). This compound was prepared according to the general procedure D on a 50  $\mu\text{mol}$  scale, followed by the removal of the Boc protecting group using the general procedure B. Purification by HPLC (30%-40% MeCN-H<sub>2</sub>O) yielded the title compound (4.3 mg, 5.6  $\mu\text{mol}$ , 11%). <sup>1</sup>H NMR (600 MHz, MeOD)  $\delta$  7.55-7.43 (m, 3H), 7.42-7.26 (m, 4H), 6.86-6.81 (m, 1H), 6.63-6.60 (m, 1H), 4.57-4.53 (m, 1H), 4.41-4.39 (m, 1H), 4.13-4.06 (m, 2H), 3.11-2.88 (m, 5H), 1.84-1.46 (m, 6H), 1.05-0.90 (m, 12H). <sup>13</sup>C NMR (150 MHz, MeOD)  $\delta$  174.30, 174.11, 168.71, 146.68, 146.56, 139.62, 138.58, 134.07, 132.91, 132.88, 132.51, 132.30, 131.86, 131.24, 130.45, 130.17, 129.94, 128.79, 127.04, 54.67, 54.30, 53.30, 52.38, 44.07, 42.77, 42.17, 41.34, 40.27, 26.02, 25.92, 23.48, 23.43, 21.93, 21.82. LC-MS (linear gradient 10  $\rightarrow$  90% MeCN/H<sub>2</sub>O, 0.1% TFA, 15.0 min): Rt (min): 6.58 (ESI-MS (m/z): 653.13, (M+H<sup>+</sup>)). HRMS calculated for C<sub>31</sub>H<sub>42</sub>Cl<sub>2</sub>N<sub>4</sub>O<sub>5</sub>S 653.23257 [M+H]<sup>+</sup>; found 653.23287.

Morph-Leu-Leu-Phe(4-aminomethyl)-VS TFA salt (**10**). This compound was prepared according to the general procedure D on a 50  $\mu\text{mol}$  scale, followed by the removal of the Boc protecting group using the general procedure B. Purification by HPLC (25%-35% MeCN-H<sub>2</sub>O) yielded the title compound (5.0 mg, 6.9  $\mu\text{mol}$ , 14%). <sup>1</sup>H NMR (600 MHz, MeOD)  $\delta$  7.45-7.38 (m, 2H), 7.37-7.31 (m, 2H), 6.83-6.77

(m, 1H), 6.58-6.51 (m, 1H), 4.82-4.79 (m, 1H), 4.45-4.41 (m, 1H), 4.39-4.32 (m, 1H), 4.11 (s, 2H), 4.03-3.86 (m, 6H), 3.11-2.91 (m, 5H), 1.76-1.41 (m, 6H), 1.10-0.83 (m, 12H). <sup>13</sup>C NMR (150 MHz, MeOD) δ 174.47, 174.31, 146.47, 139.59, 133.04, 131.93, 131.29, 130.25, 65.01, 58.61, 54.03, 53.63, 53.46, 52.60, 44.05, 42.75, 41.96, 41.85, 40.23, 25.96, 25.87, 23.45, 23.38, 21.89, 21.82. LC-MS (linear gradient 10 → 90% MeCN/H<sub>2</sub>O, 0.1% TFA, 15.0 min): Rt (min): 4.28 (ESI-MS (m/z): 608.27, (M+H<sup>+</sup>)). HRMS calculated for C<sub>30</sub>H<sub>49</sub>N<sub>5</sub>O<sub>6</sub>S 608.34763 [M+H]<sup>+</sup>; found 608.34759.

Methia-Leu-Leu-Phe(4-aminomethyl)-VS TFA salt (**11**). This compound was prepared according to the general procedure D on a 70 μmol scale, followed by the removal of the Boc protecting group using the general procedure B. Purification by HPLC (25%-40% MeCN-H<sub>2</sub>O) yielded the title compound (8.8 mg, 12.2 μmol, 17%). <sup>1</sup>H NMR (600 MHz, MeOD) δ 8.27 (s, 1H), 7.40 (d, J = 8.1 Hz, 2H), 7.34 (d, J = 8.1 Hz, 2H), 6.83-6.80 (m, 1H), 6.62-6.59 (m, 1H), 4.52-4.50 (m, 1H), 4.35-4.32 (m, 1H), 4.11 (s, 2H), 3.02-3.01 (m, 2H), 2.96 (s, 3H), 2.75 (s, 3H), 1.83-1.47 (m, 6H), 1.07-0.86 (m, 12H). <sup>13</sup>C NMR (150 MHz, MeOD) δ 174.90, 174.28, 173.09, 163.19, 146.52, 144.56, 139.63, 135.33, 132.96, 131.90, 131.27, 130.21, 54.50, 53.59, 52.43, 44.07, 42.77, 41.42, 41.26, 40.33, 26.10, 25.97, 23.44, 23.34, 22.02, 21.71, 19.13. LC-MS (linear gradient 10 → 90% MeCN/H<sub>2</sub>O, 0.1% TFA, 15.0 min): Rt (min): 5.51 (ESI-MS (m/z): 606.13, (M+H<sup>+</sup>)). HRMS calculated for C<sub>29</sub>H<sub>43</sub>N<sub>5</sub>O<sub>5</sub>S<sub>2</sub> 606.27784 [M+H]<sup>+</sup>; found 606.27799.

N3Acetyl-Phe-Leu-Leu-Phe(4-aminomethyl)-VS TFA salt (**12**). This compound was prepared according to the general procedure D on a 50 μmol scale, followed by the removal of the Boc protecting group using the general procedure B. Purification by HPLC (30%-40% MeCN-H<sub>2</sub>O) yielded the title compound (7.3 mg, 10.4 μmol, 21%). <sup>1</sup>H NMR (600 MHz, MeOD) δ 7.43-7.35 (m, 4H), 7.33-7.22 (m, 5H), 6.85-6.82 (m, 1H), 6.66-6.63 (m, 1H), 4.60-4.57 (m, 1H), 4.31-4.29 (m, 2H), 4.09 (s, 2H), 3.91 (d, J = 2.6 Hz, 2H), 3.19-3.15 (m, 1H), 3.08-2.96 (m, 3H), 2.95 (s, 3H), 1.71-1.46 (m, 6H), 1.00-0.86 (m, 12H). <sup>13</sup>C NMR (150 MHz, MeOD) δ 174.85, 174.32, 174.01, 170.95, 146.44, 139.72, 137.86, 132.92, 131.81, 131.35, 130.30, 130.19, 129.63, 128.04, 57.07, 54.14, 53.81, 52.72, 52.43, 44.07, 42.77, 41.45, 41.10, 40.40, 38.30, 26.00, 25.82, 23.50, 23.39, 21.78, 21.76. LC-MS (linear gradient 10 → 90%

MeCN/H<sub>2</sub>O, 0.1% TFA, 15.0 min): Rt (min): 6.44 (ESI-MS (m/z): 711.27, (M+H<sup>+</sup>)). HRMS calculated for C<sub>35</sub>H<sub>50</sub>N<sub>8</sub>O<sub>6</sub>S 711.36468 [M+H]<sup>+</sup>; found 711.36500.

N3Phe-Leu-Ser-Phe(4-CH<sub>2</sub>NH<sub>2</sub>)-VS TFA salt (**13**). This compound was prepared according to the general procedure D on a 50 μmol scale, followed by the removal of the Boc protecting group using the general procedure B. Purification by HPLC (30%-40% MeCN-H<sub>2</sub>O) yielded the title compound (2.8 mg, 3.8 μmol, 8%). <sup>1</sup>H NMR (600 MHz, MeOD) δ 7.46-7.23 (m, 9H), 6.85-6.81 (m, 1H), 6.76-6.73 (m, 1H), 4.39-4.27 (m, 2H), 4.20-4.17 (m, 1H), 4.11 (s, 2H), 3.84-3.81 (m, 1H), 3.76-3.73 (m, 1H), 3.25-3.22 (m, 1H), 3.07-2.98 (m, 3H), 2.95 (s, 3H), 1.69-1.52 (m, 3H), 1.02-0.88 (m, 6H). <sup>13</sup>C NMR (150 MHz, MeOD) δ 174.33, 172.23, 171.81, 146.65, 139.69, 137.84, 133.00, 131.84, 131.26, 130.42, 130.24, 129.65, 128.10, 65.38, 62.75, 56.70, 53.80, 52.56, 44.09, 42.77, 41.38, 40.25, 38.72, 25.82, 23.46, 21.84. LC-MS (linear gradient 10 → 90% MeCN/H<sub>2</sub>O, 0.1% TFA, 15.0 min): Rt (min): 6.27 (ESI-MS (m/z): 628.20, (M+H<sup>+</sup>)). HRMS calculated for C<sub>30</sub>H<sub>41</sub>N<sub>7</sub>O<sub>6</sub>S 628.29118 [M+H]<sup>+</sup>; found 628.29123.

N3Phe-Leu-Leu(4-F)-Phe(4-CH<sub>2</sub>NH<sub>2</sub>)-VS TFA salt (**14**). This compound was prepared according to the general procedure D on a 100 μmol scale, followed by the removal of the Boc protecting group using the general procedure B. Purification by HPLC (40%-45% MeCN-H<sub>2</sub>O) yielded the title compound (22.1 mg, 28.1 μmol, 28%). <sup>1</sup>H NMR (400 MHz, MeOD) δ 7.45-7.23 (m, 10H), 6.84-6.79 (m, 1H), 6.65-6.61 (m, 1H), 4.90-4.77 (m, 1H), 4.55-4.50 (m, 1H), 4.36-4.32 (m, 1H), 4.22-4.19 (m, 1H), 4.12 (s, 2H), 3.26-3.21 (m, 1H), 3.06-2.96 (m, 3H), 2.95 (s, 3H), 2.24-1.88 (m, 2H), 1.64-1.55 (m, 3H), 1.44-1.33 (m, 6H), 0.99-0.92 (m, 6H). <sup>13</sup>C NMR (100 MHz, MeOD) δ 174.03, 173.42, 172.16, 146.45, 146.43, 139.58, 137.81, 133.01, 131.87, 131.25, 130.42, 130.26, 129.66, 129.27, 128.62, 128.11, 96.77, 95.12, 65.48, 53.85, 53.82, 52.58, 52.49, 51.87, 44.05, 43.02, 42.81, 42.76, 41.13, 40.24, 38.65, 27.48, 27.24, 27.14, 26.90, 25.76, 23.42, 21.87. LC-MS (linear gradient 10 → 90% MeCN/H<sub>2</sub>O, 0.1% TFA, 15.0 min): Rt (min): 6.95 (ESI-MS (m/z): 672.20, (M+H<sup>+</sup>)). HRMS calculated for C<sub>33</sub>H<sub>46</sub>FN<sub>7</sub>O<sub>5</sub>S 672.33379 [M+H]<sup>+</sup>; found 672.33384.

N<sub>3</sub>Phe-Leu-Ser(Me)-Phe(4-CH<sub>2</sub>NH<sub>2</sub>)-VS TFA salt (**15**). This compound was prepared according to the general procedure D on a 50 μmol scale, followed by the removal of the Boc protecting group using the general procedure B. Purification by HPLC (40%-45% MeCN-H<sub>2</sub>O) yielded the title compound (10.6 mg, 14.0 μmol, 28%). <sup>1</sup>H NMR (400 MHz, MeOD) δ 8.31 (t, J = 8.4 Hz, 2H), 7.99 (d, J = 8.0 Hz, 1H), 7.46-7.21 (m, 9H), 6.86-6.81 (m, 1H), 6.71-6.67 (m, 1H), 4.47-4.31 (m, 2H), 4.20-4.16 (m, 1H), 4.11 (s, 2H), 3.69-3.65 (m, 1H), 3.59-3.55 (m, 1H), 3.38 (s, 3H), 3.25-3.20 (m, 1H), 3.10-2.98 (m, 3H), 2.96 (s, 3H), 1.68-1.45 (m, 3H), 0.98-0.89 (m, 6H). <sup>13</sup>C NMR (100 MHz, MeOD) δ 174.40, 172.24, 172.16, 171.64, 146.83, 139.70, 137.82, 132.99, 131.80, 131.20, 130.41, 130.23, 129.65, 128.10, 72.76, 65.40, 65.36, 59.42, 54.90, 54.80, 53.78, 53.68, 52.67, 52.58, 44.06, 42.86, 41.35, 40.08, 38.73, 25.80, 23.46, 21.85. LC-MS (linear gradient 10 → 90% MeCN/H<sub>2</sub>O, 0.1% TFA, 12.5 min): Rt (min): 5.82 (ESI-MS (m/z): 642.27, (M+H<sup>+</sup>)). HRMS calculated for C<sub>31</sub>H<sub>43</sub>N<sub>7</sub>O<sub>6</sub>S 642.30683[M+H]<sup>+</sup>; found 642.30685.

N<sub>3</sub>Phe-Leu-Thr-Phe(4-CH<sub>2</sub>NH<sub>2</sub>)-VS TFA salt (**16**). This compound was prepared according to the general procedure D on a 50 μmol scale, followed by the removal of the Boc protecting group using the general procedure B. Purification by HPLC (30%-40% MeCN-H<sub>2</sub>O) yielded the title compound (6.9 mg, 9.1 μmol, 18%). <sup>1</sup>H NMR (600 MHz, MeOD) δ 7.43-7.24 (m, 11H), 6.87-6.83 (m, 1H), 6.73-6.70 (m, 1H), 4.94-4.91 (m, 1H), 4.43-4.36 (m, 1H), 4.25 (d, J = 3.6 Hz, 1H), 4.24-4.16 (m, 2H), 4.11 (s, 3H), 3.26-3.23 (m, 1H), 3.10-2.96 (m, 4H), 2.96 (s, 3H), 1.69-1.56 (m, 3H), 1.17 (d, J = 6.4 Hz, 3H), 0.98-0.88 (m, 6H). <sup>13</sup>C NMR (150 MHz, MeOD) δ 174.57, 172.36, 171.64, 146.70, 139.65, 137.87, 132.99, 131.85, 131.25, 130.40, 130.22, 129.65, 128.10, 68.34, 65.40, 59.84, 54.05, 52.48, 44.09, 42.78, 41.31, 40.28, 38.76, 25.86, 23.44, 21.82, 20.24. LC-MS (linear gradient 10 → 90% MeCN/H<sub>2</sub>O, 0.1% TFA, 15.0 min): Rt (min): 6.43 (ESI-MS (m/z): 642.27, (M+H<sup>+</sup>)). HRMS calculated for C<sub>31</sub>H<sub>43</sub>N<sub>7</sub>O<sub>6</sub>S 642.30683 [M+H]<sup>+</sup>; found 642.30687.

N<sub>3</sub>Phe-Leu-Ala(CF<sub>3</sub>)-Phe(4-CH<sub>2</sub>NH<sub>2</sub>)-VS TFA salt (**17**). This compound was prepared according to the general procedure D on a 91 μmol scale, followed by the removal of the Boc protecting group using the general procedure B. Purification by HPLC (40%-45% MeCN-H<sub>2</sub>O) yielded the title compound (24.3 mg, 30.6 μmol, 34%). <sup>1</sup>H NMR (400 MHz, MeOD) δ 7.46-7.22 (m, 10H), 6.98-6.94 (m, 1H), 6.86-6.76

(m, 1H), 6.66-6.58 (m, 1H), 4.69-4.54 (m, 1H), 4.32-4.03 (m, 4H), 3.27-3.17 (m, 1H), 3.14-2.61 (m, 8H), 1.72-1.48 (m, 3H), 1.01-0.89 (td,  $J = 14.5, 5.9$  Hz, 6H).  $^{13}\text{C}$  NMR (100 MHz, MeOD)  $\delta$  174.78, 174.41, 172.71, 172.30, 170.85, 146.62, 146.12, 139.73, 139.48, 137.82, 133.05, 132.99, 131.99, 131.88, 131.37, 131.28, 130.40, 130.33, 130.28, 130.17, 129.64, 128.09, 65.34, 64.73, 54.91, 54.02, 53.16, 53.07, 52.88, 44.04, 42.84, 42.74, 41.13, 40.98, 40.37, 38.72, 38.66, 35.32, 35.03, 35.00, 25.73, 25.54, 23.37, 22.91, 22.54, 21.88. LC-MS (linear gradient 10  $\rightarrow$  90% MeCN/H<sub>2</sub>O, 0.1% TFA, 15.0 min): Rt (min): 7.07 (ESI-MS (m/z): 680.13, (M+H<sup>+</sup>)). HRMS calculated for C<sub>31</sub>H<sub>40</sub>F<sub>3</sub>N<sub>7</sub>O<sub>5</sub>S 680.28365 [M+H]<sup>+</sup>; found 680.28362.

N<sub>3</sub>Phe-Leu-Gly-Phe(4-CH<sub>2</sub>NH<sub>2</sub>)-VS TFA salt (**18**). This compound was prepared according to the general procedure D on a 50  $\mu\text{mol}$  scale, followed by the removal of the Boc protecting group using the general procedure B. Purification by HPLC (40%-50% MeCN-H<sub>2</sub>O) yielded the title compound (9.6 mg, 16.0  $\mu\text{mol}$ , 32%).  $^1\text{H}$  NMR (400 MHz, MeOD)  $\delta$  7.56-7.13 (m, 9H), 6.88 (dd,  $J = 15.2, 4.9$  Hz, 1H), 6.73 (dd,  $J = 15.2, 1.5$  Hz, 1H), 4.25 (dd,  $J = 9.0, 5.7$  Hz, 1H), 4.12 (dd,  $J = 8.9, 4.8$  Hz, 1H), 4.07 (s, 2H), 3.97 (d,  $J = 16.9$  Hz, 1H), 3.63 (d,  $J = 16.9$  Hz, 1H), 3.22 (dd,  $J = 14.1, 4.8$  Hz, 1H), 3.09-2.93 (m, 6H), 1.66-1.56 (m, 3H), 1.00-0.81 (m, 6H).  $^{13}\text{C}$  NMR (101 MHz, MeOD)  $\delta$  175.01, 172.43, 171.13, 162.70, 162.34, 146.69, 139.76, 137.82, 132.98, 131.78, 131.31, 130.39, 130.23, 129.65, 128.10, 65.01, 54.30, 52.61, 44.04, 43.52, 42.78, 41.11, 40.37, 38.66, 25.78, 23.25, 22.14. LC-MS (linear gradient 10  $\rightarrow$  90% MeCN/H<sub>2</sub>O, 0.1% TFA, 15.0 min): Rt (min): 5.84 (ESI-MS (m/z): 598.00, (M+H<sup>+</sup>)). HRMS calculated for C<sub>29</sub>H<sub>39</sub>N<sub>7</sub>O<sub>5</sub>S 598.28061 [M+H]<sup>+</sup>; found 598.28052.

Pyra-Leu-Ala-Phe(4-CH<sub>2</sub>NH<sub>2</sub>)-VS TFA salt (**19**). This compound was prepared according to the general procedure D on a 70  $\mu\text{mol}$  scale, followed by the removal of the Boc protecting group using the general procedure B. Purification by HPLC (40%-45% MeCN-H<sub>2</sub>O) yielded the title compound (12.1 mg, 18.4  $\mu\text{mol}$ , 26%).  $^1\text{H}$  NMR (400 MHz, MeOD)  $\delta$  9.24 (d,  $J = 1.5$  Hz, 1H), 8.82 (d,  $J = 2.5$  Hz, 1H), 8.72 (dd,  $J = 2.5, 1.5$  Hz, 1H), 7.38 (d,  $J = 8.2$  Hz, 2H), 7.36-7.31 (m, 2H), 6.83 (dd,  $J = 15.2, 4.9$  Hz, 1H), 6.63 (dd,  $J = 15.2, 1.6$  Hz, 1H), 4.85-4.80 (m, 1H), 4.63-4.59 (m, 1H), 4.30-4.24 (m, 1H), 4.09 (s, 2H), 3.07-2.99 (m, 2H), 2.95 (s, 3H), 1.84-1.70 (m, 3H), 1.32 (d,  $J = 7.2$  Hz, 3H), 1.02-0.96 (m, 6H).  $^{13}\text{C}$  NMR

(100 MHz, MeOD)  $\delta$  173.10, 164.24, 147.45, 145.24, 144.41, 143.43, 138.21, 131.59, 130.38, 129.85, 128.81, 52.47, 50.96, 49.52, 42.65, 41.35, 40.47, 38.85, 24.72, 22.06, 20.55, 16.41. LC-MS (linear gradient 10  $\rightarrow$  90% MeCN/H<sub>2</sub>O, 0.1% TFA, 12.5 min): Rt (min): 4.39 (ESI-MS (m/z): 545.13, (M+H<sup>+</sup>)). HRMS calculated for C<sub>26</sub>H<sub>36</sub>N<sub>6</sub>O<sub>5</sub>S 546.25407 [M+H]<sup>+</sup>; found 546.25373.

Methia-Leu-Ser(Me)-Phe(4-CH<sub>2</sub>NH<sub>2</sub>)-VS TFA salt (**20**). This compound was prepared according to the general procedure D on a 50  $\mu$ mol scale, followed by the removal of the Boc protecting group using the general procedure B. Purification by HPLC (40%-45% MeCN-H<sub>2</sub>O) yielded the title compound (10.6 mg, 14.0  $\mu$ mol, 28%). <sup>1</sup>H NMR (600 MHz, MeOD)  $\delta$  8.27 (s, 1H), 7.40 (d, J = 8.2 Hz, 2H), 7.37-7.34 (m, 2H), 6.83 (dd, J = 15.1, 4.4 Hz, 1H), 6.69 (dd, J = 15.2, 1.8 Hz, 1H), 4.53 (dd, J = 9.9, 5.0 Hz, 1H), 4.46 (t, J = 5.5 Hz, 1H), 4.11 (s, 2H), 3.69 (dd, J = 9.6, 5.4 Hz, 1H), 3.59 (dd, J = 9.6, 5.6 Hz, 1H), 3.35 (s, 3H), 3.09-2.98 (m, 2H), 2.96 (s, 3H), 2.75 (s, 3H), 1.84-1.66 (m, 3H), 1.02 (d, J = 6.3 Hz, 3H), 0.98 (d, J = 6.3 Hz, 3H). <sup>13</sup>C NMR (150 MHz, MeOD)  $\delta$  174.79, 173.15, 171.57, 163.17, 146.74, 144.56, 139.67, 135.22, 132.97, 131.83, 131.21, 130.21, 72.60, 59.35, 54.89, 54.37, 52.60, 44.06, 42.85, 41.17, 40.09, 26.08, 23.39, 21.91, 19.13. LC-MS (linear gradient 10  $\rightarrow$  90% MeCN/H<sub>2</sub>O, 0.1% TFA, 12.5 min): Rt (min): 4.59 (ESI-MS (m/z) 594.13 (M+H<sup>+</sup>)). HRMS calculated for C<sub>27</sub>H<sub>39</sub>N<sub>5</sub>O<sub>6</sub>S<sub>2</sub> 594.24145 [M+H]<sup>+</sup>; found 594.24120.

Methia-Chg-Leu-Phe(4-CH<sub>2</sub>NH<sub>2</sub>)-VS (**21**). This compound was prepared according to the general procedure D on a 50  $\mu$ mol scale, followed by the removal of the Boc protecting group using the general procedure B. Purification by HPLC (35%-40% MeCN-H<sub>2</sub>O) yielded the title compound (11.2 mg, 15.0  $\mu$ mol, 30%). <sup>1</sup>H NMR (600 MHz, MeOD)  $\delta$  8.40-8.16 (m, 2H), 7.40 (d, J = 8.1 Hz, 2H), 7.33 (d, J = 8.1 Hz, 2H), 6.82-6.78 (m, 1H), 6.61-6.59 (m, 1H), 4.86-4.81 (m, 1H), 4.38-4.36 (m, 1H), 4.30-4.21 (m, 1H), 4.10 (s, 2H), 3.06-2.97 (m, 2H), 2.95 (s, 3H), 2.74 (s, 3H), 1.92-1.59 (m, 8H), 1.37-1.10 (m, 6H), 0.95-0.90 (m, 6H). <sup>13</sup>C NMR (150 MHz, MeOD)  $\delta$  174.30, 174.22, 173.73, 173.65, 173.04, 163.12, 146.41, 144.46, 139.52, 135.40, 133.01, 131.93, 131.26, 130.24, 61.26, 53.62, 53.53, 52.57, 52.48, 44.02, 42.76, 41.40, 41.36, 40.66, 40.42, 40.39, 30.89, 30.77, 30.69, 27.24, 27.06, 25.90, 23.46, 21.66,



19.12. LC-MS (linear gradient 10 → 90% MeCN/H<sub>2</sub>O, 0.1% TFA, 12.5 min): Rt (min): 5.34 (ESI-MS (m/z): 632.20, (M+H<sup>+</sup>)). HRMS calculated for C<sub>31</sub>H<sub>45</sub>N<sub>5</sub>O<sub>5</sub>S<sub>2</sub> 632.29349 [M+H]<sup>+</sup>; found 632.29352.

Methia-Cha-Leu-Phe(4-CH<sub>2</sub>NH<sub>2</sub>)-VS TFA salt (**22**). This compound was prepared according to the general procedure D on a 50 μmol scale, followed by the removal of the Boc protecting group using the general procedure B. Purification by HPLC (40%-45% MeCN-H<sub>2</sub>O) yielded the title compound (12.3 mg, 16.2 μmol, 32%). <sup>1</sup>H NMR (400 MHz, MeOD) δ 8.28 (s, 1H), 7.48-7.19 (m, 4H), 6.85-6.79 (m, 1H), 6.63-6.59 (m, 1H), 4.87-4.81 (m, 1H), 4.54-4.50 (m, 1H), 4.35-4.31 (m, 1H), 4.10 (s, 2H), 3.07-2.98 (m, 2H), 2.96 (s, 3H), 2.75 (s, 3H), 1.85-0.84 (m, 22H). <sup>13</sup>C NMR (100 MHz, MeOD) δ 175.03, 174.26, 173.11, 163.18, 146.53, 144.56, 139.59, 135.34, 132.97, 131.87, 131.25, 130.22, 53.90, 53.60, 52.43, 44.05, 42.77, 41.28, 40.35, 39.90, 35.52, 34.71, 33.56, 27.54, 27.35, 27.25, 25.95, 23.47, 21.68, 19.13. LC-MS (linear gradient 10 → 90% MeCN/H<sub>2</sub>O, 0.1% TFA, 12.5 min): Rt (min): 5.71 (ESI-MS (m/z): 646.27, (M+H<sup>+</sup>)). HRMS calculated for C<sub>32</sub>H<sub>47</sub>N<sub>5</sub>O<sub>5</sub>S<sub>2</sub> 646.30914 [M+H]<sup>+</sup>; found 646.30902.

Methia-HomoCha-Leu-Phe(4-CH<sub>2</sub>NH<sub>2</sub>)-VS TFA salt (**23**). This compound was prepared according to the general procedure D on a 50 μmol scale, followed by the removal of the Boc protecting group using the general procedure B. Purification by HPLC (40%-50% MeCN-H<sub>2</sub>O) yielded the title compound (15.9 mg, 20.6 μmol, 41%). <sup>1</sup>H NMR (600 MHz, MeOD) δ 8.29 (s, 1H), 7.40 (d, J = 8.0 Hz, 2H), 7.35-7.31 (m, 2H), 6.83-6.80 (m, 1H), 6.63-6.60 (m, 1H), 4.36-4.33 (m, 2H), 4.10 (s, 2H), 3.02 (d, J = 7.6 Hz, 2H), 2.96 (s, 3H), 2.74 (s, 3H), 1.95-1.60 (m, 10H), 1.56-1.51 (m, 1H), 1.38-1.23 (m, 6H), 0.97-0.89 (m, 8H). <sup>13</sup>C NMR (150 MHz, MeOD) δ 174.71, 174.26, 173.05, 163.31, 146.47, 144.62, 139.58, 135.33, 132.98, 131.91, 131.24, 130.22, 56.81, 53.62, 52.44, 44.04, 42.79, 41.16, 40.39, 38.77, 34.73, 34.47, 34.36, 29.99, 27.70, 27.40, 25.95, 23.48, 21.66, 19.13. LC-MS (linear gradient 10 → 90% MeCN/H<sub>2</sub>O, 0.1% TFA, 12.5 min): Rt (min): 6.01 (ESI-MS (m/z): 660.27, (M+H<sup>+</sup>)). HRMS calculated for C<sub>33</sub>H<sub>49</sub>N<sub>5</sub>O<sub>5</sub>S<sub>2</sub> 660.32479 [M+H]<sup>+</sup>; found 660.32481.

Methia-Cha(4-Me)-Leu-Phe(4-CH<sub>2</sub>NH<sub>2</sub>)-VS TFA salt (**24**). This compound was prepared according to the general procedure D on a 80 μmol scale, followed by the removal of the Boc protecting group using

the general procedure B. Purification by HPLC (42%-47% MeCN-H<sub>2</sub>O) yielded the title compound (18.5 mg, 10.4 μmol, 24%). <sup>1</sup>H NMR (600 MHz, MeOD) δ 8.27 (d, J = 1.2 Hz, 1H), 7.40 (d, J = 7.9 Hz, 2H), 7.36-7.30 (m, 2H), 6.84-6.80 (m, 1H), 6.63-6.59 (m, 1H), 4.54-4.48 (m, 1H), 4.35-4.32 (m, 1H), 4.10 (s, 2H), 3.02-3.00 (m, 2H), 2.96 (s, 3H), 2.74 (s, 3H), 1.92-1.30 (m, 14H), 0.99-0.84 (m, 10H). <sup>13</sup>C NMR (150 MHz, MeOD) δ 175.00, 174.27, 173.08, 163.20, 146.52, 144.59, 139.58, 135.32, 132.97, 131.89, 131.24, 130.21, 54.32, 54.06, 53.62, 52.42, 44.05, 42.79, 41.31, 40.34, 39.84, 36.28, 36.18, 35.32, 34.63, 33.95, 33.54, 31.83, 31.64, 30.18, 28.77, 25.94, 23.45, 23.01, 21.70, 19.13. LC-MS (linear gradient 10 → 90% MeCN/H<sub>2</sub>O, 0.1% TFA, 12.5 min): Rt (min): 5.99 (ESI-MS (m/z): 660.27, (M+H<sup>+</sup>)). HRMS calculated for C<sub>33</sub>H<sub>49</sub>N<sub>5</sub>O<sub>5</sub>S<sub>2</sub> 660.32479 [M+H]<sup>+</sup>; found 660.32493.

Methia-Cha(4-OMe)-Leu-Phe(4-CH<sub>2</sub>NH<sub>2</sub>)-VS TFA salt (**25**). This compound was prepared according to the general procedure D on a 50 μmol scale, followed by the removal of the Boc protecting group using the general procedure B. Purification by HPLC (30%-40% MeCN-H<sub>2</sub>O) yielded the title compound (13.4 mg, 17.0 μmol, 34%). <sup>1</sup>H NMR (400 MHz, MeOD) δ 8.27 (s, 1H), 7.45-7.24 (m, 4H), 6.84-6.79 (m, 1H), 6.62-6.58 (m, 1H), 4.86-4.81 (m, 1H), 4.53-4.49 (m, 1H), 4.34-4.30 (m, 1H), 4.10 (s, 2H), 3.45 (t, J = 3.6 Hz, 1H), 3.02-2.97 (m, 2H), 2.95 (s, 3H), 2.74 (s, 3H), 1.98-1.25 (m, 14H), 0.95-0.87 (m, 6H). <sup>13</sup>C NMR (100 MHz, MeOD) δ 174.95, 174.27, 173.11, 163.16, 146.55, 144.55, 139.60, 135.34, 132.97, 131.86, 131.25, 130.22, 76.75, 55.83, 53.92, 53.61, 52.42, 44.05, 42.77, 41.30, 40.32, 39.14, 34.47, 29.90, 29.77, 28.53, 27.41, 25.95, 23.46, 21.69, 19.13. LC-MS (linear gradient 10 → 90% MeCN/H<sub>2</sub>O, 0.1% TFA, 12.5 min): Rt (min): 5.20 (ESI-MS (m/z): 676.33, (M+H<sup>+</sup>)). HRMS calculated for C<sub>33</sub>H<sub>49</sub>N<sub>5</sub>O<sub>6</sub>S<sub>2</sub> 676.31970 [M+H]<sup>+</sup>; found 676.31980.

Methia-1-DecAla-Leu-Phe(4-CH<sub>2</sub>NH<sub>2</sub>)-VS TFA salt (**26**). This compound was prepared according to the general procedure D on a 50 μmol scale, followed by the removal of the Boc protecting group using the general procedure B. Purification by HPLC (40%-50% MeCN-H<sub>2</sub>O) yielded the title compound (11.1 mg, 13.6 μmol, 27%). <sup>1</sup>H NMR (600 MHz, MeOD) δ 8.29-8.25 (m, 1H), 7.40 (d, J = 7.8 Hz, 2H), 7.34-7.30 (m, 2H), 6.86-6.77 (m, 1H), 6.66-6.58 (m, 1H), 4.86-4.81 (m, 1H), 4.49-4.39 (m, 1H), 4.39-4.26 (m, 1H), 4.10 (d, J = 2.5 Hz, 2H), 3.95-3.85 (m, 1H), 3.68 (s, 1H), 3.27-3.21 (m, 1H), 3.02-2.96

(m, 5H), 2.75-2.74 (m, 3H), 1.84-1.20 (m, 22H), 0.96-0.88 (m, 6H). <sup>13</sup>C NMR (150 MHz, MeOD) δ 175.04, 174.69, 174.26, 174.12, 173.14, 163.27, 163.22, 146.50, 146.34, 144.67, 144.63, 144.57, 139.58, 132.99, 131.94, 131.87, 131.25, 130.23, 68.13, 64.91, 54.21, 53.60, 52.45, 44.64, 44.55, 44.04, 42.76, 41.73, 41.21, 41.14, 40.70, 40.38, 39.41, 39.10, 39.01, 38.97, 36.77, 36.27, 33.72, 30.89, 28.42, 27.97, 27.81, 26.57, 25.97, 23.49, 22.34, 21.68, 21.15, 20.77, 19.14. LC-MS (linear gradient 10 → 90% MeCN/H<sub>2</sub>O, 0.1% TFA, 12.5 min): Rt (min): 6.49 (ESI-MS (m/z): 700.27, (M+H<sup>+</sup>)). HRMS calculated for C<sub>36</sub>H<sub>53</sub>N<sub>5</sub>O<sub>5</sub>S<sub>2</sub> 700.35609 [M+H]<sup>+</sup>; found 700.35626.

Methia-2-DecAla-Leu-Phe(4-CH<sub>2</sub>NH<sub>2</sub>)-VS TFA salt (**27**). This compound was prepared according to the general procedure D on a 50 μmol scale, followed by the removal of the Boc protecting group using the general procedure B. Purification by HPLC (40%-50% MeCN-H<sub>2</sub>O) yielded the title compound (14.8 mg, 18.2 μmol, 36%). <sup>1</sup>H NMR (600 MHz, MeOD) δ 8.31-8.22 (m, 1H), 7.40 (d, J = 8.1 Hz, 2H), 7.33 (d, J = 7.9 Hz, 2H), 6.83-6.80 (m, 1H), 6.62-6.59 (m, 1H), 4.57-4.50 (m, 1H), 4.35-4.32 (m, 1H), 4.10 (s, 2H), 3.05-2.96 (m, 5H), 2.74 (s, 3H), 1.82-1.20 (m, 22H), 0.95 (d, J = 6.2 Hz, 3H), 0.91 (d, J = 6.3 Hz, 3H). <sup>13</sup>C NMR (150 MHz, MeOD) δ 175.09, 175.03, 174.29, 173.08, 163.17, 146.52, 144.58, 139.58, 135.34, 132.97, 131.90, 131.25, 130.22, 53.97, 53.90, 53.62, 52.43, 44.06, 42.79, 41.31, 40.36, 40.07, 37.53, 37.37, 37.33, 37.24, 37.22, 36.31, 36.28, 34.00, 33.55, 33.49, 33.35, 33.29, 32.97, 30.89, 29.00, 28.13, 27.95, 26.85, 25.96, 23.46, 21.98, 21.72, 19.13. LC-MS (linear gradient 10 → 90% MeCN/H<sub>2</sub>O, 0.1% TFA, 12.5 min): Rt (min): 6.55 (ESI-MS (m/z): 700.33, (M+H<sup>+</sup>)). HRMS calculated for C<sub>36</sub>H<sub>53</sub>N<sub>5</sub>O<sub>5</sub>S<sub>2</sub> 700.35609 [M+H]<sup>+</sup>; found 700.35633.

Methia-BiCha-Leu-Phe(4-CH<sub>2</sub>NH<sub>2</sub>)-VS TFA salt (**28**). This compound was prepared according to the general procedure D on a 50 μmol scale, followed by the removal of the Boc protecting group using the general procedure B. Purification by HPLC (45%-55% MeCN-H<sub>2</sub>O) yielded the title compound (7.7 mg, 9.2 μmol, 18%). <sup>1</sup>H NMR (600 MHz, MeOD) δ 8.26 (s, 1H), 7.44-7.37 (m, 2H), 7.34-7.32 (m, 2H), 6.83-6.79 (m, 1H), 6.62-6.59 (m, 1H), 4.91-4.76 (m, 1H), 4.53-4.46 (m, 1H), 4.35-4.31 (m, 1H), 4.10 (s, 2H), 3.02-3.00 (m, 2H), 2.96 (s, 3H), 2.75 (s, 3H), 1.94-1.44 (m, 18H), 1.3-1.14 (m, 6H), 0.96-0.90 (m, 8H). <sup>13</sup>C NMR (150 MHz, MeOD) δ 175.12, 175.04, 174.35, 174.27, 173.10, 163.20, 163.16,

146.46, 144.56, 139.59, 135.36, 132.98, 131.88, 131.27, 130.23, 126.12, 54.43, 54.39, 54.07, 54.04, 53.72, 53.68, 53.63, 53.59, 52.55, 52.53, 52.46, 52.43, 44.69, 44.04, 42.76, 41.27, 40.37, 39.86, 36.16, 35.81, 34.92, 33.87, 32.56, 31.72, 31.41, 30.96, 30.89, 29.49, 27.94, 27.86, 26.74, 26.53, 25.97, 23.48, 21.68, 19.13. LC-MS (linear gradient 10 → 90% MeCN/H<sub>2</sub>O, 0.1% TFA, 12.5 min): Rt (min): 7.08 (ESI-MS (m/z): 728.27, (M+H<sup>+</sup>)). HRMS calculated for C<sub>38</sub>H<sub>57</sub>N<sub>5</sub>O<sub>5</sub>S<sub>2</sub> 728.38739 [M+H]<sup>+</sup>; found 728.38763.

Methia-Leu-Cha-Phe(4-CH<sub>2</sub>NH<sub>2</sub>)-VS TFA salt (**29**). This compound was prepared according to the general procedure D on a 50 μmol scale, followed by the removal of the Boc protecting group using the general procedure B. Purification by HPLC (38%-43% MeCN-H<sub>2</sub>O) yielded the title compound (11.0 mg, 14.5 μmol, 29%). <sup>1</sup>H NMR (400 MHz, MeOD) δ 8.28 (s, 1H), 7.48-7.25 (m, 4H), 6.85-6.79 (m, 1H), 6.62-6.58 (m, 1H), 4.89-4.78 (m, 1H), 4.52-4.50 (m, 1H), 4.38-4.35 (m, 1H), 4.10 (s, 2H), 3.07-2.98 (m, 2H), 2.96 (s, 3H), 2.75 (s, 3H), 1.83-0.79 (m, 22H). <sup>13</sup>C NMR (100 MHz, MeOD) δ 174.77, 174.37, 173.11, 163.13, 146.56, 144.54, 139.61, 135.36, 132.96, 131.85, 131.25, 130.22, 54.44, 52.80, 52.40, 44.06, 42.79, 41.12, 40.30, 40.02, 35.40, 34.85, 33.14, 27.51, 27.40, 27.19, 26.07, 23.27, 22.17, 19.13. LC-MS (linear gradient 10 → 90% MeCN/H<sub>2</sub>O, 0.1% TFA, 12.5 min): Rt (min): 5.59 (ESI-MS (m/z): 646.27, (M+H<sup>+</sup>)). HRMS calculated for C<sub>32</sub>H<sub>47</sub>N<sub>5</sub>O<sub>5</sub>S<sub>2</sub> 646.30914 [M+H]<sup>+</sup>; found 646.30930.

Methia-Leu-HomoCha-Phe(4-CH<sub>2</sub>NH<sub>2</sub>)-VS TFA salt (**30**). This compound was prepared according to the general procedure D on a 50 μmol scale, followed by the removal of the Boc protecting group using the general procedure B. Purification by HPLC (40%-50% MeCN-H<sub>2</sub>O) yielded the title compound (13.0 mg, 16.8 μmol, 34%). <sup>1</sup>H NMR (400 MHz, MeOD) δ 8.27 (s, 1H), 7.50-7.17 (m, 4H), 6.85-6.80 (m, 1H), 6.62-6.58 (m, 1H), 4.87-4.83 (m, 1H), 4.56-4.52 (m, 1H), 4.23-4.19 (m, 1H), 4.10 (s, 2H), 3.09-2.88 (m, 5H), 2.75 (s, 3H), 1.89-1.53 (m, 10H), 1.40-0.76 (m, 14H). <sup>13</sup>C NMR (100 MHz, MeOD) δ 174.77, 173.84, 173.11, 163.08, 146.61, 144.52, 139.59, 135.35, 132.97, 131.88, 131.25, 130.23, 55.31, 54.29, 52.41, 44.06, 42.80, 41.13, 40.26, 38.53, 34.52, 34.48, 34.20, 30.17, 27.68, 27.38, 27.35, 26.07, 23.35, 22.03, 19.13. LC-MS (linear gradient 10 → 90% MeCN/H<sub>2</sub>O, 0.1% TFA, 12.5 min): Rt (min):

5.99 (ESI-MS (m/z): 600.27, (M+H<sup>+</sup>)). HRMS calculated for C<sub>33</sub>H<sub>49</sub>N<sub>5</sub>O<sub>5</sub>S<sub>2</sub> 660.32479 [M+H]<sup>+</sup>; found 660.32494.

Methia-Leu-Cha(4-Me)-Phe(4-CH<sub>2</sub>NH<sub>2</sub>)-VS TFA salt (**31**). This compound was prepared according to the general procedure D on a 50 μmol scale, followed by the removal of the Boc protecting group using the general procedure B. Purification by HPLC (42%-47% MeCN-H<sub>2</sub>O) yielded the title compound (15.4 mg, 19.9 μmol, 40%). <sup>1</sup>H NMR (600 MHz, MeOD) δ 8.28-8.27 (m, 1H), 7.43-7.26 (m, 4H), 6.85-6.81 (m, 1H), 6.63-6.59 (m, 1H), 4.54-4.50 (m, 1H), 4.39-4.31 (m, 1H), 4.11 (s, 2H), 3.08-2.84 (m, 5H), 2.75 (s, 3H), 1.82-1.23 (m, 15H), 1.04-0.97 (m, 6H), 0.94 (d, J = 6.9 Hz, 2H), 0.86 (d, J = 6.5 Hz, 1H). <sup>13</sup>C NMR (150 MHz, MeOD) δ 174.85, 174.73, 174.38, 174.35, 173.10, 163.18, 163.11, 146.58, 144.58, 139.62, 135.33, 132.96, 131.89, 131.25, 130.22, 54.51, 54.38, 53.29, 52.92, 52.39, 44.06, 42.82, 41.14, 41.00, 40.29, 39.92, 36.29, 36.08, 35.16, 34.76, 33.88, 33.11, 33.01, 31.91, 31.62, 31.12, 30.90, 30.25, 28.29, 26.08, 26.06, 23.29, 23.27, 22.99, 22.19, 22.12, 19.13. LC-MS (linear gradient 10 → 90% MeCN/H<sub>2</sub>O, 0.1% TFA, 12.5 min): Rt (min): 5.95 (ESI-MS (m/z): 660.27, (M+H<sup>+</sup>)). HRMS calculated for C<sub>33</sub>H<sub>49</sub>N<sub>5</sub>O<sub>5</sub>S<sub>2</sub> 660.32479 [M+H]<sup>+</sup>; found 660.32476.

Methia-Leu-Cha(4-OMe)-Phe(4-CH<sub>2</sub>NH<sub>2</sub>)-VS TFA salt (**32**). This compound was prepared according to the general procedure D on a 50 μmol scale, followed by the removal of the Boc protecting group using the general procedure B. Purification by HPLC (30%-40% MeCN-H<sub>2</sub>O) yielded the title compound (10.4 mg, 13.2 μmol, 26%). <sup>1</sup>H NMR (600 MHz, MeOD) δ 8.27 (s, 1H), 7.42-7.30 (m, 4H), 6.84-6.80 (m, 1H), 6.61-6.59 (m, 1H), 4.53-4.51 (m, 1H), 4.38-4.33 (m, 1H), 4.11 (s, 2H), 3.43-3.37 (m, 1H), 3.30 (s, 3H), 3.05-2.98 (m, 2H), 2.96 (s, 3H), 2.75 (s, 3H), 1.89-1.65 (m, 6H), 1.60-1.58 (m, 2H), 1.50-1.42 (m, 3H), 1.37-1.28 (m, 3H), 1.04-0.97 (m, 6H). <sup>13</sup>C NMR (150 MHz, MeOD) δ 174.85, 174.77, 174.29, 173.10, 163.09, 146.55, 144.53, 139.64, 135.37, 132.96, 131.89, 131.27, 130.21, 76.73, 55.82, 54.41, 54.37, 52.97, 52.88, 52.52, 52.43, 44.08, 42.79, 41.14, 40.27, 39.38, 34.35, 30.90, 29.95, 29.71, 28.69, 26.98, 26.09, 23.30, 22.12, 19.13. LC-MS (linear gradient 10 → 90% MeCN/H<sub>2</sub>O, 0.1% TFA, 12.5 min): Rt (min): 5.17 (ESI-MS (m/z): 676.20, (M+H<sup>+</sup>)). HRMS calculated for C<sub>33</sub>H<sub>49</sub>N<sub>5</sub>O<sub>6</sub>S<sub>2</sub> 676.31970 [M+H]<sup>+</sup>; found 676.31964.

Methia-Leu-1-DecAla-Phe(4-CH<sub>2</sub>NH<sub>2</sub>)-VS TFA salt (**33**). This compound was prepared according to the general procedure D on a 50 μmol scale, followed by the removal of the Boc protecting group using the general procedure B. Purification by HPLC (40%-50% MeCN-H<sub>2</sub>O) yielded the title compound (9.9 mg, 12.2 μmol, 24%). <sup>1</sup>H NMR (600 MHz, MeOD) δ 8.31-8.24 (m, 1H), 7.41-7.39 (m, 2H), 7.36-7.32 (tm, 2H), 6.87-6.78 (m, 1H), 6.63-6.54 (m, 1H), 4.87-4.83 (m, 1H), 4.58-4.47 (m, 1H), 4.42-4.23 (m, 1H), 4.10 (s, 2H), 3.94-3.84 (m, 1H), 3.68 (s, 1H), 3.28-3.19 (m, 1H), 3.06-2.90 (m, 5H), 2.80-2.69 (m, 3H), 1.84-1.48 (m, 11H), 1.44-1.15 (m, 9H), 1.07-0.91 (m, 8H). <sup>13</sup>C NMR (150 MHz, MeOD) δ 174.82, 174.71, 174.67, 174.41, 174.36, 173.15, 163.21, 163.11, 146.61, 146.55, 146.51, 144.53, 139.64, 139.61, 139.56, 135.42, 132.96, 131.95, 131.82, 131.27, 131.23, 130.22, 126.12, 68.13, 64.90, 54.83, 54.61, 54.34, 54.30, 53.12, 52.56, 52.42, 44.63, 44.41, 44.06, 42.79, 42.43, 41.03, 40.75, 40.29, 39.80, 39.58, 39.10, 39.06, 38.78, 37.22, 35.62, 35.44, 33.72, 32.52, 27.90, 27.71, 27.50, 26.98, 26.93, 26.52, 26.06, 26.03, 23.29, 23.23, 22.26, 22.18, 19.14. LC-MS (linear gradient 10 → 90% MeCN/H<sub>2</sub>O, 0.1% TFA, 12.5 min): Rt (min): 6.26 (ESI-MS (m/z): 700.33, (M+H<sup>+</sup>)). HRMS calculated for C<sub>36</sub>H<sub>53</sub>N<sub>5</sub>O<sub>5</sub>S<sub>2</sub> 700.35609 [M+H]<sup>+</sup>; found 700.35632.

Methia-Leu-2-DecAla-Phe(4-CH<sub>2</sub>NH<sub>2</sub>)-VS TFA salt (**34**). This compound was prepared according to the general procedure D on a 50 μmol scale, followed by the removal of the Boc protecting group using the general procedure B. Purification by HPLC (40%-50% MeCN-H<sub>2</sub>O) yielded the title compound (16.5 mg, 20.3 μmol, 41%). <sup>1</sup>H NMR (600 MHz, MeOD) δ 8.29-8.23 (m, 1H), 7.40 (d, J = 8.1 Hz, 2H), 7.36-7.30 (m, 2H), 6.84-6.81 (m, 1H), 6.62-6.58 (n, 1H), 4.57-4.48 (m, 1H), 4.40-4.36 (m, 1H), 4.10 (s, 2H), 3.07-2.94 (m, 5H), 2.74 (s, 3H), 1.82-1.07 (m, 22H), 1.05-0.97 (m, 6H). <sup>13</sup>C NMR (150 MHz, MeOD) δ 174.73, 174.44, 174.36, 173.11, 163.10, 146.60, 144.56, 139.61, 135.38, 132.96, 131.84, 131.25, 130.22, 54.43, 54.41, 54.27, 52.91, 52.78, 52.39, 44.07, 42.81, 41.08, 40.32, 40.19, 40.07, 37.52, 37.46, 37.24, 37.20, 36.28, 36.13, 34.09, 33.55, 33.47, 33.37, 33.23, 32.42, 30.90, 29.17, 28.10, 27.57, 26.83, 26.07, 23.28, 22.18, 21.99, 19.13. LC-MS (linear gradient 10 → 90% MeCN/H<sub>2</sub>O, 0.1% TFA, 12.5 min): Rt (min): 6.38 (ESI-MS (m/z): 700.33, (M+H<sup>+</sup>)). HRMS calculated for C<sub>36</sub>H<sub>53</sub>N<sub>5</sub>O<sub>5</sub>S<sub>2</sub> 700.35609 [M+H]<sup>+</sup>; found 700.35629.

Methia-Leu-BiCha-Phe(4-CH<sub>2</sub>NH<sub>2</sub>)-VS TFA salt (**35**). This compound was prepared according to the general procedure D on a 50 μmol scale, followed by the removal of the Boc protecting group using the general procedure B. Purification by HPLC (45%-50% MeCN-H<sub>2</sub>O) yielded the title compound (12.0 mg, 14.3 μmol, 29%). <sup>1</sup>H NMR (600 MHz, MeOD) δ 8.35-8.24 (m, 1H), 7.48-7.25 (m, 4H), 6.83-6.79 (m, 1H), 6.62-6.59 (m, 1H), 4.91-4.76 (m, 1H), 4.53-4.46 (m, 1H), 4.35-4.31 (m, 1H), 4.10 (s, 2H), 3.02-3.00 (m, 2H), 2.96 (s, 3H), 2.75 (s, 3H), 1.96-1.44 (m, 18H), 1.28-1.06 (m, 6H), 0.96-0.90 (m, 8H). <sup>13</sup>C NMR (150 MHz, MeOD) δ 175.12, 175.04, 175.02, 174.35, 174.27, 173.10, 163.20, 146.48, 144.56, 139.59, 135.36, 132.98, 131.88, 131.27, 130.23, 126.12, 54.43, 54.39, 54.07, 54.04, 53.72, 53.68, 53.63, 53.59, 52.55, 52.53, 52.46, 52.43, 44.72, 44.69, 44.04, 42.76, 41.27, 41.24, 40.37, 39.86, 36.16, 35.81, 34.92, 33.87, 32.56, 31.72, 31.41, 30.96, 30.89, 29.49, 27.94, 27.86, 27.84, 26.74, 26.53, 25.97, 23.48, 21.68, 19.13. LC-MS (linear gradient 10 → 90% MeCN/H<sub>2</sub>O, 0.1% TFA, 12.5 min): Rt (min): 6.90 (ESI-MS (m/z): 728.40, (M+H<sup>+</sup>)). HRMS calculated for C<sub>38</sub>H<sub>57</sub>N<sub>5</sub>O<sub>5</sub>S<sub>2</sub> 728.38739 [M+H]<sup>+</sup>; found 728.38769.

Methia-Cha-Cha-Phe(4-CH<sub>2</sub>NH<sub>2</sub>)-VS TFA salt (**36**). This compound was prepared according to the general procedure D on a 50 μmol scale, followed by the removal of the Boc protecting group using the general procedure B. Purification by HPLC (42%-47% MeCN-H<sub>2</sub>O) yielded the title compound (6.5 mg, 9.2 μmol, 18%). <sup>1</sup>H NMR (600 MHz, MeOD) δ 8.26 (s, 1H), 7.38 (d, J = 8.1 Hz, 2H), 7.33-7.27 (m, 2H), 6.79 (dd, J = 15.2, 5.2 Hz, 1H), 6.58 (dd, J = 15.2, 1.5 Hz, 1H), 4.85-4.80 (m, 1H), 4.52-4.49 (m, 1H), 4.37-4.33 (m, 1H), 4.08 (s, 2H), 3.02-2.96 (m, 2H), 2.94 (s, 3H), 2.73 (s, 3H), 2.66 (s, 1H), 1.93-0.77 (m, 27H). <sup>13</sup>C NMR (150 MHz, MeOD) δ 174.97, 174.89, 174.43, 174.35, 173.14, 163.13, 146.55, 144.55, 139.60, 135.38, 132.98, 131.85, 131.26, 130.23, 53.82, 52.89, 52.86, 52.80, 52.77, 52.51, 52.42, 44.05, 42.78, 40.35, 40.01, 39.97, 39.81, 35.48, 35.39, 34.88, 34.65, 33.68, 33.12, 27.55, 27.52, 27.42, 27.35, 27.25, 27.21, 19.14. LC-MS (linear gradient 10 → 90% MeCN/H<sub>2</sub>O, 0.1% TFA, 12.5 min): Rt (min): 6.12 (ESI-MS (m/z): 686.33, (M+H<sup>+</sup>)). HRMS calculated for C<sub>35</sub>H<sub>51</sub>N<sub>5</sub>O<sub>5</sub>S<sub>2</sub> 686.34044 [M+H]<sup>+</sup>; found 686.34011.

Morph-Ala-Tyr(Me)-Chg-EK TFA salt (**37**). The corresponding warhead (Boc-Chg-EK) was deprotected according to general procedure B, follow by azide coupling using the general procedure D on a 50  $\mu\text{mol}$  scale. Purification by HPLC (30%-45% MeCN-H<sub>2</sub>O) yielded the title compound (11.5 mg, 16.8  $\mu\text{mol}$ , 34%). <sup>1</sup>H NMR (600 MHz, MeOD)  $\delta$  7.10 (d, J = 8.6 Hz, 2H), 6.80 (d, J = 8.6 Hz, 2H), 4.59-4.57 (m, 1H), 4.45-4.37 (m, 2H), 3.77 (s, 3H), 3.74-3.69 (m, 4H), 3.15 (d, J = 5.0 Hz, 1H), 3.09-2.79 (m, 5H), 2.50 (t, J = 4.5 Hz, 4H), 1.80-1.63 (m, 5H), 1.51-1.46 (m, 1H), 1.44 (s, 3H), 1.33 (d, J = 7.1 Hz, 3H), 1.28-1.15 (m, 4H), 1.03-0.96 (m, 1H). <sup>13</sup>C NMR (150 MHz, MeOD)  $\delta$  210.17, 174.25, 172.96, 172.02, 159.96, 131.39, 129.81, 114.77, 67.85, 62.39, 60.09, 55.83, 55.61, 54.71, 52.22, 49.66, 41.62, 38.06, 30.89, 29.65, 27.18, 27.14, 27.03, 18.62, 16.21. LC-MS (linear gradient 10  $\rightarrow$  90% MeCN/H<sub>2</sub>O, 0.1% TFA, 12.5 min): Rt (min): 5.53 (ESI-MS (m/z): 573.33, (M+H<sup>+</sup>)). HRMS calculated for C<sub>30</sub>H<sub>44</sub>N<sub>4</sub>O<sub>7</sub> 573.32828 [M+H]<sup>+</sup>; found 573.32812.

Morp-Ala-Tyr(Me)-Cha(4,4-2F)-EK TFA salt (**38**). The corresponding warhead (Boc-Cha(4,4-2F)-EK) was deprotected according to general procedure B, follow by azide coupling using the general procedure D on a 50  $\mu\text{mol}$  scale. Purification by HPLC (30%-45% MeCN-H<sub>2</sub>O) yielded the title compound (11.4 mg, 15.5  $\mu\text{mol}$ , 31%). <sup>1</sup>H NMR (400 MHz, MeOD)  $\delta$  7.19-7.11 (m, 2H), 6.87-6.76 (m, 2H), 4.62-4.50 (m, 2H), 4.37 (q, J = 7.1 Hz, 1H), 4.03-3.85 (m, 6H), 3.78 (s, 3H), 3.19 (d, J = 5.0 Hz, 1H), 3.06-3.01 (m, 1H), 2.96 (d, J = 5.0 Hz, 1H), 2.88-2.82 (m, 1H), 2.07-1.50 (m, 8H), 1.48 (s, 3H), 1.43-1.18 (m, 6H). <sup>13</sup>C NMR (100 MHz, MeOD)  $\delta$  208.90, 174.22, 173.38, 165.06, 159.99, 131.38, 129.91, 126.99, 124.60, 122.22, 114.80, 64.87, 59.93, 58.38, 55.84, 55.64, 53.92, 52.94, 50.66, 50.50, 38.05, 37.38, 34.60, 34.35, 34.12, 33.87, 33.65, 30.75, 30.65, 28.80, 28.71, 18.07, 16.78. LC-MS (linear gradient 10  $\rightarrow$  90% MeCN/H<sub>2</sub>O, 0.1% TFA, 12.5 min): Rt (min): 5.72 (ESI-MS (m/z): 623.00, (M+H<sup>+</sup>)). HRMS calculated for C<sub>31</sub>H<sub>44</sub>F<sub>2</sub>N<sub>4</sub>O<sub>7</sub> 623.32508 [M+H]<sup>+</sup>; found 623.32499.

Morp-Ala-Tyr(Me)-HomoCha-EK TFA salt (**39**). The corresponding warhead (Boc-HomoCha-EK) was deprotected according to general procedure B, follow by azide coupling using the general procedure D on a 50  $\mu\text{mol}$  scale. Purification by HPLC (30%-45% MeCN-H<sub>2</sub>O) yielded the title compound (12.3 mg, 17.2  $\mu\text{mol}$ , 34%). <sup>1</sup>H NMR (600 MHz, MeOD)  $\delta$  7.25-7.01 (m, 2H), 6.91-6.67 (m, 2H), 4.60-4.57 (m,



1H), 4.48-4.28 (m, 2H), 3.77 (s, 3H), 3.71-3.70 (m, 4H), 3.21 (d, J = 4.9 Hz, 1H), 3.09-2.88 (m, 4H), 2.84-2.79 (m, 1H), 2.56-2.37 (m, 4H), 1.83-1.63 (m, 6H), 1.52-1.39 (m, 4H), 1.38-1.16 (m, 9H), 0.97-0.83 (m, 2H). <sup>13</sup>C NMR (150 MHz, MeOD) δ 209.19, 174.20, 173.30, 171.99, 159.94, 131.41, 130.02, 114.75, 67.85, 62.40, 60.01, 55.75, 55.60, 54.71, 53.06, 52.92, 49.65, 38.48, 38.15, 34.61, 34.02, 29.11, 27.72, 27.44, 27.38, 18.65, 16.84. LC-MS (linear gradient 10 → 90% MeCN/H<sub>2</sub>O, 0.1% TFA, 12.5 min): Rt (min): 6.23 (ESI-MS (m/z): 601.33, (M+H<sup>+</sup>)). HRMS calculated for C<sub>32</sub>H<sub>48</sub>N<sub>4</sub>O<sub>7</sub> 601.35958 [M+H]<sup>+</sup>; found 601.35945.

Morp-Ala-Tyr(Me)-Cha(4-CF<sub>3</sub>)-EK TFA salt (**40**). The corresponding warhead (Boc-Cha(4-CF<sub>3</sub>)-EK) was deprotected according to general procedure B, follow by azide coupling using the general procedure D on a 50 μmol scale. Purification by HPLC (30%-45% MeCN-H<sub>2</sub>O) yielded the title compound (15.0 mg, 19.5 μmol, 39%). <sup>1</sup>H NMR (400 MHz, MeOD) δ 7.18-7.08 (m, 2H), 6.85-6.77 (m, 2H), 4.62-4.54 (m, 1H), 4.50-4.47 (m, 1H), 4.38-4.32 (m, 1H), 3.96-3.86 (m, 6H), 3.76 (s, 3H), 3.19-3.16 (m, 1H), 3.09-2.77 (m, 3H), 2.13 (s, 1H), 2.01-1.17 (m, 18H). <sup>13</sup>C NMR (100 MHz, MeOD) δ 209.05, 174.16, 173.34, 165.13, 159.99, 131.42, 129.96, 114.80, 64.90, 60.06, 58.44, 55.66, 53.94, 53.04, 51.07, 50.52, 41.80, 38.13, 34.96, 33.72, 33.07, 31.19, 30.80, 30.53, 27.43, 21.63, 21.11, 18.05, 16.84. LC-MS (linear gradient 10 → 90% MeCN/H<sub>2</sub>O, 0.1% TFA, 12.5 min): Rt (min): 6.18 (ESI-MS (m/z): 655.20, (M+H<sup>+</sup>)). HRMS calculated for C<sub>32</sub>H<sub>45</sub>F<sub>3</sub>N<sub>4</sub>O<sub>7</sub> 655.33131 [M+H]<sup>+</sup>; found 655.33133.

Morp-Ala-Tyr(Me)-Cha(4-Me)-EK TFA salt (**41a** and **41b**). The corresponding warhead (Boc-Cha(4-Me)-EK) was deprotected according to general procedure B, followed by azide coupling using the general procedure D on a 100 μmol scale. Purification by HPLC (35%-40% MeCN-H<sub>2</sub>O) yielded the title compounds (**41a**: 12.7 mg, 17.8 μmol, 18% and **41b**: 7.5 mg, 10.5 μmol, 11%). **41a**: <sup>1</sup>H NMR (400 MHz, CDCl<sub>3</sub>) δ 7.49 (d, J = 7.1 Hz, 1H), 7.15-7.06 (m, 2H), 6.84-6.71 (m, 3H), 6.29 (d, J = 7.8 Hz, 1H), 4.60-4.35 (m, 3H), 3.77 (s, 3H), 3.71 (t, J = 4.6 Hz, 4H), 3.26 (d, J = 5.0 Hz, 1H), 3.05-2.84 (m, 5H), 2.49 (s, 4H), 1.80-1.74 (m, 1H), 1.62-1.09 (m, 17H), 0.90 (d, J = 6.8 Hz, 3H). <sup>13</sup>C NMR (100 MHz, CDCl<sub>3</sub>) δ 208.23, 171.96, 170.77, 158.66, 130.51, 128.35, 114.06, 66.93, 61.63, 59.19, 55.32, 54.42, 53.82, 52.54, 50.10, 48.55, 36.83, 35.48, 31.71, 30.79, 30.34, 30.26, 29.97, 27.26, 20.42, 17.78, 16.83.

LC-MS (linear gradient 10 → 90% MeCN/H<sub>2</sub>O, 0.1% TFA, 12.5 min): Rt (min): 6.18 (ESI-MS (m/z): 601.27, (M+H<sup>+</sup>)). HRMS calculated for C<sub>32</sub>H<sub>48</sub>N<sub>4</sub>O<sub>7</sub> 601.35958 [M+H]<sup>+</sup>; found 601.35938. **41b**: <sup>1</sup>H NMR (400 MHz, CDCl<sub>3</sub>) δ 7.52 (s, 1H), 7.17-7.07 (m, 2H), 6.86-6.77 (m, 2H), 6.73 (d, J = 7.5 Hz, 1H), 6.24 (d, J = 7.8 Hz, 1H), 4.58-4.34 (m, 3H), 3.78 (s, 3H), 3.73 (t, J = 4.7 Hz, 4H), 3.26 (d, J = 4.0 Hz, 1H), 3.10-2.85 (m, 5H), 2.52 (s, 4H), 1.84-1.44 (m, 9H), 1.37 (d, J = 7.1 Hz, 3H), 1.31-1.06 (m, 4H), 0.89-0.83 (m, 5H). <sup>13</sup>C NMR (100 MHz, CDCl<sub>3</sub>) δ 208.26, 171.94, 170.72, 158.68, 130.53, 114.10, 66.86, 61.56, 59.17, 55.33, 54.41, 53.79, 52.52, 49.88, 48.63, 38.67, 36.83, 35.24, 34.99, 34.29, 33.97, 32.65, 32.00, 22.75, 17.71, 16.85. LC-MS (linear gradient 10 → 90% MeCN/H<sub>2</sub>O, 0.1% TFA, 12.5 min): Rt (min): 6.26 (ESI-MS (m/z): 601.27, (M+H<sup>+</sup>)). HRMS calculated for C<sub>32</sub>H<sub>48</sub>N<sub>4</sub>O<sub>7</sub> 601.35958 [M+H]<sup>+</sup>; found 601.35944.

Morp-Ala-Tyr(Me)-Cha(4-OMe)-EK TFA salt (**42**). The corresponding warhead (Boc-Cha(4-OMe)-EK) was deprotected according to general procedure B, follow by azide coupling using the general procedure D on a 80 μmol scale. Purification by HPLC (30%-40% MeCN-H<sub>2</sub>O) yielded the title compound (15.3 mg, 20.9 μmol, 26%). <sup>1</sup>H NMR (400 MHz, CDCl<sub>3</sub>) δ 7.50 (d, J = 8.0 Hz, 1H), 7.11 (d, J = 8.5 Hz, 2H), 6.82-6.78 (m, 3H), 6.29 (d, J = 7.9 Hz, 1H), 4.58-4.53 (m, 2H), 4.47-4.40 (m, 1H), 3.77 (s, 3H), 3.71 (t, J = 4.6 Hz, 4H), 3.40-3.37 (m, 1H), 3.29 (s, 3H), 3.23 (d, J = 5.0 Hz, 1H), 3.05-2.85 (m, 5H), 2.49 (s, 4H), 1.89-1.79 (m, 2H), 1.65-1.59 (m, 2H), 1.54-1.50 (m, 4H), 1.45-1.24 (m, 9H), 1.20-1.13 (m, 1H). <sup>13</sup>C NMR (100 MHz, CDCl<sub>3</sub>) δ 208.22, 171.96, 170.71, 158.66, 130.49, 128.33, 114.06, 75.24, 66.93, 61.63, 59.10, 55.67, 55.31, 54.49, 53.81, 52.45, 49.83, 48.52, 37.84, 36.91, 33.35, 29.20, 28.51, 28.00, 25.96, 17.78, 16.81. LC-MS (linear gradient 10 → 90% MeCN/H<sub>2</sub>O, 0.1% TFA, 12.5 min): Rt (min): 5.23 (ESI-MS (m/z): 617.33, (M+H<sup>+</sup>)). HRMS calculated for C<sub>32</sub>H<sub>48</sub>N<sub>4</sub>O<sub>8</sub> 617.35449 [M+H]<sup>+</sup>; found 617.35438.

Morp-Ala-Tyr(Me)-2-DecAla-EK TFA salt (**43**). The corresponding warhead (Boc-2-DecAla-EK) was deprotected according to general procedure B, followed by azide coupling using the general procedure D on a 70 μmol scale. Purification by HPLC (45%-50% MeCN-H<sub>2</sub>O) yielded the title compound (21.2 mg, 28.1 μmol, 40%). <sup>1</sup>H NMR (400 MHz, CDCl<sub>3</sub>) δ 7.50 (s, 1H), 7.12 (d, J = 8.4 Hz, 2H), 6.84-6.71

(m, 3H), 6.26 (d,  $J = 8.0$  Hz, 1H), 4.56-4.53 (m, 2H), 4.45-4.39 (m, 1H), 3.77 (s, 3H), 3.71 (t,  $J = 4.6$  Hz, 4H), 3.25-3.25 (m, 1H), 3.06-2.83 (m, 5H), 2.50 (s, 4H), 1.72-0.99 (m, 25H).  $^{13}\text{C}$  NMR (100 MHz,  $\text{CDCl}_3$ )  $\delta$  208.28, 171.96, 170.70, 158.67, 130.52, 128.37, 114.08, 66.91, 61.62, 59.23, 59.17, 55.31, 54.45, 54.41, 53.81, 49.79, 48.56, 38.94, 38.86, 36.89, 36.85, 36.13, 35.87, 35.76, 35.73, 35.29, 35.17, 33.41, 32.42, 32.38, 32.14, 31.39, 28.46, 27.09, 27.05, 26.46, 25.81, 25.75, 21.00, 17.79, 16.85. LC-MS (linear gradient 10  $\rightarrow$  90% MeCN/ $\text{H}_2\text{O}$ , 0.1% TFA, 12.5 min): Rt (min): 6.81 (ESI-MS (m/z): 641.33, ( $\text{M}+\text{H}^+$ )). HRMS calculated for  $\text{C}_{35}\text{H}_{52}\text{N}_4\text{O}_7$  641.39088 [ $\text{M}+\text{H}^+$ ] $^+$ ; found 641.39069.

Morp-Ala-Tyr(Me)-BiCha-EK TFA salt (**44a** and **44b**). The corresponding warhead (Boc-BiCha-EK) was deprotected according to general procedure B, followed by azide coupling using the general procedure D on a 87  $\mu\text{mol}$  scale. Purification by HPLC (55%-65% MeCN- $\text{H}_2\text{O}$ ) yielded the title compounds (**44a**: 17.7 mg, 22.6  $\mu\text{mol}$ , 26% and **44b**: 5.9 mg, 7.5  $\mu\text{mol}$ , 8.6%). **44a**:  $^1\text{H}$  NMR (400 MHz,  $\text{CDCl}_3$ )  $\delta$  7.50 (s, 1H), 7.15-7.07 (m, 2H), 6.84-6.70 (m, 3H), 6.30 (d,  $J = 7.8$  Hz, 1H), 4.61-4.34 (m, 3H), 3.77 (s, 3H), 3.71 (t,  $J = 4.6$  Hz, 4H), 3.27 (d,  $J = 5.0$  Hz, 1H), 3.05-2.85 (m, 5H), 2.49 (s, 4H), 1.84-1.60 (m, 6H), 1.54-1.25 (m, 15H), 1.22-1.05 (m, 6H), 0.91-0.82 (m, 2H).  $^{13}\text{C}$  NMR (100 MHz,  $\text{CDCl}_3$ )  $\delta$  208.13, 171.84, 170.68, 158.55, 130.40, 128.24, 113.95, 66.82, 61.52, 59.11, 55.21, 54.30, 53.71, 52.46, 50.07, 48.45, 41.65, 40.24, 36.72, 34.69, 31.19, 30.68, 30.51, 27.77, 26.74, 25.60, 25.13, 17.69, 16.72. LC-MS (linear gradient 10  $\rightarrow$  90% MeCN/ $\text{H}_2\text{O}$ , 0.1% TFA, 12.5 min): Rt (min): 7.37 (ESI-MS (m/z): 669.33, ( $\text{M}+\text{H}^+$ )). HRMS calculated for  $\text{C}_{37}\text{H}_{56}\text{N}_4\text{O}_7$  669.42218 [ $\text{M}+\text{H}^+$ ] $^+$ ; found 669.42216. **44b**:  $^1\text{H}$  NMR (400 MHz,  $\text{CDCl}_3$ )  $\delta$  7.52 (s, 1H), 7.17-7.09 (m, 2H), 6.87-6.74 (m, 3H), 6.24 (d,  $J = 7.5$  Hz, 1H), 4.58-4.50 (m, 2H), 4.44-4.37 (m, 1H), 3.77-3.74 (m, 7H), 3.25 (d,  $J = 5.0$  Hz, 1H), 3.14-2.80 (m, 5H), 2.55 (s, 4H), 1.72-1.62 (m, 8H), 1.50 (s, 4H), 1.37 (d,  $J = 7.1$  Hz, 3H), 1.24-0.79 (m, 14H).  $^{13}\text{C}$  NMR (100 MHz,  $\text{CDCl}_3$ )  $\delta$  208.28, 171.92, 170.73, 158.69, 130.54, 128.36, 114.10, 59.17, 55.33, 54.41, 53.74, 52.52, 49.92, 43.35, 43.29, 38.69, 36.85, 34.80, 34.25, 32.32, 30.36, 30.32, 29.88, 29.68, 26.96, 17.69, 16.86. LC-MS (linear gradient 10  $\rightarrow$  90% MeCN/ $\text{H}_2\text{O}$ , 0.1% TFA, 12.5 min): Rt (min): 7.47 (ESI-MS (m/z): 669.40, ( $\text{M}+\text{H}^+$ )). HRMS calculated for  $\text{C}_{37}\text{H}_{56}\text{N}_4\text{O}_7$  669.42218 [ $\text{M}+\text{H}^+$ ] $^+$ ; found 669.42209.

Morp-Ala-Tyr(Me)-NorAla-EK TFA salt (**45**). The corresponding warhead (Boc-NorAla-EK) was deprotected according to general procedure B, followed by azide coupling using the general procedure D on a 50  $\mu\text{mol}$  scale. Purification by HPLC (30%-45% MeCN-H<sub>2</sub>O) yielded the title compound (6.6 mg, 9.3  $\mu\text{mol}$ , 19%). <sup>1</sup>H NMR (600 MHz, MeOD)  $\delta$  7.17-7.08 (m, 2H), 6.87-6.78 (m, 2H), 4.65 (s, 1H), 4.62-4.50 (m, 1H), 4.50-4.34 (m, 2H), 3.77 (s, 3H), 3.74-3.70 (m, 4H), 3.23-3.21 (m, 1H), 3.10-3.01 (m, 2H), 3.01-2.91 (m, 2H), 2.84-2.80 (m, 1H), 2.52-2.47 (m, 4H), 2.26-2.01 (m, 2H), 1.99-1.63 (m, 2H), 1.58-1.28 (m, 12H), 1.28-1.06 (m, 3H). <sup>13</sup>C NMR (150 MHz, MeOD)  $\delta$  209.15, 174.19, 173.27, 172.04, 159.94, 131.41, 130.00, 114.75, 67.86, 62.40, 60.01, 54.70, 53.01, 52.90, 52.32, 52.25, 51.15, 49.69, 49.64, 43.25, 42.03, 41.21, 40.99, 40.75, 40.19, 39.97, 39.64, 38.63, 38.43, 38.36, 38.05, 38.03, 37.84, 37.72, 37.12, 36.22, 35.96, 35.20, 34.40, 31.02, 30.78, 29.70, 29.57, 23.61, 22.95, 18.65, 16.89. LC-MS (linear gradient 10  $\rightarrow$  90% MeCN/H<sub>2</sub>O, 0.1% TFA, 12.5 min): Rt (min): 5.96 (ESI-MS (m/z): 599.40, (M+H<sup>+</sup>)). HRMS calculated for C<sub>32</sub>H<sub>46</sub>N<sub>4</sub>O<sub>7</sub> 599.34393 [M+H]<sup>+</sup>; found 599.34371.

N<sub>3</sub>Phe-Phe(4-CH<sub>2</sub>NH<sub>2</sub>)-Leu-Chg-EK (**46**). This compound was prepared according to the general procedure A on a 50  $\mu\text{mol}$  scale, followed by the removal of the Boc protecting group using the general procedure D. Purification by HPLC (40%-50% MeCN-H<sub>2</sub>O) yielded the title compound (7.8 mg, 10.0  $\mu\text{mol}$ , 20%). <sup>1</sup>H NMR (850 MHz, MeOD)  $\delta$  8.28 (d, J = 7.7 Hz, 1H), 7.37 (d, J = 8.1 Hz, 2H), 7.33-7.28 (m, 4H), 7.27-7.23 (m, 3H), 4.75-4.62 (m, 1H), 4.47-4.43 (m, 2H), 4.09 (s, 2H), 4.05-4.01 (m, 1H), 3.28 (d, J = 5.2 Hz, 1H), 3.18-3.11 (m, 2H), 2.93 (d, J = 5.2 Hz, 1H), 2.92-2.84 (m, 2H), 1.82-1.77 (m, 3H), 1.74-1.64 (m, 3H), 1.57-1.51 (m, 3H), 1.47 (s, 3H), 1.34-1.21 (m, 4H), 1.11-1.06 (m, 1H), 0.98-0.97 (m, 3H), 0.94-0.93 (m, 3H). <sup>13</sup>C NMR (213 MHz, MeOD)  $\delta$  210.58, 174.46, 172.65, 171.36, 139.48, 137.85, 132.86, 131.27, 130.35, 130.02, 129.63, 128.09, 65.45, 60.51, 56.77, 55.26, 52.93, 52.37, 44.06, 41.88, 41.47, 38.85, 38.75, 30.97, 29.82, 27.28, 27.16, 27.13, 25.82, 23.39, 22.11, 16.45. LC-MS (linear gradient 10  $\rightarrow$  90% MeCN/H<sub>2</sub>O, 0.1% TFA, 12.5 min): Rt (min): 6.73 (ESI-MS (m/z): 660.33, (M+H<sup>+</sup>)). HRMS calculated for C<sub>36</sub>H<sub>49</sub>N<sub>7</sub>O<sub>5</sub> 660.38679 [M+H]<sup>+</sup>; found 660.38700.

N<sub>3</sub>Phe-Phe(4-CH<sub>2</sub>NH<sub>2</sub>)-Leu-HomoCha-EK (**47**). This compound was prepared according to the general procedure A on a 50  $\mu\text{mol}$  scale, followed by the removal of the Boc protecting group using the general

procedure D. Purification by HPLC (45%-55% MeCN-H<sub>2</sub>O) yielded the title compound (8.1 mg, 10.1 μmol, 20%). <sup>1</sup>H NMR (850 MHz, MeOD) δ 7.38-7.36 (m, 2H), 7.33-7.28 (m, 4H), 7.27-7.18 (m, 3H), 4.73-4.67 (m, 1H), 4.47-4.38 (m, 2H), 4.09 (s, 2H), 4.04-4.00 (m, 1H), 3.27-3.25 (m, 1H), 3.19-3.09 (m, 2H), 2.96 (d, J = 5.2 Hz, 1H), 2.92-2.83 (m, 2H), 1.86-1.80 (m, 2H), 1.76-1.65 (m, 5H), 1.60-1.54 (m, 2H), 1.50-1.45 (m, 4H), 1.39-1.33 (m, 1H), 1.29-1.15 (m, 5H), 1.02-0.88 (m, 8H). <sup>13</sup>C NMR (213 MHz, MeOD) δ 209.37, 174.62, 172.65, 171.39, 139.54, 137.86, 132.84, 131.26, 130.35, 130.02, 129.63, 128.09, 65.43, 60.24, 55.33, 53.71, 53.03, 52.83, 44.06, 41.99, 38.85, 38.57, 34.81, 34.63, 34.04, 28.83, 27.71, 27.45, 27.38, 25.79, 23.42, 22.11, 16.99. LC-MS (linear gradient 10 → 90% MeCN/H<sub>2</sub>O, 0.1% TFA, 12.5 min): Rt (min): 7.25 (ESI-MS (m/z): 688.33, (M+H<sup>+</sup>)). HRMS calculated for C<sub>38</sub>H<sub>53</sub>N<sub>7</sub>O<sub>5</sub> 688.41809[M+H]<sup>+</sup>; found 688.41829.

N<sub>3</sub>Phe-Phe(4-CH<sub>2</sub>NH<sub>2</sub>)-Leu-Cha(4-Me)-EK (**48**). This compound was prepared according to the general procedure D on a 50 μmol scale, followed by the removal of the Boc protecting group using the general procedure B. Purification by HPLC (45%-55% MeCN-H<sub>2</sub>O) yielded the title compound (8.7 mg, 10.8 μmol, 22%). <sup>1</sup>H NMR (850 MHz, MeOD) δ 7.39-7.19 (m, 9H), 4.72-4.66 (m, 1H), 4.58-4.51 (m, 1H), 4.46-4.43 (m, 1H), 4.08 (s, 2H), 4.05-3.98 (m, 1H), 3.27-3.26 (m, 1H), 3.20-3.08 (m, 2H), 2.97-2.95 (m, 1H), 2.91-2.80 (m, 2H), 1.90-1.84 (m, 1H), 1.75-1.64 (m, 3H), 1.64-1.23 (m, 14H), 1.01-0.93 (m, 8H), 0.88-0.87 (m, 1H). <sup>13</sup>C NMR (213 MHz, MeOD) δ 209.61, 174.69, 174.58, 172.66, 172.65, 171.60, 171.39, 139.56, 137.86, 132.84, 131.25, 131.20, 130.34, 130.32, 130.03, 130.01, 129.63, 129.61, 128.08, 65.45, 60.25, 60.18, 55.41, 55.33, 53.12, 53.08, 52.86, 51.73, 51.43, 44.06, 42.03, 41.98, 38.85, 38.77, 38.54, 36.37, 36.15, 35.46, 35.08, 33.94, 32.93, 31.35, 31.13, 28.00, 25.79, 23.43, 23.04, 22.11, 17.08. LC-MS (linear gradient 10 → 90% MeCN/H<sub>2</sub>O, 0.1% TFA, 12.5 min): Rt (min): 7.17 (ESI-MS (m/z): 688.40, (M+H<sup>+</sup>)). HRMS calculated for C<sub>38</sub>H<sub>53</sub>N<sub>7</sub>O<sub>5</sub> 688.41809 [M+H]<sup>+</sup>; found 688.41844.

N<sub>3</sub>Phe-Phe(4-CH<sub>2</sub>NH<sub>2</sub>)-Leu-Cha(4-OMe)-EK (**49**). This compound was prepared according to the general procedure D on a 50 μmol scale, followed by the removal of the Boc protecting group using the general procedure B. Purification by HPLC (40%-50% MeCN-H<sub>2</sub>O) yielded the title compound (8.6 mg, 10.5 μmol, 21%). <sup>1</sup>H NMR (850 MHz, MeOD) δ 7.39-7.18 (m, 9H), 4.71-4.67 (m, 1H), 4.57-4.55

(m, 1H), 4.45-4.42 (m, 1H), 4.09 (s, 2H), 4.04-4.00 (m, 1H), 3.44-3.42 (m, 1H), 3.32 (s, 3H), 3.27 (d, J = 5.2 Hz, 1H), 3.19-3.15 (m, 1H), 3.13-3.10 (m, 1H), 2.96 (d, J = 5.2 Hz, 1H), 2.91-2.83 (m, 2H), 1.87 (t, J = 14.0 Hz, 2H), 1.74-1.42 (m, 12H), 1.40-1.28 (m, 3H), 1.02-0.94 (m, 6H). <sup>13</sup>C NMR (213 MHz, MeOD) δ 209.57, 174.64, 174.63, 172.66, 172.64, 171.60, 171.38, 139.65, 139.56, 137.86, 137.74, 136.11, 135.86, 132.85, 131.25, 131.20, 130.35, 130.32, 130.04, 130.02, 129.63, 129.61, 128.09, 76.96, 65.46, 65.39, 60.21, 55.80, 55.42, 55.33, 53.09, 52.91, 51.39, 44.05, 44.02, 42.02, 41.99, 39.05, 38.86, 38.75, 38.48, 29.87, 29.60, 29.05, 26.77, 26.39, 25.79, 23.43, 22.11, 17.07. LC-MS (linear gradient 10 → 90% MeCN/H<sub>2</sub>O, 0.1% TFA, 12.5 min): Rt (min): 6.43 (ESI-MS (m/z): 704.33, (M+H<sup>+</sup>)). HRMS calculated for C<sub>38</sub>H<sub>53</sub>N<sub>7</sub>O<sub>6</sub> 704.41301 [M+H]<sup>+</sup>; found 704.41334.

N<sub>3</sub>Phe-Phe(4-CH<sub>2</sub>NH<sub>2</sub>)-Leu-1-DecAla-EK (**50**). This compound was prepared according to the general procedure D on a 50 μmol scale, followed by the removal of the Boc protecting group using the general procedure B. Purification by HPLC (55%-70% MeCN-H<sub>2</sub>O) yielded the title compound (4.1 mg, 4.9 μmol, 10%). <sup>1</sup>H NMR (850 MHz, MeOD) δ 7.39-7.23 (m, 9H), 4.71-4.69 (m, 1H), 4.67-4.61 (m, 1H), 4.56-4.51 (m, 1H), 4.47-4.43 (m, 1H), 4.09 (s, 2H), 4.03-4.00 (m, 2H), 3.27-3.24 (m, 1H), 3.20-3.16 (m, 1H), 3.12-3.10 (m, 1H), 2.97-2.94 (m, 1H), 2.91-2.88 (m, 1H), 2.86-2.82 (m, 1H), 1.81-1.17 (m, 25H), 1.01-0.99 (m, 3H), 0.96-0.94 (m, 3H). <sup>13</sup>C NMR (213 MHz, MeOD) δ 210.03, 209.68, 174.75, 174.63, 172.64, 171.39, 162.70, 162.53, 139.62, 137.88, 132.85, 131.25, 130.34, 130.03, 129.63, 128.09, 65.45, 60.16, 55.35, 53.09, 52.89, 51.69, 51.03, 49.37, 44.45, 44.07, 43.20, 42.02, 41.98, 39.86, 39.49, 39.13, 36.11, 35.69, 35.50, 34.63, 33.74, 32.47, 31.11, 28.01, 27.90, 27.73, 27.55, 27.04, 25.81, 23.42, 22.33, 22.15, 21.25, 17.06. LC-MS (linear gradient 10 → 90% MeCN/H<sub>2</sub>O, 0.1% TFA, 12.5 min): Rt (min): 7.65 (ESI-MS (m/z): 728.33, (M+H<sup>+</sup>)). HRMS calculated for C<sub>41</sub>H<sub>57</sub>N<sub>7</sub>O<sub>5</sub> 728.44939 [M+H]<sup>+</sup>; found 728.44986.

N<sub>3</sub>Phe-Phe(4-CH<sub>2</sub>NH<sub>2</sub>)-Leu-2-DecAla-EK (**51**). This compound was prepared according to the general procedure D on a 50 μmol scale, followed by the removal of the Boc protecting group using the general procedure B. Purification by HPLC (55%-70% MeCN-H<sub>2</sub>O) yielded the title compound (7.6 mg, 9.0 μmol, 18%). <sup>1</sup>H NMR (850 MHz, MeOD) δ 7.41-7.18 (m, 9H), 4.73-4.67 (m, 1H), 4.62-4.54 (m, 1H),

4.47-4.40 (m, 1H), 4.09 (s, 2H), 4.04-4.01 (m, 1H), 3.29-3.08 (m, 3H), 2.98-2.81 (m, 3H), 1.83-1.03 (m, 25H), 1.03-0.89 (m, 6H). <sup>13</sup>C NMR (213 MHz, MeOD) δ 209.69, 209.64, 174.57, 172.70, 172.65, 171.40, 162.65, 162.48, 139.62, 139.58, 137.87, 132.85, 131.25, 131.19, 130.34, 130.33, 130.03, 130.02, 129.63, 129.61, 128.08, 65.44, 65.39, 60.24, 60.20, 55.43, 55.36, 55.34, 53.11, 53.10, 52.88, 51.39, 51.30, 44.06, 44.03, 41.98, 40.40, 39.06, 38.86, 38.82, 38.79, 38.69, 37.51, 37.30, 37.26, 37.21, 36.48, 36.45, 34.45, 33.63, 33.48, 33.44, 33.26, 32.32, 29.47, 28.15, 27.39, 26.86, 25.80, 23.41, 23.40, 22.17, 22.14, 22.01, 21.98, 17.10. LC-MS (linear gradient 10 → 90% MeCN/H<sub>2</sub>O, 0.1% TFA, 12.5 min): Rt (min): 7.68 (ESI-MS (m/z): 728.33, (M+H<sup>+</sup>)). HRMS calculated for C<sub>41</sub>H<sub>57</sub>N<sub>7</sub>O<sub>5</sub> 728.44939 [M+H]<sup>+</sup>; found 728.44991.

N<sub>3</sub>Phe-Phe(4-CH<sub>2</sub>NH<sub>2</sub>)-Leu-BiCha-EK (**52**). This compound was prepared according to the general procedure D on a 50 μmol scale, followed by the removal of the Boc protecting group using the general procedure B. Purification by HPLC (60%-70% MeCN-H<sub>2</sub>O) yielded the title compound (3.1 mg, 3.6 μmol, 7%). <sup>1</sup>H NMR (600 MHz, MeOD) δ 7.41-7.15 (m, 9H), 4.71-4.67 (m, 1H), 4.52-4.49 (m, 1H), 4.46-4.43 (m, 1H), 4.07 (s, 2H), 4.04-4.00 (m, 1H), 3.28-3.25 (m, 1H), 3.19-3.10 (m, 2H), 2.98-2.95 (m, 1H), 2.93-2.79 (m, 2H), 1.95-1.89 (m, 1H), 1.82-1.33 (m, 20H), 1.31-1.09 (m, 6H), 1.02-0.91 (m, 8H). <sup>13</sup>C NMR (150 MHz, MeOD) δ 209.62, 174.71, 172.66, 171.41, 139.47, 137.86, 133.18, 131.27, 131.25, 130.35, 130.33, 129.97, 129.64, 128.10, 65.46, 60.30, 60.19, 55.34, 53.17, 52.86, 51.44, 49.57, 48.57, 44.73, 44.17, 42.02, 41.93, 38.86, 38.77, 31.91, 31.66, 31.64, 31.41, 28.63, 27.95, 27.88, 26.56, 26.08, 25.80, 23.44, 22.12, 17.11. LC-MS (linear gradient 10 → 90% MeCN/H<sub>2</sub>O, 0.1% TFA, 12.5 min): Rt (min): 8.24 (ESI-MS (m/z): 756.33, (M+H<sup>+</sup>)). HRMS calculated for C<sub>43</sub>H<sub>61</sub>N<sub>7</sub>O<sub>5</sub> 756.48069 [M+H]<sup>+</sup>; found 756.48145.

N<sub>3</sub>Phe-Phe(4-CH<sub>2</sub>NH<sub>2</sub>)-Leu-NorAla-EK (**53**). This compound was prepared according to the general procedure D on a 50 μmol scale, followed by the removal of the Boc protecting group using the general procedure B. Purification by HPLC (40%-50% MeCN-H<sub>2</sub>O) yielded the title compound (3.9 mg, 4.9 μmol, 10%). <sup>1</sup>H NMR (850 MHz, MeOD) δ 7.41-7.17 (m, 9H), 4.74-4.64 (m, 2H), 4.47-4.38 (m, 2H), 4.09 (s, 2H), 4.03-3.99 (m, 1H), 3.28-3.25 (m, 1H), 3.19-3.15 (m, 1H), 3.12-3.10 (m, 1H), 2.98-2.94 (m,

1H), 2.91-2.82 (m, 2H), 2.26-2.12 (m, 3H), 1.85-1.46 (m, 12H), 1.42-1.23 (m, 4H), 1.03-0.90 (m, 6H). <sup>13</sup>C NMR (213 MHz, MeOD) δ 209.66, 209.34, 174.60, 174.52, 172.66, 171.39, 139.69, 139.59, 137.86, 137.74, 132.84, 131.26, 131.21, 130.34, 130.32, 130.02, 129.63, 128.09, 65.44, 60.33, 60.26, 55.34, 55.30, 53.12, 53.01, 52.95, 52.87, 51.73, 44.07, 43.31, 42.11, 42.02, 41.98, 41.15, 41.02, 40.79, 40.14, 40.08, 39.67, 38.85, 38.80, 38.50, 38.46, 38.23, 38.08, 38.06, 37.97, 37.83, 37.80, 37.06, 36.22, 35.98, 34.05, 31.04, 30.99, 30.95, 30.82, 29.73, 29.60, 25.80, 23.64, 23.41, 22.98, 22.12, 17.06. LC-MS (linear gradient 10 → 90% MeCN/H<sub>2</sub>O, 0.1% TFA, 12.5 min): Rt (min): 6.98 (ESI-MS (m/z): 686.27, (M+H<sup>+</sup>)). HRMS calculated for C<sub>38</sub>H<sub>51</sub>N<sub>7</sub>O<sub>5</sub> 686.40244 [M+H]<sup>+</sup>; found 686.40278.

Boc-Tyr(O-C<sub>2</sub>H<sub>4</sub>N<sub>3</sub>)-OMe (**90**). Boc-Tyr-OMe **88** (442 mg, 1.5 mmol) was dissolved in anhydrous DMF, followed by the addition of compound **89** (433 mg, 1.8 mmol, 1.2 eq.) and K<sub>2</sub>CO<sub>3</sub> (830 mg, 6 mmol, 4.0 eq.). The reaction mixture was stirred for 48h at 80 °C when TLC analysis showed formation of the product. The reaction mixture was concentrated *in vacuo* and redissolved in EtOAc and washed with H<sub>2</sub>O (3x) and brine, dried over MgSO<sub>4</sub> and concentrated *in vacuo*. Purification by silica gel column chromatography (4% EtOAc/pentane → 20% EtOAc/pentane) yielded the title compound (437 mg, 1.2 mmol, 80%). <sup>1</sup>H NMR (400 MHz, CDCl<sub>3</sub>) δ 7.05 (d, J = 8.1 Hz, 2H), 6.84 (d, J = 7.8 Hz, 2H), 5.19 (d, J = 7.3 Hz, 1H), 4.52 (d, J = 6.7 Hz, 1H), 4.16-4.00 (m, 2H), 3.69 (s, 3H), 3.53 (d, J = 4.3 Hz, 2H), 3.16-2.86 (m, 2H), 1.41 (s, 9H). <sup>13</sup>C NMR (100 MHz, CDCl<sub>3</sub>) δ 172.18, 171.52, 157.10, 154.96, 130.18, 130.09, 128.64, 128.48, 114.42, 79.56, 77.48, 77.16, 76.84, 66.77, 63.93, 63.50, 61.10, 60.15, 54.43, 53.22, 51.95, 49.91, 49.35, 37.69, 37.16, 29.45, 28.08. HRMS calculated for C<sub>17</sub>H<sub>24</sub>N<sub>4</sub>O<sub>5</sub> 365.18195 [M+H]<sup>+</sup>; found 365.18204.

Boc-Ala-Tyr(O-C<sub>2</sub>H<sub>4</sub>N<sub>3</sub>)-OMe (**91**). Boc protecting group of Compound **90** (302 mg, 0.83 mmol) was removed according to general procedure B, followed by the peptide coupling with Boc-Ala-OH according to general procedure A. Purification by flash column chromatography (5% EtOAc/pentane → 50% EtOAc/pentane) yielded the titled compound (336 mg, 0.77 mmol, 93%). <sup>1</sup>H NMR (400 MHz, CDCl<sub>3</sub>) δ 7.04 (d, J = 8.4 Hz, 2H), 6.96 (d, J = 6.4 Hz, 1H), 6.82 (d, J = 8.4 Hz, 2H), 5.45 (d, J = 6.3 Hz, 1H), 4.79 (d, J = 6.5 Hz, 1H), 4.22 (s, 1H), 4.09 (t, J = 4.8 Hz, 2H), 3.68 (s, 3H), 3.55 (d, J = 4.8 Hz,



2H), 3.06 (td,  $J = 15.9, 14.9, 5.9$  Hz, 2H), 1.43 (s, 9H), 1.37-1.22 (m, 4H).  $^{13}\text{C}$  NMR (100 MHz,  $\text{CDCl}_3$ )  $\delta$  172.47, 171.68, 157.12, 155.24, 130.23, 128.45, 114.41, 79.65, 77.48, 77.16, 76.84, 66.74, 53.27, 52.11, 49.97, 36.83, 29.49, 28.15, 18.25. HRMS calculated for  $\text{C}_{20}\text{H}_{29}\text{N}_5\text{O}_6$  436.21906  $[\text{M}+\text{H}]^+$ ; found 436.21908.

Morp-Ala-Tyr(O- $\text{C}_2\text{H}_4\text{N}_3$ )-OMe (**92**). The Boc protecting group in compound **91** (336 mg, 0.77 mmol) was removed according to general procedure B, followed by peptide coupling with 2-morpholinoacetic acid according to general procedure A. Purification by silica gel column chromatography (0% MeOH/DCM  $\rightarrow$  3% MeOH/DCM) yielded the title compound (116 mg, 0.25 mmol, 32%).  $^1\text{H}$  NMR (400 MHz,  $\text{CDCl}_3$ )  $\delta$  7.59 (d,  $J = 8.2$  Hz, 1H), 7.12-6.99 (m, 2H), 6.92 (d,  $J = 7.8$  Hz, 1H), 6.88-6.74 (m, 2H), 4.86-4.71 (m, 1H), 4.56 (p,  $J = 7.1$  Hz, 1H), 4.10 (q,  $J = 5.0$  Hz, 2H), 3.72 (s, 3H), 3.72-3.65 (m, 4H), 3.58 (q,  $J = 4.6$  Hz, 2H), 3.10 (dd,  $J = 13.9, 5.6$  Hz, 1H), 3.04-2.97 (m, 2H), 2.97-2.86 (m, 1H), 2.49 (t,  $J = 4.6$  Hz, 4H), 1.37 (d,  $J = 7.0$  Hz, 3H), 1.21 (s, 1H).  $^{13}\text{C}$  NMR (100 MHz,  $\text{CDCl}_3$ )  $\delta$  171.88, 171.80, 171.77, 169.84, 169.81, 157.30, 157.25, 130.37, 130.32, 128.58, 128.52, 114.55, 77.48, 77.16, 76.84, 66.93, 66.90, 66.87, 61.74, 61.70, 53.71, 53.49, 52.37, 50.12, 48.05, 36.96, 36.80, 29.65, 18.36. HRMS calculated for  $\text{C}_{21}\text{H}_{30}\text{N}_6\text{O}_6$  463.22966  $[\text{M}+\text{H}]^+$ ; found 463.22974.

Morph-Ala-Tyr(O- $\text{C}_2\text{H}_4\text{N}_3$ )- $\text{N}_2\text{H}_4$  (**93**). Compound **92** (116 mg, 0.25 mmol) was dissolved in MeOH, followed by addition of hydrazine monohydrate (0.36 ml, 7.5 mmol, 30 eq.). The reaction mixture was stirred overnight at room temperature and then refluxed at 70 °C until TLC analysis showed complete conversion of the starting material. The reaction mixture was concentrated in vacuo and then co-evaporated with toluene (3x) which yielded the title compound in quantitative yield and used without further purification.

Morp-Ala-Tyr(O- $\text{C}_2\text{H}_4\text{N}_3$ )-1-DecAla-EK (**95**). H-1-DecAla-EK (**94**) was prepared according to literature procedure,<sup>10</sup> and subjected to azide coupling to **93** using the general procedure D on a 66  $\mu\text{mol}$  scale. Purification by flash column chromatography (0% MeOH/DCM  $\rightarrow$  3% MeOH/DCM) yielded the title compound (30 mg, 37  $\mu\text{mol}$ , 56%).  $^1\text{H}$  NMR (600 MHz, MeOD)  $\delta$  7.23 (d,  $J = 8.6$  Hz, 2H), 6.92

(d, J = 8.6 Hz, 2H), 4.74-4.63 (m, 1H), 4.63-4.53 (m, 1H), 4.44 (q, J = 7.1 Hz, 1H), 4.21 (t, J = 4.8 Hz, 3H), 4.11-3.84 (m, 7H), 3.66 (dd, J = 5.6, 3.8 Hz, 2H), 3.25 (dd, J = 24.5, 5.1 Hz, 2H), 3.12 (dd, J = 14.0, 5.9 Hz, 1H), 3.05-2.96 (m, 1H), 2.91 (ddd, J = 13.5, 8.4, 5.0 Hz, 1H), 2.74 (s, 1H), 2.14-1.81 (m, 3H), 1.77 (dq, J = 19.5, 7.5, 5.4 Hz, 3H), 1.70-1.56 (m, 7H), 1.56-1.51 (m, 5H), 1.51-1.43 (m, 3H), 1.41 (dd, J = 7.2, 3.1 Hz, 4H), 1.38-1.20 (m, 5H), 1.11-0.96 (m, 1H). <sup>13</sup>C NMR (150 MHz, MeOD) δ 209.48, 174.14, 173.36, 173.30, 158.74, 131.57, 130.65, 115.54, 68.43, 64.94, 60.10, 59.93, 58.49, 55.59, 53.96, 52.93, 52.81, 51.38, 50.99, 50.49, 49.43, 49.28, 49.14, 49.00, 48.86, 48.72, 48.58, 44.46, 43.09, 40.39, 39.50, 39.12, 38.26, 36.48, 34.85, 33.85, 33.73, 31.14, 27.99, 27.93, 27.69, 26.75, 26.54, 22.32, 21.22, 18.13, 16.88.

#### List of abbreviations

BODIPY, boron-dipyrromethene, (4,4-difluoro-5,7-dimethyl-4-bora-3a,4a-diaza-s-indacene); DiPEA, N,N-diisopropylethylamine; ek, epoxyketone; EtOAc, ethyl acetate; pent, pentane; DCM, dichloromethane; HCTU, 2-(6-chloro-1H-benzotriazol-1-yl)-1,1,3,3-tetramethyluronium hexafluorophosphate; Phg, phenylglycine; 1-Nal, 1-naphthylalanine; 2-Nal, 2-naphthylalanine; BiPhe, biphenylalanine; Chg, cyclohexylglycine; Cha, cyclohexylalanine; HomoCha, homocyclohexylalanine; 1-DecAla, 1-decahydronaphthalenylalanine; 2-DecAla, 2-decahydronaphthalenylalanine; BiCha, bicyclohexylalanine; NorAla, norbornanealanine; Ala(ada), adamantanealanine; Ala(tBu), t-butylalanine; Pyra, pyrazine-2-carboxyl; Phnico, 6-phenylnicotinyl; Dibenz, 2,5-dichlorobenzyl; Morph, 2-morpholinoacetyl; Methia, 2-methylthiazol-5-carboxyl.

#### References

1. Huber, E. M.; Heinemeyer, W.; Li, X.; Arendt, C. S.; Hochstrasser, M.; Groll, M., A unified mechanism for proteolysis and autocatalytic activation in the 20S proteasome. *Nature communications* 2016, 7, 10900.
2. Huber, E. M.; Heinemeyer, W.; Groll, M., Bortezomib-Resistant Mutant Proteasomes: Structural and Biochemical Evaluation with Carfilzomib and ONX 0914. *Structure* 2015, 23 (2), 407-17.

3. Schrader, J.; Henneberg, F.; Mata, R. A.; Tittmann, K.; Schneider, T. R.; Stark, H.; Bourenkov, G.; Chari, A., The inhibition mechanism of human 20S proteasomes enables next-generation inhibitor design. *Science* 2016, 353 (6299), 594-8.
4. Geurink, P. P.; van der Linden, W. A.; Mirabella, A. C.; Gallastegui, N.; de Bruin, G.; Blom, A. E. M.; Voges, M. J.; Mock, E. D.; Florea, B. I.; van der Marel, G. A.; Driessen, C.; van der Stelt, M.; Groll, M.; Overkleeft, H. S.; Kisselev, A. F., Incorporation of Non-natural Amino Acids Improves Cell Permeability and Potency of Specific Inhibitors of Proteasome Trypsin-like Sites. *Journal of Medicinal Chemistry* 2013, 56 (3), 1262-1275.
5. de Bruin, G.; Huber, E. M.; Xin, B.-T.; van Rooden, E. J.; Al-Ayed, K.; Kim, K.-B.; Kisselev, A. F.; Driessen, C.; van der Stelt, M.; van der Marel, G. A.; Groll, M.; Overkleeft, H. S., Structure-Based Design of  $\beta$ 1i or  $\beta$ 5i Specific Inhibitors of Human Immunoproteasomes. *Journal of Medicinal Chemistry* 2014, 57 (14), 6197-6209.
6. Xin, B.-T.; de Bruin, G.; Huber, E. M.; Besse, A.; Florea, B. I.; Filippov, D. V.; van der Marel, G. A.; Kisselev, A. F.; van der Stelt, M.; Driessen, C.; Groll, M.; Overkleeft, H. S., Structure-Based Design of  $\beta$ 5c Selective Inhibitors of Human Constitutive Proteasomes. *Journal of Medicinal Chemistry* 2016, 59 (15), 7177-7187.
7. Dauben, W. G.; Tweit, R. C.; Mannerskantz, C., Decahydronaphthoic Acids and their Relationship to the Decalols and Decalylamines. I A Stereochemical Study of the Reaction of Nitrous Acid with Decalylamines. *Journal of the American Chemical Society* 1954, 76 (17), 4420-4426.
8. Truong, V. L.; Gauthier, J. Y.; Boyd, M.; Roy, B.; Scheiget, J., Practical and Efficient Route to (S)- $\gamma$ -Fluoroleucine. *Synlett* 2005, 2005 (08), 1279-1280.
9. Gauthier, J. Y.; Chauret, N.; Cromlish, W.; Desmarais, S.; Duong, L. T.; Falgueyret, J.-P.; Kimmel, D. B.; Lamontagne, S.; Léger, S.; LeRiche, T.; Li, C. S.; Massé, F.; McKay, D. J.; Nicoll-Griffith, D. A.; Oballa, R. M.; Palmer, J. T.; Percival, M. D.; Riendeau, D.; Robichaud, J.; Rodan, G. A.; Rodan, S. B.; Seto, C.; Thérien, M.; Truong, V.-L.; Venuti, M. C.; Wesolowski, G.; Young, R. N.; Zamboni, R.; Black, W. C., The discovery of odanacatib (MK-0822), a selective inhibitor of cathepsin K. *Bioorganic & Medicinal Chemistry Letters* 2008, 18 (3), 923-928.

10. Gerjan, d. B.; Tao, X. B.; Marianne, K.; Mario, v. d. S.; A., v. d. M. G.; F., K. A.; Christoph, D.; I., F. B.; S., O. H., A Set of Activity-Based Probes to Visualize Human (Immuno)proteasome Activities. *Angewandte Chemie International Edition* 2016, 55 (13), 4199-4203.

NMR-spectra of compounds **13**, **39**, **68**, **71**, **74**, **77**, **86**, and **87s**.

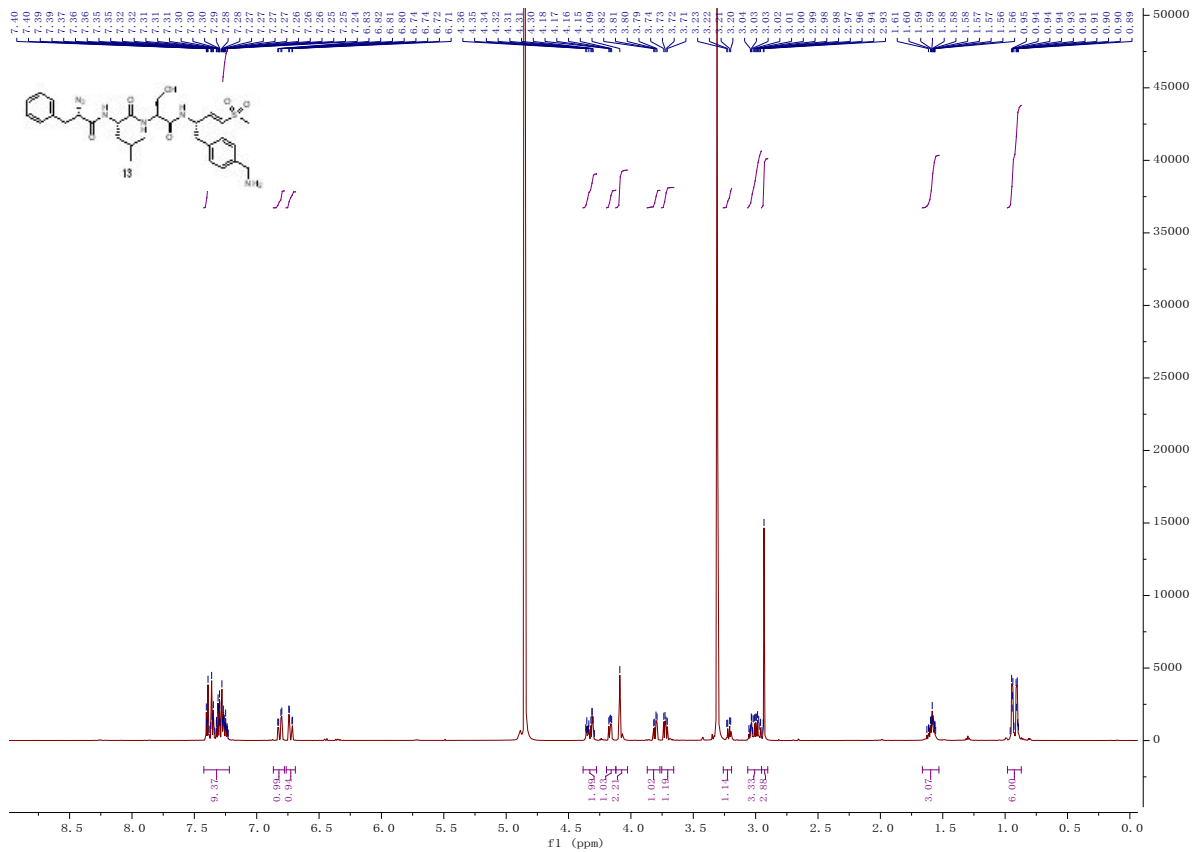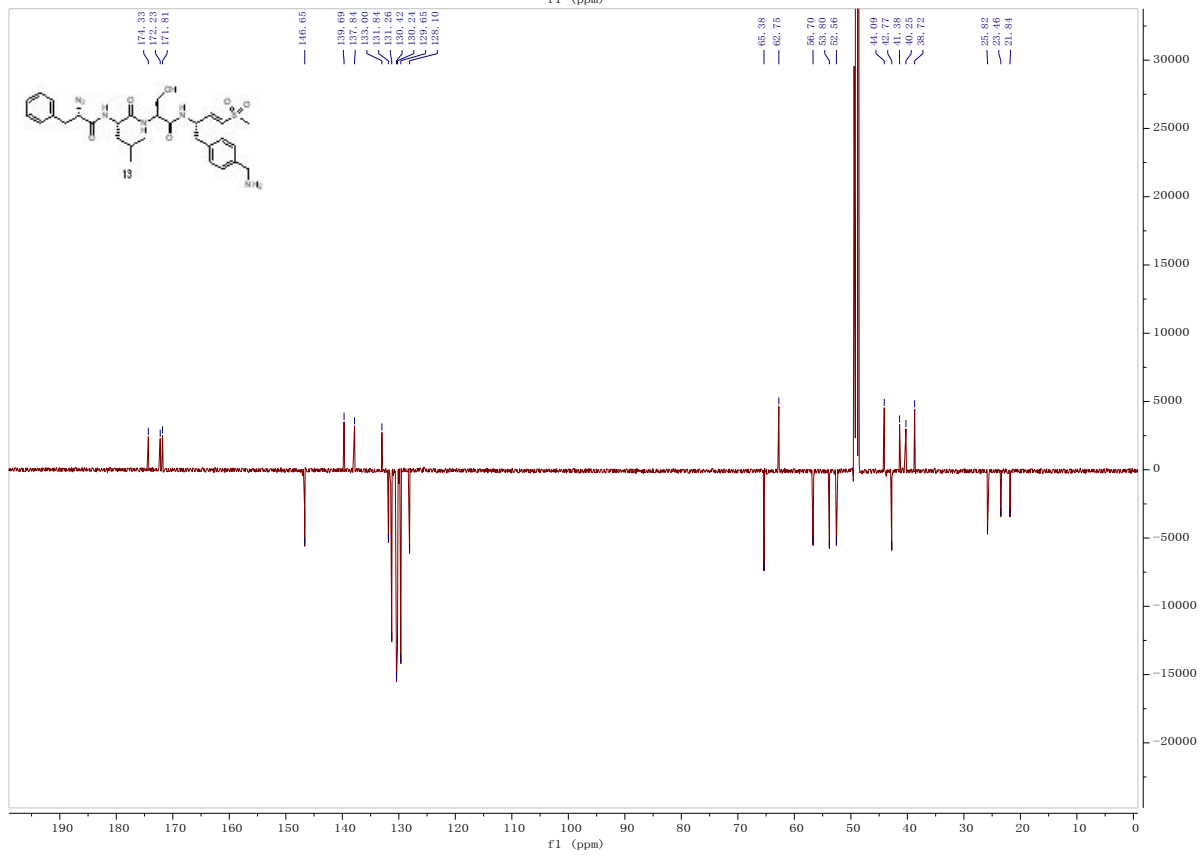



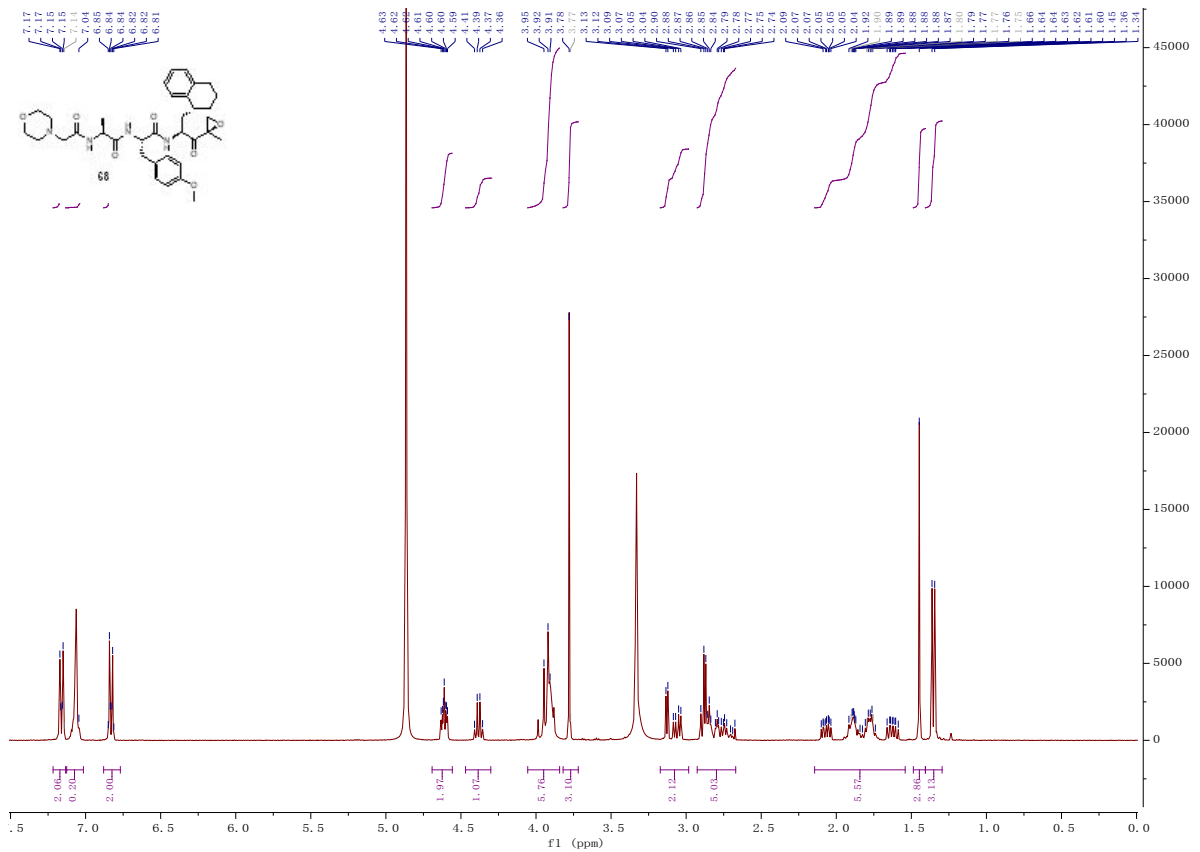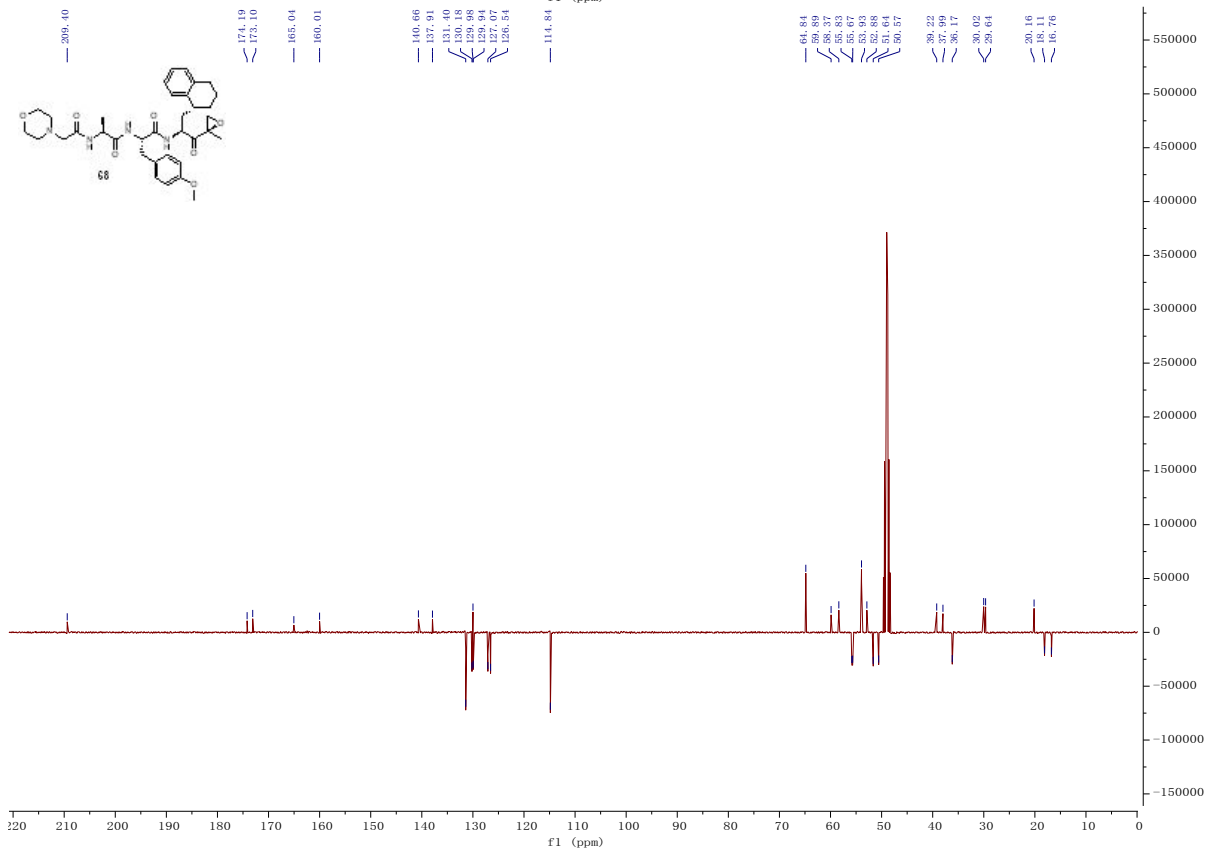





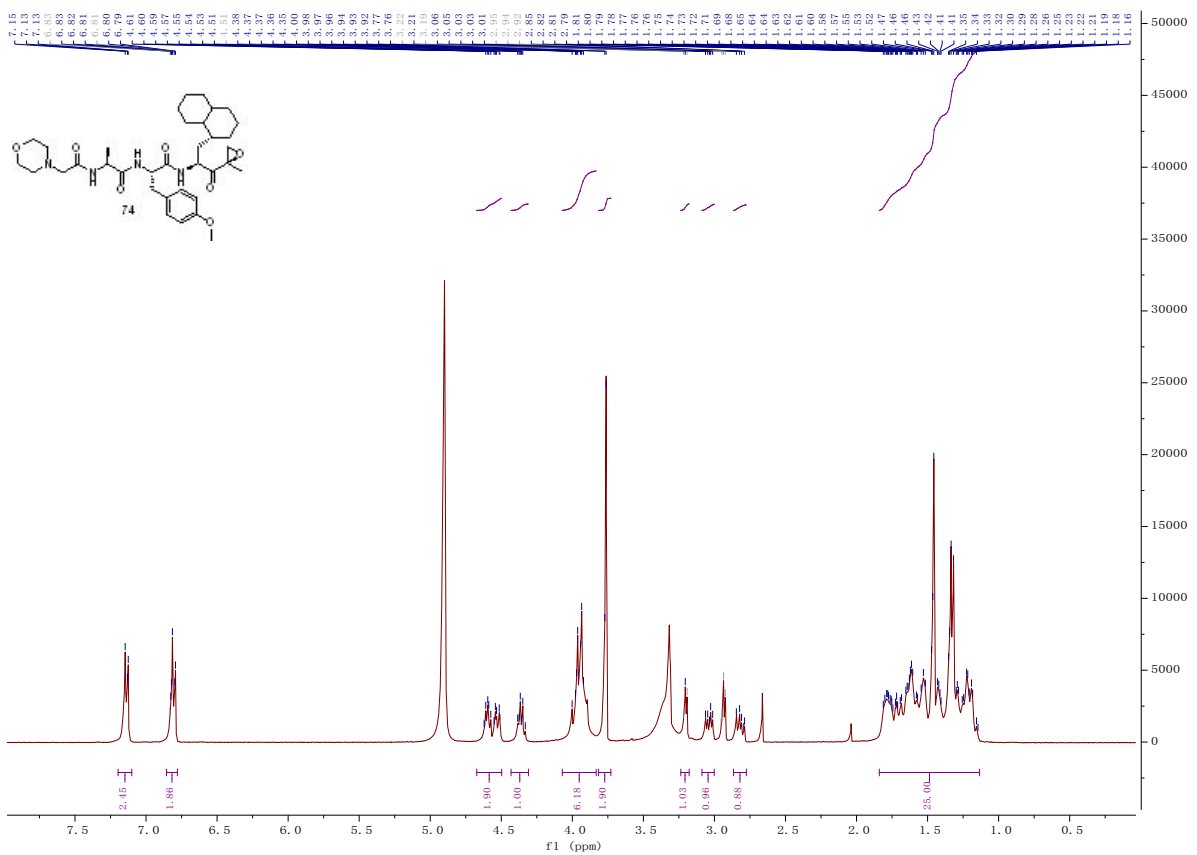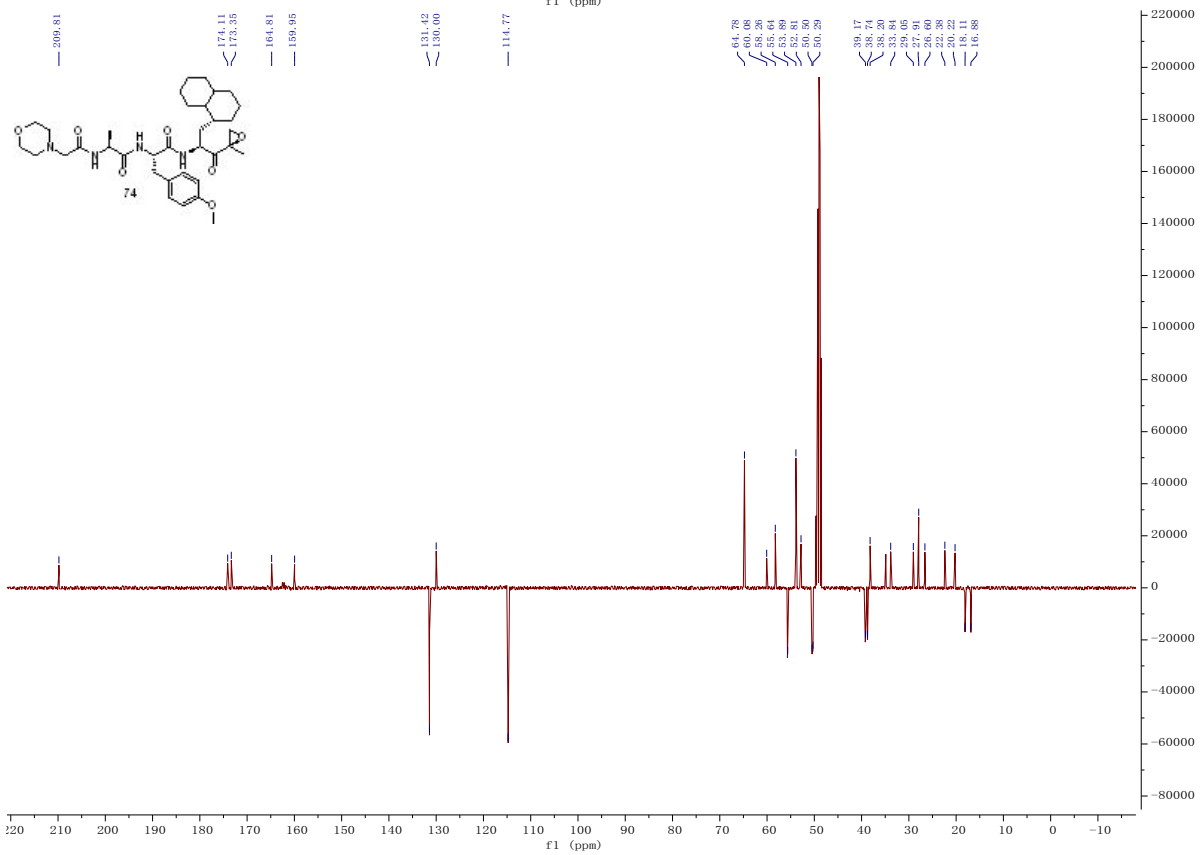

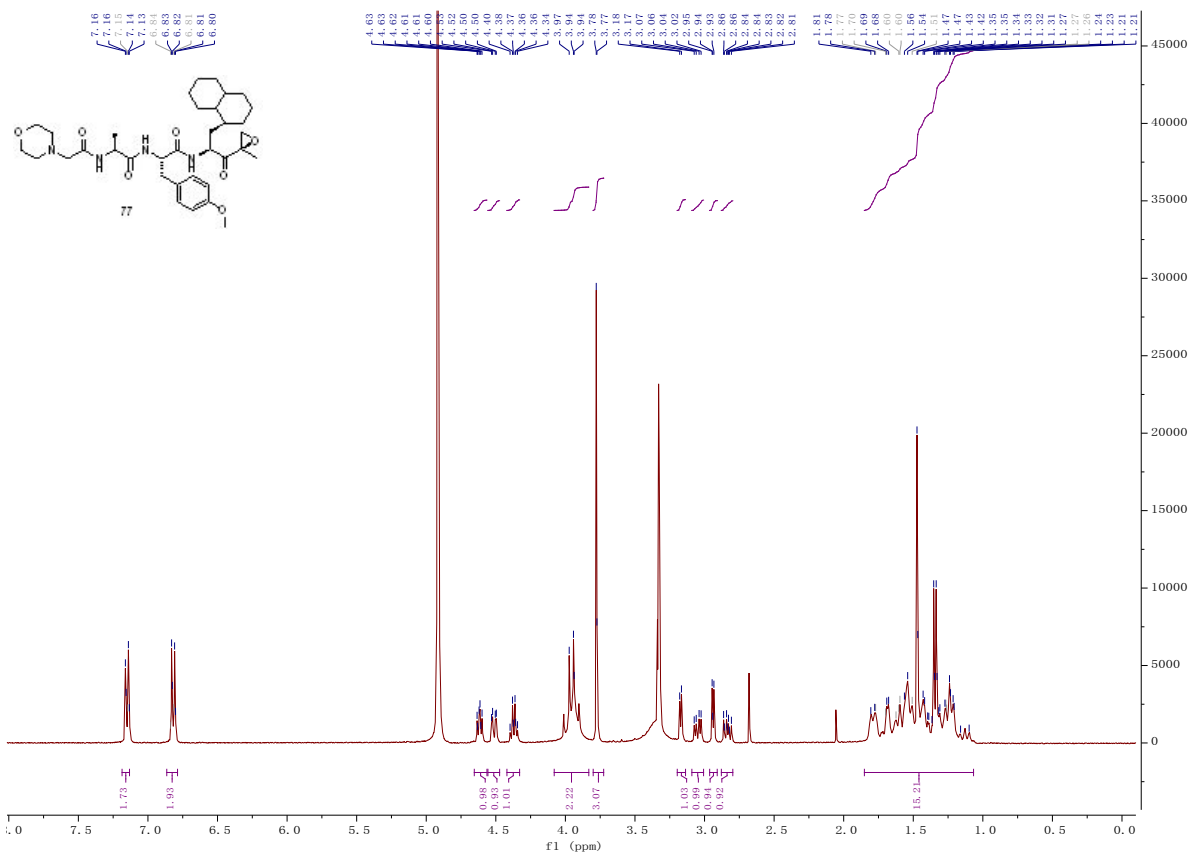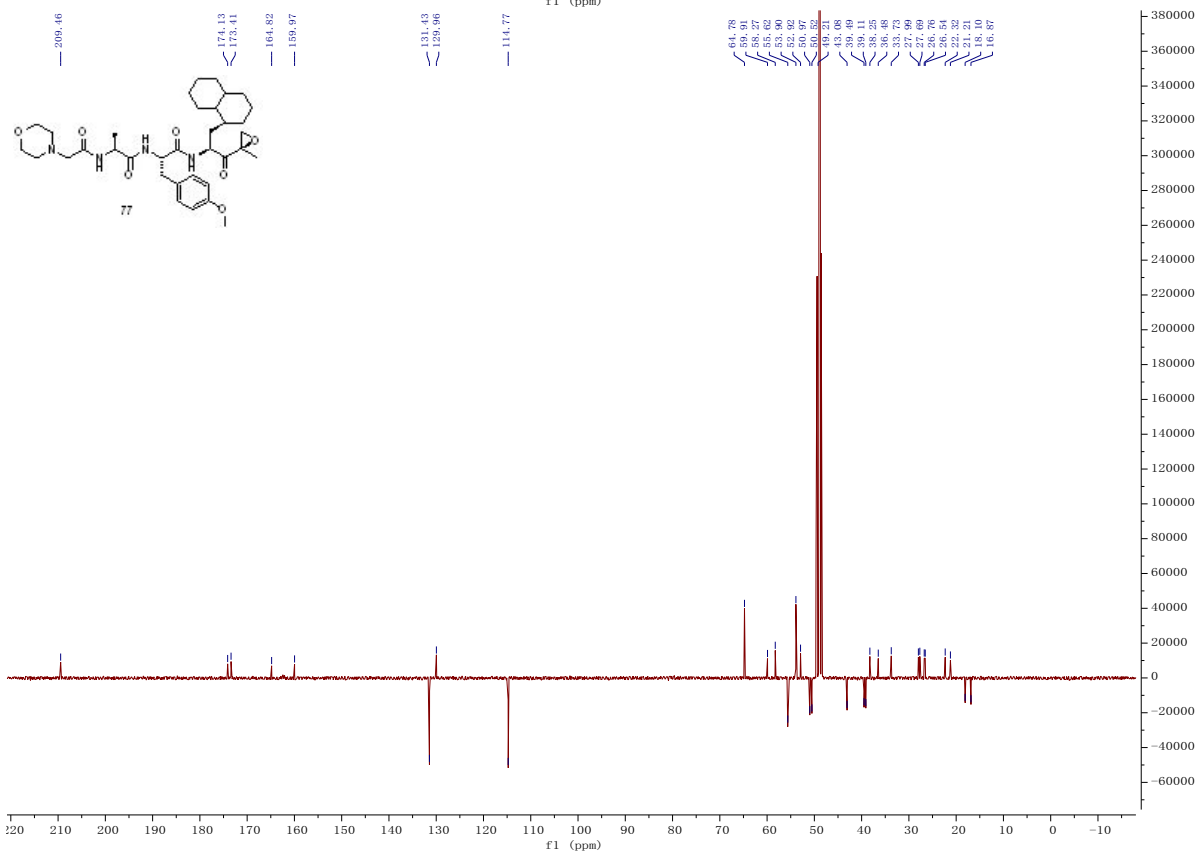

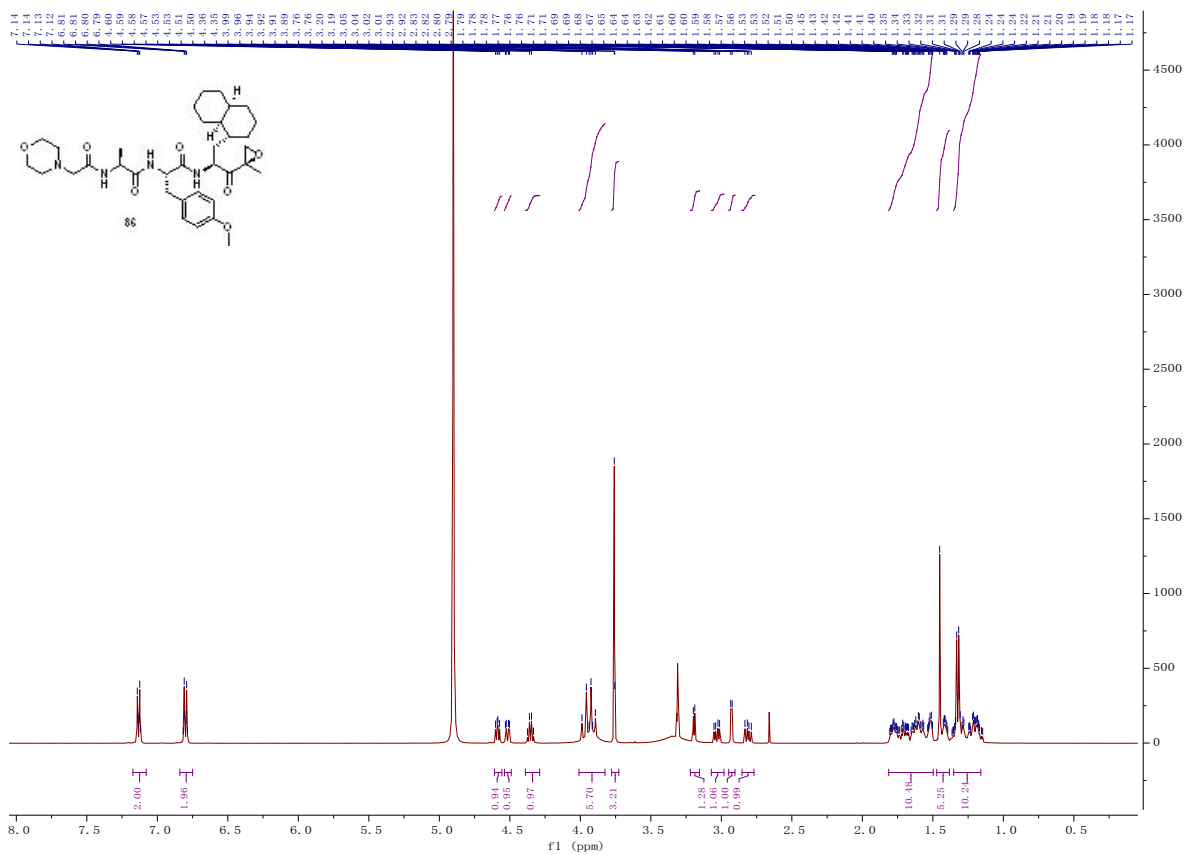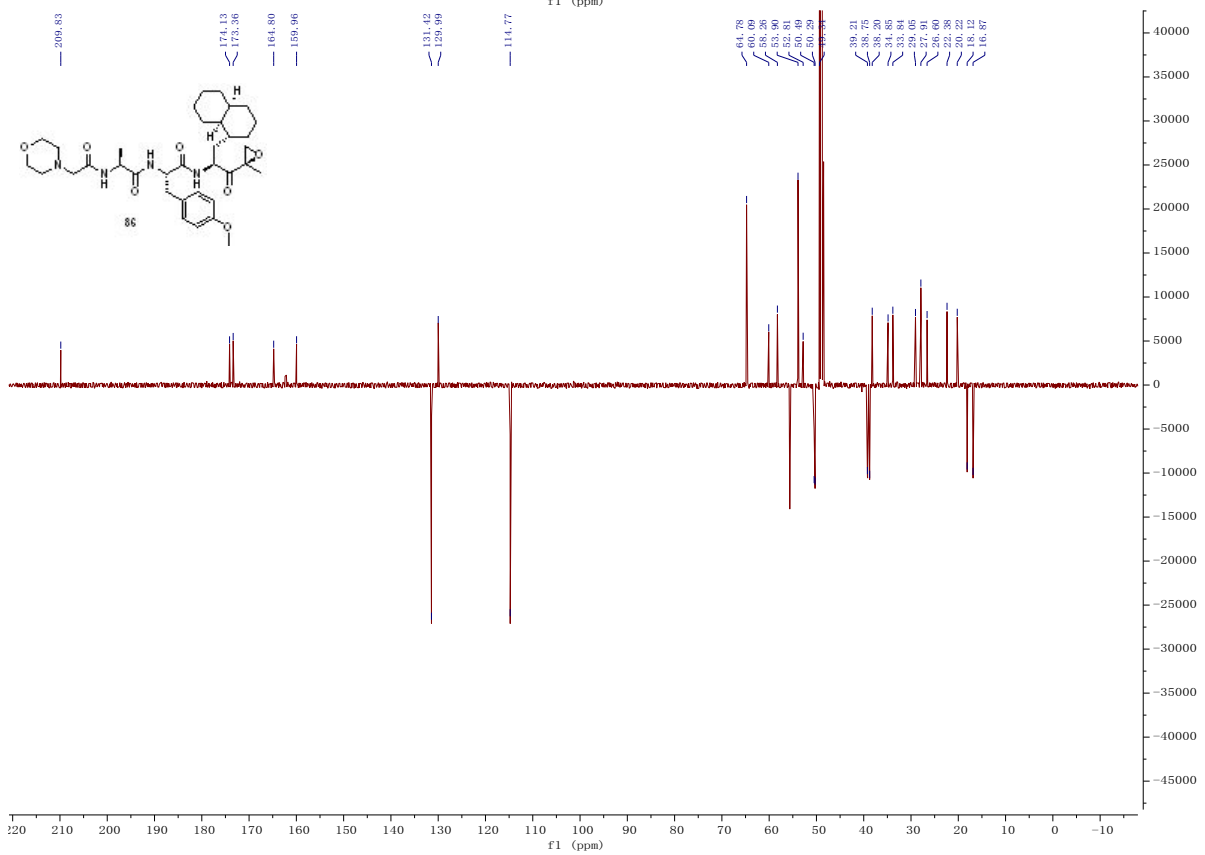



# LC-MS-spectra of compounds 13, 39, 68, 71, 74, 77, 86, 87.

\\UWPersonal\$1...lbo-Tao-LCMS13

3/7/2013 6:55:39 PM

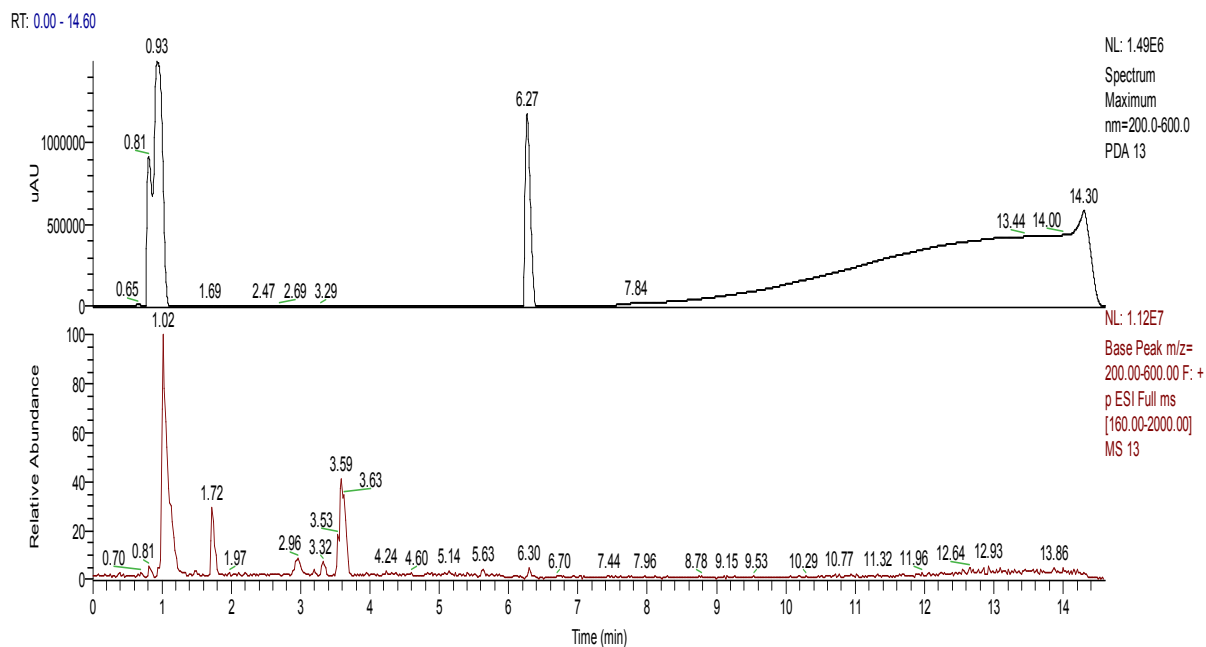

13#328-333 RT: 6.24-6.34 AV: 6 NL: 4.08E7

F: + p ESI Full ms [160.00-2000.00]

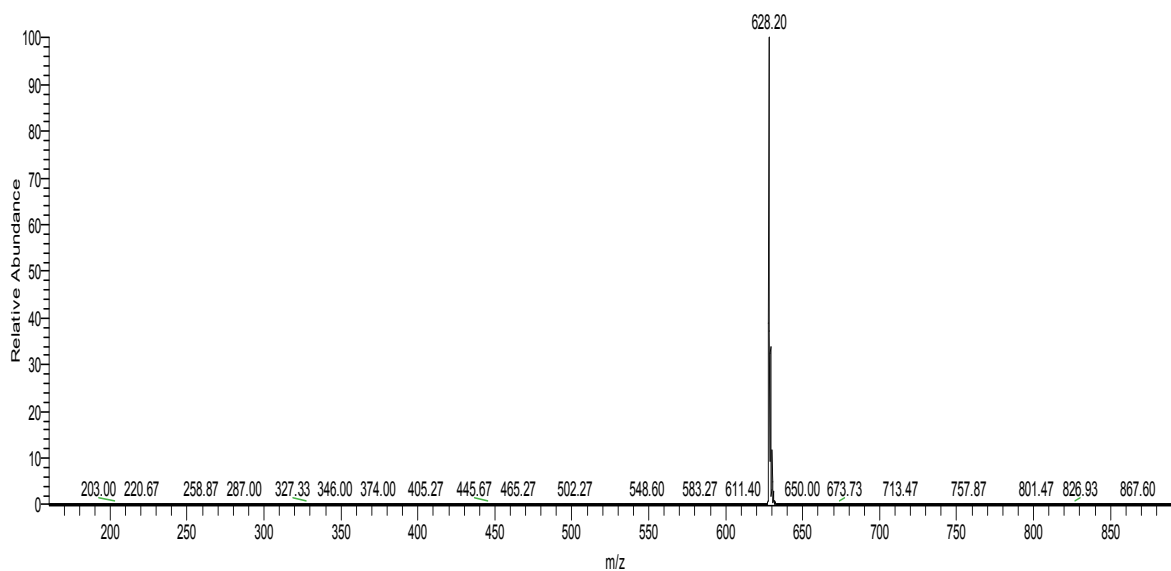

RT: 0.00 - 13.20

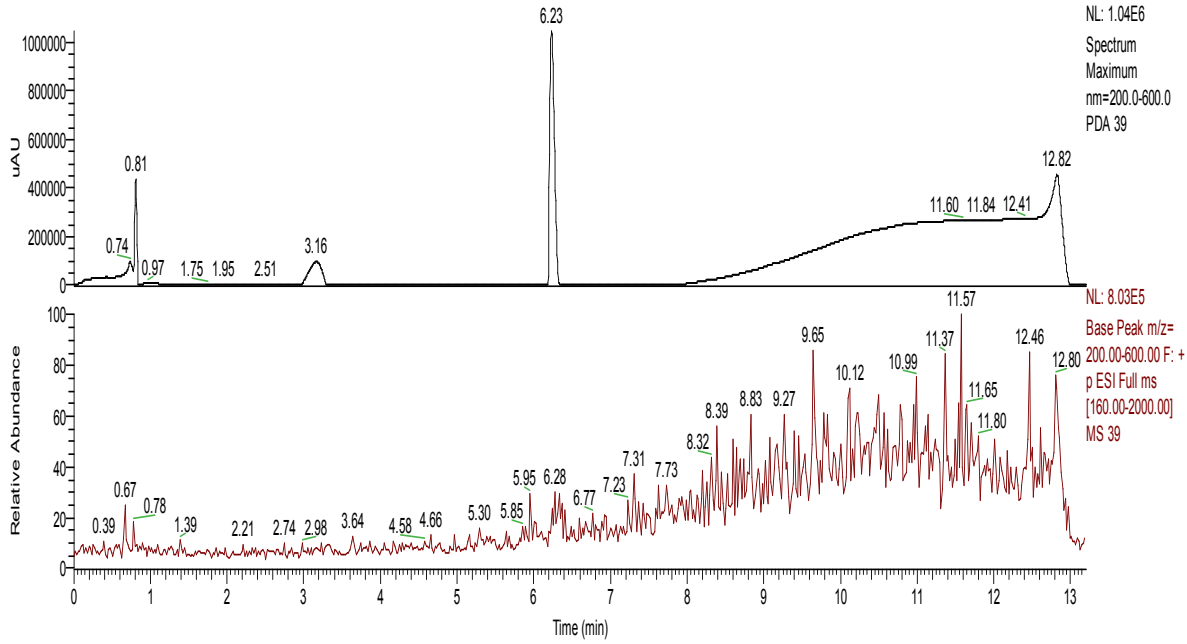

39 #319-326 RT: 6.20-6.33 AV: 8 NL: 5.46E6  
F: + p ESI Full ms [160.00-2000.00]

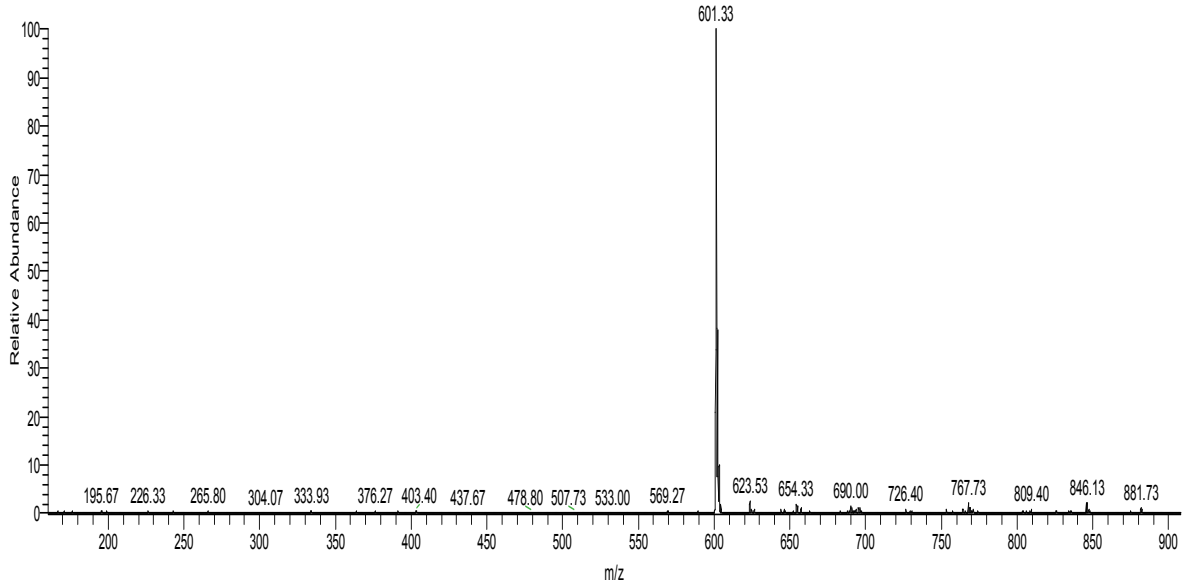

RT: 0.00 - 13.20

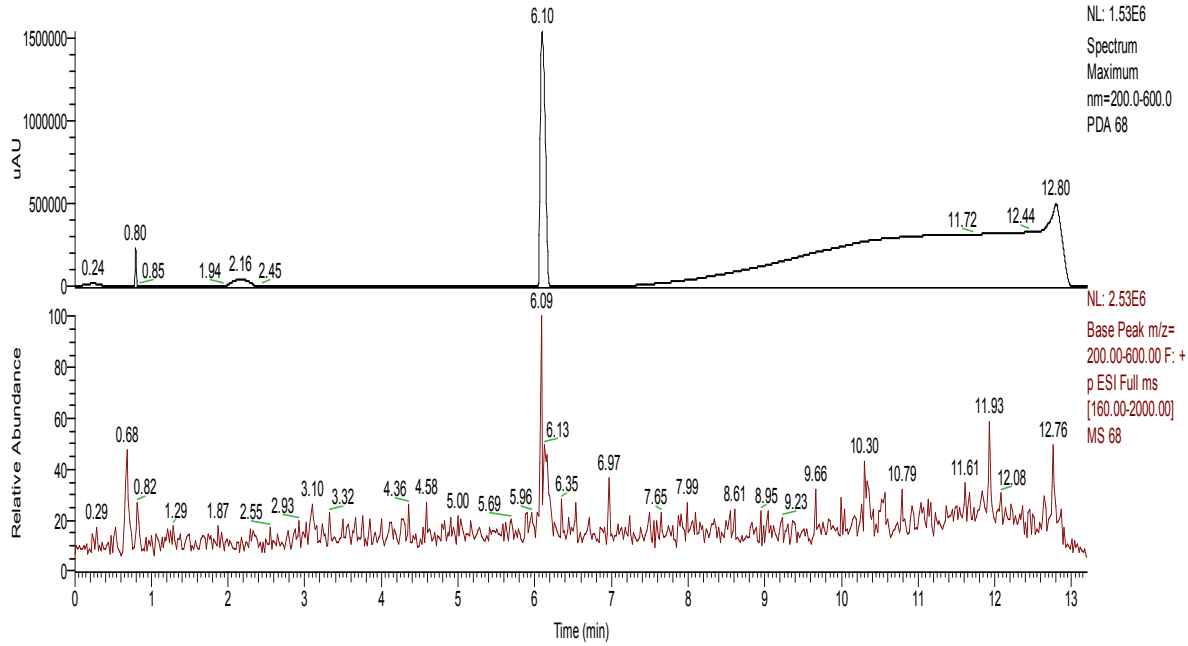

68 #321-329 RT: 6.03-6.18 AV: 9 NL: 3.06E7

F: + p ESI Full ms [160.00-2000.00]

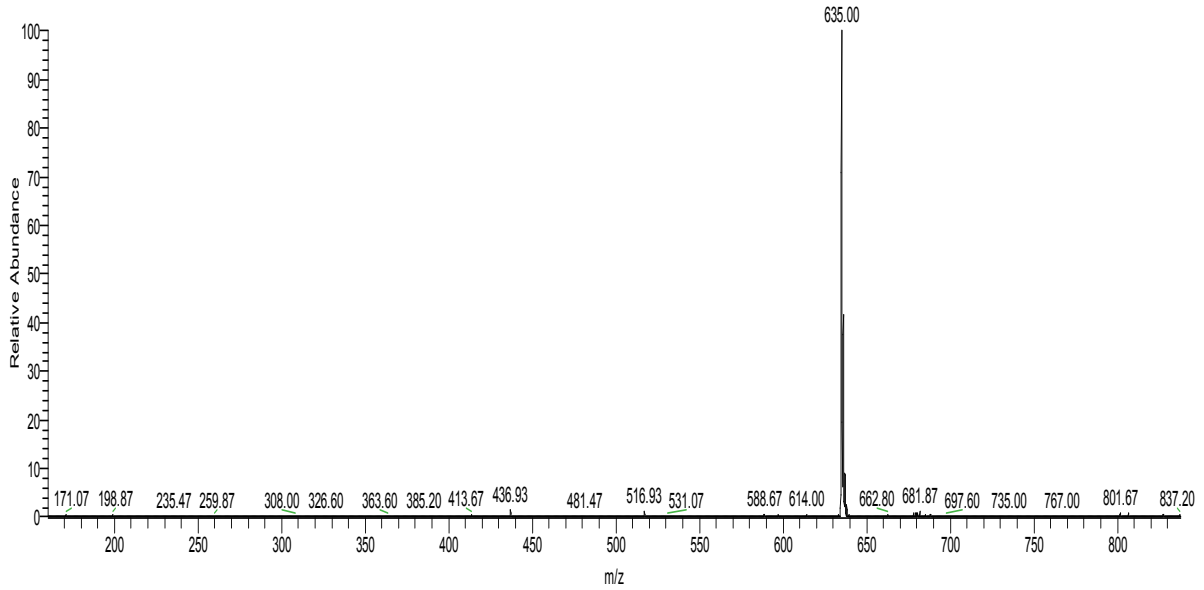

RT: 0.00 - 13.20

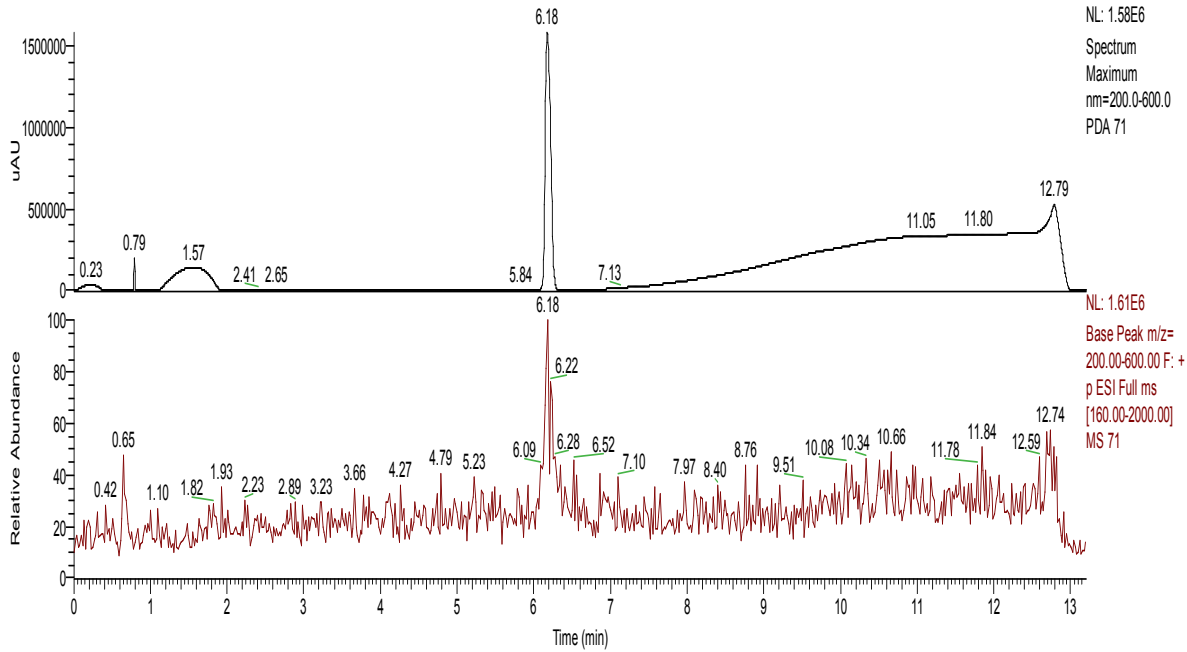

71 #322-334 RT: 6.05-6.28 AV: 13 NL: 2.27E7  
F: + p ESI Full ms [160.00-2000.00]

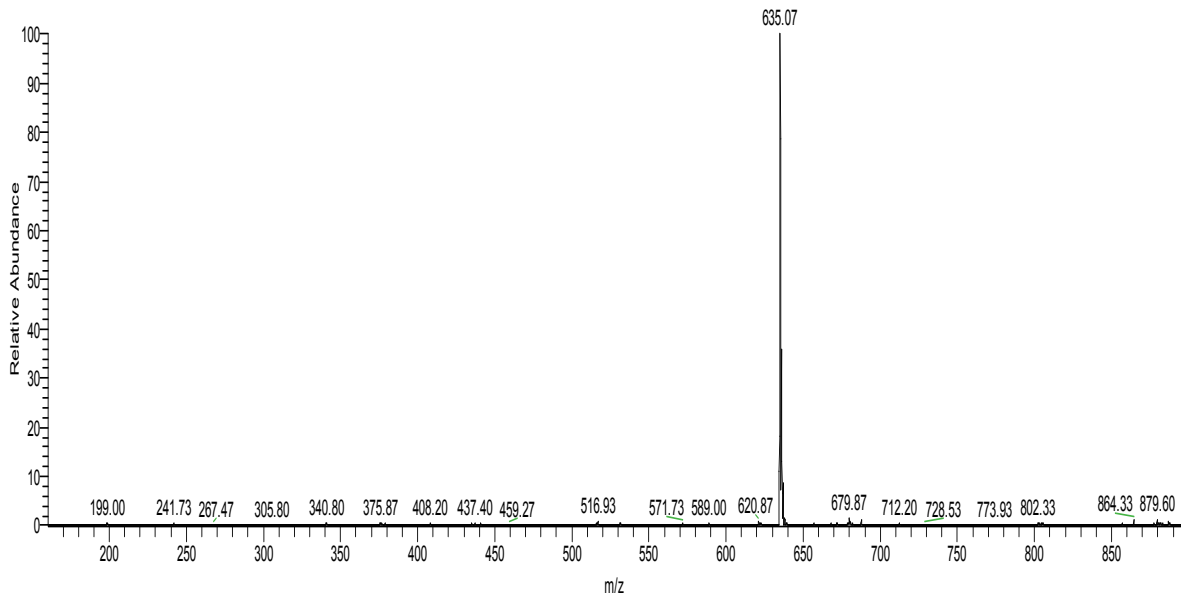



RT: 0.00 - 13.20

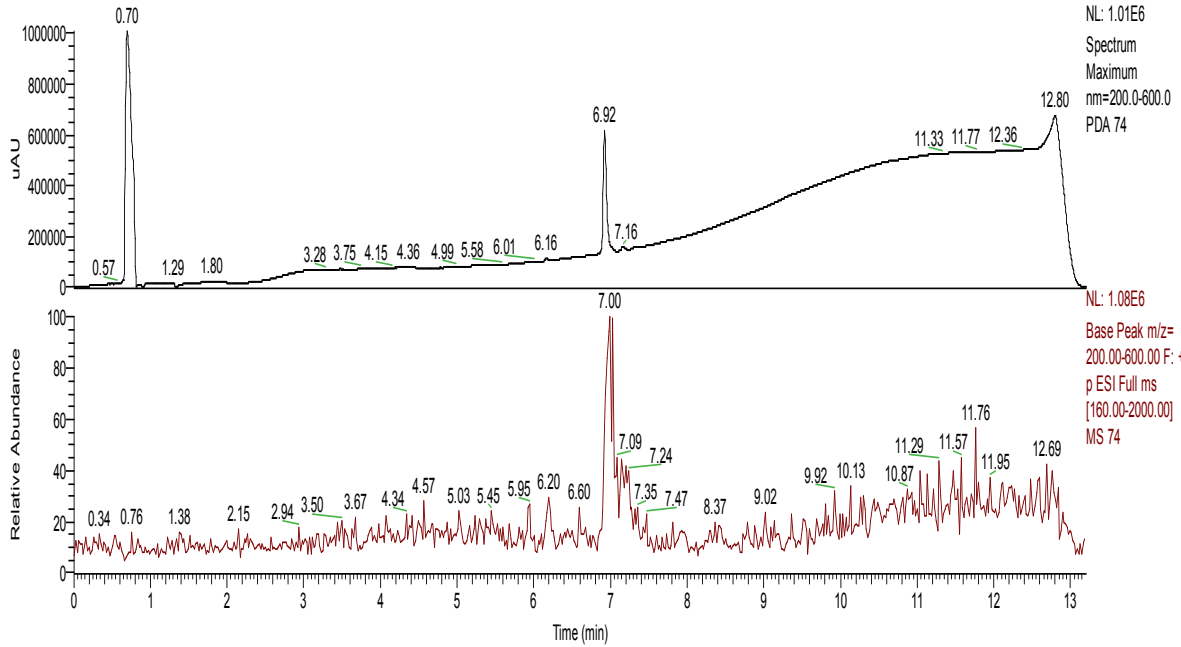

74 #357-368 RT: 6.84-7.05 AV: 12 NL: 3.33E6  
F: + p ESI Full ms [160.00-2000.00]

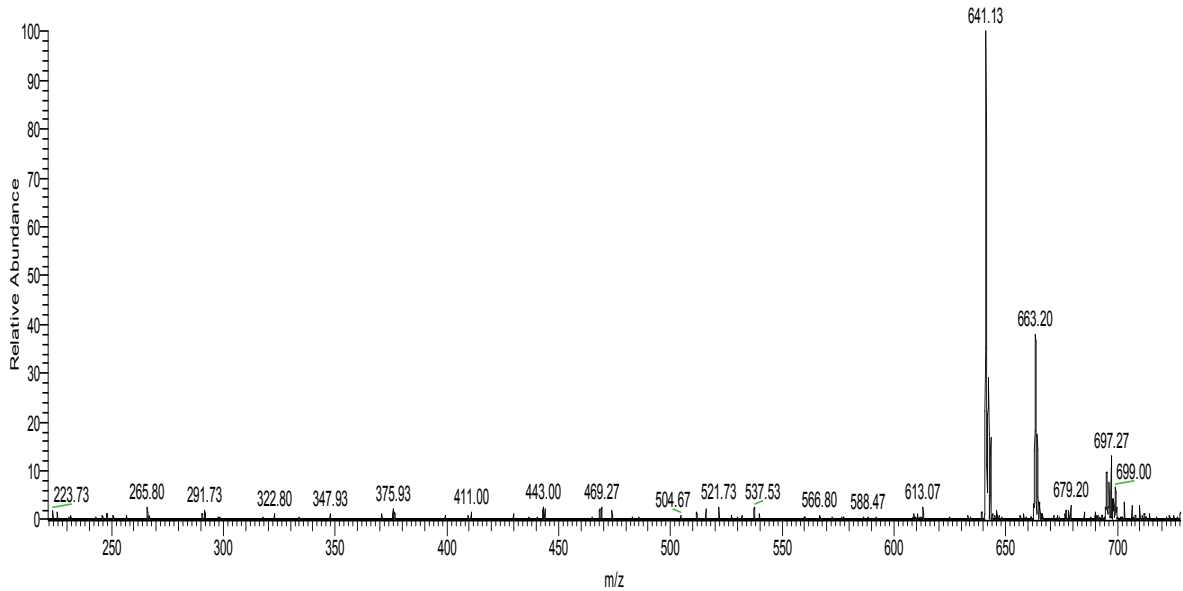

RT: 0.00 - 13.20

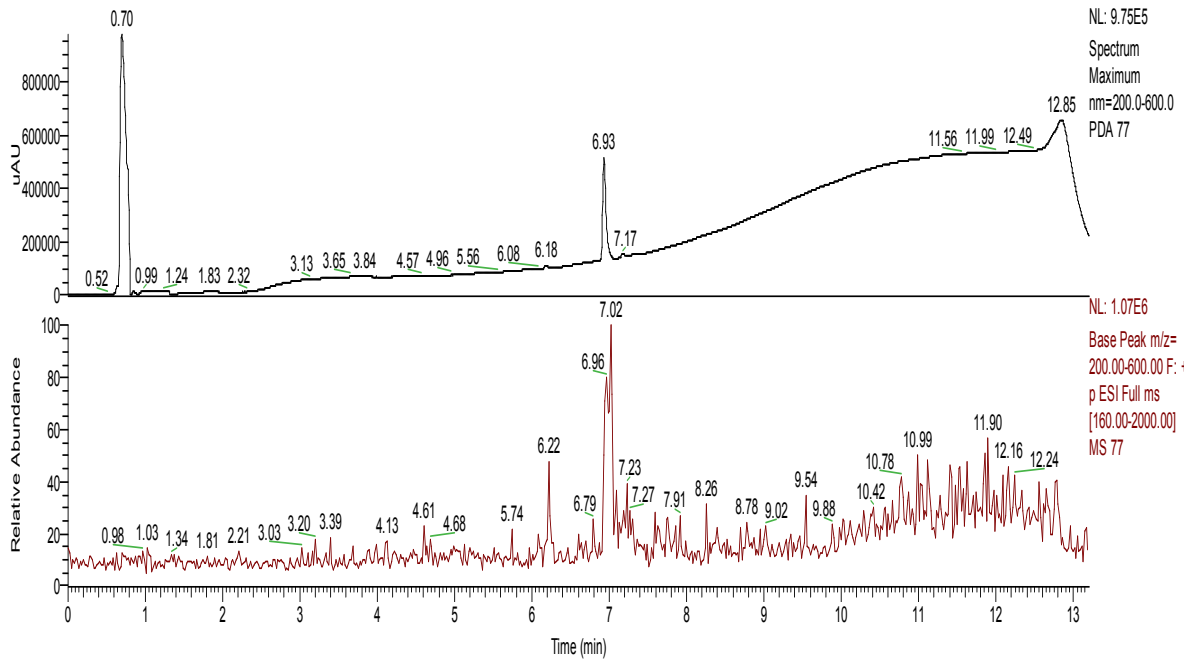

77 #362-365 RT: 6.96-7.02 AV: 4 NL: 7.29E6  
F: + p ESI Full ms [160.00-2000.00]

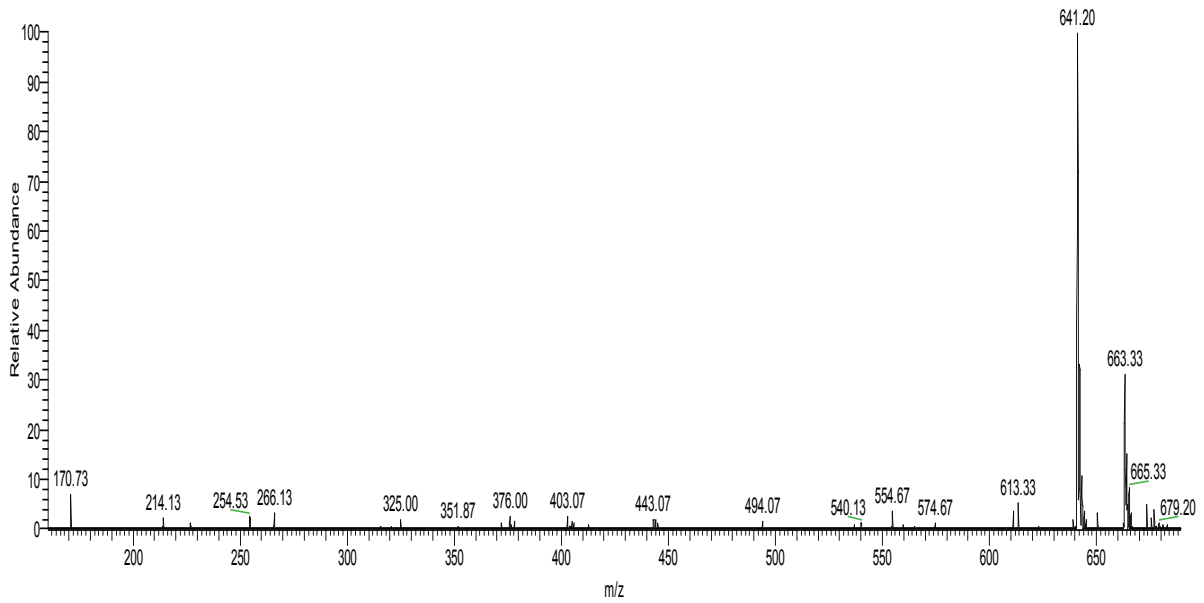

RT: 0.00 - 13.20

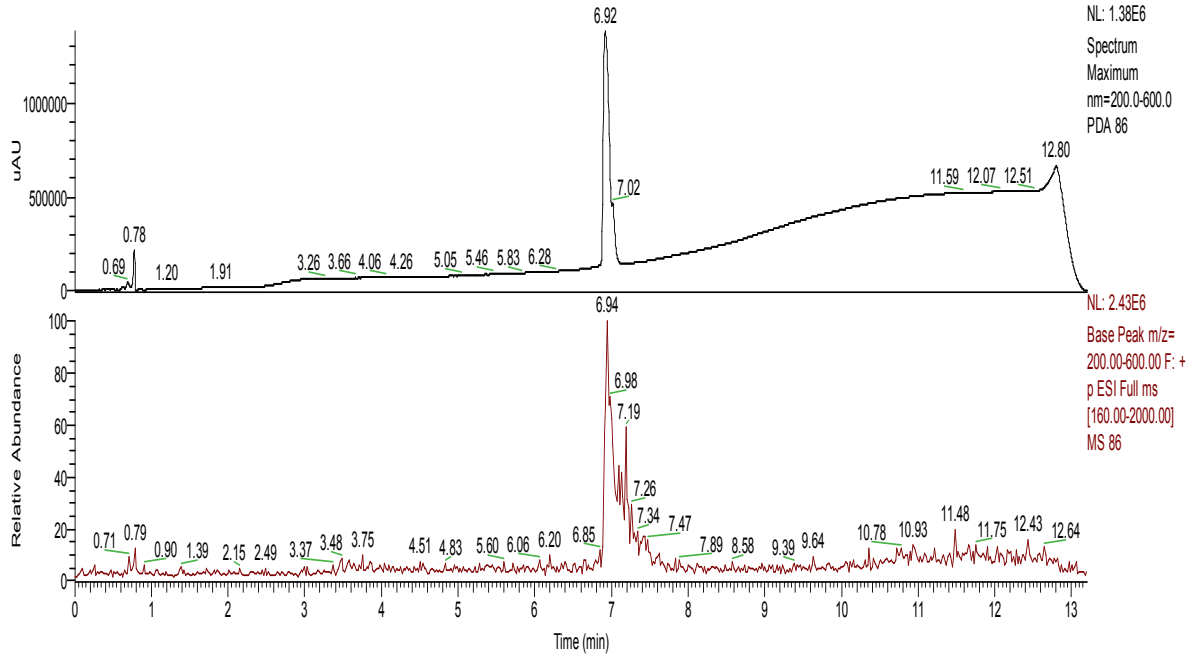

86 #357-367 RT: 6.91-7.09 AV: 11 NL: 2.04E7  
F: + p ESI Full ms [160.00-2000.00]

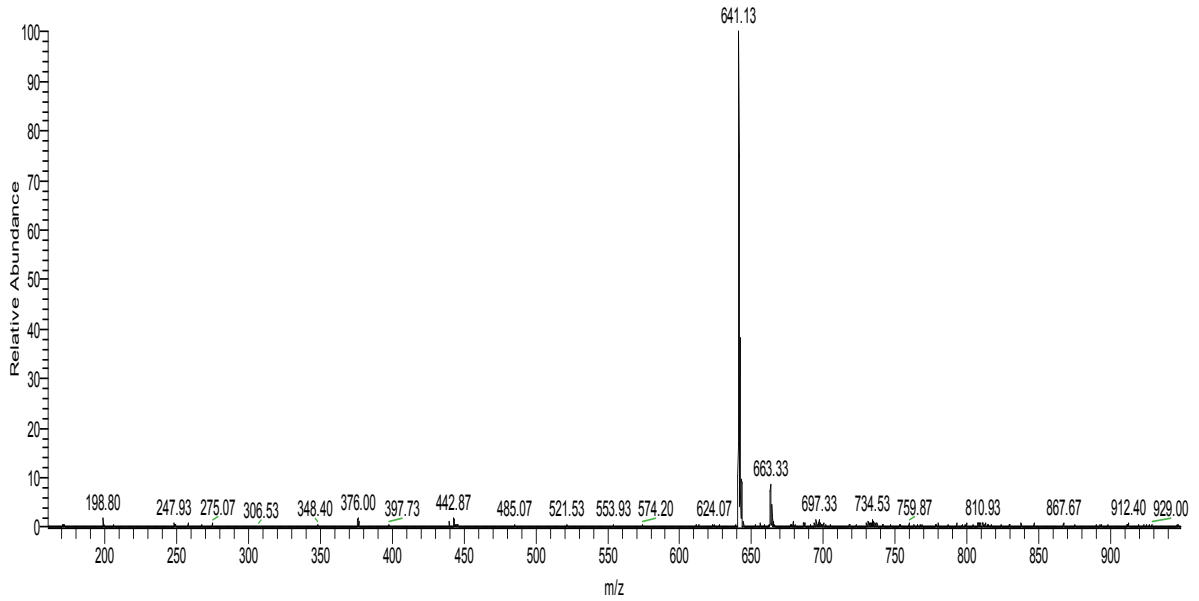

RT: 0.00 - 13.20

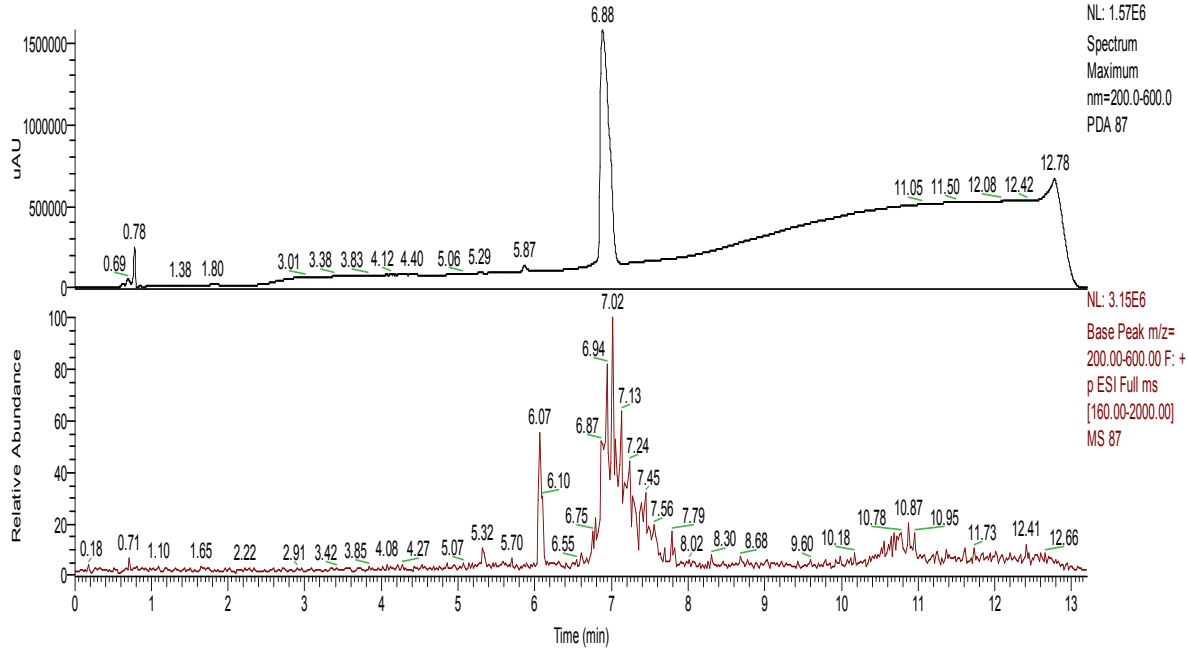

87 #352-374 RT: 6.83-7.24 AV: 23 NL: 1.98E7

F: + p ESI Full ms [160.00-2000.00]

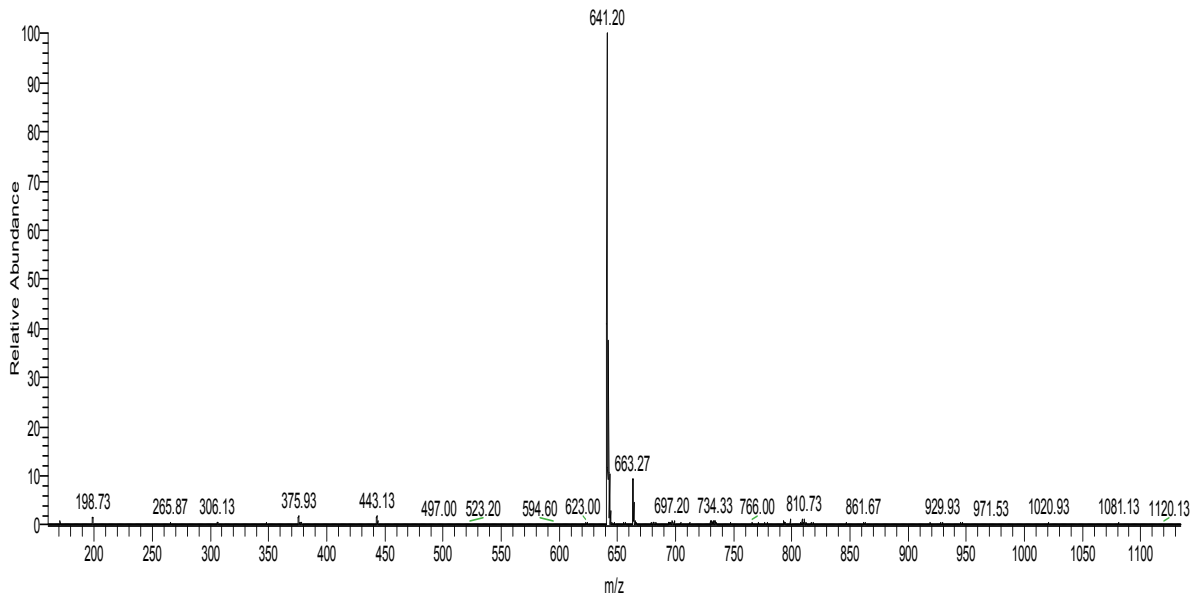

Supplement: jm8b01884_si_001.pdf [file jm8b01884_si_001.pdf]
